# Supplementary material for: Epidemiological and comparative genomic analysis of Bacillus anthracis isolated from northern Vietnam
Source: PLoS One. 2020 Feb 21;15(2):e0228116. doi: 10.1371/journal.pone.0228116 (PMC7034820; doi:10.1371/journal.pone.0228116)
Supplement: S3 Table — (XLSX) [file pone.0228116.s003.xlsx]

## Sheet: S3 Table
Supplementary table 3. The list of 4,976 core genome SNPs extracted by Parsnp.
#CHROM	POS	ID	REF	ALT	QUAL	FILTER	INFO	FORMAT	NC_007530AmesAncchr.gbk.fna	1DB1_2011.fa	2000031055.fa	2000032945.fa	2000032955.fa	2002013072.fa	2002721572.fa	2HG1_2015.fa	3154.fa	3166.fa	3LaLC_2011.fa	4LamDB-2013.fa	5QuyetLC_-2011.fa	6TuanDB-2011-5.fa	A0033.fa	A0062.fa	A0149.fa	A0150.fa	A0157.fa	A0241.fa	A0245.fa	A0264.fa	A0293.fa	A0303.fa	A0324.fa	A0362.fa	A0401.fa	A0628.fa	A0684.fa	A0843.fa	A0847.fa	A0853.fa	A0854.fa	A0860.fa	A0862a.fa	A0862b.fa	A0873.fa	A0878.fa	A0881.fa	A0891.fa	A0893.fa
NC_007530	295980	AGAATTGAGA.AGAGAAGCAA	A	T	40	PASS	NA	GT	0	0	0	0	0	0	0	0	1	0	0	0	0	0	0	0	0	0	0	0	0	0	0	0	0	0	0	0	0	0	0	0	0	0	0	0	0	0	0	0	0
NC_007530	296107	TGGCAGCTAA.GGAAATGGGA	G	A	40	PASS	NA	GT	0	0	0	0	0	0	0	0	0	0	0	0	0	0	0	0	0	0	0	0	0	0	0	0	0	0	0	0	0	0	0	0	0	0	0	0	0	0	0	0	0
NC_007530	296316	CCGCAAGGCA.GTCAGTTGTT	G	C	40	PASS	NA	GT	0	0	0	0	0	0	0	0	1	0	0	0	0	0	0	0	0	0	0	0	0	0	0	0	0	0	0	0	0	0	0	0	0	0	0	0	0	0	0	0	0
NC_007530	297281	TGGGCTGAGC.TTGGCGATAT	T	C	40	PASS	NA	GT	0	0	0	0	0	0	0	0	1	0	0	0	0	0	0	0	0	0	0	0	0	0	0	0	0	0	0	0	0	0	0	0	0	0	0	0	0	0	0	0	0
NC_007530	297794	GGATTAGAAG.CAGCACCAAT	C	T	40	PASS	NA	GT	0	0	0	0	0	0	0	0	0	0	0	0	0	0	0	0	0	0	0	0	0	0	0	0	0	0	0	0	0	0	0	0	0	0	0	0	0	0	0	0	0
NC_007530	300304	AAGATTTTAG.GCCGTCTGCC	G	A	40	PASS	NA	GT	0	0	0	0	0	0	0	0	1	0	0	0	0	0	0	0	0	0	0	0	0	0	0	0	0	0	0	0	0	0	0	0	0	0	0	0	0	0	0	0	0
NC_007530	300327	TTATACAGAA.ACAGGTTTAT	A	T	40	PASS	NA	GT	0	0	0	0	0	0	0	0	1	0	0	0	0	0	0	0	0	0	0	0	0	0	0	0	0	0	0	0	0	0	0	0	0	0	0	0	0	0	0	0	0
NC_007530	302024	AATCACCAAG.TATCGATTTA	T	C	40	PASS	NA	GT	0	0	0	0	0	0	0	0	1	1	0	0	0	0	0	0	0	0	1	0	0	0	0	0	0	0	0	0	0	0	0	0	0	0	0	0	0	0	0	0	0
NC_007530	302391	GGCTTGGAAA.GGGGCAATCC	G	T	40	PASS	NA	GT	0	0	1	0	0	0	0	0	0	0	0	0	0	0	0	0	0	0	0	0	0	0	0	0	0	0	0	0	0	0	0	0	0	0	0	0	0	0	0	0	0
NC_007530	303734	GAAATATGGC.GGCCTATGTA	G	T	40	PASS	NA	GT	0	0	1	0	0	0	0	0	0	0	0	0	0	0	0	0	0	0	0	0	0	0	0	0	0	0	0	0	0	0	0	0	0	0	0	0	0	0	0	0	0
NC_007530	307318	AAGGTATATG.TAGCACCAGG	T	A	40	PASS	NA	GT	0	0	0	0	0	0	0	0	1	0	0	0	0	0	0	0	0	0	0	0	0	0	0	0	0	0	0	0	0	0	0	0	0	0	0	0	0	0	0	0	0
NC_007530	309591	TAAAAATGAT.ATCACTTTTA	A	G	40	PASS	NA	GT	0	0	0	0	0	1	0	0	0	0	0	0	0	0	0	0	0	0	0	0	0	0	0	0	0	0	0	0	0	0	0	0	0	0	0	0	0	0	0	0	0
NC_007530	311166	AGCAGTAAAA.GGAGAGTAGG	G	A	40	PASS	NA	GT	0	0	0	0	0	0	0	0	0	0	0	0	0	0	0	0	0	0	0	0	0	0	0	0	0	0	0	0	0	0	0	0	0	0	0	0	0	0	0	0	0
NC_007530	311167	GCAGTAAAAG.GAGAGTAGGT	G	A	40	PASS	NA	GT	0	0	0	0	0	0	0	0	0	0	0	0	0	0	0	0	0	0	0	0	0	0	0	0	0	0	0	0	0	0	0	0	0	0	0	0	0	0	0	0	0
NC_007530	311237	AACAACAAAA.AGCAGTACAA	A	T	40	PASS	NA	GT	0	0	0	0	0	0	0	0	0	0	0	0	0	0	0	0	0	0	0	0	0	0	0	0	0	0	0	0	0	0	0	0	0	0	0	0	0	0	0	0	0
NC_007530	311246	AAGCAGTACA.AACAACGAAC	A	T	40	PASS	NA	GT	0	0	0	0	0	0	0	0	0	0	0	0	0	0	0	0	0	0	0	0	0	0	0	0	0	0	0	0	0	0	0	0	0	0	0	0	0	0	0	0	0
NC_007530	311247	AGCAGTACAA.ACAACGAACG	A	G	40	PASS	NA	GT	0	0	0	0	0	0	0	0	0	0	0	0	0	0	0	0	0	0	0	0	0	0	0	0	0	0	0	0	0	0	0	0	0	0	0	0	0	0	0	0	0
NC_007530	311290	GCAGGTAGTG.GTAAAACACG	G	C	40	PASS	NA	GT	0	0	0	0	0	0	0	0	0	0	0	0	0	0	0	0	0	0	0	0	0	0	0	0	0	0	0	0	0	0	0	0	0	0	0	0	0	0	0	0	0
NC_007530	311316	AACACATCGT.ATTGCGTATT	A	T	40	PASS	NA	GT	0	0	0	0	0	0	0	0	0	0	0	0	0	0	0	0	0	0	0	0	0	0	0	0	0	0	0	0	0	0	0	0	0	0	0	0	0	0	0	0	0
NC_007530	311317	ACACATCGTA.TTGCGTATTT	T	G	40	PASS	NA	GT	0	0	0	0	0	0	0	0	0	0	0	0	0	0	0	0	0	0	0	0	0	0	0	0	0	0	0	0	0	0	0	0	0	0	0	0	0	0	0	0	0
NC_007530	311403	TGAAATGCGC.GAGCGTATTG	G	T	40	PASS	NA	GT	0	0	0	0	0	0	0	0	0	0	0	0	0	0	0	0	0	0	0	0	0	0	0	0	0	0	0	0	0	0	0	0	0	0	0	0	0	0	0	0	0
NC_007530	314122	TACGGTCTTG.CGAATGTAGA	C	G	40	PASS	NA	GT	0	0	0	0	0	0	0	0	0	0	0	0	0	0	0	0	0	0	0	0	1	0	0	0	0	0	0	0	0	0	0	0	0	0	0	0	0	0	0	0	0
NC_007530	314755	GAAGGGTTAA.TCCATTTCGT	T	G	40	PASS	NA	GT	0	0	0	0	0	0	0	0	1	0	0	0	0	0	0	0	0	0	0	0	0	0	0	0	0	0	0	0	0	0	0	0	0	0	0	0	0	0	0	0	0
NC_007530	314756	AAGGGTTAAT.CCATTTCGTT	C	A	40	PASS	NA	GT	0	0	0	0	0	0	0	0	1	0	0	0	0	0	0	0	0	0	0	0	0	0	0	0	0	0	0	0	0	0	0	0	0	0	0	0	0	0	0	0	0
NC_007530	314871	GTTGACGAAA.GAGCAATTAT	G	A	40	PASS	NA	GT	0	0	0	0	0	0	0	0	1	0	0	0	0	0	0	0	0	0	0	0	0	0	0	0	0	0	0	0	0	0	0	0	0	0	0	0	0	0	0	0	0
NC_007530	316074	AAGAGCATGG.GTATCCGCGT	G	A	40	PASS	NA	GT	0	0	0	0	0	0	0	0	0	0	0	0	0	0	0	0	0	0	0	0	0	0	0	0	0	0	0	0	0	0	0	0	0	0	0	0	0	0	0	0	0
NC_007530	316749	AATGGGGTAA.GGGGTAAAGG	G	T	40	PASS	NA	GT	0	0	1	0	0	0	0	0	0	0	0	0	0	0	0	0	0	0	0	0	0	0	0	0	0	0	0	0	0	0	0	0	0	0	0	0	0	0	0	0	0
NC_007530	317006	AGTTAATCCC.GTTAACTGTT	G	T	40	PASS	NA	GT	0	0	0	0	0	0	0	0	0	1	0	0	0	0	0	0	0	0	0	0	0	0	0	0	0	0	0	0	0	0	0	0	0	0	0	0	0	0	0	0	0
NC_007530	317010	AATCCCGTTA.ACTGTTATAG	A	T	40	PASS	NA	GT	0	0	0	0	0	0	0	0	0	1	0	0	0	0	0	0	0	0	0	0	0	0	0	0	0	0	0	0	0	0	0	0	0	0	0	0	0	0	0	0	0
NC_007530	317098	ATGTTGGTGT.TTATTGCTAT	T	A	40	PASS	NA	GT	0	0	0	0	0	0	0	0	1	0	0	0	0	0	0	0	0	0	0	0	0	0	0	0	0	0	0	0	0	0	0	0	0	0	0	0	0	0	0	0	0
NC_007530	318254	TTATGGCAGG.TATGACAACA	T	G	40	PASS	NA	GT	0	0	0	0	0	0	0	0	0	0	0	0	0	0	0	0	0	0	0	0	0	0	0	0	0	0	0	0	0	0	0	0	0	0	0	0	0	0	0	0	0
NC_007530	319271	GCGAAGATCT.CTTTTTTTGA	C	T	40	PASS	NA	GT	0	0	0	0	0	0	0	0	0	0	0	0	0	0	0	0	0	0	0	0	0	0	0	0	0	0	0	0	0	0	0	0	0	0	0	0	0	0	0	0	0
NC_007530	319937	AAAGGTCTTT.TGTAGCACAA	T	A	40	PASS	NA	GT	0	0	0	0	0	0	0	0	1	0	0	0	0	0	0	0	0	0	0	0	0	0	0	0	0	0	0	0	0	0	0	0	0	0	0	0	0	0	0	0	0
NC_007530	321397	AAAGTAAATC.GAGAATATAA	G	A	40	PASS	NA	GT	0	0	0	0	0	0	0	0	0	0	0	0	0	0	0	0	0	0	0	0	0	0	0	0	0	0	0	0	0	0	0	0	0	0	0	0	0	0	0	0	0
NC_007530	321597	AAGTGTTTTA.GCGAAAATTC	G	T	40	PASS	NA	GT	0	0	1	0	0	0	0	0	0	0	0	0	0	0	0	0	0	0	0	0	0	0	0	0	0	0	0	0	0	0	0	0	0	0	0	0	0	0	0	0	0
NC_007530	322949	AATGATCCAA.CGAACCAAGC	C	T	40	PASS	NA	GT	0	0	0	0	0	0	0	0	0	0	0	0	0	0	0	0	0	0	0	0	0	0	0	0	0	0	0	0	0	0	0	0	0	0	0	0	0	0	0	0	0
NC_007530	323101	ACCTCGTGTA.TTAAAAGATG	T	C	40	PASS	NA	GT	0	0	0	0	0	0	0	0	1	0	0	0	0	0	0	0	0	0	0	0	0	0	0	0	0	0	0	0	0	0	0	0	0	0	0	0	0	0	0	0	0
NC_007530	323288	GAATTATATC.ATTCAAAAGA	A	G	40	PASS	NA	GT	0	0	0	0	0	0	0	0	1	1	0	0	0	0	0	0	0	0	0	0	0	0	0	0	0	0	0	0	0	0	0	0	0	0	0	0	0	0	0	0	0
NC_007530	323320	AATTAAGAAA.GAAACAAATG	G	T	40	PASS	NA	GT	0	0	0	0	0	0	0	0	1	0	0	0	0	0	0	0	0	0	0	0	0	0	0	0	0	0	0	0	0	0	0	0	0	0	0	0	0	0	0	0	0
NC_007530	323321	ATTAAGAAAG.AAACAAATGA	A	T	40	PASS	NA	GT	0	0	0	0	0	0	0	0	1	0	0	0	0	0	0	0	0	0	0	0	0	0	0	0	0	0	0	0	0	0	0	0	0	0	0	0	0	0	0	0	0
NC_007530	323322	TTAAGAAAGA.AACAAATGAT	A	C	40	PASS	NA	GT	0	0	0	0	0	0	0	0	1	0	0	0	0	0	0	0	0	0	0	0	0	0	0	0	0	0	0	0	0	0	0	0	0	0	0	0	0	0	0	0	0
NC_007530	323707	ATGAAAACTG.TGGATATTAC	T	C	40	PASS	NA	GT	0	1	1	1	1	1	1	1	1	1	1	1	1	1	1	1	1	1	1	1	1	1	1	1	1	1	1	1	1	1	1	1	1	1	1	1	1	1	1	1	1
NC_007530	326396	TCTTGTTTTG.TATTACAAAA	T	C	40	PASS	NA	GT	0	0	0	0	0	0	0	0	0	1	0	0	0	0	0	0	0	0	0	0	0	0	0	0	0	0	0	0	0	0	0	0	0	0	0	0	0	0	0	0	0
NC_007530	327562	AAATCGGACC.GATTACACGT	G	A	40	PASS	NA	GT	0	0	0	0	0	0	0	0	0	0	0	0	0	0	0	0	0	0	0	0	0	0	0	0	0	0	0	0	0	0	0	0	0	0	0	0	0	0	0	0	0
NC_007530	327750	GAAGCCCGTG.AGTCAGTGCT	A	T	40	PASS	NA	GT	0	0	0	0	0	0	0	0	0	0	0	0	0	0	0	0	0	0	0	0	0	0	0	0	0	0	0	0	0	0	0	0	0	0	0	0	0	0	0	0	0
NC_007530	327762	TCAGTGCTAG.CTGCTTTAAA	C	A	40	PASS	NA	GT	0	0	0	0	0	0	0	0	0	0	0	0	0	0	0	0	0	0	0	0	0	0	0	0	0	0	0	0	0	0	0	0	0	0	0	0	0	0	0	0	0
NC_007530	327763	CAGTGCTAGC.TGCTTTAAAA	T	G	40	PASS	NA	GT	0	0	0	0	0	0	0	0	0	0	0	0	0	0	0	0	0	0	0	0	0	0	0	0	0	0	0	0	0	0	0	0	0	0	0	0	0	0	0	0	0
NC_007530	327963	ACACGTAGCG.AAGGCTTCGG	A	C	40	PASS	NA	GT	0	0	0	0	0	0	0	0	0	1	0	0	0	0	0	0	0	0	0	0	0	0	0	0	0	0	0	0	0	0	0	0	0	0	0	0	0	0	0	0	0
NC_007530	328153	TTAAAGTGGG.CGAAAAAGTT	C	T	40	PASS	NA	GT	0	0	0	0	0	0	0	0	0	0	0	0	0	0	0	0	0	0	0	0	0	0	0	0	0	0	0	0	0	0	0	0	0	0	0	0	0	0	0	0	0
NC_007530	328988	TCTCTTCGTC.CAGTTGGACA	C	A	40	PASS	NA	GT	0	0	0	0	0	0	0	0	1	0	0	0	0	0	0	0	0	0	0	0	0	0	0	0	0	0	0	0	0	0	0	0	0	0	0	0	0	0	0	0	0
NC_007530	331283	TATTTTATAT.CCATACTTTA	C	A	40	PASS	NA	GT	0	0	0	0	0	0	0	0	1	0	0	0	0	0	0	0	0	0	0	0	0	0	0	0	0	0	0	0	0	0	0	0	0	0	0	0	0	0	0	0	0
NC_007530	333579	TATGAGAAAG.CAAATACTGC	C	T	40	PASS	NA	GT	0	0	0	1	0	0	0	0	0	0	0	0	0	0	0	0	0	0	0	0	0	1	0	0	0	0	0	0	0	0	0	0	0	0	0	0	0	0	0	0	0
NC_007530	335582	GCCCCAGCGC.TTGCAGCAGG	T	C	40	PASS	NA	GT	0	0	0	0	0	0	0	0	1	0	0	0	0	0	0	0	0	0	0	0	0	0	0	0	0	0	0	0	0	0	0	0	0	0	0	0	0	0	0	0	0
NC_007530	336138	CAGTTTTATA.TGGTGGTCAA	T	A	40	PASS	NA	GT	0	0	0	0	0	0	0	0	1	0	0	0	0	0	0	0	0	0	0	0	0	0	0	0	0	0	0	0	0	0	0	0	0	0	0	0	0	0	0	0	0
NC_007530	337241	TGAGAACCTT.TATCTGTTTC	T	C	40	PASS	NA	GT	0	1	1	1	1	1	1	1	1	1	1	1	1	1	1	1	1	1	1	1	1	1	1	1	1	1	1	1	1	1	1	1	1	1	1	1	1	1	1	1	1
NC_007530	337316	CCGTTTTCAA.ATGTTAACGT	A	C	40	PASS	NA	GT	0	0	0	0	0	0	0	0	1	0	0	0	0	0	0	0	0	0	0	0	0	0	0	0	0	0	0	0	0	0	0	0	0	0	0	0	0	0	0	0	0
NC_007530	338014	GTGTTTTGCA.CCAGATTTAT	C	G	40	PASS	NA	GT	0	0	0	0	0	0	0	0	0	1	0	0	0	0	0	0	0	0	0	0	0	0	0	0	0	0	0	0	0	0	0	0	0	0	0	0	0	0	0	0	0
NC_007530	338556	CGGCAAGTCC.GCATGTGTTG	G	A	40	PASS	NA	GT	0	0	0	0	0	0	0	0	1	0	0	0	0	0	0	0	0	0	0	0	0	0	0	0	0	0	0	0	0	0	0	0	0	0	0	0	0	0	0	0	0
NC_007530	339442	GGATATACCC.TTGTTCATCA	T	A	40	PASS	NA	GT	0	0	0	0	0	0	0	0	1	0	0	0	0	0	0	0	0	0	0	0	0	0	0	0	0	0	0	0	0	0	0	0	0	0	0	0	0	0	0	0	0
NC_007530	339465	CATTTTAGTA.ATAAGATAGT	A	C	40	PASS	NA	GT	0	0	0	0	0	0	0	0	1	0	0	0	0	0	0	0	0	0	0	0	0	0	0	0	0	0	0	0	0	0	0	0	0	0	0	0	0	0	0	0	0
NC_007530	339758	CCACGTAATT.CCTCATCATA	C	A	40	PASS	NA	GT	0	0	1	0	0	0	0	0	0	0	0	0	0	0	0	0	0	0	0	0	0	0	0	0	0	0	0	0	0	0	0	0	0	0	0	0	0	0	0	0	0
NC_007530	340614	TATACTTTTT.CATTCTATCA	C	T	40	PASS	NA	GT	0	0	0	0	0	0	0	0	0	0	0	0	0	0	0	0	0	0	0	0	0	0	0	0	0	0	0	0	0	0	0	0	0	0	0	0	0	0	0	1	0
NC_007530	342103	AAAACGCTCG.TTATATTACT	T	G	40	PASS	NA	GT	0	0	0	0	0	0	0	0	0	0	0	0	0	1	0	0	0	0	0	0	0	0	0	0	0	0	0	0	0	0	0	0	0	0	0	0	0	0	0	0	0
NC_007530	342639	AAATTGTTAA.AGTGAAGAAA	A	G	40	PASS	NA	GT	0	0	0	0	0	0	0	0	1	0	0	0	0	0	0	0	0	0	0	0	0	0	0	0	0	0	0	0	0	0	0	0	0	0	0	0	0	0	0	0	0
NC_007530	343405	CGCCAAATTA.GATGGCAACG	G	T	40	PASS	NA	GT	0	0	0	0	0	0	0	0	0	0	0	0	0	0	0	0	0	0	0	0	0	0	0	0	0	0	0	0	0	0	0	0	0	0	1	1	0	0	0	0	0
NC_007530	343657	GCGTAAAGGT.TGTGATGAGG	T	A	40	PASS	NA	GT	0	0	0	0	0	0	0	0	1	0	0	0	0	0	0	0	0	0	0	0	0	0	0	0	0	0	0	0	0	0	0	0	0	0	0	0	0	0	0	0	0
NC_007530	345403	GATAAAGGTG.GGAACAAAAA	G	A	40	PASS	NA	GT	0	0	0	0	0	0	0	0	0	1	0	0	0	0	0	0	0	0	0	0	0	0	0	0	0	0	0	0	0	0	0	0	0	0	0	0	0	0	0	0	0
NC_007530	345517	AAATTAGTAT.TTCATAACAC	T	A	40	PASS	NA	GT	0	0	0	0	0	0	0	0	1	0	0	0	0	0	0	0	0	0	0	0	0	0	0	0	0	0	0	0	0	0	0	0	0	0	0	0	0	0	0	0	0
NC_007530	345784	GGTGTATGAG.GGAAATAGAA	G	A	40	PASS	NA	GT	0	0	0	0	0	0	0	0	1	0	0	0	0	0	0	0	0	0	0	0	0	0	0	0	0	0	0	0	0	0	0	0	0	0	0	0	0	0	0	0	0
NC_007530	347639	CGAAAGCAAT.GCCTGTTGTC	G	A	40	PASS	NA	GT	0	0	0	0	0	0	0	0	0	0	0	0	0	0	0	0	0	0	0	0	0	0	0	0	0	0	0	0	0	0	0	0	0	0	0	0	0	0	0	0	0
NC_007530	347921	TCGGCAGTTC.GGATGAACAT	G	T	40	PASS	NA	GT	0	0	0	0	0	0	0	0	0	1	0	0	0	0	0	0	0	0	0	0	0	0	0	0	0	0	0	0	0	0	0	0	0	0	0	0	0	0	0	0	0
NC_007530	348233	ATTTTGTTTT.AATCTGCCCT	A	T	40	PASS	NA	GT	0	0	0	0	0	0	0	0	1	0	0	0	0	0	0	0	0	0	0	0	0	0	0	0	0	0	0	0	0	0	0	0	0	0	0	0	0	0	0	0	0
NC_007530	349052	TTTTTACCCA.TTATATCAAA	T	C	40	PASS	NA	GT	0	0	0	0	0	0	0	0	0	0	0	0	0	0	0	0	0	0	0	0	0	0	0	0	0	0	0	0	0	0	0	0	0	0	0	0	0	0	0	0	0
NC_007530	350998	GAATGTAGTC.CTTTTTCTGT	C	T	40	PASS	NA	GT	0	0	0	0	0	0	0	0	1	1	0	0	0	0	0	0	0	0	1	0	0	0	0	0	0	0	0	0	0	0	0	0	0	0	0	0	0	0	0	0	0
NC_007530	351222	AGAGACTGTA.TTCATCATCG	T	C	40	PASS	NA	GT	0	0	0	0	0	1	0	0	0	0	0	0	0	0	0	0	0	0	0	0	0	0	0	0	0	0	0	0	0	0	0	0	0	0	0	0	0	0	0	0	0
NC_007530	352358	TAAAATTCAA.TATGTTCATA	T	A	40	PASS	NA	GT	0	0	0	0	0	0	0	0	1	0	0	0	0	0	0	0	0	0	0	0	0	0	0	0	0	0	0	0	0	0	0	0	0	0	0	0	0	0	0	0	0
NC_007530	352359	AAAATTCAAT.ATGTTCATAA	A	C	40	PASS	NA	GT	0	0	0	0	0	0	0	0	1	0	0	0	0	0	0	0	0	0	0	0	0	0	0	0	0	0	0	0	0	0	0	0	0	0	0	0	0	0	0	0	0
NC_007530	352624	ATGGGAATCC.GGTTGTTGCG	G	C	40	PASS	NA	GT	0	0	0	0	0	0	0	0	0	1	0	0	0	0	0	0	0	0	0	0	0	0	0	0	0	0	0	0	0	0	0	0	0	0	0	0	0	0	0	0	0
NC_007530	353853	AAAACGTAGT.GACCGAGTTG	G	A	40	PASS	NA	GT	0	0	0	0	0	0	0	0	0	0	0	0	0	0	0	0	0	0	0	0	0	0	0	0	0	0	0	0	0	0	0	0	0	0	0	0	0	1	0	0	0
NC_007530	354255	AAGATTACCT.GGGGCTTATG	G	A	40	PASS	NA	GT	0	0	0	0	0	0	0	0	0	0	0	0	0	0	0	0	0	0	0	0	0	0	0	0	0	0	0	0	0	0	0	0	0	0	0	0	0	0	0	0	0
NC_007530	354422	TAGAGATGAT.GATTTGTTTG	G	A	40	PASS	NA	GT	0	0	0	0	0	0	0	0	0	0	0	0	0	0	0	0	0	0	0	1	0	0	0	0	0	0	0	0	0	0	0	0	0	0	0	0	0	0	0	0	0
NC_007530	355644	TCCTAATGGA.ATACCAGCGA	A	C	40	PASS	NA	GT	0	0	0	0	0	0	0	0	1	0	0	0	0	0	0	0	0	0	0	0	0	0	0	0	0	0	0	0	0	0	0	0	0	0	0	0	0	0	0	0	0
NC_007530	356013	TTAATTTTGT.TAACAAGAAT	T	G	40	PASS	NA	GT	0	0	0	0	0	0	0	0	1	0	0	0	0	0	0	0	0	0	0	0	0	0	0	0	0	0	0	0	0	0	0	0	0	0	0	0	0	0	0	0	0
NC_007530	357300	TATTGAATCA.GATGTTTTGC	G	A	40	PASS	NA	GT	0	0	0	0	0	0	0	0	1	0	0	0	0	0	0	0	0	0	0	0	0	0	0	0	0	0	0	0	0	0	0	0	0	0	0	0	0	0	0	0	0
NC_007530	357340	CCTGGACTTG.TTCCGAAGGT	T	C	40	PASS	NA	GT	0	0	0	0	0	0	0	0	0	0	0	0	0	0	0	0	0	1	0	0	0	0	0	0	0	0	0	0	0	0	0	0	0	0	0	0	0	0	0	0	0
NC_007530	358573	AGACCGACAG.CAGTAAACTT	C	T	40	PASS	NA	GT	0	0	0	0	0	0	0	0	0	0	0	0	0	0	0	0	0	0	0	0	0	0	0	0	0	0	0	0	0	0	0	0	0	0	0	0	0	0	0	0	0
NC_007530	359536	GGTTTAGATT.GTTATGAAAC	G	A	40	PASS	NA	GT	0	1	1	1	1	1	1	1	1	1	1	1	1	1	1	1	1	1	1	1	1	1	1	1	1	1	1	1	1	1	1	1	1	1	1	1	1	1	1	1	1
NC_007530	360289	GTCCGATAAA.GCTAATTCCT	G	T	40	PASS	NA	GT	0	0	1	0	0	0	0	0	0	0	0	0	0	0	0	0	0	0	0	0	0	0	0	0	0	0	0	0	0	0	0	0	0	0	0	0	0	0	0	0	0
NC_007530	360496	AGATCCAATC.GTCTCCCCAA	G	A	40	PASS	NA	GT	0	0	0	0	1	0	0	0	0	0	0	0	0	0	0	0	0	0	0	0	0	0	0	0	0	0	0	0	0	0	0	0	0	0	0	0	0	0	0	0	0
NC_007530	360545	GTCTACTTTC.ATGCGATCTG	A	T	40	PASS	NA	GT	0	0	0	0	0	0	0	0	1	0	0	0	0	0	0	0	0	0	0	0	0	0	0	0	0	0	0	0	0	0	0	0	0	0	0	0	0	0	0	0	0
NC_007530	362375	TCAGGTAATA.CCTCAGTAGA	C	T	40	PASS	NA	GT	0	0	0	0	0	0	0	0	0	0	0	0	0	0	0	0	0	0	0	0	0	0	0	1	0	0	0	0	0	0	0	0	0	0	0	0	0	0	0	0	0
NC_007530	363184	TATTAAAAAT.CTTGAATGTG	C	A	40	PASS	NA	GT	0	0	0	0	0	0	0	0	0	0	0	0	0	0	0	0	0	0	0	0	0	0	0	0	0	0	0	0	0	0	0	0	0	0	0	0	0	0	0	0	0
NC_007530	363195	TTGAATGTGA.GATTTTATAA	G	T	40	PASS	NA	GT	0	0	0	0	0	0	0	0	0	0	0	0	0	0	0	0	0	0	0	0	0	0	0	0	0	0	0	0	0	0	0	0	0	0	0	0	0	0	0	0	0
NC_007530	363723	ACGTTAAAAA.CAAGCACTGG	C	T	40	PASS	NA	GT	0	0	0	0	0	0	0	0	1	0	0	0	0	0	0	0	0	0	0	0	0	0	0	0	0	0	0	0	0	0	0	0	0	0	0	0	0	0	0	0	0
NC_007530	363926	TTGGGCAAAT.GAGTTAGAAC	G	A	40	PASS	NA	GT	0	0	0	0	0	0	0	0	0	0	0	0	0	0	0	0	0	0	0	0	0	0	0	0	0	0	0	0	0	0	0	0	0	0	0	0	0	0	0	0	0
NC_007530	365394	AGCAATTAGT.GGAAGAAATA	G	T	40	PASS	NA	GT	0	0	0	0	0	0	0	0	1	0	0	0	0	0	0	0	0	0	0	0	0	0	0	0	0	0	0	0	0	0	0	0	0	0	0	0	0	0	0	0	0
NC_007530	365409	AAATATTGAA.CGAACCAATT	C	A	40	PASS	NA	GT	0	0	1	0	0	0	0	0	0	0	0	0	0	0	0	0	0	0	0	0	0	0	0	0	0	0	0	0	0	0	0	0	0	0	0	0	0	0	0	0	0
NC_007530	366586	CTGTATTACA.CTAGTAAACT	C	A	40	PASS	NA	GT	0	0	0	0	0	0	0	0	0	1	0	0	0	0	0	0	0	0	0	0	0	0	0	0	0	0	0	0	0	0	0	0	0	0	0	0	0	0	0	0	0
NC_007530	367911	AAAACAAAAA.GATAGGACGT	G	T	40	PASS	NA	GT	0	0	1	0	0	0	0	0	0	0	0	0	0	0	0	0	0	0	0	0	0	0	0	0	0	0	0	0	0	0	0	0	0	0	0	0	0	0	0	0	0
NC_007530	368676	AGTATTTAAT.CCAGCCGAAG	C	A	40	PASS	NA	GT	0	0	0	0	0	0	0	0	1	0	0	0	0	0	0	0	0	0	0	0	0	0	0	0	0	0	0	0	0	0	0	0	0	0	0	0	0	0	0	0	0
NC_007530	369474	GATATGAATG.CATTTATATA	C	T	40	PASS	NA	GT	0	0	0	0	0	0	0	0	0	0	0	0	0	0	0	0	0	0	0	0	0	0	0	0	0	0	0	0	0	0	0	0	0	0	0	0	0	0	0	0	0
NC_007530	370377	GAAAAAGAAA.CGTTTCGTTT	C	A	40	LCB	NA	GT	0	0	0	0	0	0	0	0	0	0	0	0	0	0	0	0	0	0	0	0	0	0	0	0	0	0	0	0	0	0	0	0	0	0	0	0	0	0	0	1	1
NC_007530	370706	TAAGAACAGC.TTCGCCTACA	T	C	40	PASS	NA	GT	0	0	0	0	0	0	0	0	1	1	0	0	0	0	0	0	0	0	1	0	0	0	0	0	0	0	0	0	0	0	0	0	0	0	0	0	0	0	0	0	0
NC_007530	371495	TAATAAATCG.GTTGATGGTG	G	A	40	PASS	NA	GT	0	0	0	0	0	0	0	0	1	0	0	0	0	0	0	0	0	0	0	0	0	0	0	0	0	0	0	0	0	0	0	0	0	0	0	0	0	0	0	0	0
NC_007530	371496	AATAAATCGG.TTGATGGTGT	T	A	40	PASS	NA	GT	0	0	0	0	0	0	0	0	1	0	0	0	0	0	0	0	0	0	0	0	0	0	0	0	0	0	0	0	0	0	0	0	0	0	0	0	0	0	0	0	0
NC_007530	372979	TGTATTGCGT.CCTATTTTGG	C	A	40	PASS	NA	GT	0	0	1	0	0	0	0	0	0	0	0	0	0	0	0	0	0	0	0	0	0	0	0	0	0	0	0	0	0	0	0	0	0	0	0	0	0	0	0	0	0
NC_007530	374186	TTTTTTGGTG.AATATTCAAC	A	C	40	PASS	NA	GT	0	0	0	0	0	0	0	0	1	0	0	0	0	0	0	0	0	0	0	0	0	0	0	0	0	0	0	0	0	0	0	0	0	0	0	0	0	0	0	0	0
NC_007530	374549	ACAAGTTTTG.TAATAGAGTT	T	C	40	PASS	NA	GT	0	0	0	0	0	0	0	0	0	1	0	0	0	0	0	0	0	0	0	0	0	0	0	0	0	0	0	0	0	0	0	0	0	0	0	0	0	0	0	0	0
NC_007530	377068	TATGTTTTGC.TTCACTTGGG	T	G	40	PASS	NA	GT	0	0	0	0	0	0	0	0	1	0	0	0	0	0	0	0	0	0	0	0	0	0	0	0	0	0	0	0	0	0	0	0	0	0	0	0	0	0	0	0	0
NC_007530	380304	AAGTAATGTA.CTTTTACCGG	C	T	40	PASS	NA	GT	0	0	0	0	0	0	0	0	0	0	0	0	0	0	0	0	0	0	0	0	0	0	0	0	0	0	0	0	0	0	0	0	0	0	0	0	0	0	0	0	0
NC_007530	380567	ATAGAAAGAC.CAACTAAATT	C	A	40	PASS	NA	GT	0	0	0	0	0	0	0	0	0	0	0	0	0	0	0	0	0	0	0	0	0	0	0	0	0	0	0	0	0	0	0	0	0	0	0	0	0	0	0	0	0
NC_007530	380809	TGACATTTCT.TCTGCACTTG	T	C	40	PASS	NA	GT	0	0	0	0	0	0	0	0	0	0	0	0	0	0	0	0	0	0	0	0	0	0	0	0	0	0	0	0	0	0	0	0	0	0	0	0	0	0	0	0	0
NC_007530	381331	TTCGGCTATG.CTTTGTACGC	C	G	40	PASS	NA	GT	0	0	0	0	0	0	0	0	1	0	0	0	0	0	0	0	0	0	0	0	0	0	0	0	0	0	0	0	0	0	0	0	0	0	0	0	0	0	0	0	0
NC_007530	381684	TTGATTTAGC.AGTAAATAAG	A	G	40	PASS	NA	GT	0	0	0	0	0	0	0	0	1	1	0	0	0	0	0	0	0	0	1	0	0	0	0	0	0	0	0	0	0	0	0	0	0	0	0	0	0	0	0	0	0
NC_007530	381933	GAGCACGATG.TTTTTTATAG	T	C	40	PASS	NA	GT	0	0	0	0	0	0	0	0	0	1	0	0	0	0	0	0	0	0	0	0	0	0	0	0	0	0	0	0	0	0	0	0	0	0	0	0	0	0	0	0	0
NC_007530	382118	ACATAACTAA.ATTCTTGGTA	A	T	40	PASS	NA	GT	0	0	0	0	0	0	0	0	0	0	0	0	0	1	0	0	0	0	0	0	0	0	0	0	0	0	0	0	0	0	0	0	0	0	0	0	0	0	0	0	0
NC_007530	383010	ACTTGCAGAG.ATTTCTTCTG	A	T	40	PASS	NA	GT	0	0	0	0	0	0	0	0	1	0	0	0	0	0	0	0	0	0	0	0	0	0	0	0	0	0	0	0	0	0	0	0	0	0	0	0	0	0	0	0	0
NC_007530	383701	GGTTCGCAAG.AAGTAGCATG	A	G	40	PASS	NA	GT	0	0	0	0	0	0	0	0	0	0	0	0	0	0	0	0	0	0	0	0	0	0	0	0	0	0	0	0	0	0	0	0	0	0	1	1	0	0	0	0	0
NC_007530	384004	TGATAGTGTT.GCGAAAACGT	G	A	40	PASS	NA	GT	0	1	1	1	1	1	1	1	1	1	1	1	1	1	1	1	1	1	1	1	1	1	1	1	1	1	1	1	1	1	1	1	1	1	1	1	1	1	1	1	1
NC_007530	384032	AATTTCCGAT.GGGATGCAAA	G	T	40	PASS	NA	GT	0	0	0	0	0	0	0	0	1	0	0	0	0	0	0	0	0	0	0	0	0	0	0	0	0	0	0	0	0	0	0	0	0	0	0	0	0	0	0	0	0
NC_007530	384065	TATGAATAAG.ACATGGTGGA	A	T,G	40	PASS	NA	GT	0	0	0	0	0	0	0	0	0	1	0	0	0	0	0	0	0	0	2	0	0	0	0	0	0	0	0	0	0	0	0	0	0	0	0	0	0	0	0	0	0
NC_007530	385194	ATTGAAGATT.ACGATGATGT	A	G	40	PASS	NA	GT	0	0	0	0	0	0	0	0	1	0	0	0	0	0	0	0	0	0	0	0	0	0	0	0	0	0	0	0	0	0	0	0	0	0	0	0	0	0	0	0	0
NC_007530	385624	TAGAACGCAA.ACGTTTGCTT	A	G	40	PASS	NA	GT	0	0	0	0	0	0	0	0	0	0	0	0	0	0	0	0	0	0	0	0	1	0	0	0	0	0	0	0	0	0	0	0	0	0	0	0	0	0	0	0	0
NC_007530	385741	AAATTTCTAT.TGCAAAGTGA	T	C	40	PASS	NA	GT	0	0	0	0	0	0	0	0	0	0	0	0	0	0	0	0	0	0	0	0	0	0	0	0	0	0	0	0	1	0	0	0	0	0	0	0	0	0	0	0	0
NC_007530	388989	CTCTGAAAAG.ATTGCAACGG	A	T	40	PASS	NA	GT	0	0	0	0	0	0	0	0	1	0	0	0	0	0	0	0	0	0	0	0	0	0	0	0	0	0	0	0	0	0	0	0	0	0	0	0	0	0	0	0	0
NC_007530	390285	TAAGGTATTA.GCAGATGTAA	G	T	40	PASS	NA	GT	0	0	0	0	0	0	0	0	1	0	0	0	0	0	0	0	0	0	0	0	0	0	0	0	0	0	0	0	0	0	0	0	0	0	0	0	0	0	0	0	0
NC_007530	390530	CAGCAATTGA.ACGTACGAAA	A	G	40	PASS	NA	GT	0	0	0	0	0	0	0	0	1	0	0	0	0	0	0	0	0	0	0	0	0	0	0	0	0	0	0	0	0	0	0	0	0	0	0	0	0	0	0	0	0
NC_007530	390531	AGCAATTGAA.CGTACGAAAC	C	G	40	PASS	NA	GT	0	0	0	0	0	0	0	0	1	0	0	0	0	0	0	0	0	0	0	0	0	0	0	0	0	0	0	0	0	0	0	0	0	0	0	0	0	0	0	0	0
NC_007530	392106	AAGAATGAAT.TGAATAGTTT	T	C	40	PASS	NA	GT	0	0	0	0	0	0	0	0	0	0	0	0	0	0	0	0	0	0	0	0	0	0	0	0	0	0	0	0	1	0	0	0	0	0	0	0	0	0	0	0	0
NC_007530	394078	CCATCACTAT.AGTTAGGAGA	A	G	40	PASS	NA	GT	0	0	0	0	0	0	0	0	1	0	0	0	0	0	0	0	0	0	0	0	0	0	0	0	0	0	0	0	0	0	0	0	0	0	0	0	0	0	0	0	0
NC_007530	396368	TCTTTTTTCT.CTTCAATCTT	C	T	40	PASS	NA	GT	0	0	0	0	0	0	0	0	0	0	0	0	0	0	0	0	0	0	0	0	0	0	1	0	0	0	0	0	0	0	1	0	0	0	0	0	0	0	0	0	0
NC_007530	396481	AGCGATGAAA.GTAGAAGGGA	G	T	40	PASS	NA	GT	0	0	1	0	0	0	0	0	0	0	0	0	0	0	0	0	0	0	0	0	0	0	0	0	0	0	0	0	0	0	0	0	0	0	0	0	0	0	0	0	0
NC_007530	397408	AATGCTTTTT.CATTGGTCTT	C	T	40	PASS	NA	GT	0	0	0	0	0	0	0	0	0	0	0	0	0	0	0	1	0	0	0	0	0	0	0	0	0	0	0	0	0	0	0	0	0	0	0	0	0	0	0	0	0
NC_007530	397983	AAACATGACA.GTAGTATATG	G	T	40	PASS	NA	GT	0	0	0	0	0	0	0	0	1	0	0	0	0	0	0	0	0	0	0	0	0	0	0	0	0	0	0	0	0	0	0	0	0	0	0	0	0	0	0	0	0
NC_007530	399186	ACAAGATATT.GCTGAATTAG	G	T	40	PASS	NA	GT	0	0	0	0	0	0	0	0	0	0	0	0	0	0	0	0	0	0	0	0	0	0	0	0	0	0	0	0	0	0	0	0	0	0	0	0	0	0	0	0	0
NC_007530	399722	TTGTGTGGAT.GCTGGAGCTG	G	C	40	PASS	NA	GT	0	0	0	0	0	0	0	0	1	0	0	0	0	0	0	0	0	0	0	0	0	0	0	0	0	0	0	0	0	0	0	0	0	0	0	0	0	0	0	0	0
NC_007530	402359	TGGTATAATT.ACTGTTAAAA	A	G	40	PASS	NA	GT	0	0	0	0	0	0	0	0	0	0	0	0	0	0	0	0	0	0	0	0	0	0	0	0	0	0	0	0	0	0	0	0	0	0	0	0	0	0	0	0	0
NC_007530	403907	GAACACGTAT.TAAAACCTAT	T	G	40	PASS	NA	GT	0	0	0	0	0	0	0	0	1	0	0	0	0	0	0	0	0	0	0	0	0	0	0	0	0	0	0	0	0	0	0	0	0	0	0	0	0	0	0	0	0
NC_007530	403908	AACACGTATT.AAAACCTATT	A	G	40	PASS	NA	GT	0	0	0	0	0	0	0	0	1	0	0	0	0	0	0	0	0	0	0	0	0	0	0	0	0	0	0	0	0	0	0	0	0	0	0	0	0	0	0	0	0
NC_007530	404435	GACAATAGAG.GTTAAAGGAA	G	C	40	PASS	NA	GT	0	1	1	1	1	1	1	1	1	1	1	1	1	1	1	1	1	1	1	1	1	1	1	1	1	1	1	1	1	1	1	1	1	1	1	1	1	1	1	1	1
NC_007530	404570	TTAGGAGAGA.GCACCACTCA	G	A	40	PASS	NA	GT	0	0	0	0	0	0	0	0	0	0	0	0	0	0	0	0	0	0	0	0	0	0	0	0	0	0	0	0	0	0	0	0	0	0	0	0	0	0	0	0	0
NC_007530	405960	AAGGAGTAGG.GTGAAGTTTT	G	A	40	PASS	NA	GT	0	0	0	0	0	0	0	0	0	1	0	0	0	0	0	0	0	0	0	0	0	0	0	0	0	0	0	0	0	0	0	0	0	0	0	0	0	0	0	0	0
NC_007530	406424	CATTCCAGCA.AATATCAGCG	A	G	40	PASS	NA	GT	0	0	0	0	0	0	0	0	0	0	0	0	0	0	0	0	0	0	0	0	0	0	0	0	0	0	0	0	0	0	0	0	0	0	0	0	0	0	0	0	0
NC_007530	410655	GAGGAGAACC.AGGATTTAGA	A	T	40	PASS	NA	GT	0	0	0	0	0	0	0	0	1	0	0	0	0	0	0	0	0	0	0	0	0	0	0	0	0	0	0	0	0	0	0	0	0	0	0	0	0	0	0	0	0
NC_007530	410690	AACAAGTGCC.AATGTTACAT	A	C	40	PASS	NA	GT	0	0	0	0	0	0	0	0	1	0	0	0	0	0	0	0	0	0	0	0	0	0	0	0	0	0	0	0	0	0	0	0	0	0	0	0	0	0	0	0	0
NC_007530	410974	TAATAAACAA.TACAATAATA	T	G	40	PASS	NA	GT	0	0	0	0	0	0	0	0	0	0	0	0	0	0	0	0	0	0	0	0	0	0	0	0	0	0	0	0	0	0	0	0	0	0	0	0	0	0	0	0	0
NC_007530	412772	ATCTACTAAA.TTTCCTTTTG	T	G	40	PASS	NA	GT	0	0	0	0	0	0	0	0	0	0	0	0	0	0	0	0	0	0	0	0	0	0	0	0	0	0	0	0	0	0	0	0	0	0	0	0	0	0	0	0	0
NC_007530	413634	TATATATTAC.TATTAATACC	T	C	40	PASS	NA	GT	0	0	0	0	0	0	0	0	0	0	0	0	0	0	0	0	0	0	0	0	0	0	0	1	0	0	0	0	0	0	0	0	0	0	0	0	0	0	0	0	0
NC_007530	413643	CTATTAATAC.CTAGTAATAA	C	T	40	PASS	NA	GT	0	0	0	0	0	0	0	0	0	0	0	0	0	0	0	0	0	0	0	0	0	0	0	0	0	0	0	0	0	0	0	0	0	0	0	0	0	0	0	0	0
NC_007530	413694	TTTTCAGAAA.AGTTAAACAT	A	G	40	PASS	NA	GT	0	0	0	0	0	0	0	0	0	0	0	0	0	0	0	0	0	0	0	0	0	0	0	0	0	0	0	0	0	0	0	0	0	0	0	0	0	0	0	0	0
NC_007530	415797	AAAGCGTATT.AATGCTCTTT	A	G	40	PASS	NA	GT	0	0	0	0	0	0	0	0	1	0	0	0	0	0	0	0	0	0	0	0	0	0	0	0	0	0	0	0	0	0	0	0	0	0	0	0	0	0	0	0	0
NC_007530	418431	AATGGAAGTT.TTCAGCTGTT	T	C	40	PASS	NA	GT	0	0	0	0	0	0	0	0	1	0	0	0	0	0	0	0	0	0	0	0	0	0	0	0	0	0	0	0	0	0	0	0	0	0	0	0	0	0	0	0	0
NC_007530	418624	AATCGTTATG.ACGGACAAAA	A	G	40	PASS	NA	GT	0	1	0	0	0	0	0	1	0	0	1	1	1	1	0	0	0	0	0	0	0	0	0	0	0	0	0	0	0	0	0	0	0	0	0	0	0	1	0	0	0
NC_007530	418635	CGGACAAAAC.GATTTCGATT	G	A	40	PASS	NA	GT	0	0	0	0	0	0	0	0	0	0	0	0	0	0	0	0	0	0	0	0	0	0	0	0	0	0	0	0	0	0	0	0	0	0	0	0	0	0	0	0	0
NC_007530	421092	CTGGGAAACA.ACTTTTACCG	A	G	40	PASS	NA	GT	0	0	0	0	0	0	0	0	0	0	0	0	0	0	1	0	0	0	0	0	0	0	0	0	0	0	0	0	0	0	0	0	0	0	0	0	0	0	0	0	0
NC_007530	421324	TGCACAGGAA.AGTCGTATAT	A	T	40	PASS	NA	GT	0	0	0	0	0	0	0	0	1	0	0	0	0	0	0	0	0	0	0	0	0	0	0	0	0	0	0	0	0	0	0	0	0	0	0	0	0	0	0	0	0
NC_007530	424876	GTAGCTTTCA.TCGTATGTAT	T	C	40	PASS	NA	GT	0	0	0	0	0	0	0	0	1	0	0	0	0	0	0	0	0	0	0	0	0	0	0	0	0	0	0	0	0	0	0	0	0	0	0	0	0	0	0	0	0
NC_007530	425071	CATATTTTCT.AACAATAGAC	A	C	40	PASS	NA	GT	0	0	0	0	0	0	0	0	0	1	0	0	0	0	0	0	0	0	0	0	0	0	0	0	0	0	0	0	0	0	0	0	0	0	0	0	0	0	0	0	0
NC_007530	426433	CTGAATGTTT.CACGTTTCAT	C	G	40	PASS	NA	GT	0	0	0	0	0	0	0	0	1	0	0	0	0	0	0	0	0	0	0	0	0	0	0	0	0	0	0	0	0	0	0	0	0	0	0	0	0	0	0	0	0
NC_007530	426434	TGAATGTTTC.ACGTTTCATA	A	G	40	PASS	NA	GT	0	0	0	0	0	0	0	0	1	0	0	0	0	0	0	0	0	0	0	0	0	0	0	0	0	0	0	0	0	0	0	0	0	0	0	0	0	0	0	0	0
NC_007530	426435	GAATGTTTCA.CGTTTCATAA	C	A	40	PASS	NA	GT	0	0	0	0	0	0	0	0	1	0	0	0	0	0	0	0	0	0	0	0	0	0	0	0	0	0	0	0	0	0	0	0	0	0	0	0	0	0	0	0	0
NC_007530	427984	TTCATTGACC.TTCAAACAGA	T	C	40	PASS	NA	GT	0	0	0	0	0	0	0	0	1	0	0	0	0	0	0	0	0	0	0	0	0	0	0	0	0	0	0	0	0	0	0	0	0	0	0	0	0	0	0	0	0
NC_007530	427985	TCATTGACCT.TCAAACAGAA	T	A	40	PASS	NA	GT	0	0	0	0	0	0	0	0	1	0	0	0	0	0	0	0	0	0	0	0	0	0	0	0	0	0	0	0	0	0	0	0	0	0	0	0	0	0	0	0	0
NC_007530	428681	AATGACTTCT.TGTTCCATAA	T	C	40	PASS	NA	GT	0	0	0	0	0	0	0	0	1	0	0	0	0	0	0	0	0	0	0	0	0	0	0	0	0	0	0	0	0	0	0	0	0	0	0	0	0	0	0	0	0
NC_007530	430076	ACTTTGTGCA.CTTTGAACGA	C	A	40	PASS	NA	GT	0	0	0	0	0	0	0	0	1	0	0	0	0	0	0	0	0	0	0	0	0	0	0	0	0	0	0	0	0	0	0	0	0	0	0	0	0	0	0	0	0
NC_007530	430571	TTCAATACCT.TCTTTTGCTT	T	C	40	PASS	NA	GT	0	0	0	0	0	0	0	0	1	0	0	0	0	0	0	0	0	0	0	0	0	0	0	0	0	0	0	0	0	0	0	0	0	0	0	0	0	0	0	0	0
NC_007530	430591	TTGCATATCC.ACCAACTATA	A	G	40	PASS	NA	GT	0	0	0	0	0	0	0	0	0	0	0	0	0	0	0	0	0	0	0	0	0	0	0	0	0	0	0	0	0	0	0	0	0	0	0	0	0	0	0	0	0
NC_007530	431675	ATTTTTGGTT.CTATCGGACT	C	A	40	PASS	NA	GT	0	0	0	0	0	0	0	0	1	0	0	0	0	0	0	0	0	0	0	0	0	0	0	0	0	0	0	0	0	0	0	0	0	0	0	0	0	0	0	0	0
NC_007530	432033	TACAATGGAA.GAACAGTACT	G	A	40	PASS	NA	GT	0	0	0	0	0	0	0	0	0	0	0	0	0	0	0	0	0	0	0	0	0	0	0	0	0	0	0	0	0	0	0	0	0	0	0	0	0	0	0	0	0
NC_007530	432424	ATTACTTTCG.CCCTTGCTCA	C	T	40	PASS	NA	GT	0	0	0	0	0	0	0	0	0	1	0	0	0	0	0	0	0	0	0	0	0	0	0	0	0	0	0	0	0	0	0	0	0	0	0	0	0	0	0	0	0
NC_007530	435636	TTGTCTGTTT.CAATATGTAA	C	A	40	PASS	NA	GT	0	0	0	0	0	0	0	0	1	0	0	0	0	0	0	0	0	0	0	0	0	0	0	0	0	0	0	0	0	0	0	0	0	0	0	0	0	0	0	0	0
NC_007530	435637	TGTCTGTTTC.AATATGTAAG	A	G	40	PASS	NA	GT	0	0	0	0	0	0	0	0	1	0	0	0	0	0	0	0	0	0	0	0	0	0	0	0	0	0	0	0	0	0	0	0	0	0	0	0	0	0	0	0	0
NC_007530	435956	ATAGTCAGGT.TGAAATGCAA	T	A	40	PASS	NA	GT	0	0	0	0	0	0	0	0	1	0	0	0	0	0	0	0	0	0	0	0	0	0	0	0	0	0	0	0	0	0	0	0	0	0	0	0	0	0	0	0	0
NC_007530	436556	CAAAAAAATA.GGCATATGAA	G	T	40	PASS	NA	GT	0	0	1	0	0	0	0	0	0	0	0	0	0	0	0	0	0	0	0	0	0	0	0	0	0	0	0	0	0	0	0	0	0	0	0	0	0	0	0	0	0
NC_007530	437745	TAACGCCTAC.CATAAATAAT	C	A	40	PASS	NA	GT	0	0	1	0	0	0	0	0	0	0	0	0	0	0	0	0	0	0	0	0	0	0	0	0	0	0	0	0	0	0	0	0	0	0	0	0	0	0	0	0	0
NC_007530	437953	GAAATAATCC.CCACCTTATA	C	T	40	PASS	NA	GT	0	0	0	0	0	0	0	0	0	0	0	0	0	0	0	0	0	0	0	0	0	0	0	0	0	0	0	0	0	0	0	0	0	0	0	0	0	0	0	0	0
NC_007530	437976	TTAATAAGGT.GGGGATTATT	G	C	40	PASS	NA	GT	0	0	0	0	0	0	0	0	0	0	0	0	0	0	0	0	0	0	0	0	0	0	0	0	0	0	0	0	0	0	0	0	0	0	0	0	0	0	0	0	0
NC_007530	437978	AATAAGGTGG.GGATTATTAT	G	A	40	PASS	NA	GT	0	0	0	0	0	0	0	0	0	0	0	0	0	0	0	0	0	0	0	0	0	0	0	0	0	0	0	0	0	0	0	0	0	0	0	0	0	0	0	0	0
NC_007530	438254	AACTTTTCGA.CAAAACAAGC	C	A	40	PASS	NA	GT	0	0	0	0	0	0	0	0	0	0	0	0	0	0	0	0	0	0	0	0	0	0	0	0	0	0	0	0	0	0	0	0	0	0	0	0	0	0	0	0	0
NC_007530	438259	TTCGACAAAA.CAAGCCCACC	C	A	40	PASS	NA	GT	0	0	0	0	0	0	0	0	0	0	0	0	0	0	0	0	0	0	0	0	0	0	0	0	0	0	0	0	0	0	0	0	0	0	0	0	0	0	0	0	0
NC_007530	440668	AATGAAAAAG.GAAAAGTGAC	G	T	40	PASS	NA	GT	0	0	1	0	0	0	0	0	0	0	0	0	0	0	0	0	0	0	0	0	0	0	0	0	0	0	0	0	0	0	0	0	0	0	0	0	0	0	0	0	0
NC_007530	443056	CCATGTGAAT.TAGAAGGACT	T	A	40	PASS	NA	GT	0	0	0	0	0	0	0	0	1	0	0	0	0	0	0	0	0	0	0	0	0	0	0	0	0	0	0	0	0	0	0	0	0	0	0	0	0	0	0	0	0
NC_007530	444080	AATTAGCGAG.CTTTAAAGAG	C	T	40	PASS	NA	GT	0	0	0	0	0	0	0	0	0	0	0	0	0	0	0	0	0	0	0	0	0	0	0	0	0	0	0	0	0	0	0	0	0	0	0	0	0	0	0	0	0
NC_007530	444665	GTGAAGAATT.AACGAGTGTA	A	G	40	PASS	NA	GT	0	0	0	0	0	0	0	0	0	1	0	0	0	0	0	0	0	0	0	0	0	0	0	0	0	0	0	0	0	0	0	0	0	0	0	0	0	0	0	0	0
NC_007530	447304	GTTGAGAACG.TAGTTAAATT	T	C	40	PASS	NA	GT	0	0	1	1	1	1	1	0	0	0	0	0	0	0	0	0	1	0	0	0	0	1	0	0	0	0	0	0	0	0	0	0	0	0	0	0	0	0	0	0	0
NC_007530	448141	TGACAACCCT.TCATCAATTA	T	C	40	PASS	NA	GT	0	0	0	0	1	0	0	0	0	0	0	0	0	0	0	0	0	0	0	0	0	0	0	0	0	0	0	0	0	0	0	0	0	0	0	0	0	0	0	0	0
NC_007530	449090	ATATATATAT.CCATACTTCT	C	G	40	PASS	NA	GT	0	0	0	0	0	0	0	0	0	1	0	0	0	0	0	0	0	0	0	0	0	0	0	0	0	0	0	0	0	0	0	0	0	0	0	0	0	0	0	0	0
NC_007530	449108	CTTAGCCCAT.ACATGTTGTG	A	C	40	PASS	NA	GT	0	0	0	0	0	0	0	0	1	0	0	0	0	0	0	0	0	0	0	0	0	0	0	0	0	0	0	0	0	0	0	0	0	0	0	0	0	0	0	0	0
NC_007530	451584	TCCAAAAATA.CACAAAAGAG	C	T	40	PASS	NA	GT	0	1	1	1	1	1	1	1	1	1	1	1	1	1	1	1	1	1	1	1	1	1	1	1	1	1	1	1	1	1	1	1	1	1	1	1	1	1	1	1	1
NC_007530	451750	CTAACTGAGT.AGTTAGCTTC	A	G	40	PASS	NA	GT	0	0	0	0	0	0	0	0	0	0	0	0	0	0	0	0	0	0	0	0	0	0	0	0	0	0	0	0	0	0	0	0	0	0	0	0	0	0	0	0	0
NC_007530	453154	TTTTGGTGTA.GCAAAATACG	G	T	40	PASS	NA	GT	0	0	0	0	0	0	0	0	0	1	0	0	0	0	0	0	0	0	0	0	0	0	0	0	0	0	0	0	0	0	0	0	0	0	0	0	0	0	0	0	0
NC_007530	453179	ATTCCACGTA.AATATTATCA	A	N	40	N	NA	GT	0	0	0	0	0	0	0	0	0	0	0	0	0	0	0	0	0	0	0	0	0	0	0	0	0	0	0	0	0	0	0	0	0	0	0	0	0	0	0	0	0
NC_007530	456626	GGCAAGTATT.CCGACGCGTA	C	T	40	PASS	NA	GT	0	0	0	0	0	0	0	0	0	0	0	0	0	0	0	0	0	0	0	1	0	0	0	0	0	0	0	0	0	0	0	0	0	0	0	0	0	0	0	0	0
NC_007530	458327	AAAGAAGAAC.TTAATGAGTT	T	A	40	PASS	NA	GT	0	0	0	0	0	0	0	0	1	0	0	0	0	0	0	0	0	0	0	0	0	0	0	0	0	0	0	0	0	0	0	0	0	0	0	0	0	0	0	0	0
NC_007530	458349	GGGAAGAGTA.TGAGATGAAC	T	C	40	PASS	NA	GT	0	0	0	0	0	0	0	0	1	0	0	0	0	0	0	0	0	0	0	0	0	0	0	0	0	0	0	0	0	0	0	0	0	0	0	0	0	0	0	0	0
NC_007530	458350	GGAAGAGTAT.GAGATGAACG	G	T	40	PASS	NA	GT	0	0	0	0	0	0	0	0	1	0	0	0	0	0	0	0	0	0	0	0	0	0	0	0	0	0	0	0	0	0	0	0	0	0	0	0	0	0	0	0	0
NC_007530	459294	CAGAATCAGT.GCGTGAATGT	G	A	40	PASS	NA	GT	0	0	0	0	0	1	0	0	0	0	0	0	0	0	0	0	0	0	0	0	0	0	0	0	0	0	0	0	0	0	0	0	0	0	0	0	0	0	0	0	0
NC_007530	460271	TTAAATTCTG.ATGGTTTGAA	A	C	40	PASS	NA	GT	0	0	0	0	0	0	0	0	1	0	0	0	0	0	0	0	0	0	0	0	0	0	0	0	0	0	0	0	0	0	0	0	0	0	0	0	0	0	0	0	0
NC_007530	460272	TAAATTCTGA.TGGTTTGAAT	T	G	40	PASS	NA	GT	0	0	0	0	0	0	0	0	1	0	0	0	0	0	0	0	0	0	0	0	0	0	0	0	0	0	0	0	0	0	0	0	0	0	0	0	0	0	0	0	0
NC_007530	460273	AAATTCTGAT.GGTTTGAATG	G	A	40	PASS	NA	GT	0	0	0	0	0	0	0	0	1	0	0	0	0	0	0	0	0	0	0	0	0	0	0	0	0	0	0	0	0	0	0	0	0	0	0	0	0	0	0	0	0
NC_007530	460633	ACAAGTACCA.TCGCAAGTTA	T	A	40	PASS	NA	GT	0	0	0	0	0	0	0	0	1	0	0	0	0	0	0	0	0	0	0	0	0	0	0	0	0	0	0	0	0	0	0	0	0	0	0	0	0	0	0	0	0
NC_007530	461417	AGGTAAGAAA.AGCTATTGCT	A	G	40	PASS	NA	GT	0	0	0	0	0	0	0	0	0	0	0	0	0	0	0	0	0	0	0	0	0	0	0	0	0	0	0	0	0	0	0	0	0	0	0	0	0	0	0	0	0
NC_007530	461714	GAGAAGTTAA.GCACACGTGA	G	A	40	PASS	NA	GT	0	0	0	0	0	0	0	0	0	0	0	0	0	0	0	0	0	0	0	0	0	0	1	0	0	0	0	0	0	0	0	0	0	0	0	0	0	0	0	0	0
NC_007530	463730	GGAGGGAGGA.TATATGAATA	T	C	40	PASS	NA	GT	0	0	0	0	0	0	0	0	0	0	0	0	0	0	0	0	0	0	0	0	0	0	0	0	0	0	0	0	0	0	0	0	0	0	0	0	0	0	0	0	0
NC_007530	464105	ATCTCACGTG.ACCCCCCTAC	A	C	40	PASS	NA	GT	0	0	1	0	1	1	1	0	0	0	0	0	0	0	0	0	0	0	0	0	0	0	0	0	0	0	0	0	0	0	0	0	0	0	0	0	0	0	0	0	0
NC_007530	464393	AGCAAGACGT.TATATTGCTA	T	C	40	PASS	NA	GT	0	0	0	0	0	0	0	0	0	0	0	0	0	0	0	0	0	0	0	1	0	0	0	0	0	0	0	0	0	0	0	0	0	0	0	0	0	0	0	0	0
NC_007530	464398	GACGTTATAT.TGCTATGAAT	T	A	40	PASS	NA	GT	0	0	0	0	0	0	0	0	0	0	0	0	0	0	0	0	0	0	0	1	0	0	0	0	0	0	0	0	0	0	0	0	0	0	0	0	0	0	0	0	0
NC_007530	464399	ACGTTATATT.GCTATGAATA	G	T	40	PASS	NA	GT	0	0	0	0	0	0	0	0	0	0	0	0	0	0	0	0	0	0	0	1	0	0	0	0	0	0	0	0	0	0	0	0	0	0	0	0	0	0	0	0	0
NC_007530	464450	CGATTATATA.CCGAAAAAAC	C	A	40	PASS	NA	GT	0	0	0	0	0	0	0	0	0	0	0	0	0	0	0	0	0	0	0	0	0	0	0	0	0	0	0	0	0	0	0	0	0	0	0	0	0	0	0	0	0
NC_007530	464761	TGAGCTATGG.CAAAAAGCAT	C	A	40	PASS	NA	GT	0	0	1	0	0	0	0	0	0	0	0	0	0	0	0	0	0	0	0	0	0	0	0	0	0	0	0	0	0	0	0	0	0	0	0	0	0	0	0	0	0
NC_007530	465410	GGTTTAGGAA.CAATCAAGAA	C	A	40	PASS	NA	GT	0	0	0	0	0	0	0	0	0	0	0	0	0	0	0	0	0	0	0	0	0	0	0	0	0	0	0	0	0	0	0	0	0	0	0	0	0	0	0	0	0
NC_007530	468651	AATATTGTGG.AAGCTATGAC	A	T	40	PASS	NA	GT	0	0	0	0	0	0	0	0	1	0	0	0	0	0	0	0	0	0	0	0	0	0	0	0	0	0	0	0	0	0	0	0	0	0	0	0	0	0	0	0	0
NC_007530	468652	ATATTGTGGA.AGCTATGACA	A	T	40	PASS	NA	GT	0	0	0	0	0	0	0	0	1	0	0	0	0	0	0	0	0	0	0	0	0	0	0	0	0	0	0	0	0	0	0	0	0	0	0	0	0	0	0	0	0
NC_007530	469128	ATTGTGGATG.GTAAAGTAGT	G	T	40	PASS	NA	GT	0	0	0	0	0	0	0	0	1	0	0	0	0	0	0	0	0	0	0	0	0	0	0	0	0	0	0	0	0	0	0	0	0	0	0	0	0	0	0	0	0
NC_007530	470415	AGGTTATCCT.GTGGCTTATT	G	C	40	PASS	NA	GT	0	0	0	0	0	0	0	0	1	0	0	0	0	0	0	0	0	0	0	0	0	0	0	0	0	0	0	0	0	0	0	0	0	0	0	0	0	0	0	0	0
NC_007530	471911	GATAGAGATT.GGTGGAGAAA	G	C	40	PASS	NA	GT	0	0	0	0	0	0	0	0	1	0	0	0	0	0	0	0	0	0	0	0	0	0	0	0	0	0	0	0	0	0	0	0	0	0	0	0	0	0	0	0	0
NC_007530	472330	CGGATGCATT.AGGGAATCGT	A	T	40	PASS	NA	GT	0	0	0	0	0	0	0	0	0	1	0	0	0	0	0	0	0	0	0	0	0	0	0	0	0	0	0	0	0	0	0	0	0	0	0	0	0	0	0	0	0
NC_007530	474108	GAGCGTTTAA.GTGATGAAAT	G	C	40	PASS	NA	GT	0	0	0	0	0	0	0	0	1	0	0	0	0	0	0	0	0	0	0	0	0	0	0	0	0	0	0	0	0	0	0	0	0	0	0	0	0	0	0	0	0
NC_007530	474201	GCGAAAAATC.CACCTGACAG	C	T	40	PASS	NA	GT	0	0	0	0	0	0	0	0	0	0	0	0	0	0	0	0	0	0	0	0	0	0	0	0	0	0	0	0	0	0	0	0	0	0	0	0	0	0	0	0	0
NC_007530	474276	AAAGGTGGAG.AAGAAGGTAA	A	T	40	PASS	NA	GT	0	0	0	0	0	0	0	0	1	0	0	0	0	0	0	0	0	0	0	0	0	0	0	0	0	0	0	0	0	0	0	0	0	0	0	0	0	0	0	0	0
NC_007530	475047	GTATTCTCTG.CTATTGGTAG	C	T	40	PASS	NA	GT	0	0	0	0	1	0	0	0	0	0	0	0	0	0	0	0	0	0	0	0	0	0	0	0	0	0	0	0	0	0	0	0	0	0	0	0	0	0	0	0	0
NC_007530	477179	CAATGTTTAA.ACTAAAGGCA	A	T	40	PASS	NA	GT	0	1	1	1	1	1	1	1	1	1	1	1	1	1	1	1	1	1	1	1	1	1	1	1	1	1	1	1	1	1	1	1	1	1	1	1	1	1	1	1	1
NC_007530	477298	GTCATTAAAA.TTTCTTATGT	T	G	40	PASS	NA	GT	0	0	0	0	0	0	0	0	0	0	0	0	0	0	0	0	0	0	0	0	0	0	0	0	0	0	0	0	0	0	0	0	0	0	0	0	0	0	0	0	0
NC_007530	478952	ACCCAAGAGC.GAATAAAACT	G	A	40	PASS	NA	GT	0	0	0	0	0	0	0	0	0	1	0	0	0	0	0	0	0	0	0	0	0	0	0	0	0	0	0	0	0	0	0	0	0	0	0	0	0	0	0	0	0
NC_007530	479250	TGTTGCGGTT.GATAATTACA	G	C	40	PASS	NA	GT	0	0	0	0	0	0	0	0	1	0	0	0	0	0	0	0	0	0	0	0	0	0	0	0	0	0	0	0	0	0	0	0	0	0	0	0	0	0	0	0	0
NC_007530	479611	ATTGGGCTTG.TATCAACAGG	T	C	40	PASS	NA	GT	0	0	0	0	0	0	0	0	0	0	0	0	0	0	0	0	0	0	0	0	0	0	0	0	0	0	0	0	0	0	0	0	0	0	0	0	0	0	0	0	0
NC_007530	479902	GGAATTGAGC.GATATGGGGA	G	C	40	PASS	NA	GT	0	0	0	0	0	0	0	0	1	0	0	0	0	0	0	0	0	0	0	0	0	0	0	0	0	0	0	0	0	0	0	0	0	0	0	0	0	0	0	0	0
NC_007530	481310	GCAAAAGCGA.TGTTATTAAA	T	A	40	PASS	NA	GT	0	0	0	0	0	0	0	0	1	0	0	0	0	0	0	0	0	0	0	0	0	0	0	0	0	0	0	0	0	0	0	0	0	0	0	0	0	0	0	0	0
NC_007530	482149	GAAGGAGATT.GATAACATAT	G	N	40	N	NA	GT	0	0	0	0	0	0	0	0	0	0	0	0	0	0	0	0	0	0	0	0	0	0	0	0	0	0	0	0	0	0	0	0	0	0	0	0	0	0	0	0	0
NC_007530	482150	AAGGAGATTG.ATAACATATG	A	N	40	N	NA	GT	0	0	0	0	0	0	0	0	0	0	0	0	0	0	0	0	0	0	0	0	0	0	0	0	0	0	0	0	0	0	0	0	0	0	0	0	0	0	0	0	0
NC_007530	483657	CGATATTTGG.CAATATACTG	C	T	40	PASS	NA	GT	0	0	0	0	0	0	0	0	0	0	0	0	0	0	0	0	0	0	0	0	0	0	0	0	0	0	0	0	0	0	0	0	0	0	0	0	0	0	0	0	0
NC_007530	483813	TTTTTCACCT.TATGAAACTC	T	C	40	PASS	NA	GT	0	0	0	0	0	0	0	0	0	0	0	0	0	0	0	0	0	0	0	0	0	0	0	0	0	0	0	0	0	0	0	0	1	1	0	0	0	0	0	0	0
NC_007530	484039	CGGCTTTTTT.ATTGCAAATC	A	G	40	PASS	NA	GT	0	0	0	0	0	0	0	0	0	0	0	0	0	0	0	0	0	0	0	0	0	0	0	0	0	0	0	0	0	0	0	0	0	0	0	0	0	0	0	0	0
NC_007530	484607	TGCAATAGAA.TGCACAACAG	T	G	40	LCB	NA	GT	0	0	0	0	0	0	0	0	1	0	0	0	0	0	0	0	0	0	0	0	0	0	0	0	0	0	0	0	0	0	0	0	0	0	0	0	0	0	0	0	0
NC_007530	485134	ATGCGTAAAT.ACAGCATGCA	A	C	40	PASS	NA	GT	0	0	0	0	0	1	0	0	0	0	0	0	0	0	0	0	0	0	0	0	0	0	0	0	0	0	0	0	0	0	0	0	0	0	0	0	0	0	0	0	0
NC_007530	485145	CAGCATGCAT.GTGAATAAAA	G	T	40	PASS	NA	GT	0	0	1	0	0	0	0	0	0	0	0	0	0	0	0	0	0	0	0	0	0	0	0	0	0	0	0	0	0	0	0	0	0	0	0	0	0	0	0	0	0
NC_007530	486070	GAAGATGAAA.CGCCGTAATA	C	T	40	PASS	NA	GT	0	0	0	0	0	0	0	0	0	0	0	0	0	0	0	0	0	0	0	0	0	0	0	0	0	0	0	0	0	0	0	0	0	0	0	0	0	0	0	0	0
NC_007530	486739	GAATTACCCT.TTTTCCTTCC	T	C	40	PASS	NA	GT	0	0	0	0	0	0	0	0	1	0	0	0	0	0	0	0	0	0	0	0	0	0	0	0	0	0	0	0	0	0	0	0	0	0	0	0	0	0	0	0	0
NC_007530	486916	TAGGGAAAGT.ATCGTTAATC	A	G	40	PASS	NA	GT	0	0	0	0	0	0	0	0	0	0	0	0	0	0	0	0	0	0	0	1	0	0	0	0	0	0	0	0	0	0	0	0	0	0	0	0	0	0	0	0	0
NC_007530	488600	CAGTTTGGCG.TATACTCGTG	T	G	40	PASS	NA	GT	0	0	0	0	0	0	0	0	1	0	0	0	0	0	0	0	0	0	0	0	0	0	0	0	0	0	0	0	0	0	0	0	0	0	0	0	0	0	0	0	0
NC_007530	489898	GGTATGATGC.TGATTTTGCA	T	C	40	PASS	NA	GT	0	0	0	0	0	0	0	0	1	0	0	0	0	0	0	0	0	0	0	0	0	0	0	0	0	0	0	0	0	0	0	0	0	0	0	0	0	0	0	0	0
NC_007530	491282	TTACCATTCA.TAATTCTTGA	T	G	40	PASS	NA	GT	0	0	0	0	0	0	0	0	1	0	0	0	0	0	0	0	0	0	0	0	0	0	0	0	0	0	0	0	0	0	0	0	0	0	0	0	0	0	0	0	0
NC_007530	491283	TACCATTCAT.AATTCTTGAG	A	C	40	PASS	NA	GT	0	0	0	0	0	0	0	0	1	0	0	0	0	0	0	0	0	0	0	0	0	0	0	0	0	0	0	0	0	0	0	0	0	0	0	0	0	0	0	0	0
NC_007530	491395	CTCATTTGGA.TTGTCTTTAG	T	C	40	PASS	NA	GT	0	0	0	0	0	0	0	0	1	0	0	0	0	0	0	0	0	0	0	0	0	0	0	0	0	0	0	0	0	0	0	0	0	0	0	0	0	0	0	0	0
NC_007530	493009	TCAAGAATTT.TAAAACCAGC	T	N	40	N	NA	GT	0	0	0	0	0	0	0	0	0	0	0	0	0	0	0	0	0	0	0	0	0	0	0	0	0	0	0	0	0	0	0	0	0	0	0	0	0	0	0	0	0
NC_007530	493674	AAGTGCAAGT.GCAAGTGTAA	G	T	40	PASS	NA	GT	0	0	1	0	0	0	0	0	0	0	0	0	0	0	0	0	0	0	0	0	0	0	0	0	0	0	0	0	0	0	0	0	0	0	0	0	0	0	0	0	0
NC_007530	494234	GTTTCTACAA.CGTATTGGTA	C	T	40	PASS	NA	GT	0	0	0	0	0	0	0	0	0	0	0	0	0	0	0	0	0	0	0	1	0	0	0	0	0	0	0	0	0	0	0	0	0	0	0	0	0	0	0	0	0
NC_007530	494651	TGCAGGGGTT.GTTGCGGGAT	G	C	40	PASS	NA	GT	0	0	0	0	0	0	0	0	0	1	0	0	0	0	0	0	0	0	0	0	0	0	0	0	0	0	0	0	0	0	0	0	0	0	0	0	0	0	0	0	0
NC_007530	498458	TTGAAAAACT.GGGGTGGTGG	G	T	40	PASS	NA	GT	0	0	1	0	0	0	0	0	0	0	0	0	0	0	0	0	0	0	0	0	0	0	0	0	0	0	0	0	0	0	0	0	0	0	0	0	0	0	0	0	0
NC_007530	500018	ATAGTCAATA.TTCAGTTCAA	T	G	40	PASS	NA	GT	0	0	0	0	0	1	0	0	0	0	0	0	0	0	0	0	0	0	0	0	0	0	0	0	0	0	0	0	0	0	0	0	0	0	0	0	0	0	0	0	0
NC_007530	500376	AATGAGTCAA.TTGATTGAAG	T	A	40	PASS	NA	GT	0	0	0	0	0	0	0	0	1	0	0	0	0	0	0	0	0	0	0	0	0	0	0	0	0	0	0	0	0	0	0	0	0	0	0	0	0	0	0	0	0
NC_007530	500463	ACCTGCAACG.GTTTTAATTG	G	T	40	PASS	NA	GT	0	0	1	0	0	0	0	0	0	0	0	0	0	0	0	0	0	0	0	0	0	0	0	0	0	0	0	0	0	0	0	0	0	0	0	0	0	0	0	0	0
NC_007530	502697	TTGTATATAA.AGAAGCACTT	A	G	40	PASS	NA	GT	0	0	0	0	0	0	0	0	1	0	0	0	0	0	0	0	0	0	0	0	0	0	0	0	0	0	0	0	0	0	0	0	0	0	0	0	0	0	0	0	0
NC_007530	504482	CTTTAACAGA.AGAAGACGTA	A	C	40	PASS	NA	GT	0	0	0	0	0	0	0	0	1	0	0	0	0	0	0	0	0	0	0	0	0	0	0	0	0	0	0	0	0	0	0	0	0	0	0	0	0	0	0	0	0
NC_007530	504979	TATGCACCGA.TTACTTCTGA	T	C	40	PASS	NA	GT	0	0	0	0	0	0	0	0	1	0	0	0	0	0	0	0	0	0	0	0	0	0	0	0	0	0	0	0	0	0	0	0	0	0	0	0	0	0	0	0	0
NC_007530	504982	GCACCGATTA.CTTCTGAAGT	C	T	40	PASS	NA	GT	0	0	0	0	0	0	0	0	0	0	0	0	0	0	0	0	0	0	0	0	0	0	0	0	0	0	0	0	1	0	0	0	0	0	0	0	0	0	0	0	0
NC_007530	506057	AGATCGGTAA.AGGAAAAGAA	A	C	40	PASS	NA	GT	0	0	0	0	0	0	0	0	1	0	0	0	0	0	0	0	0	0	0	0	0	0	0	0	0	0	0	0	0	0	0	0	0	0	0	0	0	0	0	0	0
NC_007530	507029	TCGTATATGC.AATATGGAGA	A	G	40	LCB	NA	GT	0	0	0	0	0	0	0	0	0	0	0	0	0	0	0	0	0	0	0	0	1	0	0	0	0	0	0	0	0	0	0	0	0	0	0	0	0	0	0	0	0
NC_007530	507034	TATGCAATAT.GGAGAAACAA	G	A	40	LCB	NA	GT	0	0	0	0	0	0	0	0	0	0	0	0	0	0	0	0	0	0	0	0	0	0	0	0	0	0	0	0	0	0	0	0	0	0	0	0	0	0	0	0	0
NC_007530	507325	AGCATCTTGG.TATGCGAATT	T	C	40	PASS	NA	GT	0	0	0	0	0	0	0	0	0	1	0	0	0	0	0	0	0	0	0	0	0	0	0	0	0	0	0	0	0	0	0	0	0	0	0	0	0	0	0	0	0
NC_007530	507652	TAATAAATAT.CAGTTATGTA	C	T	40	PASS	NA	GT	0	0	0	0	0	0	0	0	0	0	0	0	0	0	0	0	0	0	0	0	0	0	0	0	0	0	0	0	0	0	0	0	0	0	0	0	0	0	0	0	0
NC_007530	508438	GGTTTGGTGA.ATTTATGCAC	A	G	40	PASS	NA	GT	0	0	0	0	0	0	0	0	0	1	0	0	0	0	0	0	0	0	0	0	0	0	0	0	0	0	0	0	0	0	0	0	0	0	0	0	0	0	0	0	0
NC_007530	508461	TCCATAAATT.ATGTGGATAA	A	T	40	PASS	NA	GT	0	0	0	0	0	0	0	0	0	0	0	0	0	0	0	0	0	0	0	0	0	0	0	0	0	0	0	0	0	0	0	0	0	0	0	0	0	0	0	0	0
NC_007530	508468	ATTATGTGGA.TAACGTTATC	T	A	40	PASS	NA	GT	0	0	0	0	0	0	0	0	0	0	0	0	0	0	0	0	0	0	0	0	0	0	0	0	0	0	0	0	0	0	0	0	0	0	0	0	0	0	0	0	0
NC_007530	508479	AACGTTATCC.ACATAAAAAA	A	T	40	PASS	NA	GT	0	0	0	0	0	0	0	0	0	0	0	0	0	0	0	0	0	0	0	0	0	0	0	0	0	0	0	0	0	0	0	0	0	0	0	0	0	0	0	0	0
NC_007530	508482	GTTATCCACA.TAAAAAAAGG	T	A	40	PASS	NA	GT	0	0	0	0	0	0	0	0	0	0	0	0	0	0	0	0	0	0	0	0	0	0	0	0	0	0	0	0	0	0	0	0	0	0	0	0	0	0	0	0	0
NC_007530	511062	ACAGGTAACC.AATGAGGTTT	A	G	40	PASS	NA	GT	0	0	0	0	0	0	0	0	0	0	0	0	0	0	0	0	0	0	0	0	0	0	0	0	0	0	0	0	0	0	0	0	0	0	0	0	0	0	0	0	0
NC_007530	511111	ATCCCTTCAT.TCTTATAGGC	T	G	40	PASS	NA	GT	0	0	0	0	0	0	0	0	0	0	0	0	0	0	0	0	0	0	0	0	0	0	0	0	0	0	0	0	0	0	0	0	0	0	0	0	0	0	0	0	0
NC_007530	511944	ATATTTATAT.CGATAAAGGT	C	T	40	PASS	NA	GT	0	0	0	0	0	0	0	0	0	0	0	0	0	0	0	0	0	0	0	0	0	0	0	0	0	0	0	0	0	0	0	0	0	0	0	0	0	0	0	0	0
NC_007530	512064	TGTACAATGA.AGAGGTACAA	A	T	40	PASS	NA	GT	0	0	0	0	0	0	0	0	1	0	0	0	0	0	0	0	0	0	0	0	0	0	0	0	0	0	0	0	0	0	0	0	0	0	0	0	0	0	0	0	0
NC_007530	513468	TCATCAGTTG.ATACCTCTTG	A	G	40	PASS	NA	GT	0	1	0	0	0	0	0	1	0	0	1	1	1	1	0	0	0	0	0	0	0	0	0	0	0	0	0	0	0	0	0	0	0	0	0	0	0	1	0	0	0
NC_007530	515111	TTTGGGTTTC.GGAAATTATG	G	A	40	PASS	NA	GT	0	1	1	1	1	1	1	1	1	1	1	1	1	1	1	1	1	1	1	1	1	1	1	1	1	1	1	1	1	1	1	1	1	1	1	1	1	1	1	1	1
NC_007530	515738	ATGGTCGTTA.CGTCATTAAT	C	G	40	PASS	NA	GT	0	0	0	0	0	0	0	0	0	1	0	0	0	0	0	0	0	0	0	0	0	0	0	0	0	0	0	0	0	0	0	0	0	0	0	0	0	0	0	0	0
NC_007530	516630	TGGTGCTAGC.ATTCAAAGCA	A	G	40	PASS	NA	GT	0	0	0	0	0	0	0	0	0	0	0	0	0	0	0	0	0	0	0	0	0	0	0	1	0	0	0	0	0	0	0	0	0	0	0	0	0	0	0	0	0
NC_007530	517434	GGGAGCATAT.ATGGGATTTC	A	T	40	PASS	NA	GT	0	0	0	0	0	0	0	0	0	1	0	0	0	0	0	0	0	0	0	0	0	0	0	0	0	0	0	0	0	0	0	0	0	0	0	0	0	0	0	0	0
NC_007530	519184	AGTTTAATTC.CTCGTTTCTA	C	T	40	PASS	NA	GT	0	0	0	0	0	0	0	0	0	0	0	0	0	0	1	0	0	0	0	0	0	0	0	0	0	0	0	0	0	0	0	0	0	0	0	0	0	0	0	0	0
NC_007530	519537	TGAAGCGACT.CCCGCTTTAG	C	T	40	PASS	NA	GT	0	1	1	1	1	1	1	1	1	1	1	1	1	1	1	1	1	1	1	1	1	1	1	1	1	1	1	1	1	1	1	1	1	1	1	1	1	1	1	1	1
NC_007530	519882	TCTAAATGCT.CTACTTCTTC	C	A	40	PASS	NA	GT	0	0	1	0	0	0	0	0	0	0	0	0	0	0	0	0	0	0	0	0	0	0	0	0	0	0	0	0	0	0	0	0	0	0	0	0	0	0	0	0	0
NC_007530	520023	ACTTCATCAA.GCATTTCAAC	G	T	40	PASS	NA	GT	0	0	1	0	0	0	0	0	0	0	0	0	0	0	0	0	0	0	0	0	0	0	0	0	0	0	0	0	0	0	0	0	0	0	0	0	0	0	0	0	0
NC_007530	520626	AGAGCAATTA.CTAATATACA	C	A	40	PASS	NA	GT	0	0	0	0	0	0	0	0	0	0	0	0	0	0	0	0	0	0	0	0	0	0	0	0	0	0	0	0	0	0	0	0	0	0	0	0	0	0	0	0	0
NC_007530	520865	TTTTAAAATG.CGAGCACCAA	C	A	40	PASS	NA	GT	0	0	1	0	0	0	0	0	0	0	0	0	0	0	0	0	0	0	0	0	0	0	0	0	0	0	0	0	0	0	0	0	0	0	0	0	0	0	0	0	0
NC_007530	521505	AAGCAAAACC.TTTAATATTA	T	C	40	PASS	NA	GT	0	0	0	0	0	0	0	0	1	0	0	0	0	0	0	0	0	0	0	0	0	0	0	0	0	0	0	0	0	0	0	0	0	0	0	0	0	0	0	0	0
NC_007530	521513	CCTTTAATAT.TAGAGTATGC	T	G	40	PASS	NA	GT	0	0	0	0	0	0	0	0	1	0	0	0	0	0	0	0	0	0	0	0	0	0	0	0	0	0	0	0	0	0	0	0	0	0	0	0	0	0	0	0	0
NC_007530	521547	GCTCTTTTTC.ACGGAGTGGC	A	G	40	PASS	NA	GT	0	0	0	0	1	0	0	0	0	0	0	0	0	0	0	0	0	0	0	0	0	0	0	0	0	0	0	0	0	0	0	0	0	0	0	0	0	0	0	0	0
NC_007530	521930	CCCATAACGC.GTTGCTCTAC	G	T	40	PASS	NA	GT	0	0	1	0	0	0	0	0	0	0	0	0	0	0	0	0	0	0	0	0	0	0	0	0	0	0	0	0	0	0	0	0	0	0	0	0	0	0	0	0	0
NC_007530	521939	CGTTGCTCTA.CACCAACGCC	C	G	40	PASS	NA	GT	0	0	0	0	0	0	0	0	1	0	0	0	0	0	0	0	0	0	0	0	0	0	0	0	0	0	0	0	0	0	0	0	0	0	0	0	0	0	0	0	0
NC_007530	522212	CTTTCTAGTT.CGCGTGGGAC	C	T	40	PASS	NA	GT	0	0	0	0	1	1	0	0	0	0	0	0	0	0	0	0	0	0	0	0	0	0	0	0	0	0	0	0	0	0	0	0	0	0	0	0	0	0	0	0	0
NC_007530	522599	ATGCCAACAG.CAATTGTTCC	C	A	40	PASS	NA	GT	0	0	0	0	0	0	0	0	0	1	0	0	0	0	0	0	0	0	0	0	0	0	0	0	0	0	0	0	0	0	0	0	0	0	0	0	0	0	0	0	0
NC_007530	523182	TTAACTTGTC.ACGGTAATCA	A	C	40	PASS	NA	GT	0	0	0	0	0	0	0	0	1	0	0	0	0	0	0	0	0	0	0	0	0	0	0	0	0	0	0	0	0	0	0	0	0	0	0	0	0	0	0	0	0
NC_007530	523556	GGATTAATAC.TATCTGCTCC	T	C	40	PASS	NA	GT	0	0	1	0	0	0	0	0	0	0	0	0	0	0	0	0	0	0	0	0	0	0	0	0	0	0	0	0	0	0	0	0	0	0	0	0	0	0	0	0	0
NC_007530	524460	CATATTCAGT.TGGTGATACA	T	A	40	PASS	NA	GT	0	0	0	0	0	0	0	0	1	0	0	0	0	0	0	0	0	0	0	0	0	0	0	0	0	0	0	0	0	0	0	0	0	0	0	0	0	0	0	0	0
NC_007530	525140	AATAAAGGTT.CTTCTTGTTT	C	A	40	PASS	NA	GT	0	0	1	0	0	0	0	0	0	0	0	0	0	0	0	0	0	0	0	0	0	0	0	0	0	0	0	0	0	0	0	0	0	0	0	0	0	0	0	0	0
NC_007530	527031	CCAACGATAT.GTTCTAAAGC	G	T	40	PASS	NA	GT	0	0	0	0	0	0	0	0	1	0	0	0	0	0	0	0	0	0	0	0	0	0	0	0	0	0	0	0	0	0	0	0	0	0	0	0	0	0	0	0	0
NC_007530	528413	CGTGGATGGC.ACGTGCCTTT	A	C	40	PASS	NA	GT	0	0	0	0	0	0	0	0	0	0	0	0	0	0	0	0	0	0	0	0	0	0	0	0	0	0	0	0	0	0	0	0	0	0	0	0	0	0	0	0	0
NC_007530	528416	GGATGGCACG.TGCCTTTTAT	T	G	40	PASS	NA	GT	0	0	0	0	0	0	0	0	0	0	0	0	0	0	0	0	0	0	0	0	0	0	0	0	0	0	0	0	0	0	0	0	0	0	0	0	0	0	0	0	0
NC_007530	529686	AAACAGAGTG.GAATAGCTAT	G	C	40	PASS	NA	GT	0	0	0	0	0	0	0	0	1	0	0	0	0	0	0	0	0	0	0	0	0	0	0	0	0	0	0	0	0	0	0	0	0	0	0	0	0	0	0	0	0
NC_007530	529775	AAAAGGTACC.GTGGTGCTGG	G	C	40	PASS	NA	GT	0	0	0	0	0	0	0	0	1	0	0	0	0	0	0	0	0	0	0	0	0	0	0	0	0	0	0	0	0	0	0	0	0	0	0	0	0	0	0	0	0
NC_007530	530802	TAGAAGTAAG.GCGAGTGTCT	G	C	40	PASS	NA	GT	0	0	0	0	0	0	0	0	1	0	0	0	0	0	0	0	0	0	0	0	0	0	0	0	0	0	0	0	0	0	0	0	0	0	0	0	0	0	0	0	0
NC_007530	530848	GTGAAGTGTA.GGGCATACCT	G	A	40	PASS	NA	GT	0	0	0	0	0	0	0	0	1	0	0	0	0	0	0	0	0	0	0	0	0	0	0	0	0	0	0	0	0	0	0	0	0	0	0	0	0	0	0	0	0
NC_007530	531626	GTGATTTCTT.AACCAAGAAA	A	G	40	PASS	NA	GT	0	0	0	0	0	1	0	0	0	0	0	0	0	0	0	0	0	0	0	0	0	0	0	0	0	0	0	0	0	0	0	0	0	0	0	0	0	0	0	0	0
NC_007530	531627	TGATTTCTTA.ACCAAGAAAT	A	G	40	PASS	NA	GT	0	0	0	0	0	1	0	0	0	0	0	0	0	0	0	0	0	0	0	0	0	0	0	0	0	0	0	0	0	0	0	0	0	0	0	0	0	0	0	0	0
NC_007530	531628	GATTTCTTAA.CCAAGAAATC	C	T	40	PASS	NA	GT	0	0	0	0	0	1	0	0	0	0	0	0	0	0	0	0	0	0	0	0	0	0	0	0	0	0	0	0	0	0	0	0	0	0	0	0	0	0	0	0	0
NC_007530	531629	ATTTCTTAAC.CAAGAAATCA	C	T	40	PASS	NA	GT	0	0	0	0	0	1	0	0	0	0	0	0	0	0	0	0	0	0	0	0	0	0	0	0	0	0	0	0	0	0	0	0	0	0	0	0	0	0	0	0	0
NC_007530	531917	AAGCCAACCA.TCATAAATGT	T	G	40	PASS	NA	GT	0	0	0	0	0	0	0	0	1	0	0	0	0	0	0	0	0	0	0	0	0	0	0	0	0	0	0	0	0	0	0	0	0	0	0	0	0	0	0	0	0
NC_007530	539892	TGGGTGTAAA.CGGTTCTGTA	C	T	40	PASS	NA	GT	0	0	0	0	0	0	0	0	0	0	0	0	0	0	0	0	0	0	0	0	0	0	1	0	0	0	0	0	0	0	1	0	0	0	0	0	0	0	0	0	0
NC_007530	540896	TCACTACTCT.TTTTTGTATA	T	C	40	PASS	NA	GT	0	0	0	0	0	0	0	0	0	0	0	0	0	0	0	0	0	0	0	0	0	0	0	0	0	0	0	0	0	0	0	0	0	0	0	0	0	0	0	0	0
NC_007530	541437	TATTATTATT.GTTAAGTTTT	G	T	40	PASS	NA	GT	0	0	0	0	0	0	0	0	0	0	0	0	0	1	0	0	0	0	0	0	0	0	0	0	0	0	0	0	0	0	0	0	0	0	0	0	0	0	0	0	0
NC_007530	542127	GGAAGTTCCT.ACATAGGAGC	A	T	40	PASS	NA	GT	0	0	0	0	0	0	0	0	0	1	0	0	0	0	0	0	0	0	0	0	0	0	0	0	0	0	0	0	0	0	0	0	0	0	0	0	0	0	0	0	0
NC_007530	546955	GTACAAATAA.GTTAAATGAT	G	T	40	PASS	NA	GT	0	0	0	0	0	0	0	0	0	0	0	0	0	1	0	0	0	0	0	0	0	0	0	0	0	0	0	0	0	0	0	0	0	0	0	0	0	0	0	0	0
NC_007530	547000	CGTTTATCTT.TATAGATTTA	T	A	40	PASS	NA	GT	0	0	0	0	0	0	0	0	0	0	0	0	0	1	0	0	0	0	0	0	0	0	0	0	0	0	0	0	0	0	0	0	0	0	0	0	0	0	0	0	0
NC_007530	550664	GTGAAAATGT.GTGCAACAAT	G	C	40	PASS	NA	GT	0	0	0	0	0	0	0	0	0	1	0	0	0	0	0	0	0	0	0	0	0	0	0	0	0	0	0	0	0	0	0	0	0	0	0	0	0	0	0	0	0
NC_007530	551041	AGAAGAAAGC.ATTGTTATGT	A	G	40	PASS	NA	GT	0	0	0	0	0	0	0	0	0	0	0	0	0	0	0	0	0	0	0	0	0	0	0	0	0	0	0	0	0	0	0	0	0	0	0	0	0	0	0	0	0
NC_007530	551287	TTTAGAATTA.GAGCAAGCAT	G	C	40	PASS	NA	GT	0	0	0	0	0	0	0	0	1	0	0	0	0	0	0	0	0	0	0	0	0	0	0	0	0	0	0	0	0	0	0	0	0	0	0	0	0	0	0	0	0
NC_007530	551400	GATTATGGGG.TAACATCGAT	T	C	40	PASS	NA	GT	0	1	1	1	1	1	1	1	1	1	1	1	1	1	1	1	1	1	1	1	1	1	1	1	1	1	1	1	1	1	1	1	1	1	1	1	1	1	1	1	1
NC_007530	554342	CATTAGCTAG.CTTAAAAAAC	C	T	40	PASS	NA	GT	0	0	0	0	0	0	0	0	0	0	0	0	0	0	0	0	0	0	0	0	0	0	0	0	0	0	0	0	0	0	0	0	0	0	0	0	0	0	0	0	0
NC_007530	556142	TATTATGAAG.GAAATGAAAT	G	T	40	PASS	NA	GT	0	0	1	0	0	0	0	0	0	0	0	0	0	0	0	0	0	0	0	0	0	0	0	0	0	0	0	0	0	0	0	0	0	0	0	0	0	0	0	0	0
NC_007530	556525	TTACTTTTTT.CCTCATTCAT	C	T	40	PASS	NA	GT	0	0	0	0	0	0	0	0	0	0	0	0	0	0	0	0	0	0	0	0	0	0	0	0	0	0	0	0	0	0	0	0	0	0	0	0	0	0	0	1	1
NC_007530	557382	GCCTGTTTGT.GCACTTGTTA	G	T	40	PASS	NA	GT	0	0	1	0	0	0	0	0	0	0	0	0	0	0	0	0	0	0	0	0	0	0	0	0	0	0	0	0	0	0	0	0	0	0	0	0	0	0	0	0	0
NC_007530	559387	AGTAATCCAA.ATAAAGGTTT	A	G	40	PASS	NA	GT	0	0	0	0	0	0	0	0	0	1	0	0	0	0	0	0	0	0	0	0	0	0	0	0	0	0	0	0	0	0	0	0	0	0	0	0	0	0	0	0	0
NC_007530	561194	ATCATATAGA.GGCAAACTTT	G	T	40	PASS	NA	GT	0	0	0	0	0	0	0	0	0	1	0	0	0	0	0	0	0	0	0	0	0	0	0	0	0	0	0	0	0	0	0	0	0	0	0	0	0	0	0	0	0
NC_007530	562767	ACGTATTGAA.AAAGCTCGTG	A	C	40	PASS	NA	GT	0	0	0	0	0	0	0	0	0	0	0	0	0	0	0	0	0	0	0	0	0	0	0	0	0	0	0	0	0	0	0	0	0	0	0	0	0	0	0	0	0
NC_007530	563316	GAAACAAAAA.ATTGCAGAGG	A	T	40	PASS	NA	GT	0	0	0	0	0	0	0	0	0	1	0	0	0	0	0	0	0	0	0	0	0	0	0	0	0	0	0	0	0	0	0	0	0	0	0	0	0	0	0	0	0
NC_007530	563679	ATAGTATAGT.GAATGGAGCC	G	A	40	PASS	NA	GT	0	0	0	0	0	0	0	0	1	0	0	0	0	0	0	0	0	0	0	0	0	0	0	0	0	0	0	0	0	0	0	0	0	0	0	0	0	0	0	0	0
NC_007530	563844	TCTTAATCGT.ATAATTTATA	A	G	40	LCB	NA	GT	0	0	0	0	0	1	0	0	0	0	0	0	0	0	0	0	0	0	0	0	0	0	0	0	0	0	0	0	0	0	0	0	0	0	0	0	0	0	0	0	0
NC_007530	565226	TGAAGATGGT.GGGAAGTTAG	G	A	40	PASS	NA	GT	0	0	0	0	0	0	0	0	0	0	0	0	0	0	0	0	0	0	0	0	0	0	0	0	0	0	0	0	0	0	0	0	0	0	0	0	0	0	0	1	1
NC_007530	565519	TGAAAGAAAT.CCAATTTGAT	C	A	40	PASS	NA	GT	0	0	1	0	0	0	0	0	0	0	0	0	0	0	0	0	0	0	0	0	0	0	0	0	0	0	0	0	0	0	0	0	0	0	0	0	0	0	0	0	0
NC_007530	567165	TCAAGATTTT.GTTCAATTTA	G	A	40	PASS	NA	GT	0	0	0	0	0	0	0	0	0	0	0	0	0	0	0	0	0	0	0	0	0	0	0	0	0	0	0	0	0	0	0	0	0	0	0	0	0	0	0	0	0
NC_007530	567240	TAGAGCAAGA.GAGTTGAAGA	G	T	40	PASS	NA	GT	0	0	0	0	0	0	0	0	1	0	0	0	0	0	0	0	0	0	0	0	0	0	0	0	0	0	0	0	0	0	0	0	0	0	0	0	0	0	0	0	0
NC_007530	567241	AGAGCAAGAG.AGTTGAAGAT	A	G	40	PASS	NA	GT	0	0	0	0	0	0	0	0	1	0	0	0	0	0	0	0	0	0	0	0	0	0	0	0	0	0	0	0	0	0	0	0	0	0	0	0	0	0	0	0	0
NC_007530	567265	TTTATGCTAG.ATAGAGAGAG	A	T	40	PASS	NA	GT	0	0	0	0	0	0	0	0	1	0	0	0	0	0	0	0	0	0	0	0	0	0	0	0	0	0	0	0	0	0	0	0	0	0	0	0	0	0	0	0	0
NC_007530	567417	TGATATCGGA.GAAGAAATAG	G	T	40	LCB	NA	GT	0	0	0	0	0	0	0	0	1	0	0	0	0	0	0	0	0	0	0	0	0	0	0	0	0	0	0	0	0	0	0	0	0	0	0	0	0	0	0	0	0
NC_007530	567824	AGACGTGTAC.TTACCTGATA	T	C	40	PASS	NA	GT	0	0	0	0	0	0	0	0	1	0	0	0	0	0	0	0	0	0	0	0	0	0	0	0	0	0	0	0	0	0	0	0	0	0	0	0	0	0	0	0	0
NC_007530	569074	ACATCCATAA.TTCCTAAACG	T	A	40	PASS	NA	GT	0	0	0	0	0	0	0	0	0	1	0	0	0	0	0	0	0	0	0	0	0	0	0	0	0	0	0	0	0	0	0	0	0	0	0	0	0	0	0	0	0
NC_007530	569707	CCTTAAAAAT.GATTACGCTT	G	A	40	PASS	NA	GT	0	0	0	0	0	0	0	0	0	0	0	0	0	0	0	0	0	0	0	0	0	0	0	0	0	0	0	0	0	0	0	0	0	0	0	0	0	0	0	0	0
NC_007530	570588	AAAATTTGTT.CGAGATTATG	C	A	40	PASS	NA	GT	0	0	0	0	0	0	0	0	0	1	0	0	0	0	0	0	0	0	0	0	0	0	0	0	0	0	0	0	0	0	0	0	0	0	0	0	0	0	0	0	0
NC_007530	570595	GTTCGAGATT.ATGATTCGAA	A	C	40	PASS	NA	GT	0	0	0	0	0	0	0	0	0	1	0	0	0	0	0	0	0	0	0	0	0	0	0	0	0	0	0	0	0	0	0	0	0	0	0	0	0	0	0	0	0
NC_007530	570596	TTCGAGATTA.TGATTCGAAA	T	A	40	PASS	NA	GT	0	0	0	0	0	0	0	0	0	1	0	0	0	0	0	0	0	0	0	0	0	0	0	0	0	0	0	0	0	0	0	0	0	0	0	0	0	0	0	0	0
NC_007530	571123	TGGATAAATG.CACTCAAGAA	C	T	40	PASS	NA	GT	0	1	1	1	1	1	1	1	1	1	1	1	1	1	1	1	1	1	1	1	1	1	1	1	1	1	1	1	1	1	1	1	1	1	1	1	1	1	1	1	1
NC_007530	571317	AGAAACAAGA.GAAGCATAAA	G	C	40	PASS	NA	GT	0	0	0	0	0	0	0	0	0	1	0	0	0	0	0	0	0	0	0	0	0	0	0	0	0	0	0	0	0	0	0	0	0	0	0	0	0	0	0	0	0
NC_007530	571342	GGAAGAATCT.AAAGAAGAAA	A	T	40	PASS	NA	GT	0	0	0	0	0	0	0	0	0	1	0	0	0	0	0	0	0	0	0	0	0	0	0	0	0	0	0	0	0	0	0	0	0	0	0	0	0	0	0	0	0
NC_007530	572234	ACAACCTTAA.TTATAGAATA	T	G	40	PASS	NA	GT	0	0	0	0	0	0	0	0	0	0	0	0	0	0	0	0	0	0	0	0	0	0	0	0	0	0	0	0	0	0	0	0	0	0	0	0	0	0	0	0	0
NC_007530	573531	ACAAAGACAG.CGTGTTGCGC	C	T	40	PASS	NA	GT	0	0	0	0	0	1	0	0	0	0	0	0	0	0	0	0	0	0	0	0	0	0	0	0	0	0	0	0	0	0	0	0	0	0	0	0	0	0	0	0	0
NC_007530	575349	ATTTATACAA.CAGCTTAGTT	C	A	40	PASS	NA	GT	0	1	0	0	0	0	0	1	0	0	1	1	1	1	0	0	0	0	0	0	0	0	0	0	0	0	0	0	0	0	0	0	0	0	0	0	0	1	0	0	0
NC_007530	575846	GTTGCAACTG.ATTGGGGAAG	A	T	40	PASS	NA	GT	0	0	0	0	0	0	0	0	1	0	0	0	0	0	0	0	0	0	0	0	0	0	0	0	0	0	0	0	0	0	0	0	0	0	0	0	0	0	0	0	0
NC_007530	576039	CATTATCTAG.TGCTGCTTGT	T	C	40	PASS	NA	GT	0	0	0	0	0	0	0	0	0	0	0	0	0	0	0	0	0	0	0	0	0	0	0	0	0	0	0	0	0	0	1	0	0	0	0	0	0	0	0	0	0
NC_007530	578248	TTTCTGAATG.TGAACCATAT	T	G	40	PASS	NA	GT	0	0	0	0	0	0	0	0	0	1	0	0	0	0	0	0	0	0	0	0	0	0	0	0	0	0	0	0	0	0	0	0	0	0	0	0	0	0	0	0	0
NC_007530	578682	TTGTCCAAAT.ATTATGCGAT	A	T	40	PASS	NA	GT	0	0	0	0	0	0	0	0	1	0	0	0	0	0	0	0	0	0	0	0	0	0	0	0	0	0	0	0	0	0	0	0	0	0	0	0	0	0	0	0	0
NC_007530	578722	ATTGAATGGA.GAAGATGGAT	G	C	40	PASS	NA	GT	0	0	0	0	0	0	0	0	1	0	0	0	0	0	0	0	0	0	0	0	0	0	0	0	0	0	0	0	0	0	0	0	0	0	0	0	0	0	0	0	0
NC_007530	579192	CAGTAGCGAT.TGTAGAAGTG	T	G	40	PASS	NA	GT	0	0	0	0	0	0	0	0	1	0	0	0	0	0	0	0	0	0	0	0	0	0	0	0	0	0	0	0	0	0	0	0	0	0	0	0	0	0	0	0	0
NC_007530	580420	TCAGAGGGAG.CGGGATTAGG	C	T	40	PASS	NA	GT	0	0	0	0	0	0	0	0	0	0	0	0	0	0	0	0	0	0	0	0	0	0	0	0	0	0	0	0	0	0	0	0	0	0	1	1	0	0	0	0	0
NC_007530	583166	ATCTCCAAAA.TGATTAATAT	T	C	40	PASS	NA	GT	0	0	0	0	0	1	0	0	0	0	0	0	0	0	0	0	0	0	0	0	0	0	0	0	0	0	0	0	0	0	0	0	0	0	0	0	0	0	0	0	0
NC_007530	583729	AAATGATGCG.ACAGATCAAA	A	T	40	PASS	NA	GT	0	0	0	0	0	0	0	0	1	0	0	0	0	0	0	0	0	0	0	0	0	0	0	0	0	0	0	0	0	0	0	0	0	0	0	0	0	0	0	0	0
NC_007530	583730	AATGATGCGA.CAGATCAAAT	C	G	40	PASS	NA	GT	0	0	0	0	0	0	0	0	1	0	0	0	0	0	0	0	0	0	0	0	0	0	0	0	0	0	0	0	0	0	0	0	0	0	0	0	0	0	0	0	0
NC_007530	586506	TGTACATGAT.ATGGGGAGTA	A	G	40	PASS	NA	GT	0	0	0	0	0	0	0	0	1	0	0	0	0	0	0	0	0	0	0	0	0	0	0	0	0	0	0	0	0	0	0	0	0	0	0	0	0	0	0	0	0
NC_007530	587358	GCAATACTTT.CGTTATTTAT	C	T	40	PASS	NA	GT	0	0	0	0	0	0	0	0	0	0	0	0	0	1	0	0	0	0	0	0	0	0	0	0	0	0	0	0	0	0	0	0	0	0	0	0	0	0	0	0	0
NC_007530	587369	GTTATTTATT.CCATCATTAC	C	T	40	PASS	NA	GT	0	0	0	0	0	0	0	0	0	0	0	0	0	1	0	0	0	0	0	0	0	0	0	0	0	0	0	0	0	0	0	0	0	0	0	0	0	0	0	0	0
NC_007530	587530	GTTTCGTTCG.CATGTTTATT	C	T	40	PASS	NA	GT	0	0	0	0	0	0	0	0	1	0	0	0	0	0	0	0	0	0	0	0	0	0	0	0	0	0	0	0	0	0	0	0	0	0	0	0	0	0	0	0	0
NC_007530	587914	CATTAATGGG.AGCAGGTTTA	A	C	40	PASS	NA	GT	0	0	0	0	0	0	0	0	0	0	0	0	0	0	0	0	0	0	0	0	0	0	0	0	0	0	0	0	0	0	0	0	0	0	0	0	0	0	0	0	0
NC_007530	589450	TGTATTGGCG.TTCCCTGGAA	T	C	40	PASS	NA	GT	0	0	0	0	0	0	0	0	0	1	0	0	0	0	0	0	0	0	0	0	0	0	0	0	0	0	0	0	0	0	0	0	0	0	0	0	0	0	0	0	0
NC_007530	589451	GTATTGGCGT.TCCCTGGAAT	T	A	40	PASS	NA	GT	0	0	0	0	0	0	0	0	0	1	0	0	0	0	0	0	0	0	0	0	0	0	0	0	0	0	0	0	0	0	0	0	0	0	0	0	0	0	0	0	0
NC_007530	589709	CCTAAAAGGC.ACTGCTTTTT	A	C	40	PASS	NA	GT	0	0	0	0	0	0	0	0	0	0	0	0	0	0	0	0	0	0	0	0	0	0	0	0	0	0	0	0	0	0	0	0	0	0	0	0	0	0	0	0	0
NC_007530	589712	AAAAGGCACT.GCTTTTTTGA	G	C	40	PASS	NA	GT	0	0	0	0	0	0	0	0	0	0	0	0	0	0	0	0	0	0	0	0	0	0	0	0	0	0	0	0	0	0	0	0	0	0	0	0	0	0	0	0	0
NC_007530	589785	CTATTTATTT.AATTCTATTG	A	G	40	PASS	NA	GT	0	0	0	0	0	0	0	0	0	1	0	0	0	0	0	0	0	0	0	0	0	0	0	0	0	0	0	0	0	0	0	0	0	0	0	0	0	0	0	0	0
NC_007530	590144	CTTGTTGAAA.GAGTAAGGGT	G	T	40	PASS	NA	GT	0	0	0	0	0	0	0	0	1	0	0	0	0	0	0	0	0	0	0	0	0	0	0	0	0	0	0	0	0	0	0	0	0	0	0	0	0	0	0	0	0
NC_007530	590145	TTGTTGAAAG.AGTAAGGGTG	A	G	40	PASS	NA	GT	0	0	0	0	0	0	0	0	1	0	0	0	0	0	0	0	0	0	0	0	0	0	0	0	0	0	0	0	0	0	0	0	0	0	0	0	0	0	0	0	0
NC_007530	590172	TACTGATCCT.TGCTTTAGTG	T	A	40	PASS	NA	GT	0	0	0	0	0	0	0	0	0	1	0	0	0	0	0	0	0	0	0	0	0	0	0	0	0	0	0	0	0	0	0	0	0	0	0	0	0	0	0	0	0
NC_007530	590332	AAGGAGGGGG.TTTCTTCCCA	T	G	40	PASS	NA	GT	0	0	0	0	0	0	0	0	0	0	0	0	0	0	0	0	0	0	0	0	0	0	0	0	0	0	0	0	0	0	0	0	0	0	0	0	0	0	0	0	0
NC_007530	593051	ATAAGGCATG.GTTTACAAGA	G	T	40	PASS	NA	GT	0	0	0	0	0	0	0	0	1	0	0	0	0	0	0	0	0	0	0	0	0	0	0	0	0	0	0	0	0	0	0	0	0	0	0	0	0	0	0	0	0
NC_007530	595491	AAAAATAGTC.TAAGTAACGA	T	C	40	PASS	NA	GT	0	1	1	1	1	1	1	1	1	1	1	1	1	1	1	1	1	1	1	1	1	1	1	1	1	1	1	1	1	1	1	1	1	1	1	1	1	1	1	1	1
NC_007530	595956	AAAATTTTTA.CCATAATCTT	C	T	40	PASS	NA	GT	0	0	0	0	0	0	0	0	0	0	0	0	0	0	0	0	0	0	0	0	0	0	0	0	0	0	0	0	0	0	0	0	0	0	0	0	0	0	0	0	0
NC_007530	596951	AGTTGTTCTA.CGTGTAATTT	C	T	40	PASS	NA	GT	0	0	0	0	0	0	0	0	1	1	0	0	0	0	0	0	0	0	1	0	0	0	0	0	0	0	0	0	0	0	0	0	0	0	0	0	0	0	0	0	0
NC_007530	596989	TGCTTTAATA.AGAGCTCGTC	A	T	40	PASS	NA	GT	0	0	0	0	0	0	0	0	0	1	0	0	0	0	0	0	0	0	0	0	0	0	0	0	0	0	0	0	0	0	0	0	0	0	0	0	0	0	0	0	0
NC_007530	597498	ATTTTTATAA.CTAAAATAAC	C	A	40	LCB	NA	GT	0	0	0	0	0	0	0	0	0	0	0	0	0	0	0	0	0	0	0	0	0	0	0	0	0	0	0	0	0	0	0	0	0	0	0	0	0	0	0	0	0
NC_007530	597499	TTTTTATAAC.TAAAATAACT	T	A	40	LCB	NA	GT	0	0	0	0	0	0	0	0	0	0	0	0	0	0	0	0	0	0	0	0	0	0	0	0	0	0	0	0	0	0	0	0	0	0	0	0	0	0	0	0	0
NC_007530	598676	TAGATGGTAA.AGAGTTTTCA	A	C	40	PASS	NA	GT	0	0	0	0	0	0	0	0	1	0	0	0	0	0	0	0	0	0	0	0	0	0	0	0	0	0	0	0	0	0	0	0	0	0	0	0	0	0	0	0	0
NC_007530	598677	AGATGGTAAA.GAGTTTTCAG	G	T	40	PASS	NA	GT	0	0	0	0	0	0	0	0	1	0	0	0	0	0	0	0	0	0	0	0	0	0	0	0	0	0	0	0	0	0	0	0	0	0	0	0	0	0	0	0	0
NC_007530	598678	GATGGTAAAG.AGTTTTCAGC	A	G	40	PASS	NA	GT	0	0	0	0	0	0	0	0	1	0	0	0	0	0	0	0	0	0	0	0	0	0	0	0	0	0	0	0	0	0	0	0	0	0	0	0	0	0	0	0	0
NC_007530	600436	TGTGATATGG.CAACATTACC	C	A	40	PASS	NA	GT	0	0	0	0	0	0	0	0	0	0	0	0	0	0	0	0	0	0	0	0	0	0	0	0	0	0	0	0	0	0	0	0	0	0	0	0	0	0	0	0	0
NC_007530	600586	GGAAAACTAC.GTGGTATGTA	G	T	40	PASS	NA	GT	0	0	0	0	0	0	0	0	0	1	0	0	0	0	0	0	0	0	0	0	0	0	0	0	0	0	0	0	0	0	0	0	0	0	0	0	0	0	0	0	0
NC_007530	601897	ACGAAACAAA.TTACATCCAG	T	C	40	PASS	NA	GT	0	0	0	0	0	0	0	0	0	0	0	0	0	0	0	0	0	0	1	0	0	0	0	0	0	0	0	0	0	0	0	0	0	0	0	0	0	0	0	0	0
NC_007530	602705	AAATTCAAAT.TCCTAACTTC	T	C	40	PASS	NA	GT	0	0	1	1	1	1	1	0	0	0	0	0	0	0	0	0	1	0	0	0	0	1	0	0	0	0	0	0	0	0	0	0	0	0	0	0	0	0	0	0	0
NC_007530	603074	ATTTATTTAG.CTTTATCGTG	C	T	40	PASS	NA	GT	0	0	0	0	0	0	0	0	0	0	0	0	0	0	0	0	0	0	0	0	0	0	0	0	0	0	0	0	0	1	0	1	0	0	0	0	1	0	0	0	0
NC_007530	605749	TGTTAGGGGA.AAGTAAAAGT	A	C	40	PASS	NA	GT	0	0	0	0	0	0	0	0	0	1	0	0	0	0	0	0	0	0	0	0	0	0	0	0	0	0	0	0	0	0	0	0	0	0	0	0	0	0	0	0	0
NC_007530	606452	ACGTGATTTA.CCAATTGGTA	C	A	40	PASS	NA	GT	0	0	0	0	0	0	0	0	0	0	0	0	0	0	0	0	0	0	0	0	0	0	0	0	1	0	0	0	0	0	0	0	0	0	0	0	0	0	0	0	0
NC_007530	606483	TTAGTTATTT.GTACAATTAT	G	A	40	PASS	NA	GT	0	0	0	0	0	0	0	0	0	0	0	0	0	0	0	0	0	0	0	0	0	0	0	0	0	0	0	0	0	0	0	0	0	0	0	0	0	0	0	0	0
NC_007530	607331	TATAATAAAA.GTATAAGATA	G	A	40	PASS	NA	GT	0	0	0	0	0	0	0	0	1	0	0	0	0	0	0	0	0	0	0	0	0	0	0	0	0	0	0	0	0	0	0	0	0	0	0	0	0	0	0	0	0
NC_007530	609043	GTTTATTCCA.CCACTTATTT	C	T	40	PASS	NA	GT	0	0	0	0	0	0	0	0	0	0	0	0	0	0	0	0	0	0	0	0	0	0	0	0	0	0	0	0	0	0	0	0	0	0	0	0	0	0	0	0	0
NC_007530	610144	ACGAGTGAAA.GATTTATAAA	G	T	40	LCB	NA	GT	0	0	1	0	0	0	0	0	0	0	0	0	0	0	0	0	0	0	0	0	0	0	0	0	0	0	0	0	0	0	0	0	0	0	0	0	0	0	0	0	0
NC_007530	610332	TATTGAAAAA.ACAGAGAAGG	A	T	40	PASS	NA	GT	0	0	0	0	0	0	0	0	0	0	0	0	0	0	0	0	0	0	0	0	0	0	0	0	0	0	0	0	0	0	0	0	0	0	0	0	0	0	0	0	0
NC_007530	610333	ATTGAAAAAA.CAGAGAAGGG	C	A	40	PASS	NA	GT	0	0	0	0	0	0	0	0	0	0	0	0	0	0	0	0	0	0	0	0	0	0	0	0	0	0	0	0	0	0	0	0	0	0	0	0	0	0	0	0	0
NC_007530	610335	TGAAAAAACA.GAGAAGGGGA	G	A	40	PASS	NA	GT	0	0	0	0	0	0	0	0	0	0	0	0	0	0	0	0	0	0	0	0	0	0	0	0	0	0	0	0	0	0	0	0	0	0	0	0	0	0	0	0	0
NC_007530	611266	CCGTACGTTG.CTTGTAGAGG	C	T	40	PASS	NA	GT	0	0	0	0	0	0	0	0	0	0	0	0	0	0	1	1	0	0	0	0	0	0	0	0	0	0	0	0	0	0	0	0	0	0	0	0	0	0	0	0	0
NC_007530	611291	CCACCAATAA.AGGCAGCGCG	A	G,C	40	PASS	NA	GT	0	0	0	0	0	0	1	0	2	0	0	0	0	0	0	0	0	0	0	0	0	0	0	0	0	0	0	0	0	0	0	0	0	0	0	0	0	0	0	0	0
NC_007530	611299	AAAGGCAGCG.CGTGTGCCCC	C	T	40	PASS	NA	GT	0	0	0	0	0	0	0	0	0	0	0	0	0	0	0	0	0	0	0	0	0	0	0	0	0	0	0	0	0	0	0	0	0	0	0	0	0	0	0	0	0
NC_007530	611969	TATTTCTCAA.GATTTTATGT	G	T	40	PASS	NA	GT	0	0	0	0	0	0	0	0	1	1	0	0	0	0	0	0	0	0	0	0	0	0	0	0	0	0	0	0	0	0	0	0	0	0	0	0	0	0	0	0	0
NC_007530	612054	GGCAAACAAG.TCTTTTACAA	T	C	40	PASS	NA	GT	0	0	0	0	0	1	0	0	0	0	0	0	0	0	0	0	0	0	0	0	0	0	0	0	0	0	0	0	0	0	0	0	0	0	0	0	0	0	0	0	0
NC_007530	612066	TTTTACAAAC.GGCTACAGCA	G	A	40	PASS	NA	GT	0	0	1	0	0	0	0	0	0	0	0	0	0	0	0	0	0	0	0	0	0	0	0	0	0	0	0	0	0	0	0	0	0	0	0	0	0	0	0	0	0
NC_007530	612173	AGAGATTCTA.CAATTGCTCT	C	T	40	PASS	NA	GT	0	0	0	0	0	0	0	0	0	0	0	0	0	0	0	0	0	0	0	0	0	0	0	0	0	0	0	0	0	0	0	0	0	0	0	0	0	0	0	0	0
NC_007530	612624	TATACTCATT.TAGATATTCA	T	G	40	PASS	NA	GT	0	0	0	0	0	0	0	0	0	0	0	0	0	0	0	0	0	0	0	0	0	0	0	0	0	0	0	0	0	0	0	0	1	0	0	0	0	0	0	0	0
NC_007530	612910	TAGATAGTCT.ACAACTTCAA	A	T	40	PASS	NA	GT	0	0	0	0	0	0	0	0	0	0	0	0	0	0	0	0	0	0	0	0	0	0	0	0	0	0	0	0	0	0	0	0	0	0	0	0	0	0	0	0	0
NC_007530	613127	AGCATTTTTG.GAAAATGAGG	G	A	40	PASS	NA	GT	0	0	0	0	0	0	0	0	0	0	0	0	0	0	1	0	0	0	0	0	0	0	0	0	0	0	0	0	0	0	0	0	0	0	0	0	0	0	0	0	0
NC_007530	613142	TGAGGCTATC.CCGTTGTATA	C	T	40	PASS	NA	GT	0	0	0	0	0	0	0	0	0	0	0	0	0	0	0	0	0	0	0	0	0	0	0	0	0	0	0	0	0	0	0	0	0	0	0	0	0	0	0	1	1
NC_007530	614098	CACCTAAATA.TGAGGTAGAA	T	C	40	PASS	NA	GT	0	0	0	0	0	0	0	0	0	0	0	0	0	0	0	0	0	0	0	0	0	0	0	0	0	0	0	0	0	0	0	0	0	0	0	0	0	0	0	0	0
NC_007530	618004	GTGTTAATTT.ATAGTCGCGT	A	T	40	PASS	NA	GT	0	0	0	0	0	0	0	0	0	1	0	0	0	0	0	0	0	0	0	0	0	0	0	0	0	0	0	0	0	0	0	0	0	0	0	0	0	0	0	0	0
NC_007530	618249	CCATCGAGAG.AAATACCTTC	A	T	40	PASS	NA	GT	0	0	0	0	0	0	0	0	1	0	0	0	0	0	0	0	0	0	0	0	0	0	0	0	0	0	0	0	0	0	0	0	0	0	0	0	0	0	0	0	0
NC_007530	619369	CATAATTCTT.GTCCCTAATA	G	T	40	PASS	NA	GT	0	0	0	0	0	0	0	0	1	0	0	0	0	0	0	0	0	0	0	0	0	0	0	0	0	0	0	0	0	0	0	0	0	0	0	0	0	0	0	0	0
NC_007530	619871	ATTGTATACA.AAAGATAGGG	A	G	40	PASS	NA	GT	0	0	0	0	0	0	0	0	0	1	0	0	0	0	0	0	0	0	0	0	0	0	0	0	0	0	0	0	0	0	0	0	0	0	0	0	0	0	0	0	0
NC_007530	621749	AGTTTGCAAT.TATTAAGGTG	T	G	40	PASS	NA	GT	0	0	0	0	0	0	0	0	0	0	0	0	0	0	0	0	0	0	0	0	0	0	0	0	0	0	0	0	0	0	0	0	0	0	0	0	0	0	0	0	0
NC_007530	621989	CATTTATTAT.TGCTTTTGCA	T	C	40	PASS	NA	GT	0	0	0	0	0	0	0	0	1	0	0	0	0	0	0	0	0	0	0	0	0	0	0	0	0	0	0	0	0	0	0	0	0	0	0	0	0	0	0	0	0
NC_007530	622149	AAATGGTTCG.GCAAGGCTTG	G	A	40	PASS	NA	GT	0	0	0	0	0	1	0	0	0	0	0	0	0	0	0	0	0	0	0	0	0	0	0	0	0	0	0	0	0	0	0	0	0	0	0	0	0	0	0	0	0
NC_007530	622748	TAAGTGAAGG.TGGACACTGA	T	G	40	PASS	NA	GT	0	0	0	0	0	0	0	0	1	0	0	0	0	0	0	0	0	0	0	0	0	0	0	0	0	0	0	0	0	0	0	0	0	0	0	0	0	0	0	0	0
NC_007530	652963	AACTCGTCCT.TCCATTAAAT	T	G	40	PASS	NA	GT	0	0	0	0	0	0	0	0	1	0	0	0	0	0	0	0	0	0	0	0	0	0	0	0	0	0	0	0	0	0	0	0	0	0	0	0	0	0	0	0	0
NC_007530	654076	AAGATATTGG.AATTAGGAAG	A	T	40	PASS	NA	GT	0	0	0	0	0	0	0	0	1	0	0	0	0	0	0	0	0	0	0	0	0	0	0	0	0	0	0	0	0	0	0	0	0	0	0	0	0	0	0	0	0
NC_007530	654706	TTACGTATTG.CGTTTAACCC	C	T	40	PASS	NA	GT	0	0	0	0	0	0	0	0	0	0	0	0	0	0	0	0	0	0	0	0	0	0	0	0	1	0	0	1	0	0	0	0	0	0	0	0	0	0	0	0	0
NC_007530	656577	GCAACAGCAT.TTATGATGAT	T	A	40	PASS	NA	GT	0	0	0	0	0	0	0	0	1	0	0	0	0	0	0	0	0	0	0	0	0	0	0	0	0	0	0	0	0	0	0	0	0	0	0	0	0	0	0	0	0
NC_007530	656615	CGTATTTGAT.GCAAGCGGAA	G	T	40	PASS	NA	GT	0	0	1	0	0	0	0	0	0	0	0	0	0	0	0	0	0	0	0	0	0	0	0	0	0	0	0	0	0	0	0	0	0	0	0	0	0	0	0	0	0
NC_007530	658847	GAGGATGAGA.GTACTCATCC	G	T	40	PASS	NA	GT	0	0	0	0	0	0	0	0	0	0	0	0	0	0	0	0	0	0	0	0	0	0	0	1	0	0	0	0	0	0	0	0	1	1	0	0	0	0	0	0	0
NC_007530	659904	CAGATTGAGG.CTGCAAGATC	C	T	40	PASS	NA	GT	0	0	0	0	0	0	0	0	1	0	0	0	0	0	0	0	0	0	0	0	0	0	0	0	0	0	0	0	0	0	0	0	0	0	0	0	0	0	0	0	0
NC_007530	659984	AATGGTTCCG.CCGCTTGTTA	C	T	40	PASS	NA	GT	0	0	0	0	0	0	0	0	0	0	0	0	0	0	0	0	0	0	0	0	0	0	0	0	0	0	0	0	0	0	0	0	0	0	0	0	0	0	0	0	0
NC_007530	660768	AATGTTGATG.TTTGGGTATG	T	C	40	PASS	NA	GT	0	0	0	0	0	0	0	0	1	0	0	0	0	0	0	0	0	0	0	0	0	0	0	0	0	0	0	0	0	0	0	0	0	0	0	0	0	0	0	0	0
NC_007530	662306	GACTATGTAA.CATGCTTTCT	C	A	40	PASS	NA	GT	0	0	1	0	0	0	0	0	0	0	0	0	0	0	0	0	0	0	0	0	0	0	0	0	0	0	0	0	0	0	0	0	0	0	0	0	0	0	0	0	0
NC_007530	662327	GATCATGAGC.CTTTCTATAC	C	A	40	PASS	NA	GT	0	0	1	0	0	0	0	0	0	0	0	0	0	0	0	0	0	0	0	0	0	0	0	0	0	0	0	0	0	0	0	0	0	0	0	0	0	0	0	0	0
NC_007530	662496	ATGGTGGAAT.ATTTAACGAG	A	G	40	PASS	NA	GT	0	0	0	0	0	0	0	0	0	0	0	0	0	0	0	0	0	0	0	0	0	0	0	0	0	0	0	0	0	0	0	0	0	0	0	0	0	0	0	0	0
NC_007530	663990	GTTATATTGG.AAACGATGTA	A	G	40	PASS	NA	GT	0	0	0	0	0	0	0	0	1	0	0	0	0	0	0	0	0	0	0	0	0	0	0	0	0	0	0	0	0	0	0	0	0	0	0	0	0	0	0	0	0
NC_007530	667201	TCGAGTAGTT.GTTAACGAAA	G	T	40	PASS	NA	GT	0	0	0	0	0	0	0	0	1	0	0	0	0	0	0	0	0	0	0	0	0	0	0	0	0	0	0	0	0	0	0	0	0	0	0	0	0	0	0	0	0
NC_007530	668028	GTTCACATGA.CGTAAAAATA	C	G	40	PASS	NA	GT	0	0	0	0	0	0	0	0	1	0	0	0	0	0	0	0	0	0	0	0	0	0	0	0	0	0	0	0	0	0	0	0	0	0	0	0	0	0	0	0	0
NC_007530	670237	TTATACGCAG.CCTTTTGTAT	C	T	40	PASS	NA	GT	0	0	0	0	0	0	0	0	1	0	0	0	0	0	0	0	0	0	0	0	0	0	0	0	0	0	0	0	0	0	0	0	0	0	0	0	0	0	0	0	0
NC_007530	670746	GTTAGGGATT.ATTTTACCGT	A	G	40	PASS	NA	GT	0	0	0	0	0	0	0	0	0	0	0	0	0	0	0	0	0	0	0	0	0	0	0	0	0	0	0	0	0	0	0	0	0	0	0	0	0	0	0	0	0
NC_007530	670915	GCAGGATGTG.CAATGATTGG	C	T	40	PASS	NA	GT	0	0	0	0	0	0	0	0	0	0	0	0	0	0	0	0	0	0	0	0	0	0	0	0	0	0	0	0	0	0	0	0	0	0	0	0	0	0	0	0	0
NC_007530	671099	ATTGGAACTC.TGTAGCAACG	T	C	40	PASS	NA	GT	0	0	0	0	0	0	0	0	0	1	0	0	0	0	0	0	0	0	0	0	0	0	0	0	0	0	0	0	0	0	0	0	0	0	0	0	0	0	0	0	0
NC_007530	671726	TGTGTACGTA.GTTGATAATA	G	T	40	PASS	NA	GT	0	0	0	0	0	0	0	0	1	0	0	0	0	0	0	0	0	0	0	0	0	0	0	0	0	0	0	0	0	0	0	0	0	0	0	0	0	0	0	0	0
NC_007530	671727	GTGTACGTAG.TTGATAATAG	T	A	40	PASS	NA	GT	0	0	0	0	0	0	0	0	1	0	0	0	0	0	0	0	0	0	0	0	0	0	0	0	0	0	0	0	0	0	0	0	0	0	0	0	0	0	0	0	0
NC_007530	672102	CGTATAAAAG.GGGAGAGTGT	G	C	40	PASS	NA	GT	0	0	0	0	0	0	0	0	1	0	0	0	0	0	0	0	0	0	0	0	0	0	0	0	0	0	0	0	0	0	0	0	0	0	0	0	0	0	0	0	0
NC_007530	673399	CAATATCACC.TTTTTTCAGA	T	C	40	PASS	NA	GT	0	0	0	0	0	0	0	0	1	0	0	0	0	0	0	0	0	0	0	0	0	0	0	0	0	0	0	0	0	0	0	0	0	0	0	0	0	0	0	0	0
NC_007530	673405	CACCTTTTTT.CAGAGATGCA	C	A	40	PASS	NA	GT	0	0	1	0	0	0	0	0	0	0	0	0	0	0	0	0	0	0	0	0	0	0	0	0	0	0	0	0	0	0	0	0	0	0	0	0	0	0	0	0	0
NC_007530	673932	GTTGCAGCAC.CGTCATTTGT	C	A	40	PASS	NA	GT	0	0	1	0	0	0	0	0	0	0	0	0	0	0	0	0	0	0	0	0	0	0	0	0	0	0	0	0	0	0	0	0	0	0	0	0	0	0	0	0	0
NC_007530	674870	GCTAAACCAA.CTGTAAAGGA	C	T	40	PASS	NA	GT	0	0	0	0	0	0	0	0	0	0	0	0	0	0	0	0	0	0	0	0	0	0	0	1	0	0	0	0	0	0	0	0	0	0	0	0	0	0	0	0	0
NC_007530	679203	TAAGCCTAAT.GTTACAAGAG	G	T	40	PASS	NA	GT	0	0	0	0	0	0	0	0	0	1	0	0	0	0	0	0	0	0	0	0	0	0	0	0	0	0	0	0	0	0	0	0	0	0	0	0	0	0	0	0	0
NC_007530	681766	TAACAAAAAA.TTTAGTACCT	T	A	40	PASS	NA	GT	0	0	0	0	0	0	0	0	0	0	0	0	0	0	1	0	0	0	0	0	0	0	0	0	0	0	0	0	0	0	0	0	0	0	0	0	0	0	0	0	0
NC_007530	682047	ATGCTGAAGA.GCCAGCTGCA	G	C	40	PASS	NA	GT	0	0	0	0	0	0	0	0	1	0	0	0	0	0	0	0	0	0	0	0	0	0	0	0	0	0	0	0	0	0	0	0	0	0	0	0	0	0	0	0	0
NC_007530	682911	AGAAGAATAC.CCGCATATTG	C	T	40	PASS	NA	GT	0	0	0	0	0	0	0	0	1	0	0	0	0	0	0	0	0	0	0	0	0	0	0	0	0	0	0	0	0	0	0	0	0	0	0	0	0	0	0	0	0
NC_007530	683216	AAATAGATGC.CAAATATTGC	C	G	40	PASS	NA	GT	0	0	0	0	0	0	0	0	0	0	0	0	0	0	0	0	0	0	1	0	0	0	0	0	0	0	0	0	0	0	0	0	0	0	0	0	0	0	0	0	0
NC_007530	683464	CGACTATGTG.GTACCGGTTA	G	C	40	PASS	NA	GT	0	0	0	0	0	0	0	0	1	0	0	0	0	0	0	0	0	0	0	0	0	0	0	0	0	0	0	0	0	0	0	0	0	0	0	0	0	0	0	0	0
NC_007530	684623	CATTGATGGG.GGAAAATGGA	G	A	40	PASS	NA	GT	0	0	0	0	0	0	0	0	0	0	0	0	0	0	0	0	0	0	0	0	0	0	0	0	0	0	0	0	0	0	0	0	0	0	0	0	0	0	0	0	0
NC_007530	685803	TGATGTTGGA.GCGAAAAAAG	G	T	40	PASS	NA	GT	0	0	1	0	0	0	0	0	0	0	0	0	0	0	0	0	0	0	0	0	0	0	0	0	0	0	0	0	0	0	0	0	0	0	0	0	0	0	0	0	0
NC_007530	686161	TTATTGCATT.CGGAATGACC	C	T	40	PASS	NA	GT	0	0	0	0	0	0	0	0	0	0	0	0	0	0	0	0	0	0	0	0	0	0	0	0	0	0	0	0	0	0	0	0	0	0	0	0	0	0	0	0	0
NC_007530	687827	ACGCAAGGTA.AAAAAGTGGA	A	G	40	PASS	NA	GT	0	0	0	0	0	0	0	0	1	0	0	0	0	0	0	0	0	0	0	0	0	0	0	0	0	0	0	0	0	0	0	0	0	0	0	0	0	0	0	0	0
NC_007530	688594	GTTTAAGTAA.CTAGGATTCT	C	A	40	PASS	NA	GT	0	0	0	0	0	0	0	0	0	0	0	0	0	0	0	0	0	0	0	0	0	0	0	0	0	0	0	0	0	0	0	0	0	0	0	0	0	0	0	0	0
NC_007530	688602	AACTAGGATT.CTTTTTTGTA	C	T	40	PASS	NA	GT	0	0	0	0	0	0	0	0	0	0	0	0	0	0	0	0	0	0	0	0	0	0	0	0	0	0	0	0	0	0	0	0	0	0	0	0	0	0	0	0	0
NC_007530	688604	CTAGGATTCT.TTTTTGTATT	T	G	40	PASS	NA	GT	0	0	0	0	0	0	0	0	0	0	0	0	0	0	0	0	0	0	0	0	0	0	0	0	0	0	0	0	0	0	0	0	0	0	0	0	0	0	0	0	0
NC_007530	689521	TTTGATGGTT.CAAAAGTAAA	C	T	40	PASS	NA	GT	0	0	0	0	0	0	0	0	0	0	0	0	0	0	0	0	0	0	0	0	0	0	0	0	0	0	0	0	0	0	0	0	0	0	0	0	0	0	0	0	0
NC_007530	690460	GATTATAAAG.CAAATTATGA	C	A	40	PASS	NA	GT	0	0	1	0	0	0	0	0	0	0	0	0	0	0	0	0	0	0	0	0	0	0	0	0	0	0	0	0	0	0	0	0	0	0	0	0	0	0	0	0	0
NC_007530	692074	CAGTTCCAAT.AACGAAGCTG	A	T	40	PASS	NA	GT	0	0	0	0	0	0	0	0	1	0	0	0	0	0	0	0	0	0	0	0	0	0	0	0	0	0	0	0	0	0	0	0	0	0	0	0	0	0	0	0	0
NC_007530	692534	AATATACGCC.TGTAATAACG	T	C	40	PASS	NA	GT	0	0	0	0	0	0	0	0	1	0	0	0	0	0	0	0	0	0	0	0	0	0	0	0	0	0	0	0	0	0	0	0	0	0	0	0	0	0	0	0	0
NC_007530	692623	ATACGTTATT.TGGTAAGAAG	T	C	40	PASS	NA	GT	0	0	0	0	0	0	0	0	0	0	0	0	0	0	0	0	0	0	0	0	0	0	0	0	1	1	0	1	0	0	0	0	0	0	0	0	0	0	0	0	0
NC_007530	692932	AACTCGTAAG.CCCCATGCTT	C	T	40	PASS	NA	GT	0	1	1	1	1	1	1	1	1	1	1	1	1	1	1	1	1	1	1	1	1	1	1	1	1	1	1	1	1	1	1	1	1	1	1	1	1	1	1	1	1
NC_007530	693864	CGGTTCATGC.AGTACGTCAA	A	T	40	PASS	NA	GT	0	0	0	0	0	0	0	0	1	0	0	0	0	0	0	0	0	0	0	0	0	0	0	0	0	0	0	0	0	0	0	0	0	0	0	0	0	0	0	0	0
NC_007530	694344	CGAAAAAAAT.CACAGTAGAT	C	T	40	PASS	NA	GT	0	0	0	0	0	0	0	0	0	1	0	0	0	0	0	0	0	0	0	0	0	0	0	0	0	0	0	0	0	0	0	0	0	0	0	0	0	0	0	0	0
NC_007530	694405	AACACAAGTG.AAAATTCTTG	A	G	40	PASS	NA	GT	0	0	0	0	0	0	0	0	0	0	0	0	0	0	0	0	0	0	0	0	0	0	0	0	0	0	0	0	0	0	0	0	0	0	0	0	0	0	0	0	0
NC_007530	695111	ACAAAAAGTT.TACAATAATT	T	A	40	PASS	NA	GT	0	0	0	0	0	0	0	0	0	0	0	0	0	0	0	0	0	0	0	0	0	0	0	0	1	0	0	0	0	0	0	0	0	0	0	0	0	0	0	0	0
NC_007530	696127	AGGAGTTTTA.TACGGAGGAT	T	C	40	PASS	NA	GT	0	0	0	0	0	0	0	0	0	1	0	0	0	0	0	0	0	0	0	0	0	0	0	0	0	0	0	0	0	0	0	0	0	0	0	0	0	0	0	0	0
NC_007530	696863	ACGACAAACA.GTATTGCAAA	G	A	40	PASS	NA	GT	0	0	0	0	0	0	0	0	0	0	0	0	0	0	0	0	0	0	0	0	0	0	0	0	0	0	0	0	1	0	0	0	0	0	0	0	0	0	0	0	0
NC_007530	697900	GGAGGCACAG.GAAGTATAAA	G	T	40	PASS	NA	GT	0	0	1	0	0	0	0	0	0	0	0	0	0	0	0	0	0	0	0	0	0	0	0	0	0	0	0	0	0	0	0	0	0	0	0	0	0	0	0	0	0
NC_007530	698429	AAGTATACAA.GATGTAGTAG	G	C	40	PASS	NA	GT	0	0	0	0	0	0	0	0	0	1	0	0	0	0	0	0	0	0	0	0	0	0	0	0	0	0	0	0	0	0	0	0	0	0	0	0	0	0	0	0	0
NC_007530	699180	AAAGCTGTAC.CGAATACAAA	C	T	40	PASS	NA	GT	0	0	0	0	0	0	0	0	0	0	0	0	0	0	0	0	0	0	0	0	0	0	0	0	0	0	0	0	0	0	0	0	0	0	0	0	0	0	0	0	0
NC_007530	700335	CGTATAGTCC.GGTTACTTGT	G	C	40	PASS	NA	GT	0	0	0	0	0	0	0	0	1	0	0	0	0	0	0	0	0	0	0	0	0	0	0	0	0	0	0	0	0	0	0	0	0	0	0	0	0	0	0	0	0
NC_007530	702761	TGATTGTTCA.GCTAATTTGT	G	C	40	PASS	NA	GT	0	1	1	1	1	1	1	1	1	1	1	1	1	1	1	1	1	1	1	1	1	1	1	1	1	1	1	1	1	1	1	1	1	1	1	1	1	1	1	1	1
NC_007530	703796	AGATTTCTTA.CAACGTATGA	C	T	40	PASS	NA	GT	0	0	0	0	0	0	0	0	0	0	0	0	0	0	0	0	0	0	0	0	0	0	0	0	0	0	0	0	0	0	0	0	0	0	0	0	0	0	0	0	0
NC_007530	705326	CTATATGTTC.CTGCATATCC	C	A	40	PASS	NA	GT	0	0	1	0	0	0	0	0	0	0	0	0	0	0	0	0	0	0	0	0	0	0	0	0	0	0	0	0	0	0	0	0	0	0	0	0	0	0	0	0	0
NC_007530	705418	TGCTTAAAAA.GAAACCTTCT	G	A	40	PASS	NA	GT	0	0	0	0	0	0	0	0	0	0	0	0	0	0	0	0	0	0	0	0	0	0	0	0	0	0	0	0	0	0	0	0	0	0	0	0	0	0	0	0	0
NC_007530	708017	ATTGCGATTG.CGAAAGCAGG	C	T	40	PASS	NA	GT	0	0	0	0	0	0	0	0	0	1	0	0	0	0	0	0	0	0	0	0	0	0	0	0	0	0	0	0	0	0	0	0	0	0	0	0	0	0	0	0	0
NC_007530	708464	GCAAATGCTC.TTCGTGCAAA	T	C	40	PASS	NA	GT	0	0	0	0	0	0	0	0	0	0	0	0	0	0	0	0	0	0	0	0	0	0	0	0	0	0	0	0	0	0	0	0	0	0	0	0	0	0	0	0	0
NC_007530	708717	CAATCGGACT.TGTTACATCG	T	A	40	PASS	NA	GT	0	0	0	0	0	0	0	0	1	0	0	0	0	0	0	0	0	0	0	0	0	0	0	0	0	0	0	0	0	0	0	0	0	0	0	0	0	0	0	0	0
NC_007530	710215	GATATTTAGT.GCGAATGCAG	G	T	40	PASS	NA	GT	0	0	0	0	0	0	0	0	1	0	0	0	0	0	0	0	0	0	0	0	0	0	0	0	0	0	0	0	0	0	0	0	0	0	0	0	0	0	0	0	0
NC_007530	710216	ATATTTAGTG.CGAATGCAGT	C	G	40	PASS	NA	GT	0	0	0	0	0	0	0	0	1	0	0	0	0	0	0	0	0	0	0	0	0	0	0	0	0	0	0	0	0	0	0	0	0	0	0	0	0	0	0	0	0
NC_007530	711878	AAAGTAGAAC.CAGCATGCAT	C	T	40	PASS	NA	GT	0	0	0	0	0	0	0	0	0	0	0	0	0	0	0	0	0	0	0	0	0	0	0	0	0	0	0	0	0	0	0	0	0	0	0	0	0	0	0	0	0
NC_007530	712559	GTAATCCATT.TTTTATTCTT	T	G	40	PASS	NA	GT	0	0	0	0	0	0	0	0	0	0	0	0	0	0	0	0	0	0	0	0	0	0	0	0	0	0	0	0	0	0	0	0	0	0	0	0	0	0	0	0	0
NC_007530	712718	GACATAAAAA.CATCCCTTCC	C	T	40	PASS	NA	GT	0	0	0	0	0	0	0	0	0	1	0	0	0	0	0	0	0	0	0	0	0	0	0	0	0	0	0	0	0	0	0	0	0	0	0	0	0	0	0	0	0
NC_007530	713436	TCGATTGCTT.TTGCGAGTGT	T	G	40	PASS	NA	GT	0	0	0	0	0	0	0	0	1	0	0	0	0	0	0	0	0	0	0	0	0	0	0	0	0	0	0	0	0	0	0	0	0	0	0	0	0	0	0	0	0
NC_007530	715301	TACTACAGGC.TCTATCTTTG	T	G	40	PASS	NA	GT	0	0	0	0	0	0	0	0	1	0	0	0	0	0	0	0	0	0	0	0	0	0	0	0	0	0	0	0	0	0	0	0	0	0	0	0	0	0	0	0	0
NC_007530	718175	AAAGAGTCCT.ACAATTAAAA	A	T	40	PASS	NA	GT	0	0	0	0	0	0	0	0	0	1	0	0	0	0	0	0	0	0	0	0	0	0	0	0	0	0	0	0	0	0	0	0	0	0	0	0	0	0	0	0	0
NC_007530	718176	AAGAGTCCTA.CAATTAAAAT	C	A	40	PASS	NA	GT	0	0	0	0	0	0	0	0	0	1	0	0	0	0	0	0	0	0	0	0	0	0	0	0	0	0	0	0	0	0	0	0	0	0	0	0	0	0	0	0	0
NC_007530	718609	TAACTAAATC.CGCAATAACA	C	T	40	PASS	NA	GT	0	0	0	0	0	0	0	0	0	0	0	0	0	0	0	0	0	0	0	0	0	0	0	0	1	1	0	1	0	0	0	0	0	0	0	0	0	0	0	0	0
NC_007530	719805	CCCAAATGAT.ACCGCCTGTT	A	T	40	PASS	NA	GT	0	0	0	0	0	0	0	0	1	0	0	0	0	0	0	0	0	0	0	0	0	0	0	0	0	0	0	0	0	0	0	0	0	0	0	0	0	0	0	0	0
NC_007530	720360	AAAATACCAA.TGCCGCCGAT	T	A	40	PASS	NA	GT	0	0	0	0	0	0	0	0	0	0	0	0	0	0	0	0	0	0	0	0	0	0	0	1	0	0	0	0	0	0	0	0	0	0	0	0	0	0	0	0	0
NC_007530	720897	ATTTTTGGAT.ACCAGAATGT	A	G	40	PASS	NA	GT	0	0	0	0	0	0	0	0	0	0	0	0	0	0	0	0	0	0	0	0	0	0	0	0	0	0	0	0	0	0	0	0	0	0	0	0	0	0	1	0	0
NC_007530	722273	ATATTCAAGT.GATTTTGGAT	G	A	40	PASS	NA	GT	0	0	0	0	0	1	0	0	0	0	0	0	0	0	0	0	0	0	0	0	0	0	0	0	0	0	0	0	0	0	0	0	0	0	0	0	0	0	0	0	0
NC_007530	722828	CGTCCAAATG.ATTTCTAATA	A	T	40	PASS	NA	GT	0	0	0	0	0	0	0	0	0	1	0	0	0	0	0	0	0	0	0	0	0	0	0	0	0	0	0	0	0	0	0	0	0	0	0	0	0	0	0	0	0
NC_007530	748150	GCGTGAATCC.TCCTTTATCA	T	C	40	LCB	NA	GT	0	0	0	0	0	0	0	0	1	1	0	0	0	0	0	0	0	0	1	0	0	0	0	0	0	0	0	0	0	0	0	0	0	0	0	0	0	0	0	0	0
NC_007530	748558	GAGTGATCAA.CTTGTTGGGA	C	T	40	PASS	NA	GT	0	0	0	0	0	0	0	0	0	0	0	0	0	0	0	0	0	0	0	0	0	0	0	0	0	0	0	0	0	0	0	0	0	0	0	0	0	0	0	0	0
NC_007530	749833	GCCATTTTTC.GAAATGATCC	G	T	40	PASS	NA	GT	0	0	1	0	0	0	0	0	0	0	0	0	0	0	0	0	0	0	0	0	0	0	0	0	0	0	0	0	0	0	0	0	0	0	0	0	0	0	0	0	0
NC_007530	750358	GTTTTTTGTT.ATTAGGGACA	A	T	40	PASS	NA	GT	0	0	0	0	0	0	0	0	0	0	0	0	0	0	0	0	0	0	0	0	0	0	0	0	0	0	0	0	0	0	0	0	0	0	0	0	0	0	0	0	0
NC_007530	750373	GGACATGAAT.GTACCTAGCT	G	T	40	PASS	NA	GT	0	0	0	0	0	0	0	0	0	0	0	0	0	0	0	0	0	0	0	0	0	0	0	0	0	0	0	0	0	0	0	0	0	0	0	0	0	0	0	0	0
NC_007530	752131	GTTGCCAGCT.GAGAGTAAGA	G	T	40	PASS	NA	GT	0	0	1	0	0	0	0	0	0	0	0	0	0	0	0	0	0	0	0	0	0	0	0	0	0	0	0	0	0	0	0	0	0	0	0	0	0	0	0	0	0
NC_007530	752404	GTAACCACTT.CTTATATAAA	C	T	40	PASS	NA	GT	0	0	0	0	0	0	0	0	0	0	0	0	0	0	0	0	0	0	0	0	0	0	0	0	0	0	0	0	0	0	0	0	0	0	0	0	0	0	0	0	0
NC_007530	753968	ATGAAATGTA.CATTTTACCG	C	T	40	PASS	NA	GT	0	0	0	0	0	0	0	0	0	1	0	0	0	0	0	0	0	0	0	0	0	0	0	0	0	0	0	0	0	0	0	0	0	0	0	0	0	0	0	0	0
NC_007530	754231	ACGATTTGGA.GTAAGGTCGT	G	T	40	PASS	NA	GT	0	0	0	0	0	0	0	0	0	1	0	0	0	0	0	0	0	0	0	0	0	0	0	0	0	0	0	0	0	0	0	0	0	0	0	0	0	0	0	0	0
NC_007530	754512	GACACAGTTA.GACGGAGCAG	G	A	40	PASS	NA	GT	0	0	0	0	0	0	0	0	1	0	0	0	0	0	0	0	0	0	0	0	0	0	0	0	0	0	0	0	0	0	0	0	0	0	0	0	0	0	0	0	0
NC_007530	755255	CTTTAATCCA.GCAGATTATG	G	T	40	PASS	NA	GT	0	0	0	0	0	0	0	0	0	1	0	0	0	0	0	0	0	0	0	0	0	0	0	0	0	0	0	0	0	0	0	0	0	0	0	0	0	0	0	0	0
NC_007530	756760	TTCCGGTGCA.GATATATATG	G	T	40	PASS	NA	GT	0	0	1	0	0	0	0	0	0	0	0	0	0	0	0	0	0	0	0	0	0	0	0	0	0	0	0	0	0	0	0	0	0	0	0	0	0	0	0	0	0
NC_007530	756945	GAGAAGTAGT.AGCAGTAAAA	A	T	40	PASS	NA	GT	0	0	0	0	0	0	0	0	0	1	0	0	0	0	0	0	0	0	0	0	0	0	0	0	0	0	0	0	0	0	0	0	0	0	0	0	0	0	0	0	0
NC_007530	758676	AATTAGAAGA.GCTTGTTACA	G	A	40	PASS	NA	GT	0	0	1	1	1	1	1	0	0	0	0	0	0	0	0	0	1	0	0	0	0	1	0	0	0	0	0	0	0	0	0	0	0	0	0	0	0	0	0	0	0
NC_007530	759278	AGATTAGTTG.CTTTTAAAGA	C	T	40	PASS	NA	GT	0	0	0	0	0	0	0	0	0	0	0	0	0	0	0	0	0	0	0	0	0	0	0	0	0	0	0	0	0	0	0	0	0	0	0	0	0	0	0	0	0
NC_007530	759438	CCGGCATTCA.AGCAGATTTA	A	C	40	PASS	NA	GT	0	0	0	0	0	0	0	0	0	1	0	0	0	0	0	0	0	0	0	0	0	0	0	0	0	0	0	0	0	0	0	0	0	0	0	0	0	0	0	0	0
NC_007530	760338	CACTCGGGGT.GAATCTTTCA	G	T	40	PASS	NA	GT	0	0	0	0	0	0	0	0	0	0	0	0	0	0	0	0	0	0	0	0	0	0	0	0	0	0	0	0	0	0	0	0	0	0	0	0	0	0	0	0	0
NC_007530	762129	ATCCAGCACA.CATTGAAGGA	C	A	40	PASS	NA	GT	0	0	0	0	0	0	0	0	0	0	0	0	0	0	0	0	0	0	1	0	0	0	0	0	0	0	0	0	0	0	0	0	0	0	0	0	0	0	0	0	0
NC_007530	763157	CTTTCAACAA.GTTTAGGGAC	G	C	40	PASS	NA	GT	0	0	0	0	0	0	0	0	1	0	0	0	0	0	0	0	0	0	0	0	0	0	0	0	0	0	0	0	0	0	0	0	0	0	0	0	0	0	0	0	0
NC_007530	763158	TTTCAACAAG.TTTAGGGACG	T	G	40	PASS	NA	GT	0	0	0	0	0	0	0	0	1	0	0	0	0	0	0	0	0	0	0	0	0	0	0	0	0	0	0	0	0	0	0	0	0	0	0	0	0	0	0	0	0
NC_007530	763241	GCTGCGAATA.ACGGATCTGG	A	T	40	PASS	NA	GT	0	0	0	0	0	0	0	0	1	0	0	0	0	0	0	0	0	0	0	0	0	0	0	0	0	0	0	0	0	0	0	0	0	0	0	0	0	0	0	0	0
NC_007530	763893	AAGCAGTCGA.AGAAAGATGT	A	C	40	PASS	NA	GT	0	0	0	0	0	0	0	0	0	0	0	0	0	0	0	0	0	0	0	0	0	0	0	0	0	0	0	0	0	0	0	0	0	0	0	0	0	0	0	0	0
NC_007530	764666	GAAATCTATA.TCATATAATA	T	C	40	PASS	NA	GT	0	0	0	0	0	0	0	0	0	1	0	0	0	0	0	0	0	0	0	0	0	0	0	0	0	0	0	0	0	0	0	0	0	0	0	0	0	0	0	0	0
NC_007530	765499	TGAAGGGTAT.AGCATATAAA	A	C	40	PASS	NA	GT	0	1	1	1	1	1	1	1	1	1	1	1	1	1	1	1	1	1	1	1	1	1	1	1	1	1	1	1	1	1	1	1	1	1	1	1	1	1	1	1	1
NC_007530	765508	TAGCATATAA.ACCGATGAGT	A	C	40	PASS	NA	GT	0	0	0	0	0	0	0	0	1	0	0	0	0	0	0	0	0	0	0	0	0	0	0	0	0	0	0	0	0	0	0	0	0	0	0	0	0	0	0	0	0
NC_007530	765603	GTAATTGATA.TCATTGTCGG	T	C	40	PASS	NA	GT	0	0	0	0	0	0	0	0	0	0	0	0	0	0	0	0	0	1	0	0	0	0	0	0	0	0	0	0	0	0	0	0	0	0	0	0	0	0	0	0	0
NC_007530	765879	TATTGAATAT.AAGGCAGAAG	A	G	40	PASS	NA	GT	0	0	0	0	0	0	0	0	1	0	0	0	0	0	0	0	0	0	0	0	0	0	0	0	0	0	0	0	0	0	0	0	0	0	0	0	0	0	0	0	0
NC_007530	765880	ATTGAATATA.AGGCAGAAGC	A	C	40	PASS	NA	GT	0	0	0	0	0	0	0	0	1	0	0	0	0	0	0	0	0	0	0	0	0	0	0	0	0	0	0	0	0	0	0	0	0	0	0	0	0	0	0	0	0
NC_007530	767865	GCAATAACTT.CCTAACATAA	C	T	40	PASS	NA	GT	0	0	0	0	0	0	0	0	0	0	0	0	0	0	0	0	0	0	0	0	0	0	0	0	0	0	0	0	0	0	0	0	0	0	0	0	0	0	0	0	0
NC_007530	768739	TAAAATGGTA.TATAGTTAAA	T	A	40	PASS	NA	GT	0	0	0	0	0	0	0	0	0	0	0	0	0	0	0	0	0	0	0	0	0	0	0	0	0	0	0	0	0	0	0	0	0	0	0	0	0	0	0	0	0
NC_007530	770733	ACGGAACTTA.CCTTTTGCCA	C	G	40	PASS	NA	GT	0	0	0	0	0	0	0	0	1	0	0	0	0	0	0	0	0	0	0	0	0	0	0	0	0	0	0	0	0	0	0	0	0	0	0	0	0	0	0	0	0
NC_007530	770735	GGAACTTACC.TTTTGCCACT	T	G	40	PASS	NA	GT	0	0	0	0	0	0	0	0	1	0	0	0	0	0	0	0	0	0	0	0	0	0	0	0	0	0	0	0	0	0	0	0	0	0	0	0	0	0	0	0	0
NC_007530	778110	AAGAATCCTG.GTTTTTAATG	G	T	40	PASS	NA	GT	0	1	1	1	1	1	1	1	1	1	1	1	1	1	1	1	1	1	1	1	1	1	1	1	1	1	1	1	1	1	1	1	1	1	1	1	1	1	1	1	1
NC_007530	780595	CTTCTACATG.CGACTTTTGA	C	T	40	PASS	NA	GT	0	0	0	0	1	1	0	0	0	0	0	0	0	0	0	0	0	0	0	0	0	0	0	0	0	0	0	0	0	0	0	0	0	0	0	0	0	0	0	0	0
NC_007530	781216	TTGTCCAGCG.ACAGTGTAGA	A	T	40	PASS	NA	GT	0	0	0	0	0	0	0	0	1	0	0	0	0	0	0	0	0	0	0	0	0	0	0	0	0	0	0	0	0	0	0	0	0	0	0	0	0	0	0	0	0
NC_007530	782220	AAAATAATAA.AGTTAATTTC	A	G	40	LCB	NA	GT	0	0	0	0	0	0	0	0	0	0	0	0	0	0	0	0	0	0	0	0	0	0	0	0	0	0	0	0	0	0	0	0	0	0	0	0	0	0	0	0	0
NC_007530	782900	GTATGTTAAC.TTTCGGAATA	T	A	40	PASS	NA	GT	0	0	0	0	0	0	0	0	0	1	0	0	0	0	0	0	0	0	0	0	0	0	0	0	0	0	0	0	0	0	0	0	0	0	0	0	0	0	0	0	0
NC_007530	785343	AATCGACTTT.ACTAATTTAA	A	C	40	PASS	NA	GT	0	0	0	0	0	0	0	0	0	1	0	0	0	0	0	0	0	0	0	0	0	0	0	0	0	0	0	0	0	0	0	0	0	0	0	0	0	0	0	0	0
NC_007530	785973	AATGTGAAAT.ACTTGTGAAC	A	G	40	PASS	NA	GT	0	0	0	0	0	0	0	0	0	0	0	0	0	0	0	0	0	0	0	0	0	0	0	0	0	0	0	0	0	0	0	0	0	0	1	1	0	0	0	0	0
NC_007530	787706	TTGTACAGCC.ATCAAAAACG	A	T	40	PASS	NA	GT	0	0	0	0	0	0	0	0	0	1	0	0	0	0	0	0	0	0	0	0	0	0	0	0	0	0	0	0	0	0	0	0	0	0	0	0	0	0	0	0	0
NC_007530	787707	TGTACAGCCA.TCAAAAACGA	T	C	40	PASS	NA	GT	0	0	0	0	0	0	0	0	0	1	0	0	0	0	0	0	0	0	0	0	0	0	0	0	0	0	0	0	0	0	0	0	0	0	0	0	0	0	0	0	0
NC_007530	787742	ACCTCGGTAT.TAAAATGTTT	T	C	40	PASS	NA	GT	0	0	0	0	0	0	0	0	0	1	0	0	0	0	0	0	0	0	0	0	0	0	0	0	0	0	0	0	0	0	0	0	0	0	0	0	0	0	0	0	0
NC_007530	788093	AAGGAATCGA.GCTCGATTTA	G	T	40	PASS	NA	GT	0	0	1	0	0	0	0	0	0	0	0	0	0	0	0	0	0	0	0	0	0	0	0	0	0	0	0	0	0	0	0	0	0	0	0	0	0	0	0	0	0
NC_007530	788855	AGCAATAAGA.CATGCTGAAA	C	T	40	PASS	NA	GT	0	0	0	0	0	0	0	0	0	0	0	0	0	0	0	0	0	0	0	0	0	0	0	0	0	0	0	0	0	0	0	0	0	0	0	0	0	0	0	0	0
NC_007530	789298	TTCGGCAGTT.GCGTATTGAT	G	A	40	PASS	NA	GT	0	1	1	1	1	1	1	1	1	1	1	1	1	1	1	1	1	1	1	1	1	1	1	1	1	1	1	1	1	1	1	1	1	1	1	1	1	1	1	1	1
NC_007530	790153	AAATGATAAT.GATAAAAGCG	G	T	40	PASS	NA	GT	0	0	0	0	0	0	0	0	1	0	0	0	0	0	0	0	0	0	0	0	0	0	0	0	0	0	0	0	0	0	0	0	0	0	0	0	0	0	0	0	0
NC_007530	790702	ACGAGTTAAT.AAAAGTGGTA	A	C	40	PASS	NA	GT	0	0	0	0	0	0	0	0	1	0	0	0	0	0	0	0	0	0	0	0	0	0	0	0	0	0	0	0	0	0	0	0	0	0	0	0	0	0	0	0	0
NC_007530	790703	CGAGTTAATA.AAAGTGGTAC	A	T	40	PASS	NA	GT	0	0	0	0	0	0	0	0	1	0	0	0	0	0	0	0	0	0	0	0	0	0	0	0	0	0	0	0	0	0	0	0	0	0	0	0	0	0	0	0	0
NC_007530	791550	GATACAGCGG.CAGCGCTAGG	C	T	40	PASS	NA	GT	0	0	0	0	0	0	0	0	0	0	0	0	0	0	0	0	0	0	0	0	0	0	0	0	0	0	0	0	0	0	0	0	0	0	0	0	0	0	0	1	0
NC_007530	791659	GTCTAAGTTC.TTTTTTATTT	T	A	40	PASS	NA	GT	0	0	0	0	0	0	0	0	0	0	0	0	0	0	0	0	0	0	0	0	0	0	0	0	0	0	0	0	0	0	0	0	0	0	0	0	0	0	0	0	0
NC_007530	791738	TATACCCATA.CAGGTATATG	C	A	40	PASS	NA	GT	0	0	0	0	0	0	0	0	0	0	0	0	0	0	0	0	0	0	0	0	0	0	0	0	0	0	0	0	0	0	0	0	0	0	0	0	0	0	0	0	0
NC_007530	791840	GCGGAGTTGC.GGGCGGGGCC	G	C	40	PASS	NA	GT	0	1	1	1	1	1	1	1	1	1	1	1	1	1	1	1	1	1	1	1	1	1	1	1	1	1	1	1	1	1	1	1	1	1	1	1	1	1	1	1	1
NC_007530	792194	AAGAAGCGAA.AGCACTGTTT	A	G	40	PASS	NA	GT	0	0	0	0	0	0	0	0	1	0	0	0	0	0	0	0	0	0	0	0	0	0	0	0	0	0	0	0	0	0	0	0	0	0	0	0	0	0	0	0	0
NC_007530	794219	ATATTTTGAT.GCATTACGTT	G	T	40	PASS	NA	GT	0	0	0	0	0	0	0	0	1	0	0	0	0	0	0	0	0	0	0	0	0	0	0	0	0	0	0	0	0	0	0	0	0	0	0	0	0	0	0	0	0
NC_007530	794265	TGAGGTTGTG.AAATATCCTC	A	T	40	PASS	NA	GT	0	0	0	0	0	0	0	0	0	1	0	0	0	0	0	0	0	0	0	0	0	0	0	0	0	0	0	0	0	0	0	0	0	0	0	0	0	0	0	0	0
NC_007530	794863	AGCAGTTAAC.AGAGGCTGGA	A	T	40	PASS	NA	GT	0	0	0	0	0	0	0	0	1	0	0	0	0	0	0	0	0	0	0	0	0	0	0	0	0	0	0	0	0	0	0	0	0	0	0	0	0	0	0	0	0
NC_007530	795944	GCCATGACAT.CGTAAAGCAT	C	G	40	PASS	NA	GT	0	0	0	0	0	0	0	0	1	0	0	0	0	0	0	0	0	0	0	0	0	0	0	0	0	0	0	0	0	0	0	0	0	0	0	0	0	0	0	0	0
NC_007530	796521	AGAAGCGTGT.AACATTCCAC	A	C	40	PASS	NA	GT	0	0	0	0	0	0	0	0	0	1	0	0	0	0	0	0	0	0	0	0	0	0	0	0	0	0	0	0	0	0	0	0	0	0	0	0	0	0	0	0	0
NC_007530	798126	CTAATTTATA.TAGCATTCTC	T	C	40	PASS	NA	GT	0	0	0	0	0	0	0	0	0	0	0	0	0	0	0	0	0	0	0	0	0	0	0	0	0	0	0	0	0	0	0	0	0	0	0	0	0	0	0	0	0
NC_007530	798171	TAAAGTTTGG.TTCTGAGAAT	T	A	40	PASS	NA	GT	0	0	0	0	0	0	0	0	1	0	0	0	0	0	0	0	0	0	0	0	0	0	0	0	0	0	0	0	0	0	0	0	0	0	0	0	0	0	0	0	0
NC_007530	798172	AAAGTTTGGT.TCTGAGAATG	T	G	40	PASS	NA	GT	0	0	0	0	0	0	0	0	1	0	0	0	0	0	0	0	0	0	0	0	0	0	0	0	0	0	0	0	0	0	0	0	0	0	0	0	0	0	0	0	0
NC_007530	799864	TTTCCTGTAC.TCCTTCATTT	T	G	40	PASS	NA	GT	0	1	0	0	0	0	0	1	0	0	1	1	1	1	0	0	0	0	0	0	0	0	0	0	0	0	0	0	0	0	0	0	0	0	0	0	0	1	0	0	0
NC_007530	800122	TTACTTATTT.CTTCTATATA	C	T	40	PASS	NA	GT	0	0	0	0	0	0	0	0	0	0	0	0	0	0	0	0	0	0	0	0	0	0	0	0	0	0	0	0	0	0	0	0	0	0	0	0	0	0	0	0	0
NC_007530	801331	ATCACCTGAA.CAGCTACGTT	C	G	40	PASS	NA	GT	0	0	0	0	0	0	0	0	1	0	0	0	0	0	0	0	0	0	0	0	0	0	0	0	0	0	0	0	0	0	0	0	0	0	0	0	0	0	0	0	0
NC_007530	801809	TCAGCCATAC.GAATAATCTC	G	C	40	PASS	NA	GT	0	0	0	0	0	0	0	0	0	1	0	0	0	0	0	0	0	0	0	0	0	0	0	0	0	0	0	0	0	0	0	0	0	0	0	0	0	0	0	0	0
NC_007530	802326	CAATACCTAG.AATTGGATTA	A	C	40	PASS	NA	GT	0	0	0	0	0	0	0	0	0	1	0	0	0	0	0	0	0	0	0	0	0	0	0	0	0	0	0	0	0	0	0	0	0	0	0	0	0	0	0	0	0
NC_007530	802337	ATTGGATTAT.CACTCATGCT	C	T	40	PASS	NA	GT	0	0	0	0	0	0	0	0	0	0	0	0	0	0	0	0	0	0	0	0	0	0	0	0	0	0	0	0	1	0	0	0	0	0	0	0	0	0	0	0	0
NC_007530	802560	ATGCAGTAAC.AGTCGTACCG	A	T	40	PASS	NA	GT	0	1	1	1	1	1	1	1	1	1	1	1	1	1	1	1	1	1	1	1	1	1	1	1	1	1	1	1	1	1	1	1	1	1	1	1	1	1	1	1	1
NC_007530	807724	TTATATGATA.TTATGTCTAG	T	C	40	PASS	NA	GT	0	0	0	0	0	0	0	0	1	0	0	0	0	0	0	0	0	0	0	0	0	0	0	0	0	0	0	0	0	0	0	0	0	0	0	0	0	0	0	0	0
NC_007530	807725	TATATGATAT.TATGTCTAGT	T	C	40	PASS	NA	GT	0	0	0	0	0	0	0	0	1	0	0	0	0	0	0	0	0	0	0	0	0	0	0	0	0	0	0	0	0	0	0	0	0	0	0	0	0	0	0	0	0
NC_007530	807753	GATAGAGAAA.TTAACGCATG	T	A	40	PASS	NA	GT	0	0	0	0	0	0	0	0	1	0	0	0	0	0	0	0	0	0	0	0	0	0	0	0	0	0	0	0	0	0	0	0	0	0	0	0	0	0	0	0	0
NC_007530	807975	CGCGAGAAGT.ATAGCGCTTG	A	G	40	PASS	NA	GT	0	1	1	1	1	1	1	1	1	1	1	1	1	1	1	1	1	1	1	1	1	1	1	1	1	1	1	1	1	1	1	1	1	1	1	1	1	1	1	1	1
NC_007530	808689	AAGATTGCCG.GACAGCGACA	G	A	40	PASS	NA	GT	0	0	0	0	0	1	0	0	0	0	0	0	0	0	0	0	0	0	0	0	0	0	0	0	0	0	0	0	0	0	0	0	0	0	0	0	0	0	0	0	0
NC_007530	809864	TTACTATCCG.TTCTTCAAAA	T	C	40	PASS	NA	GT	0	0	0	0	0	0	0	0	0	0	0	0	0	0	0	0	0	0	0	0	1	0	0	0	0	0	0	0	0	0	0	0	0	0	0	0	0	0	0	0	0
NC_007530	810594	TCGCATCAAG.CGAATAAGTC	C	G	40	PASS	NA	GT	0	0	0	0	0	0	0	0	1	0	0	0	0	0	0	0	0	0	0	0	0	0	0	0	0	0	0	0	0	0	0	0	0	0	0	0	0	0	0	0	0
NC_007530	810747	AACATCGGCC.CATGGGATAT	C	T	40	PASS	NA	GT	0	0	0	0	0	0	0	0	0	0	0	0	0	0	0	0	0	0	0	0	0	0	0	0	0	0	0	0	0	0	0	0	1	1	0	0	0	0	0	0	0
NC_007530	812271	GCTTTACCTG.TTAAGTAAGG	T	C	40	PASS	NA	GT	0	0	0	0	0	0	0	0	0	0	0	0	0	0	0	0	0	0	0	0	0	0	0	0	1	0	0	1	0	0	0	0	0	0	0	0	0	0	0	0	0
NC_007530	813424	TTGAGACGAT.CCAAGCGAAG	C	A	40	PASS	NA	GT	0	0	1	0	0	0	0	0	0	0	0	0	0	0	0	0	0	0	0	0	0	0	0	0	0	0	0	0	0	0	0	0	0	0	0	0	0	0	0	0	0
NC_007530	813689	CGTAAATTCA.CCTAAGTCTT	C	T	40	PASS	NA	GT	0	1	0	0	0	0	0	1	0	0	1	1	1	1	0	0	0	0	0	0	0	0	0	0	0	0	0	0	0	0	0	0	0	0	0	0	0	1	0	0	0
NC_007530	814022	TGCTTGGTTT.AACTCACTGT	A	C	40	PASS	NA	GT	0	0	0	0	0	0	0	0	1	0	0	0	0	0	0	0	0	0	0	0	0	0	0	0	0	0	0	0	0	0	0	0	0	0	0	0	0	0	0	0	0
NC_007530	814024	CTTGGTTTAA.CTCACTGTCG	C	A	40	PASS	NA	GT	0	0	0	0	0	0	0	0	1	0	0	0	0	0	0	0	0	0	0	0	0	0	0	0	0	0	0	0	0	0	0	0	0	0	0	0	0	0	0	0	0
NC_007530	814264	AAATCGTTAC.TTCGTTATCT	T	A	40	PASS	NA	GT	0	0	0	0	0	0	0	0	1	0	0	0	0	0	0	0	0	0	0	0	0	0	0	0	0	0	0	0	0	0	0	0	0	0	0	0	0	0	0	0	0
NC_007530	814842	TCGGTAATAA.CATAAAGTTT	C	T	40	PASS	NA	GT	0	0	0	0	0	0	0	0	0	1	0	0	0	0	0	0	0	0	0	0	0	0	0	0	0	0	0	0	0	0	0	0	0	0	0	0	0	0	0	0	0
NC_007530	815023	AATAGAAGTG.AATTCTCCCT	A	G	40	PASS	NA	GT	0	0	0	0	0	0	0	0	1	0	0	0	0	0	0	0	0	0	0	0	0	0	0	0	0	0	0	0	0	0	0	0	0	0	0	0	0	0	0	0	0
NC_007530	815759	TTTCAAGCTG.TGATTCTAAT	T	C	40	PASS	NA	GT	0	0	0	0	0	0	0	0	0	0	0	0	0	0	0	0	0	0	0	0	0	0	0	0	0	0	0	0	0	0	0	0	0	0	0	0	0	0	0	0	0
NC_007530	815933	CTTGTTTAGC.AGCAGGGTCA	A	T	40	PASS	NA	GT	0	0	0	0	0	0	0	0	1	0	0	0	0	0	0	0	0	0	0	0	0	0	0	0	0	0	0	0	0	0	0	0	0	0	0	0	0	0	0	0	0
NC_007530	817213	AGAAAATTAA.GAATAAAATT	G	A	40	PASS	NA	GT	0	0	0	0	0	0	0	0	1	0	0	0	0	0	0	0	0	0	0	0	0	0	0	0	0	0	0	0	0	0	0	0	0	0	0	0	0	0	0	0	0
NC_007530	817490	ATTATAAAGA.AACGATTATT	A	G	40	PASS	NA	GT	0	0	0	0	0	0	0	0	0	0	0	0	0	1	0	0	0	0	0	0	0	0	0	0	0	0	0	0	0	0	0	0	0	0	0	0	0	0	0	0	0
NC_007530	819784	GTTAAAAATA.GAGCGGCAAT	G	T	40	PASS	NA	GT	0	0	1	0	0	0	0	0	0	0	0	0	0	0	0	0	0	0	0	0	0	0	0	0	0	0	0	0	0	0	0	0	0	0	0	0	0	0	0	0	0
NC_007530	819963	GTCACCAACA.GGTTCTGCAA	G	T	40	PASS	NA	GT	0	0	1	0	0	0	0	0	0	0	0	0	0	0	0	0	0	0	0	0	0	0	0	0	0	0	0	0	0	0	0	0	0	0	0	0	0	0	0	0	0
NC_007530	820724	ATAAATCTTT.CGATCGCGTT	C	A	40	PASS	NA	GT	0	0	0	0	0	0	0	0	0	0	0	0	0	0	0	0	0	0	0	0	0	0	0	0	0	0	0	0	0	0	0	0	0	0	0	0	0	0	0	0	0
NC_007530	821008	GATCAAGACC.GGCTGCCTTC	G	A	40	PASS	NA	GT	0	1	1	1	1	1	1	1	1	1	1	1	1	1	1	1	1	1	1	1	1	1	1	1	1	1	1	1	1	1	1	1	1	1	1	1	1	1	1	1	1
NC_007530	822053	TTAGGTGGGC.GGGAAAAAGG	G	T	40	PASS	NA	GT	0	0	0	0	0	0	0	0	0	0	0	0	0	0	0	0	0	0	0	0	0	0	0	0	0	0	0	0	0	0	0	0	0	0	0	0	0	0	0	1	1
NC_007530	823397	CAAAGTTACG.GATAATAGCT	G	A	40	PASS	NA	GT	0	0	0	0	0	0	0	0	0	0	0	0	0	0	0	0	0	0	0	0	0	0	0	0	0	0	0	0	0	0	0	0	0	0	0	0	0	0	0	0	0
NC_007530	823643	TAATAATGTA.CTTATGAGGT	C	G	40	PASS	NA	GT	0	0	0	0	0	0	0	0	0	1	0	0	0	0	0	0	0	0	0	0	0	0	0	0	0	0	0	0	0	0	0	0	0	0	0	0	0	0	0	0	0
NC_007530	823920	AATTTCCTAT.ACGTTTTTTG	A	T	40	PASS	NA	GT	0	0	0	0	0	0	0	0	0	0	0	0	0	0	0	0	0	0	0	0	0	0	0	0	0	0	0	0	0	0	0	0	0	0	0	0	0	0	0	0	0
NC_007530	824192	TGTATACAAA.GAGAGGAGAA	G	T	40	PASS	NA	GT	0	0	1	0	0	0	0	0	0	0	0	0	0	0	0	0	0	0	0	0	0	0	0	0	0	0	0	0	0	0	0	0	0	0	0	0	0	0	0	0	0
NC_007530	824540	TTTTTAAAGC.AGTTTTCTTA	A	T	40	PASS	NA	GT	0	0	0	0	0	0	0	0	1	0	0	0	0	0	0	0	0	0	0	0	0	0	0	0	0	0	0	0	0	0	0	0	0	0	0	0	0	0	0	0	0
NC_007530	824671	AGCTGGAACA.CTTGGCGGAA	C	T	40	LCB	NA	GT	0	0	1	1	1	1	1	0	0	0	0	0	0	0	0	0	1	0	0	0	0	1	0	0	0	0	0	0	0	0	0	0	0	0	0	0	0	0	0	0	0
NC_007530	826086	ACTAACTGAC.TGTAAGTCTT	T	C	40	PASS	NA	GT	0	0	0	0	0	0	0	0	0	0	0	0	0	0	0	0	0	0	0	0	0	0	0	0	0	0	0	0	0	0	0	0	0	0	0	0	0	0	0	0	0
NC_007530	827055	GTAGGTGATT.TCACAGATAC	T	C	40	PASS	NA	GT	0	0	0	0	0	0	0	0	1	0	0	0	0	0	0	0	0	0	0	0	0	0	0	0	0	0	0	0	0	0	0	0	0	0	0	0	0	0	0	0	0
NC_007530	827195	CGCACAGAAG.CGTTTCTTAG	C	T	40	PASS	NA	GT	0	0	0	0	0	0	0	0	0	0	0	0	0	0	0	1	0	0	0	0	0	0	0	0	0	0	0	0	0	0	0	0	0	0	0	0	0	0	0	0	0
NC_007530	828447	GGAAATGTTG.AATTGTGGGC	A	G	40	PASS	NA	GT	0	0	0	0	0	0	0	0	0	0	0	0	0	0	0	0	0	0	0	0	0	0	0	0	0	0	0	0	0	0	0	0	0	0	0	0	0	0	0	0	0
NC_007530	828452	TGTTGAATTG.TGGGCTCATA	T	C	40	PASS	NA	GT	0	0	0	0	0	0	0	0	0	0	0	0	0	0	0	0	0	0	0	1	0	0	0	0	0	0	0	0	0	0	0	0	0	0	0	0	0	0	0	0	0
NC_007530	828536	AACGTATAAC.GGAAGTGAAG	G	A	40	PASS	NA	GT	0	0	0	0	0	0	0	0	1	0	0	0	0	0	0	0	0	0	0	0	0	0	0	0	0	0	0	0	0	0	0	0	0	0	0	0	0	0	0	0	0
NC_007530	828612	TCTCATCCGA.ACGTACCGTT	A	T	40	PASS	NA	GT	0	0	0	0	0	0	0	0	0	1	0	0	0	0	0	0	0	0	0	0	0	0	0	0	0	0	0	0	0	0	0	0	0	0	0	0	0	0	0	0	0
NC_007530	830653	CGGTAATGAT.GAGTAAAATA	G	T	40	PASS	NA	GT	0	0	0	0	0	0	0	0	0	0	0	0	0	0	0	0	1	0	0	0	0	0	0	0	0	0	0	0	0	0	0	0	0	0	0	0	0	0	0	0	0
NC_007530	830883	GTATACACAC.TGCCTGAGAC	T	A	40	PASS	NA	GT	0	0	0	0	0	0	0	0	0	1	0	0	0	0	0	0	0	0	0	0	0	0	0	0	0	0	0	0	0	0	0	0	0	0	0	0	0	0	0	0	0
NC_007530	830884	TATACACACT.GCCTGAGACA	G	A	40	PASS	NA	GT	0	0	0	0	0	0	0	0	0	1	0	0	0	0	0	0	0	0	0	0	0	0	0	0	0	0	0	0	0	0	0	0	0	0	0	0	0	0	0	0	0
NC_007530	831684	TAGCGGCTGG.TGGAATTATT	T	G	40	PASS	NA	GT	0	0	0	0	0	0	0	0	0	0	0	0	0	0	0	0	0	0	0	0	0	0	0	0	0	0	0	0	0	1	0	0	0	0	0	0	0	0	0	0	0
NC_007530	832991	GAACGCAACC.GTAAGAAGTG	G	A	40	PASS	NA	GT	0	0	0	0	0	1	0	0	0	0	0	0	0	0	0	0	0	0	0	0	0	0	0	0	0	0	0	0	0	0	0	0	0	0	0	0	0	0	0	0	0
NC_007530	833058	AATATGGATC.AATTTTCACC	A	G	40	PASS	NA	GT	0	0	0	0	0	0	0	0	0	0	0	0	0	0	0	0	0	0	0	0	0	0	0	0	0	1	0	0	0	0	0	0	0	0	0	0	0	0	0	0	0
NC_007530	833726	AGAACAAGAT.CATCGTATTG	C	T	40	PASS	NA	GT	0	0	0	0	0	0	0	0	0	0	0	0	0	0	0	0	0	0	0	0	0	0	0	0	0	0	0	0	1	0	0	0	0	0	0	0	0	0	0	0	0
NC_007530	833791	TATATGTGAT.TACCTTTAAT	T	C	40	PASS	NA	GT	0	0	0	0	0	1	0	0	0	0	0	0	0	0	0	0	0	0	0	0	0	0	0	0	0	0	0	0	0	0	0	0	0	0	0	0	0	0	0	0	0
NC_007530	838949	TTCAAGGTGG.AGATACTGGT	A	C	40	PASS	NA	GT	0	0	0	0	0	0	0	0	1	0	0	0	0	0	0	0	0	0	0	0	0	0	0	0	0	0	0	0	0	0	0	0	0	0	0	0	0	0	0	0	0
NC_007530	840050	TATATTCTTT.TGTATAATGG	T	N	40	N	NA	GT	0	0	0	0	0	0	0	0	0	0	0	0	0	0	0	0	0	0	0	0	0	0	0	0	0	0	0	0	0	0	0	0	0	0	0	0	0	0	0	0	0
NC_007530	840654	GAAATGAGGA.ACCGAGCATC	A	C	40	PASS	NA	GT	0	0	0	0	0	0	0	0	1	0	0	0	0	0	0	0	0	0	0	0	0	0	0	0	0	0	0	0	0	0	0	0	0	0	0	0	0	0	0	0	0
NC_007530	842294	TATCTCCTAA.CAAGTTGTTA	C	A	40	PASS	NA	GT	0	0	0	0	0	0	0	0	0	0	0	0	0	0	0	0	0	0	0	0	0	0	0	0	0	0	0	0	0	0	0	0	0	0	0	0	0	0	0	0	0
NC_007530	842534	ATTTATATTT.TCCTTCTAAG	T	C	40	PASS	NA	GT	0	0	0	0	0	0	0	0	1	0	0	0	0	0	0	0	0	0	0	0	0	0	0	0	0	0	0	0	0	0	0	0	0	0	0	0	0	0	0	0	0
NC_007530	843229	ATGGTATTGG.TCATTCTTTT	T	G	40	PASS	NA	GT	0	0	0	0	0	0	0	0	0	0	0	0	0	0	0	0	0	0	0	0	0	0	0	0	0	0	0	0	0	0	0	0	0	0	0	0	0	0	0	0	0
NC_007530	845194	TTTGATAATA.CGTTGCCAAA	C	T	40	LCB	NA	GT	0	0	0	0	1	0	0	0	0	0	0	0	0	0	0	0	0	0	0	0	0	0	0	0	0	0	0	0	0	0	0	0	0	0	0	0	0	0	0	0	0
NC_007530	845604	AGAACCATCA.AGTGAAAACA	A	C	40	PASS	NA	GT	0	0	0	0	0	0	0	0	0	1	0	0	0	0	0	0	0	0	0	0	0	0	0	0	0	0	0	0	0	0	0	0	0	0	0	0	0	0	0	0	0
NC_007530	847735	TCTTTAATAA.AATCTTTACG	A	G	40	PASS	NA	GT	0	0	0	0	0	0	0	0	1	0	0	0	0	0	0	0	0	0	0	0	0	0	0	0	0	0	0	0	0	0	0	0	0	0	0	0	0	0	0	0	0
NC_007530	850210	AGCAATTTTT.TTACTCATTC	T	G	40	PASS	NA	GT	0	0	0	0	0	0	0	0	1	0	0	0	0	0	0	0	0	0	0	0	0	0	0	0	0	0	0	0	0	0	0	0	0	0	0	0	0	0	0	0	0
NC_007530	850211	GCAATTTTTT.TACTCATTCT	T	C	40	PASS	NA	GT	0	0	0	0	0	0	0	0	1	0	0	0	0	0	0	0	0	0	0	0	0	0	0	0	0	0	0	0	0	0	0	0	0	0	0	0	0	0	0	0	0
NC_007530	850519	TTAATGGAAT.TATTGAACTG	T	C	40	PASS	NA	GT	0	1	1	1	1	1	1	1	1	1	1	1	1	1	1	1	1	1	1	1	1	1	1	1	1	1	1	1	1	1	1	1	1	1	1	1	1	1	1	1	1
NC_007530	850657	TCAGCTTTAA.AAATAGTATT	A	T	40	PASS	NA	GT	0	0	0	0	0	0	0	0	0	1	0	0	0	0	0	0	0	0	0	0	0	0	0	0	0	0	0	0	0	0	0	0	0	0	0	0	0	0	0	0	0
NC_007530	852414	CCTTGCCTTT.TAAGATAATT	T	G	40	PASS	NA	GT	0	0	0	0	0	0	0	0	1	0	0	0	0	0	0	0	0	0	0	0	0	0	0	0	0	0	0	0	0	0	0	0	0	0	0	0	0	0	0	0	0
NC_007530	853544	AGCTATATAG.TAAACCGTTA	T	C	40	PASS	NA	GT	0	0	0	0	0	0	0	0	0	0	0	0	0	0	0	0	0	0	0	0	0	0	0	0	0	0	0	0	0	0	0	0	0	0	0	0	0	0	0	0	1
NC_007530	853778	TTACGAATAA.ACCAATTCCG	A	G	40	PASS	NA	GT	0	0	0	0	0	0	0	0	1	0	0	0	0	0	0	0	0	0	0	0	0	0	0	0	0	0	0	0	0	0	0	0	0	0	0	0	0	0	0	0	0
NC_007530	853893	CCGCATTTCA.TTTTTATACG	T	C	40	PASS	NA	GT	0	0	0	0	1	1	0	0	0	0	0	0	0	0	0	0	0	0	0	0	0	0	0	0	0	0	0	0	0	0	0	0	0	0	0	0	0	0	0	0	0
NC_007530	854120	AAGGGAAGAA.ACCTTCTTTT	A	T	40	PASS	NA	GT	0	0	0	0	0	0	0	0	1	0	0	0	0	0	0	0	0	0	0	0	0	0	0	0	0	0	0	0	0	0	0	0	0	0	0	0	0	0	0	0	0
NC_007530	854397	AACAGCACGG.TTTGATAAAA	T	C	40	PASS	NA	GT	0	0	0	0	0	0	0	0	0	0	0	0	0	0	0	0	0	0	0	0	0	0	0	0	0	0	0	0	0	0	0	0	0	0	0	0	0	0	0	0	0
NC_007530	855665	TCATAAACAT.TCAGTAATAG	T	A	40	PASS	NA	GT	0	0	0	0	0	0	0	0	1	0	0	0	0	0	0	0	0	0	0	0	0	0	0	0	0	0	0	0	0	0	0	0	0	0	0	0	0	0	0	0	0
NC_007530	856659	AAAACGCGAG.GCGAAAGCAA	G	A	40	PASS	NA	GT	0	0	0	0	0	0	0	0	1	0	0	0	0	0	0	0	0	0	0	0	0	0	0	0	0	0	0	0	0	0	0	0	0	0	0	0	0	0	0	0	0
NC_007530	856668	GGCGAAAGCA.ACAATTAATC	A	G	40	PASS	NA	GT	0	0	0	0	0	0	0	0	0	0	0	0	0	0	0	0	0	0	0	0	0	0	0	0	0	0	0	0	0	0	0	0	0	0	0	0	0	0	0	0	0
NC_007530	856728	AGAAGCTGTC.GCTAATTTAA	G	T	40	PASS	NA	GT	0	0	0	0	0	0	0	0	0	0	0	0	0	0	0	1	0	0	0	0	0	0	0	0	0	0	0	0	0	0	0	0	0	0	0	0	0	0	0	0	0
NC_007530	859563	TTATAAAAAG.CGTACGTTGC	C	G	40	PASS	NA	GT	0	0	0	0	0	0	0	0	0	0	0	0	0	0	0	0	0	0	0	0	0	0	0	0	0	0	0	0	0	0	0	0	0	0	0	0	0	0	0	0	0
NC_007530	861579	CGCAATGAAA.GTAAAAGGAA	G	T	40	PASS	NA	GT	0	0	1	0	0	0	0	0	0	0	0	0	0	0	0	0	0	0	0	0	0	0	0	0	0	0	0	0	0	0	0	0	0	0	0	0	0	0	0	0	0
NC_007530	861912	TAAGGCGGTG.CAAGTGTATA	C	T	40	PASS	NA	GT	0	0	0	0	0	0	0	0	0	0	0	0	0	0	0	0	0	0	0	0	0	0	0	0	0	0	0	0	0	1	0	1	0	0	0	0	1	0	0	0	0
NC_007530	863516	GTACAAAACG.CAAATGGAAG	C	A	40	PASS	NA	GT	0	0	0	0	0	0	0	0	0	0	0	0	0	0	0	0	0	0	0	0	0	0	0	0	0	0	0	0	0	0	0	0	0	0	0	0	0	0	0	0	0
NC_007530	865406	TTGAGAAGGG.CGAGGTTGTT	C	G	40	PASS	NA	GT	0	0	0	0	0	0	0	0	0	0	0	0	0	0	0	0	0	0	1	0	0	0	0	0	0	0	0	0	0	0	0	0	0	0	0	0	0	0	0	0	0
NC_007530	866074	AAGGAAGGTC.TCAAGGCATA	T	C	40	PASS	NA	GT	0	0	0	0	0	0	0	0	0	0	0	0	0	0	0	0	0	0	0	0	0	0	0	0	0	0	0	0	0	0	0	0	0	0	0	0	0	0	0	0	0
NC_007530	866125	TTTGTGGAAT.CCGCCAAGGC	C	T	40	PASS	NA	GT	0	0	0	0	0	0	0	0	0	0	0	0	0	0	0	0	0	1	0	0	0	0	0	0	0	0	0	0	0	0	0	0	0	0	0	0	0	0	0	0	0
NC_007530	867050	TCTTTTGTAT.AGCGCAAAGA	A	C	40	PASS	NA	GT	0	1	1	1	1	1	1	1	1	1	1	1	1	1	1	1	1	1	1	1	1	1	1	1	1	1	1	1	1	1	1	1	1	1	1	1	1	1	1	1	1
NC_007530	867293	AATTTATTTT.CAATTTGAAT	C	T	40	PASS	NA	GT	0	0	0	0	0	0	0	0	0	0	0	0	0	0	0	0	0	1	0	0	0	0	0	0	0	0	0	0	0	0	0	0	0	0	0	0	0	0	0	0	0
NC_007530	868815	TCGAATATGG.AGTGGGTATG	A	G	40	PASS	NA	GT	0	0	0	0	0	0	0	0	0	0	0	0	0	0	0	0	0	0	0	0	0	0	0	0	0	0	0	0	0	0	0	0	0	1	0	0	0	0	0	0	0
NC_007530	869047	TCTTTTGTTT.TTAATAACAG	T	A	40	PASS	NA	GT	0	0	0	0	0	0	0	0	0	1	0	0	0	0	0	0	0	0	0	0	0	0	0	0	0	0	0	0	0	0	0	0	0	0	0	0	0	0	0	0	0
NC_007530	869392	TTATGATAAA.GCCGAGCGCG	G	T	40	PASS	NA	GT	0	0	1	0	0	0	0	0	0	0	0	0	0	0	0	0	0	0	0	0	0	0	0	0	0	0	0	0	0	0	0	0	0	0	0	0	0	0	0	0	0
NC_007530	869675	AATCATTTAG.CAATAAAAAT	C	A	40	PASS	NA	GT	0	0	1	0	0	0	0	0	0	0	0	0	0	0	0	0	0	0	0	0	0	0	0	0	0	0	0	0	0	0	0	0	0	0	0	0	0	0	0	0	0
NC_007530	874117	TATTTAGTAA.CGGTATGCAA	C	A	40	PASS	NA	GT	0	0	0	0	0	0	0	0	0	0	0	0	0	0	0	0	0	0	0	0	0	0	0	0	0	0	0	0	0	0	0	0	0	0	0	0	0	0	0	0	0
NC_007530	874122	AGTAACGGTA.TGCAAACGTT	T	C	40	PASS	NA	GT	0	0	0	0	0	0	0	0	0	0	0	0	0	0	0	0	0	0	0	0	0	0	0	0	0	0	0	0	0	0	0	0	0	0	0	0	0	0	0	0	0
NC_007530	874127	CGGTATGCAA.ACGTTAGGTG	A	T	40	PASS	NA	GT	0	0	0	0	0	0	0	0	0	0	0	0	0	0	0	0	0	0	0	0	0	0	0	0	0	0	0	0	0	0	0	0	0	0	0	0	0	0	0	0	0
NC_007530	875662	TGGATTTTTC.TTCGTTTTAT	T	C	40	PASS	NA	GT	0	0	0	0	0	0	0	0	1	0	0	0	0	0	0	0	0	0	0	0	0	0	0	0	0	0	0	0	0	0	0	0	0	0	0	0	0	0	0	0	0
NC_007530	875663	GGATTTTTCT.TCGTTTTATA	T	A	40	PASS	NA	GT	0	0	0	0	0	0	0	0	1	0	0	0	0	0	0	0	0	0	0	0	0	0	0	0	0	0	0	0	0	0	0	0	0	0	0	0	0	0	0	0	0
NC_007530	876148	AGCATGTCCC.GGTGCACCAA	G	T	40	PASS	NA	GT	0	0	1	0	0	0	0	0	0	0	0	0	0	0	0	0	0	0	0	0	0	0	0	0	0	0	0	0	0	0	0	0	0	0	0	0	0	0	0	0	0
NC_007530	878288	CGTCATATGA.CCGTATCTCT	C	G	40	PASS	NA	GT	0	0	0	0	0	0	0	0	1	0	0	0	0	0	0	0	0	0	0	0	0	0	0	0	0	0	0	0	0	0	0	0	0	0	0	0	0	0	0	0	0
NC_007530	878361	TGATGGTGTA.ATTGGGGATG	A	G	40	PASS	NA	GT	0	0	0	0	0	0	0	0	0	0	0	0	0	0	0	0	0	0	0	0	0	0	0	0	0	0	0	0	0	0	0	0	0	0	0	0	0	0	0	0	0
NC_007530	879621	AGAAACGAAA.GCACCAGCGG	G	T	40	PASS	NA	GT	0	0	1	0	0	0	0	0	0	0	0	0	0	0	0	0	0	0	0	0	0	0	0	0	0	0	0	0	0	0	0	0	0	0	0	0	0	0	0	0	0
NC_007530	879774	ACGCTTAGCA.GGCGCAGAAT	G	A	40	PASS	NA	GT	0	0	0	0	0	0	0	0	1	0	0	0	0	0	0	0	0	0	0	0	0	0	0	0	0	0	0	0	0	0	0	0	0	0	0	0	0	0	0	0	0
NC_007530	879916	GAAGGTTATA.AGGCATTAGA	A	T	40	PASS	NA	GT	0	0	0	0	0	0	0	0	0	0	0	0	0	0	0	0	0	0	0	0	0	0	0	0	0	0	0	0	0	0	0	0	0	0	0	0	0	0	0	0	0
NC_007530	883453	TTATGAAGTT.CGTGAAATTG	C	T	40	PASS	NA	GT	0	0	0	0	0	0	0	0	0	0	0	0	0	0	0	0	0	0	0	0	0	0	0	1	0	0	0	0	0	0	0	0	0	0	0	0	0	0	0	0	0
NC_007530	883789	TCGTGAAATG.GGAATGAACA	G	A	40	PASS	NA	GT	0	0	0	0	0	0	0	0	0	0	0	0	0	0	0	0	0	0	0	0	0	0	0	0	0	0	0	0	0	0	0	0	0	0	0	0	0	0	0	0	0
NC_007530	885758	ATAACCGAGA.AGAAGCAAAT	A	C	40	PASS	NA	GT	0	0	0	0	0	0	0	0	1	0	0	0	0	0	0	0	0	0	0	0	0	0	0	0	0	0	0	0	0	0	0	0	0	0	0	0	0	0	0	0	0
NC_007530	886123	AATGCGAGTG.GGAAATTACA	G	T	40	PASS	NA	GT	0	0	0	0	0	0	0	0	1	0	0	0	0	0	0	0	0	0	0	0	0	0	0	0	0	0	0	0	0	0	0	0	0	0	0	0	0	0	0	0	0
NC_007530	887308	TGATTGTTTC.TGGAAAATGG	T	A	40	PASS	NA	GT	0	0	0	0	0	0	0	0	1	0	0	0	0	0	0	0	0	0	0	0	0	0	0	0	0	0	0	0	0	0	0	0	0	0	0	0	0	0	0	0	0
NC_007530	887672	GAGCGGATTG.TTTGGCGGAT	T	A	40	PASS	NA	GT	0	0	0	0	0	0	0	0	1	0	0	0	0	0	0	0	0	0	0	0	0	0	0	0	0	0	0	0	0	0	0	0	0	0	0	0	0	0	0	0	0
NC_007530	889124	GTATTTTTTG.CCGTTCCTAA	C	T	40	PASS	NA	GT	0	0	0	0	0	0	0	0	0	0	0	0	0	0	0	0	0	0	0	0	0	1	0	0	0	0	0	0	0	0	0	0	0	0	0	0	0	0	0	0	0
NC_007530	889501	TTCCATCAAG.CGTTAGCAAT	C	T	40	PASS	NA	GT	0	0	0	0	0	0	0	0	0	0	0	0	0	0	0	0	0	0	0	0	0	0	0	0	0	0	0	0	0	0	0	0	0	0	0	0	0	0	0	0	0
NC_007530	889854	CCAAGGTTTT.GTAGTGTTCG	G	A	40	PASS	NA	GT	0	0	0	0	0	0	0	0	0	1	0	0	0	0	0	0	0	0	0	0	0	0	0	0	0	0	0	0	0	0	0	0	0	0	0	0	0	0	0	0	0
NC_007530	931467	ACGATAATGA.GGCCGACCAT	G	T	40	PASS	NA	GT	0	0	1	0	0	0	0	0	0	0	0	0	0	0	0	0	0	0	0	0	0	0	0	0	0	0	0	0	0	0	0	0	0	0	0	0	0	0	0	0	0
NC_007530	932658	TCATAATAAT.AGAAAAAGGA	A	T	40	PASS	NA	GT	0	0	0	0	0	0	0	0	1	0	0	0	0	0	0	0	0	0	0	0	0	0	0	0	0	0	0	0	0	0	0	0	0	0	0	0	0	0	0	0	0
NC_007530	933522	TTCATATGGA.GAGAGTACTA	G	T	40	PASS	NA	GT	0	0	1	0	0	0	0	0	0	0	0	0	0	0	0	0	0	0	0	0	0	0	0	0	0	0	0	0	0	0	0	0	0	0	0	0	0	0	0	0	0
NC_007530	933588	ACATGACACC.AATACTTGAA	A	T	40	PASS	NA	GT	0	0	0	0	0	0	0	0	1	0	0	0	0	0	0	0	0	0	0	0	0	0	0	0	0	0	0	0	0	0	0	0	0	0	0	0	0	0	0	0	0
NC_007530	934575	CAAATGAAAA.CCATATGTTA	C	A	40	PASS	NA	GT	0	0	0	0	0	0	0	0	0	1	0	0	0	0	0	0	0	0	0	0	0	0	0	0	0	0	0	0	0	0	0	0	0	0	0	0	0	0	0	0	0
NC_007530	935587	GCCCTAACGA.ACAAACAAAT	A	T	40	PASS	NA	GT	0	0	0	0	0	0	0	0	1	0	0	0	0	0	0	0	0	0	0	0	0	0	0	0	0	0	0	0	0	0	0	0	0	0	0	0	0	0	0	0	0
NC_007530	940021	CTCTTTCTGG.ATCTAATAAT	A	G	40	PASS	NA	GT	0	0	0	0	0	0	0	0	1	0	0	0	0	0	0	0	0	0	0	0	0	0	0	0	0	0	0	0	0	0	0	0	0	0	0	0	0	0	0	0	0
NC_007530	941361	TTCCAAAAAC.GAAACGGTCG	G	A	40	PASS	NA	GT	0	0	0	0	0	0	0	0	0	0	0	0	0	0	0	0	0	0	0	0	0	0	1	0	0	0	0	0	0	0	1	0	0	0	0	0	0	0	0	0	0
NC_007530	941796	ATCCTTCCAA.GAGGCACAAA	G	C	40	PASS	NA	GT	0	0	0	0	0	0	0	0	0	1	0	0	0	0	0	0	0	0	0	0	0	0	0	0	0	0	0	0	0	0	0	0	0	0	0	0	0	0	0	0	0
NC_007530	941999	CGGCATCCAA.TACGTAGCCA	T	G	40	PASS	NA	GT	0	0	0	0	0	0	0	0	1	0	0	0	0	0	0	0	0	0	0	0	0	0	0	0	0	0	0	0	0	0	0	0	0	0	0	0	0	0	0	0	0
NC_007530	942282	TCTGCCATTA.AGAGTTATTA	A	T	40	PASS	NA	GT	0	0	0	0	0	0	0	0	1	0	0	0	0	0	0	0	0	0	0	0	0	0	0	0	0	0	0	0	0	0	0	0	0	0	0	0	0	0	0	0	0
NC_007530	945588	ATTCAAAATG.TGGAGGCGGA	T	C	40	PASS	NA	GT	0	0	0	0	0	0	0	0	0	0	0	0	0	0	0	0	0	0	0	0	0	0	0	0	0	0	0	0	0	0	0	0	0	0	0	0	0	0	0	0	0
NC_007530	949890	AAAAAGGCAG.CGGGTATGTT	C	T	40	PASS	NA	GT	0	0	0	0	0	0	0	0	0	0	0	0	0	0	0	0	0	0	0	0	0	0	0	0	0	0	0	0	1	0	0	0	0	0	0	0	0	0	0	0	0
NC_007530	950083	ATATAGCTAT.AACGTTTCAT	A	T	40	PASS	NA	GT	0	0	0	0	0	0	0	0	1	0	0	0	0	0	0	0	0	0	0	0	0	0	0	0	0	0	0	0	0	0	0	0	0	0	0	0	0	0	0	0	0
NC_007530	950182	AATGAAAGAT.CTTGCCATCT	C	T	40	PASS	NA	GT	0	0	0	0	0	0	0	0	0	0	0	0	0	0	0	0	0	0	0	0	0	0	0	0	0	0	0	0	0	0	0	0	0	0	0	0	0	0	0	0	0
NC_007530	950184	TGAAAGATCT.TGCCATCTTT	T	C	40	PASS	NA	GT	0	0	0	0	0	0	0	0	0	0	0	0	0	0	0	0	0	0	0	0	0	0	0	0	0	0	0	0	0	0	0	0	0	0	0	0	0	0	0	0	0
NC_007530	950185	GAAAGATCTT.GCCATCTTTT	G	C	40	PASS	NA	GT	0	0	0	0	0	0	0	0	0	0	0	0	0	0	0	0	0	0	0	0	0	0	0	0	0	0	0	0	0	0	0	0	0	0	0	0	0	0	0	0	0
NC_007530	951049	TCTTTATCTT.CAAAGTGTTT	C	A	40	PASS	NA	GT	0	0	1	0	0	0	0	0	0	0	0	0	0	0	0	0	0	0	0	0	0	0	0	0	0	0	0	0	0	0	0	0	0	0	0	0	0	0	0	0	0
NC_007530	951380	TGACAACTAA.GAGCCCTGCA	G	A	40	PASS	NA	GT	0	0	0	0	0	0	0	0	1	0	0	0	0	0	0	0	0	0	0	0	0	0	0	0	0	0	0	0	0	0	0	0	0	0	0	0	0	0	0	0	0
NC_007530	951542	CAACGATTCA.ATGGCTTTCT	A	T	40	PASS	NA	GT	0	0	0	0	0	0	0	0	0	0	0	0	0	0	0	0	0	0	0	0	0	0	0	0	0	0	1	0	0	0	0	0	0	0	0	0	0	0	0	0	0
NC_007530	952063	GGTGATTTAG.GGTGGTCTGA	G	A	40	PASS	NA	GT	0	0	0	0	0	0	0	0	0	0	0	0	0	0	0	0	0	0	0	0	0	0	0	0	0	0	0	0	0	0	0	0	0	0	0	0	0	0	0	0	0
NC_007530	952213	GGATTAATAG.TCATTGTGAT	T	A	40	PASS	NA	GT	0	0	0	0	0	0	0	0	0	1	0	0	0	0	0	0	0	0	0	0	0	0	0	0	0	0	0	0	0	0	0	0	0	0	0	0	0	0	0	0	0
NC_007530	952439	TATTTAAAGG.CATTACTCCT	C	T	40	PASS	NA	GT	0	0	0	0	0	0	0	0	0	0	0	0	0	0	0	0	0	0	0	0	0	0	0	0	0	0	0	0	0	0	0	0	0	0	0	0	0	0	0	0	0
NC_007530	952567	TATCCGCACG.GAACAGCGTT	G	A	40	PASS	NA	GT	0	0	0	0	0	0	0	0	1	0	0	0	0	0	0	0	0	0	0	0	0	0	0	0	0	0	0	0	0	0	0	0	0	0	0	0	0	0	0	0	0
NC_007530	954123	CTCGCACTTT.TGCAGTAATT	T	C	40	PASS	NA	GT	0	0	0	0	0	0	0	0	0	0	0	0	0	0	1	1	0	0	0	0	0	0	0	0	0	0	0	0	0	0	0	0	0	0	0	0	0	0	0	0	0
NC_007530	954423	CCGAATCCGC.CGCCCCAACA	C	T	40	PASS	NA	GT	0	0	0	0	0	0	0	0	0	0	0	0	0	0	0	1	0	0	0	0	0	0	0	0	0	0	0	0	0	0	0	0	0	0	0	0	0	0	0	0	0
NC_007530	955000	ATTCATAAAA.CTATAAGAAA	C	T	40	PASS	NA	GT	0	0	0	0	0	0	0	0	0	0	0	0	0	0	0	0	0	0	0	0	0	0	0	0	0	0	0	0	0	0	0	0	0	0	0	0	0	0	0	0	0
NC_007530	955014	AAGAAAAGAA.GACATCAATT	G	T	40	PASS	NA	GT	0	0	0	0	0	0	0	0	0	0	0	0	0	0	0	0	0	0	0	0	0	0	0	0	0	0	0	0	0	0	0	0	0	0	0	0	0	0	0	0	0
NC_007530	955016	GAAAAGAAGA.CATCAATTAA	C	T	40	PASS	NA	GT	0	0	0	0	0	0	0	0	0	0	0	0	0	0	0	0	0	0	0	0	0	0	0	0	0	0	0	0	0	0	0	0	0	0	0	0	0	0	0	0	0
NC_007530	955025	ACATCAATTA.AGATGTCTTC	A	T	40	PASS	NA	GT	0	0	0	0	0	0	0	0	0	0	0	0	0	0	0	0	0	0	0	0	0	0	0	0	0	0	0	0	0	0	0	0	0	0	0	0	0	0	0	0	0
NC_007530	955026	CATCAATTAA.GATGTCTTCT	G	A	40	PASS	NA	GT	0	0	0	0	0	0	0	0	0	0	0	0	0	0	0	0	0	0	0	0	0	0	0	0	0	0	0	0	0	0	0	0	0	0	0	0	0	0	0	0	0
NC_007530	955030	AATTAAGATG.TCTTCTTTTA	T	A	40	PASS	NA	GT	0	0	0	0	0	0	0	0	0	0	0	0	0	0	0	0	0	0	0	0	0	0	0	0	0	0	0	0	0	0	0	0	0	0	0	0	0	0	0	0	0
NC_007530	955278	CTTTTTTTAT.AATTGTTTTA	A	C	40	PASS	NA	GT	0	0	0	0	0	0	0	0	1	0	0	0	0	0	0	0	0	0	0	0	0	0	0	0	0	0	0	0	0	0	0	0	0	0	0	0	0	0	0	0	0
NC_007530	956439	AGTGTTATGA.TCGGAAAAAG	T	A	40	PASS	NA	GT	0	0	0	0	0	0	0	0	1	0	0	0	0	0	0	0	0	0	0	0	0	0	0	0	0	0	0	0	0	0	0	0	0	0	0	0	0	0	0	0	0
NC_007530	956711	GAGAGTGATG.CTAGATAAAA	C	T	40	PASS	NA	GT	0	0	0	0	0	0	0	0	0	0	0	0	0	0	0	0	0	0	0	0	0	0	0	0	0	0	0	0	0	0	0	0	0	0	0	0	0	0	0	0	0
NC_007530	956827	ATATAACTAT.CATTGGTGAT	C	T	40	PASS	NA	GT	0	0	0	0	1	1	0	0	0	0	0	0	0	0	0	0	0	0	0	0	0	0	0	0	0	0	0	0	0	0	0	0	0	0	0	0	0	0	0	0	0
NC_007530	958262	TATTATGATG.CTAACAAGAA	C	T	40	PASS	NA	GT	0	0	0	0	0	1	0	0	0	0	0	0	0	0	0	0	0	0	0	0	0	0	0	0	0	0	0	0	0	0	0	0	0	0	0	0	0	0	0	0	0
NC_007530	960087	CTGCTCTGTA.CTCCCTGTTT	C	T	40	PASS	NA	GT	0	0	0	0	0	0	0	0	0	0	0	0	0	0	0	0	0	0	0	0	0	0	0	0	0	0	0	0	0	0	1	0	0	0	0	0	0	0	0	0	0
NC_007530	960176	GGATATAAAG.ATCTGCTAAA	A	T	40	PASS	NA	GT	0	0	0	0	0	0	0	0	0	1	0	0	0	0	0	0	0	0	0	0	0	0	0	0	0	0	0	0	0	0	0	0	0	0	0	0	0	0	0	0	0
NC_007530	960489	ACCTAAATCT.ATTTTCGTCA	A	G	40	PASS	NA	GT	0	0	0	0	0	0	0	0	1	0	0	0	0	0	0	0	0	0	0	0	0	0	0	0	0	0	0	0	0	0	0	0	0	0	0	0	0	0	0	0	0
NC_007530	962041	TAAATCCTTA.GAATATAAAT	G	T	40	PASS	NA	GT	0	0	0	0	0	0	0	0	1	0	0	0	0	0	0	0	0	0	0	0	0	0	0	0	0	0	0	0	0	0	0	0	0	0	0	0	0	0	0	0	0
NC_007530	962086	TTTTTATTTG.AGTTATGCGC	A	T	40	PASS	NA	GT	0	0	0	0	0	0	0	0	0	1	0	0	0	0	0	0	0	0	0	0	0	0	0	0	0	0	0	0	0	0	0	0	0	0	0	0	0	0	0	0	0
NC_007530	962521	GGAAGAGTTA.GAAGAAATGT	G	T	40	PASS	NA	GT	0	0	0	0	0	0	0	0	1	0	0	0	0	0	0	0	0	0	0	0	0	0	0	0	0	0	0	0	0	0	0	0	0	0	0	0	0	0	0	0	0
NC_007530	964659	TTTTTTACAA.GAATGAACAG	G	T	40	PASS	NA	GT	0	0	0	0	0	0	0	0	0	0	0	0	0	0	0	0	0	0	0	0	0	0	0	0	0	0	0	0	0	0	0	0	0	0	0	0	0	0	0	0	0
NC_007530	965191	TTTGCGGCAG.TTACATTAAG	T	A	40	PASS	NA	GT	0	0	0	0	0	0	0	0	0	1	0	0	0	0	0	0	0	0	0	0	0	0	0	0	0	0	0	0	0	0	0	0	0	0	0	0	0	0	0	0	0
NC_007530	966280	AAATACGAGG.CTATTTTTTG	C	A	40	PASS	NA	GT	0	0	0	0	0	0	0	0	1	0	0	0	0	0	0	0	0	0	0	0	0	0	0	0	0	0	0	0	0	0	0	0	0	0	0	0	0	0	0	0	0
NC_007530	967496	CTTTGCTGAT.TGCTCCAGTA	T	C	40	PASS	NA	GT	0	0	0	0	0	0	0	0	1	0	0	0	0	0	0	0	0	0	0	0	0	0	0	0	0	0	0	0	0	0	0	0	0	0	0	0	0	0	0	0	0
NC_007530	970740	AATTGTCGAC.CAAGTTAATC	C	T	40	PASS	NA	GT	0	0	0	0	0	0	0	0	0	0	0	0	0	0	0	0	0	0	0	0	0	0	0	0	0	0	0	0	0	0	0	0	0	1	0	0	0	0	0	0	0
NC_007530	970745	TCGACCAAGT.TAATCGTCGA	T	C	40	PASS	NA	GT	0	0	0	0	0	0	0	0	0	0	0	0	0	0	0	0	0	0	0	0	0	0	0	0	0	0	0	0	1	0	0	0	0	0	0	0	0	0	0	0	0
NC_007530	970754	TTAATCGTCG.ATTAACTTGG	A	G	40	PASS	NA	GT	0	0	0	0	0	0	0	0	0	0	0	0	0	0	0	0	0	0	0	0	0	0	0	0	0	0	0	0	0	0	0	0	0	0	0	0	0	0	0	0	0
NC_007530	970810	GAAATACATA.CTATTCTAAA	C	T	40	PASS	NA	GT	0	0	0	0	0	0	0	0	0	0	0	0	0	0	0	0	0	0	0	0	0	0	0	0	0	0	0	0	0	0	0	0	0	0	0	0	0	0	0	0	0
NC_007530	971790	ATTAGTTGAA.ATCTCTCGTA	A	C	40	PASS	NA	GT	0	0	0	0	0	0	0	0	1	0	0	0	0	0	0	0	0	0	0	0	0	0	0	0	0	0	0	0	0	0	0	0	0	0	0	0	0	0	0	0	0
NC_007530	973796	AGAAATTAAT.CAATCTCTTA	C	G	40	PASS	NA	GT	0	0	0	0	0	0	0	0	0	1	0	0	0	0	0	0	0	0	0	0	0	0	0	0	0	0	0	0	0	0	0	0	0	0	0	0	0	0	0	0	0
NC_007530	974715	GATTATTTTT.TTAAATGCTG	T	G	40	PASS	NA	GT	0	0	0	0	0	0	0	0	0	1	0	0	0	0	0	0	0	0	0	0	0	0	0	0	0	0	0	0	0	0	0	0	0	0	0	0	0	0	0	0	0
NC_007530	978367	TTTGATCCGC.CCCTAATATG	C	T	40	PASS	NA	GT	0	0	0	0	0	0	0	0	0	0	0	0	0	0	0	0	0	0	0	0	0	0	1	0	0	0	0	0	0	0	1	0	0	0	0	0	0	0	0	0	0
NC_007530	978380	TAATATGTTT.ATTTGTTATA	A	G	40	PASS	NA	GT	0	0	0	0	0	0	0	0	0	0	0	0	0	0	0	0	0	0	0	0	0	0	1	0	0	0	0	0	0	0	0	0	0	0	0	0	0	0	0	0	0
NC_007530	978585	ATAAAGAAGA.ATTATTTTAA	A	G	40	PASS	NA	GT	0	0	0	0	0	0	0	0	0	0	0	0	0	0	0	0	0	0	0	0	0	0	0	0	0	0	0	0	0	0	0	0	0	0	0	0	0	0	0	1	1
NC_007530	978649	TAACTGCTCA.TCTCCAAGGG	T	C	40	PASS	NA	GT	0	0	0	0	0	0	0	0	0	0	0	0	0	0	0	0	0	0	0	0	0	0	0	0	0	0	0	0	0	0	0	0	0	0	0	0	0	0	0	0	0
NC_007530	979364	AAGATTTATC.GAGTAAAAAT	G	C	40	PASS	NA	GT	0	0	0	0	0	0	0	0	0	0	0	0	0	0	0	0	0	0	0	0	0	0	0	0	0	0	1	0	0	0	0	0	0	0	0	0	0	0	0	0	0
NC_007530	979440	GCAAGTTGCA.GCTTTAATTT	G	C	40	PASS	NA	GT	0	0	0	0	0	0	0	0	1	0	0	0	0	0	0	0	0	0	0	0	0	0	0	0	0	0	0	0	0	0	0	0	0	0	0	0	0	0	0	0	0
NC_007530	979696	AATGCTTTTC.AAGTTTCAGC	A	G	40	PASS	NA	GT	0	0	0	0	0	0	0	0	0	0	0	0	0	0	0	0	0	0	0	0	0	0	0	0	0	0	0	0	0	0	0	0	0	0	0	0	0	0	0	0	0
NC_007530	981177	ATTATGCAAA.AGGTGGAGGA	A	G	40	PASS	NA	GT	0	0	0	0	0	0	0	0	1	0	0	0	0	0	0	0	0	0	0	0	0	0	0	0	0	0	0	0	0	0	0	0	0	0	0	0	0	0	0	0	0
NC_007530	982065	CGGCTTAGCA.TGTGTTTTTC	T	G	40	PASS	NA	GT	0	0	0	0	0	0	0	0	0	0	0	0	0	0	0	0	0	0	0	0	0	0	1	0	0	0	0	0	0	0	1	0	0	0	0	0	0	0	0	0	0
NC_007530	982471	GAAATAGGCG.AGCTTTTTTA	A	G	40	LCB	NA	GT	0	0	0	0	0	0	0	0	0	0	0	0	0	0	0	0	0	0	0	0	0	0	0	0	0	0	0	0	0	0	0	0	0	0	0	0	0	0	0	0	0
NC_007530	982473	AATAGGCGAG.CTTTTTTAAC	C	T	40	LCB	NA	GT	0	0	0	0	0	0	0	0	0	0	0	0	0	0	0	0	0	0	0	0	0	0	0	0	0	0	0	0	0	0	0	0	0	0	0	0	0	0	0	0	0
NC_007530	982905	TAATCTTACA.GTTTGAAATC	G	A	40	PASS	NA	GT	0	0	0	0	0	0	0	0	1	0	0	0	0	0	0	0	0	0	0	0	0	0	0	0	0	0	0	0	0	0	0	0	0	0	0	0	0	0	0	0	0
NC_007530	982906	AATCTTACAG.TTTGAAATCT	T	G	40	PASS	NA	GT	0	0	0	0	0	0	0	0	1	0	0	0	0	0	0	0	0	0	0	0	0	0	0	0	0	0	0	0	0	0	0	0	0	0	0	0	0	0	0	0	0
NC_007530	983238	AACGGTTATA.GTAGAATGTG	G	A	40	PASS	NA	GT	0	0	0	0	0	0	0	0	0	1	0	0	0	0	0	0	0	0	0	0	0	0	0	0	0	0	0	0	0	0	0	0	0	0	0	0	0	0	0	0	0
NC_007530	985665	TGAAAAGATA.GAAATGAAAA	G	A	40	PASS	NA	GT	0	0	0	0	0	0	0	0	1	0	0	0	0	0	0	0	0	0	0	0	0	0	0	0	0	0	0	0	0	0	0	0	0	0	0	0	0	0	0	0	0
NC_007530	989536	CTAAGTTCGT.GCGCTTATCC	G	C	40	PASS	NA	GT	0	0	0	0	0	0	0	0	1	0	0	0	0	0	0	0	0	0	0	0	0	0	0	0	0	0	0	0	0	0	0	0	0	0	0	0	0	0	0	0	0
NC_007530	990242	CGCCATCAGC.CTGTTGAAAG	C	A	40	PASS	NA	GT	0	0	1	0	0	0	0	0	0	0	0	0	0	0	0	0	0	0	0	0	0	0	0	0	0	0	0	0	0	0	0	0	0	0	0	0	0	0	0	0	0
NC_007530	992966	AAGGAGACTG.TTACATATGG	T	C	40	PASS	NA	GT	0	0	0	0	0	0	0	0	0	0	0	0	0	0	0	0	0	0	0	0	0	0	0	0	0	0	0	0	0	0	0	0	0	0	0	0	0	0	0	0	0
NC_007530	995060	TGGATTATGA.GAAGTTGTTT	G	T	40	PASS	NA	GT	0	0	0	0	0	0	0	0	1	0	0	0	0	0	0	0	0	0	0	0	0	0	0	0	0	0	0	0	0	0	0	0	0	0	0	0	0	0	0	0	0
NC_007530	995061	GGATTATGAG.AAGTTGTTTC	A	C	40	PASS	NA	GT	0	0	0	0	0	0	0	0	1	0	0	0	0	0	0	0	0	0	0	0	0	0	0	0	0	0	0	0	0	0	0	0	0	0	0	0	0	0	0	0	0
NC_007530	995062	GATTATGAGA.AGTTGTTTCC	A	T	40	PASS	NA	GT	0	0	0	0	0	0	0	0	1	0	0	0	0	0	0	0	0	0	0	0	0	0	0	0	0	0	0	0	0	0	0	0	0	0	0	0	0	0	0	0	0
NC_007530	995063	ATTATGAGAA.GTTGTTTCCT	G	C	40	PASS	NA	GT	0	0	0	0	0	0	0	0	1	0	0	0	0	0	0	0	0	0	0	0	0	0	0	0	0	0	0	0	0	0	0	0	0	0	0	0	0	0	0	0	0
NC_007530	995418	AATTTTCGTT.CCTAAATGCA	C	T	40	PASS	NA	GT	0	0	0	0	0	0	0	0	0	0	0	0	0	0	0	0	0	0	0	0	0	0	0	0	0	0	0	0	0	0	0	0	0	0	0	0	0	0	0	0	0
NC_007530	995541	ATCAACTGCC.GCTTTCACAT	G	A	40	PASS	NA	GT	0	0	0	0	0	0	0	0	0	0	0	0	0	0	0	0	0	1	0	0	0	0	0	0	0	0	0	0	0	0	0	0	0	0	0	0	0	0	0	0	0
NC_007530	997284	CGCTTCTTTT.TTTAGCGCTG	T	A	40	PASS	NA	GT	0	0	0	0	0	0	0	0	0	0	0	0	0	0	0	0	0	0	0	0	0	0	0	0	0	0	0	0	0	0	0	0	0	0	0	0	0	0	0	0	0
NC_007530	999757	ACGACTATCT.CGTATAACTG	C	T	40	PASS	NA	GT	0	0	0	0	0	0	0	0	1	0	0	0	0	0	0	0	0	0	0	0	0	0	0	0	0	0	0	0	0	0	0	0	0	0	0	0	0	0	0	0	0
NC_007530	999928	AATCTATCAA.ACCTCATTGA	A	T	40	PASS	NA	GT	0	0	0	0	0	0	0	0	1	0	0	0	0	0	0	0	0	0	0	0	0	0	0	0	0	0	0	0	0	0	0	0	0	0	0	0	0	0	0	0	0
NC_007530	1002895	AGATAGTTTA.TGGCATATCG	T	A	40	PASS	NA	GT	0	0	0	0	0	0	0	0	1	0	0	0	0	0	0	0	0	0	0	0	0	0	0	0	0	0	0	0	0	0	0	0	0	0	0	0	0	0	0	0	0
NC_007530	1005185	TCCAAAAGGT.TGTATTATAA	T	C	40	PASS	NA	GT	0	0	0	0	0	0	0	0	0	1	0	0	0	0	0	0	0	0	0	0	0	0	0	0	0	0	0	0	0	0	0	0	0	0	0	0	0	0	0	0	0
NC_007530	1005924	GTAATGAGTG.GTTTATTAAT	G	A	40	PASS	NA	GT	0	0	0	0	0	0	0	0	0	1	0	0	0	0	0	0	0	0	0	0	0	0	0	0	0	0	0	0	0	0	0	0	0	0	0	0	0	0	0	0	0
NC_007530	1009913	AGGAATGGGA.ATTAGCTGAA	A	G	40	PASS	NA	GT	0	0	0	0	0	0	0	0	0	0	0	0	0	0	0	0	0	0	0	0	0	0	0	0	0	0	0	0	0	0	0	0	0	0	0	0	0	0	0	0	0
NC_007530	1009914	GGAATGGGAA.TTAGCTGAAG	T	G	40	PASS	NA	GT	0	0	0	0	0	0	0	0	0	0	0	0	0	0	0	0	0	0	0	0	0	0	0	0	0	0	0	0	0	0	0	0	0	0	0	0	0	0	0	0	0
NC_007530	1009915	GAATGGGAAT.TAGCTGAAGA	T	A	40	PASS	NA	GT	0	0	0	0	0	0	0	0	0	0	0	0	0	0	0	0	0	0	0	0	0	0	0	0	0	0	0	0	0	0	0	0	0	0	0	0	0	0	0	0	0
NC_007530	1009933	GAACATTTCA.CAGCTGCTAT	C	T	40	PASS	NA	GT	0	0	0	0	0	0	0	0	0	0	0	0	0	0	0	0	0	0	0	0	0	0	0	0	0	0	0	0	0	0	0	0	0	0	0	0	0	0	0	0	0
NC_007530	1009943	CAGCTGCTAT.GGATCAATTC	G	T	40	PASS	NA	GT	0	0	0	0	0	0	0	0	0	0	0	0	0	0	0	0	0	0	0	0	0	0	0	0	0	0	0	0	0	0	0	0	0	0	0	0	0	0	0	0	0
NC_007530	1010423	AACTTTTTGA.TAAGGGGGCT	T	A	40	PASS	NA	GT	0	0	0	0	0	0	0	0	0	0	0	0	0	0	0	0	0	0	0	0	0	0	0	0	0	0	0	0	0	0	0	0	0	0	0	0	0	0	0	0	0
NC_007530	1010476	GGATTGTAAC.AGTATTTACA	A	C	40	PASS	NA	GT	0	0	0	0	0	0	0	0	1	0	0	0	0	0	0	0	0	0	0	0	0	0	0	0	0	0	0	0	0	0	0	0	0	0	0	0	0	0	0	0	0
NC_007530	1010597	CACAATGAGG.TCTCTTTTTT	T	G	40	PASS	NA	GT	0	0	0	0	0	0	0	0	0	0	0	0	0	0	0	0	0	0	0	0	0	0	0	0	0	0	0	0	0	0	0	0	0	0	0	0	0	0	0	0	0
NC_007530	1010660	ATAATAGTTA.CAAAATAACC	C	T	40	PASS	NA	GT	0	0	0	0	0	0	0	0	0	0	0	0	0	0	0	0	0	0	0	0	0	0	0	0	0	0	0	0	0	0	0	0	0	0	0	0	0	0	0	0	0
NC_007530	1010715	AATTGTAACC.GTTGTGGTTA	G	T	40	PASS	NA	GT	0	0	0	0	0	0	0	0	0	0	0	0	0	0	0	0	0	1	0	0	0	0	0	0	0	0	0	0	0	0	0	0	0	0	0	0	0	0	0	0	0
NC_007530	1010773	AACTTTAAAT.AACAATTTGA	A	G	40	PASS	NA	GT	0	0	0	0	0	0	0	0	0	0	0	0	0	0	0	0	0	0	0	0	0	0	0	0	0	0	0	0	0	0	0	0	0	0	0	0	0	0	0	0	0
NC_007530	1013110	TAAGAAAGGA.TAGCGTATTT	T	A	40	PASS	NA	GT	0	0	0	0	0	0	0	0	0	0	0	0	0	0	0	0	0	0	0	0	0	0	0	0	0	0	0	0	0	0	0	0	0	0	0	0	0	0	0	0	0
NC_007530	1014066	GATTTAATTC.ATGGCTTGCA	A	G	40	PASS	NA	GT	0	1	0	0	0	0	0	1	0	0	1	1	1	1	0	0	0	0	0	0	0	0	0	0	0	0	0	0	0	0	0	0	0	0	0	0	0	1	0	0	0
NC_007530	1014286	CGGGAGCGTT.AACGGATGTG	A	T	40	PASS	NA	GT	0	0	0	0	0	0	0	0	0	0	0	0	0	0	0	0	0	0	0	0	0	0	0	0	0	0	0	0	0	0	0	0	0	0	0	0	0	0	0	0	0
NC_007530	1014487	TTTCATTAAC.GGTTAACATT	G	A	40	PASS	NA	GT	0	1	1	1	1	1	1	1	1	1	1	1	1	1	1	1	1	1	1	1	1	1	1	1	1	1	1	1	1	1	1	1	1	1	1	1	1	1	1	1	1
NC_007530	1016668	GCTTACCAAA.TAAAAGACGT	T	C	40	PASS	NA	GT	0	1	1	1	1	1	1	1	1	1	1	1	1	1	1	1	1	1	1	1	1	1	1	1	1	1	1	1	1	1	1	1	1	1	1	1	1	1	1	1	1
NC_007530	1027344	AAAGGGTGCG.GACGTTTAGA	G	A	40	PASS	NA	GT	0	0	0	0	1	0	0	0	0	0	0	0	0	0	0	0	0	0	0	0	0	0	0	0	0	0	0	0	0	0	0	0	0	0	0	0	0	0	0	0	0
NC_007530	1028400	CCCATGATGC.ATCTGTGAAA	A	C	40	PASS	NA	GT	0	0	0	0	0	0	0	0	1	0	0	0	0	0	0	0	0	0	0	0	0	0	0	0	0	0	0	0	0	0	0	0	0	0	0	0	0	0	0	0	0
NC_007530	1028861	TGAGTAGATG.CTTTAAAACG	C	T	40	PASS	NA	GT	0	0	0	0	0	0	0	0	0	0	0	0	0	0	0	0	0	0	0	0	0	0	0	0	0	0	0	0	0	0	0	0	0	1	0	0	0	0	0	0	0
NC_007530	1028939	AATTGTTCAT.AAGGGTCTTC	A	T	40	PASS	NA	GT	0	0	0	0	0	0	0	0	0	1	0	0	0	0	0	0	0	0	0	0	0	0	0	0	0	0	0	0	0	0	0	0	0	0	0	0	0	0	0	0	0
NC_007530	1029033	GTTCAGGTAG.TACGTTAGAA	T	C	40	PASS	NA	GT	0	0	0	0	0	0	0	0	1	0	0	0	0	0	0	0	0	0	0	0	0	0	0	0	0	0	0	0	0	0	0	0	0	0	0	0	0	0	0	0	0
NC_007530	1029034	TTCAGGTAGT.ACGTTAGAAA	A	G	40	PASS	NA	GT	0	0	0	0	0	0	0	0	1	0	0	0	0	0	0	0	0	0	0	0	0	0	0	0	0	0	0	0	0	0	0	0	0	0	0	0	0	0	0	0	0
NC_007530	1029608	GCGGCAAGTC.GATTAAAGGT	G	T	40	PASS	NA	GT	0	0	1	0	0	0	0	0	0	0	0	0	0	0	0	0	0	0	0	0	0	0	0	0	0	0	0	0	0	0	0	0	0	0	0	0	0	0	0	0	0
NC_007530	1029921	TTTGGTGTAC.AATTAAGATA	A	T	40	PASS	NA	GT	0	0	0	0	0	0	0	0	0	0	0	0	0	0	0	0	0	0	0	0	0	0	0	0	0	0	0	0	0	0	0	0	0	0	0	0	0	0	0	0	0
NC_007530	1030062	TTGTGTTTGT.AGAGGGAGTC	A	G	40	PASS	NA	GT	0	0	0	0	0	0	0	0	0	0	0	0	0	1	0	0	0	0	0	0	0	0	0	0	0	0	0	0	0	0	0	0	0	0	0	0	0	0	0	0	0
NC_007530	1032067	AATTTGAAAA.AGCGCTTCCA	A	T	40	PASS	NA	GT	0	0	0	0	0	0	0	0	1	0	0	0	0	0	0	0	0	0	0	0	0	0	0	0	0	0	0	0	0	0	0	0	0	0	0	0	0	0	0	0	0
NC_007530	1032837	AAATTTTTCG.GAAAAATGAC	G	A	40	PASS	NA	GT	0	0	0	0	0	0	0	0	0	0	0	0	0	0	0	0	0	0	0	0	0	0	0	0	0	0	0	0	0	0	0	0	0	0	0	0	0	0	0	0	1
NC_007530	1034481	TAAATTTTAA.TTTTTTTTGA	T	A	40	PASS	NA	GT	0	0	0	0	0	0	0	0	0	1	0	0	0	0	0	0	0	0	0	0	0	0	0	0	0	0	0	0	0	0	0	0	0	0	0	0	0	0	0	0	0
NC_007530	1034661	GAATAAAGGT.GAACTTGTCG	G	T	40	PASS	NA	GT	0	0	1	0	0	0	0	0	0	0	0	0	0	0	0	0	0	0	0	0	0	0	0	0	0	0	0	0	0	0	0	0	0	0	0	0	0	0	0	0	0
NC_007530	1035519	TCGTATTAAC.AGCCGGATCT	A	G	40	PASS	NA	GT	0	0	0	0	0	0	0	0	1	0	0	0	0	0	0	0	0	0	0	0	0	0	0	0	0	0	0	0	0	0	0	0	0	0	0	0	0	0	0	0	0
NC_007530	1035525	TAACAGCCGG.ATCTATTCAA	A	T	40	PASS	NA	GT	0	0	0	0	0	0	0	0	1	0	0	0	0	0	0	0	0	0	0	0	0	0	0	0	0	0	0	0	0	0	0	0	0	0	0	0	0	0	0	0	0
NC_007530	1036421	GCGACGAAAG.ATTTCATGAT	A	G	40	PASS	NA	GT	0	0	0	0	0	0	0	0	0	1	0	0	0	0	0	0	0	0	0	0	0	0	0	0	0	0	0	0	0	0	0	0	0	0	0	0	0	0	0	0	0
NC_007530	1037495	AATTCCTTAT.GGAGCACTAA	G	A	40	PASS	NA	GT	0	0	0	0	0	0	0	0	0	0	0	0	0	0	0	0	0	0	0	0	0	0	1	0	0	0	0	0	0	0	1	0	0	0	0	0	0	0	0	0	0
NC_007530	1038448	CTGACATGGT.CAAGGTGTGG	C	T	40	PASS	NA	GT	0	0	0	0	0	0	0	0	1	0	0	0	0	0	0	0	0	0	0	0	0	0	0	0	0	0	0	0	0	0	0	0	0	0	0	0	0	0	0	0	0
NC_007530	1038505	TCGTCATGTT.AGCGTACCTT	A	C	40	PASS	NA	GT	0	0	0	0	0	0	0	0	1	0	0	0	0	0	0	0	0	0	0	0	0	0	0	0	0	0	0	0	0	0	0	0	0	0	0	0	0	0	0	0	0
NC_007530	1038506	CGTCATGTTA.GCGTACCTTT	G	T	40	PASS	NA	GT	0	0	0	0	0	0	0	0	1	0	0	0	0	0	0	0	0	0	0	0	0	0	0	0	0	0	0	0	0	0	0	0	0	0	0	0	0	0	0	0	0
NC_007530	1038874	AAGTGAGTGA.TGAGGATGTA	T	C	40	PASS	NA	GT	0	0	0	0	0	0	0	0	0	1	0	0	0	0	0	0	0	0	0	0	0	0	0	0	0	0	0	0	0	0	0	0	0	0	0	0	0	0	0	0	0
NC_007530	1038891	GTATAAGAGA.CAGCATCCGA	C	A	40	PASS	NA	GT	0	0	0	0	0	0	0	0	1	0	0	0	0	0	0	0	0	0	0	0	0	0	0	0	0	0	0	0	0	0	0	0	0	0	0	0	0	0	0	0	0
NC_007530	1040168	AGAAGAAGAC.ACGTCCAATC	A	T	40	PASS	NA	GT	0	0	0	0	0	0	0	0	1	0	0	0	0	0	0	0	0	0	0	0	0	0	0	0	0	0	0	0	0	0	0	0	0	0	0	0	0	0	0	0	0
NC_007530	1042548	CAAATAAGTT.ACAGGATGTG	A	G	40	PASS	NA	GT	0	0	0	0	0	0	0	0	0	0	0	0	0	0	0	0	0	0	0	0	0	0	0	0	0	0	0	0	0	0	0	0	0	0	0	0	0	0	0	0	0
NC_007530	1044391	TTCTTCATAA.AAAATATCGT	A	T	40	PASS	NA	GT	0	0	0	0	0	0	0	0	0	1	0	0	0	0	0	0	0	0	0	0	0	0	0	0	0	0	0	0	0	0	0	0	0	0	0	0	0	0	0	0	0
NC_007530	1044796	AGCTTTAAGA.TATTACCATC	T	G	40	PASS	NA	GT	0	0	0	0	0	0	0	0	1	0	0	0	0	0	0	0	0	0	0	0	0	0	0	0	0	0	0	0	0	0	0	0	0	0	0	0	0	0	0	0	0
NC_007530	1044856	GGGTTATAGA.TACTATTCGG	T	A	40	PASS	NA	GT	0	0	0	0	0	0	0	0	0	0	0	0	0	0	0	0	0	0	0	0	0	0	0	0	1	1	0	1	0	0	0	0	0	0	0	0	0	0	0	0	0
NC_007530	1046088	TCAAGTGTAT.TCGATTAATG	T	C	40	PASS	NA	GT	0	0	0	0	0	0	0	0	0	1	0	0	0	0	0	0	0	0	0	0	0	0	0	0	0	0	0	0	0	0	0	0	0	0	0	0	0	0	0	0	0
NC_007530	1047683	TTTACCGAGG.GATGCATTAC	G	A	40	PASS	NA	GT	0	0	0	0	0	0	0	0	1	0	0	0	0	0	0	0	0	0	0	0	0	0	0	0	0	0	0	0	0	0	0	0	0	0	0	0	0	0	0	0	0
NC_007530	1049224	GCGGCAGTAC.GATTACGCAG	G	T	40	PASS	NA	GT	0	0	0	0	0	0	0	0	1	0	0	0	0	0	0	0	0	0	0	0	0	0	0	0	0	0	0	0	0	0	0	0	0	0	0	0	0	0	0	0	0
NC_007530	1049233	CGATTACGCA.GCAACTTGCT	G	T	40	PASS	NA	GT	0	0	1	0	0	0	0	0	0	0	0	0	0	0	0	0	0	0	0	0	0	0	0	0	0	0	0	0	0	0	0	0	0	0	0	0	0	0	0	0	0
NC_007530	1050290	TGGTGATATT.GTTGAGCCGC	G	A	40	PASS	NA	GT	0	1	1	1	1	1	1	1	1	1	1	1	1	1	1	1	1	1	1	1	1	1	1	1	1	1	1	1	1	1	1	1	1	1	1	1	1	1	1	1	1
NC_007530	1050346	TCATTGGAGA.ATCTCCAAAA	A	G	40	PASS	NA	GT	0	0	0	0	0	0	0	0	1	0	0	0	0	0	0	0	0	0	0	0	0	0	0	0	0	0	0	0	0	0	0	0	0	0	0	0	0	0	0	0	0
NC_007530	1053270	ATATTCGTGA.CAAGAACTTG	C	T	40	PASS	NA	GT	0	0	0	0	0	0	0	0	0	0	0	0	0	0	0	0	0	0	0	0	0	0	0	0	0	0	0	0	0	0	0	0	0	0	0	0	0	0	0	0	0
NC_007530	1054372	TACAGAGGAT.CCAGAGTTTA	C	G	40	PASS	NA	GT	0	0	0	0	0	0	0	0	0	0	0	0	0	0	0	0	0	0	0	0	0	0	0	0	0	0	0	0	0	0	0	0	0	0	0	0	0	0	0	0	0
NC_007530	1054390	TACAGTCGTA.AGTCGCTGGA	A	C	40	PASS	NA	GT	0	0	0	0	0	0	0	0	0	0	0	0	0	0	0	0	0	0	0	0	0	0	0	0	0	0	0	0	0	0	0	0	0	0	0	0	0	0	0	0	0
NC_007530	1054402	TCGCTGGAAA.GAAGCAATGC	G	T	40	PASS	NA	GT	0	0	0	0	0	0	0	0	0	0	0	0	0	0	0	0	0	0	0	0	0	0	0	0	0	0	0	0	0	0	0	0	0	0	0	0	0	0	0	0	0
NC_007530	1054404	GCTGGAAAGA.AGCAATGCCC	A	T	40	PASS	NA	GT	0	0	0	0	0	0	0	0	0	0	0	0	0	0	0	0	0	0	0	0	0	0	0	0	0	0	0	0	0	0	0	0	0	0	0	0	0	0	0	0	0
NC_007530	1054620	AAAGAGAAAC.GCCTTCAATC	G	C	40	PASS	NA	GT	0	0	0	0	0	0	0	0	0	0	0	0	0	0	0	0	0	0	0	0	0	0	0	0	0	0	0	0	0	0	0	0	0	0	0	0	0	0	0	0	0
NC_007530	1056400	GACAGTGGAA.GGATATATCG	G	T	40	PASS	NA	GT	0	0	1	0	0	0	0	0	0	0	0	0	0	0	0	0	0	0	0	0	0	0	0	0	0	0	0	0	0	0	0	0	0	0	0	0	0	0	0	0	0
NC_007530	1056917	ACTTTTTCAT.TTGTTATCGT	T	A	40	PASS	NA	GT	0	0	0	0	0	0	0	0	1	0	0	0	0	0	0	0	0	0	0	0	0	0	0	0	0	0	0	0	0	0	0	0	0	0	0	0	0	0	0	0	0
NC_007530	1058064	TACCGAAGTT.GCTTGATAAA	G	T	40	PASS	NA	GT	0	0	1	0	0	0	0	0	0	0	0	0	0	0	0	0	0	0	0	0	0	0	0	0	0	0	0	0	0	0	0	0	0	0	0	0	0	0	0	0	0
NC_007530	1058660	GATAAAAATA.GATAAGGATA	G	T	40	PASS	NA	GT	0	0	0	0	0	0	0	0	0	0	0	0	0	0	0	0	0	0	0	0	0	0	0	0	0	0	0	0	0	0	0	0	0	0	0	0	0	0	0	0	0
NC_007530	1061585	CAAAAGAAAT.CGTATCGTCT	C	T	40	PASS	NA	GT	0	0	0	0	0	0	0	0	0	0	0	0	0	0	0	0	0	1	0	0	0	0	0	0	0	0	0	0	0	0	0	0	0	0	0	0	0	0	0	0	0
NC_007530	1061763	CGAAAAAAGA.ATATCATTAT	A	G	40	PASS	NA	GT	0	0	0	0	0	0	0	0	0	0	0	0	0	0	0	0	0	0	0	0	0	0	0	0	0	0	0	0	0	0	0	0	0	0	0	0	0	0	0	0	0
NC_007530	1063272	CAAACTAAGA.TAATCCTTTT	T	C	40	PASS	NA	GT	0	0	0	0	0	0	0	0	0	0	0	0	0	0	0	0	0	0	0	0	0	0	0	0	0	0	0	0	0	0	0	0	0	0	0	0	0	0	0	0	0
NC_007530	1063773	AAAGAAGCGA.AAAAAGGAAT	A	C	40	PASS	NA	GT	0	0	0	0	0	0	0	0	0	1	0	0	0	0	0	0	0	0	0	0	0	0	0	0	0	0	0	0	0	0	0	0	0	0	0	0	0	0	0	0	0
NC_007530	1064080	CAAGTGAGTT.GCATGATGGT	G	T	40	PASS	NA	GT	0	0	1	0	0	0	0	0	0	0	0	0	0	0	0	0	0	0	0	0	0	0	0	0	0	0	0	0	0	0	0	0	0	0	0	0	0	0	0	0	0
NC_007530	1064214	GTGACAGCAG.GTTTAAATAC	G	C	40	PASS	NA	GT	0	0	0	0	0	0	0	0	0	0	0	0	0	0	0	0	0	0	0	0	0	0	0	0	0	0	0	0	0	0	0	0	0	0	0	0	0	0	0	0	0
NC_007530	1064774	AGCGACAGTT.CAGCAAAAAG	C	T	40	PASS	NA	GT	0	0	0	0	0	0	0	0	1	0	0	0	0	0	0	0	0	0	0	0	0	0	0	0	0	0	0	0	0	0	0	0	0	0	0	0	0	0	0	0	0
NC_007530	1065719	TATTCCATAC.TTCATACTCT	T	G	40	PASS	NA	GT	0	0	0	0	0	0	0	0	0	0	0	0	0	0	0	0	0	0	0	0	0	0	0	1	0	0	0	0	0	0	0	0	0	0	0	0	0	0	0	0	0
NC_007530	1066712	GAATTTATTG.TACATGGGTT	T	C	40	PASS	NA	GT	0	0	0	0	1	0	0	0	0	0	0	0	0	0	0	0	0	0	0	0	0	0	0	0	0	0	0	0	0	0	0	0	0	0	0	0	0	0	0	0	0
NC_007530	1067379	TATTATCGAA.AACTACTACA	A	C	40	PASS	NA	GT	0	0	0	0	0	0	0	0	0	1	0	0	0	0	0	0	0	0	0	0	0	0	0	0	0	0	0	0	0	0	0	0	0	0	0	0	0	0	0	0	0
NC_007530	1067893	CCTACTGTAA.ACTTCTAAAA	A	G	40	PASS	NA	GT	0	0	0	0	0	0	0	0	1	0	0	0	0	0	0	0	0	0	0	0	0	0	0	0	0	0	0	0	0	0	0	0	0	0	0	0	0	0	0	0	0
NC_007530	1068636	GAAAAATGGG.CTTTTTACGT	C	T	40	PASS	NA	GT	0	0	0	0	0	0	0	0	0	0	0	0	0	0	0	0	0	0	0	0	0	0	0	0	0	0	0	0	0	0	0	0	0	0	0	0	0	0	0	0	0
NC_007530	1069248	CCTCCATTTC.CATTTCTTAC	C	G	40	PASS	NA	GT	0	0	0	0	0	0	0	0	1	0	0	0	0	0	0	0	0	0	0	0	0	0	0	0	0	0	0	0	0	0	0	0	0	0	0	0	0	0	0	0	0
NC_007530	1069752	AATCCCGTAC.AATCCAGAAG	A	C	40	PASS	NA	GT	0	0	0	0	0	0	0	0	1	0	0	0	0	0	0	0	0	0	0	0	0	0	0	0	0	0	0	0	0	0	0	0	0	0	0	0	0	0	0	0	0
NC_007530	1070680	AAAGGAATTA.AATCAATTCG	A	T	40	PASS	NA	GT	0	0	0	0	0	0	0	0	1	0	0	0	0	0	0	0	0	0	0	0	0	0	0	0	0	0	0	0	0	0	0	0	0	0	0	0	0	0	0	0	0
NC_007530	1070818	ACAGAAGAGG.ATTGGAAAGA	A	G	40	PASS	NA	GT	0	0	0	0	0	0	0	0	0	0	0	0	0	0	0	0	0	0	0	0	0	0	0	0	0	0	0	0	0	0	0	0	0	0	0	0	0	0	0	0	0
NC_007530	1071137	TACATTTGTT.CTTCTAAAAA	C	G	40	PASS	NA	GT	0	0	0	0	0	0	0	0	0	0	0	0	0	0	0	0	0	0	0	0	0	0	0	0	0	0	0	0	0	0	0	0	0	0	0	0	0	0	0	0	0
NC_007530	1071139	CATTTGTTCT.TCTAAAAATA	T	A	40	PASS	NA	GT	0	0	0	0	0	0	0	0	0	0	0	0	0	0	0	0	0	0	0	0	0	0	0	0	0	0	0	0	0	0	0	0	0	0	0	0	0	0	0	0	0
NC_007530	1071157	TAAGGGAGGC.TACCGTAACT	T	G	40	PASS	NA	GT	0	0	0	0	0	0	0	0	0	0	0	0	0	0	0	0	0	0	0	0	0	0	0	0	0	0	0	0	0	0	0	0	0	0	0	0	0	0	0	0	0
NC_007530	1071170	CGTAACTGGC.AGCCTCTTTC	A	C	40	PASS	NA	GT	0	0	0	0	0	0	0	0	0	0	0	0	0	0	0	0	0	0	0	0	0	0	0	0	0	0	0	0	0	0	0	0	0	0	0	0	0	0	0	0	0
NC_007530	1072394	GATTTTAACC.ATACAGAAAC	A	C	40	PASS	NA	GT	0	0	0	0	0	0	0	0	0	1	0	0	0	0	0	0	0	0	0	0	0	0	0	0	0	0	0	0	0	0	0	0	0	0	0	0	0	0	0	0	0
NC_007530	1072768	TGCCGGTGTA.CCGACAATGT	C	A	40	PASS	NA	GT	0	0	1	0	0	0	0	0	0	0	0	0	0	0	0	0	0	0	0	0	0	0	0	0	0	0	0	0	0	0	0	0	0	0	0	0	0	0	0	0	0
NC_007530	1073145	TGAAAGATGG.CTGGCTGTAT	C	A	40	PASS	NA	GT	0	0	1	0	0	0	0	0	0	0	0	0	0	0	0	0	0	0	0	0	0	0	0	0	0	0	0	0	0	0	0	0	0	0	0	0	0	0	0	0	0
NC_007530	1073251	CGTATATCCT.CGTGAAGTAG	C	A	40	PASS	NA	GT	0	0	1	0	0	0	0	0	0	0	0	0	0	0	0	0	0	0	0	0	0	0	0	0	0	0	0	0	0	0	0	0	0	0	0	0	0	0	0	0	0
NC_007530	1073861	AAATGAGCGG.AAAGCGTACT	A	T	40	PASS	NA	GT	0	0	0	0	0	0	0	0	0	1	0	0	0	0	0	0	0	0	0	0	0	0	0	0	0	0	0	0	0	0	0	0	0	0	0	0	0	0	0	0	0
NC_007530	1074472	TGAACAGAAG.CCTAAATTCT	C	T	40	PASS	NA	GT	0	0	0	0	0	0	0	0	0	0	0	0	0	0	0	0	0	0	0	0	0	0	1	0	0	0	0	0	0	0	1	0	0	0	0	0	0	0	0	0	0
NC_007530	1074560	CCAGATGGTA.CATTTGCTCC	C	A	40	PASS	NA	GT	0	0	1	0	0	0	0	0	0	0	0	0	0	0	0	0	0	0	0	0	0	0	0	0	0	0	0	0	0	0	0	0	0	0	0	0	0	0	0	0	0
NC_007530	1074569	ACATTTGCTC.CGGCTGAAAG	C	T	40	PASS	NA	GT	0	0	0	0	1	1	0	0	0	0	0	0	0	0	0	0	0	0	0	0	0	0	0	0	0	0	0	0	0	0	0	0	0	0	0	0	0	0	0	0	0
NC_007530	1077215	GGAACAAGTG.AAAAAGCCAG	A	T	40	PASS	NA	GT	0	0	0	0	0	0	0	0	1	0	0	0	0	0	0	0	0	0	0	0	0	0	0	0	0	0	0	0	0	0	0	0	0	0	0	0	0	0	0	0	0
NC_007530	1077243	GCGTATATCA.ATGCGACAGA	A	T	40	PASS	NA	GT	0	0	0	0	0	0	0	0	1	0	0	0	0	0	0	0	0	0	0	0	0	0	0	0	0	0	0	0	0	0	0	0	0	0	0	0	0	0	0	0	0
NC_007530	1077693	GGTAACTTTA.TCATGAGTGA	T	A	40	PASS	NA	GT	0	0	0	0	0	0	0	0	1	0	0	0	0	0	0	0	0	0	0	0	0	0	0	0	0	0	0	0	0	0	0	0	0	0	0	0	0	0	0	0	0
NC_007530	1080662	TTTAGTAGTA.GGTACATCAA	G	T	40	PASS	NA	GT	0	0	1	0	0	0	0	0	0	0	0	0	0	0	0	0	0	0	0	0	0	0	0	0	0	0	0	0	0	0	0	0	0	0	0	0	0	0	0	0	0
NC_007530	1081744	GGAACAAAGG.GAAAAGTATA	G	A	40	PASS	NA	GT	0	0	0	0	0	1	0	0	0	0	0	0	0	0	0	0	0	0	0	0	0	0	0	0	0	0	0	0	0	0	0	0	0	0	0	0	0	0	0	0	0
NC_007530	1082681	AGCAGACTAC.AAGAGCAGGG	A	G	40	PASS	NA	GT	0	0	0	0	0	0	0	0	1	0	0	0	0	0	0	0	0	0	0	0	0	0	0	0	0	0	0	0	0	0	0	0	0	0	0	0	0	0	0	0	0
NC_007530	1082792	GAGATGAGTA.TCCTAAGTGA	T	C	40	PASS	NA	GT	0	1	1	1	1	1	1	1	1	1	1	1	1	1	1	1	1	1	1	1	1	1	1	1	1	1	1	1	1	1	1	1	1	1	1	1	1	1	1	1	1
NC_007530	1084500	TTGATTTCGC.TTTTAAACAA	T	C	40	PASS	NA	GT	0	0	0	0	0	0	0	0	0	0	0	0	0	0	0	0	0	0	0	0	0	0	0	0	0	0	0	0	0	0	0	0	0	0	0	0	0	0	0	0	0
NC_007530	1085019	AATGAAGATG.AACAATTAAC	A	G	40	PASS	NA	GT	0	0	0	0	0	0	0	0	1	0	0	0	0	0	0	0	0	0	0	0	0	0	0	0	0	0	0	0	0	0	0	0	0	0	0	0	0	0	0	0	0
NC_007530	1086163	ATATATTCCT.CTTCATCAAC	C	T	40	PASS	NA	GT	0	0	0	0	0	0	0	0	0	0	0	0	0	0	0	0	0	0	0	0	0	0	0	0	0	0	0	0	0	0	0	0	0	0	0	0	0	0	0	0	0
NC_007530	1086203	AAACGCAACG.CCACTATCAA	C	T	40	PASS	NA	GT	0	1	1	1	1	1	1	1	1	1	1	1	1	1	1	1	1	1	1	1	1	1	1	1	1	1	1	1	1	1	1	1	1	1	1	1	1	1	1	1	1
NC_007530	1086965	TTACGCTTTC.ATAGTTGGCT	A	T	40	PASS	NA	GT	0	0	0	0	0	0	0	0	0	0	0	0	0	0	0	0	0	0	0	0	0	0	0	0	0	0	0	0	0	0	0	0	0	0	0	0	0	0	0	0	0
NC_007530	1086968	CGCTTTCATA.GTTGGCTCCA	G	T	40	PASS	NA	GT	0	0	0	0	0	0	0	0	0	0	0	0	0	0	0	0	0	0	0	0	0	0	0	0	0	0	0	0	0	0	0	0	0	0	0	0	0	0	0	0	0
NC_007530	1086971	TTTCATAGTT.GGCTCCATTT	G	A	40	PASS	NA	GT	0	0	0	0	0	0	0	0	0	0	0	0	0	0	0	0	0	0	0	0	0	0	0	0	0	0	0	0	0	0	0	0	0	0	0	0	0	0	0	0	0
NC_007530	1086976	TAGTTGGCTC.CATTTCGTAT	C	G	40	PASS	NA	GT	0	0	0	0	0	0	0	0	0	0	0	0	0	0	0	0	0	0	0	0	0	0	0	0	0	0	0	0	0	0	0	0	0	0	0	0	0	0	0	0	0
NC_007530	1087960	AGAGCTAATG.GCTCTCTATT	G	A	40	PASS	NA	GT	0	0	0	0	0	0	0	0	0	0	0	0	0	0	0	0	1	0	0	0	0	0	0	0	0	0	0	0	0	0	0	0	0	0	0	0	0	0	0	0	0
NC_007530	1087962	AGCTAATGGC.TCTCTATTTT	T	G	40	PASS	NA	GT	0	0	0	0	0	0	0	0	0	0	0	0	0	0	0	0	0	0	0	0	0	0	0	0	0	0	0	0	0	0	0	0	0	0	0	0	0	0	0	0	0
NC_007530	1087963	GCTAATGGCT.CTCTATTTTT	C	A	40	PASS	NA	GT	0	0	0	0	0	0	0	0	0	0	0	0	0	0	0	0	0	0	0	0	0	0	0	0	0	0	0	0	0	0	0	0	0	0	0	0	0	0	0	0	0
NC_007530	1088002	ATATAAGGAG.CACTCAATAA	C	A	40	PASS	NA	GT	0	0	0	0	0	0	0	0	0	0	0	0	0	0	0	0	0	0	0	0	0	0	0	0	0	0	0	0	0	0	0	0	0	0	0	0	0	0	0	0	0
NC_007530	1088068	TTTAAAATTT.GATATCTATA	G	T	40	PASS	NA	GT	0	0	0	0	0	0	0	0	0	0	0	0	0	0	0	0	0	0	0	0	0	0	0	0	0	0	0	0	0	0	0	0	0	0	0	0	0	0	0	0	0
NC_007530	1089796	TGTCAGTTAC.AGATGATAAG	A	G	40	PASS	NA	GT	0	0	0	0	0	0	0	0	0	0	0	0	0	0	0	0	0	0	0	0	0	0	0	0	0	0	0	0	1	0	0	0	0	0	0	0	0	0	0	0	0
NC_007530	1091931	TAGAAAAATC.CGTTTCTTTT	C	A	40	PASS	NA	GT	0	0	1	0	0	0	0	0	0	0	0	0	0	0	0	0	0	0	0	0	0	0	0	0	0	0	0	0	0	0	0	0	0	0	0	0	0	0	0	0	0
NC_007530	1092966	GCGCCTTTTC.TACGAACAAA	T	C	40	PASS	NA	GT	0	0	0	0	0	0	0	0	0	0	0	0	0	0	0	0	0	0	0	0	0	0	0	0	0	0	0	0	0	0	0	0	0	0	0	0	0	0	0	0	0
NC_007530	1093781	TAGGTTTCCC.TTTTTTACTA	T	C	40	PASS	NA	GT	0	0	0	0	0	0	0	0	0	0	0	0	0	0	0	0	0	0	0	0	0	0	0	0	0	0	0	1	0	0	0	0	0	0	0	0	0	0	0	0	0
NC_007530	1094285	TTAACATGCC.GCCGTAAATA	G	T	40	PASS	NA	GT	0	0	1	0	0	0	0	0	0	0	0	0	0	0	0	0	0	0	0	0	0	0	0	0	0	0	0	0	0	0	0	0	0	0	0	0	0	0	0	0	0
NC_007530	1094349	TGTATAAGGA.TTTTCTATAT	T	A	40	PASS	NA	GT	0	0	0	0	0	0	0	0	0	0	0	0	0	0	0	0	0	0	0	0	0	0	0	0	0	0	0	0	0	0	0	0	0	0	0	0	0	0	0	0	0
NC_007530	1094392	GATGCTTTCG.TATAAGATGT	T	C	40	PASS	NA	GT	0	0	0	0	0	0	0	0	0	0	0	0	0	0	0	0	0	0	0	0	0	0	0	1	0	0	0	0	0	0	0	0	0	0	0	0	0	0	0	0	0
NC_007530	1096184	CATGTTAAAC.AATGCATTTG	A	T	40	PASS	NA	GT	0	0	0	0	0	0	0	0	1	0	0	0	0	0	0	0	0	0	0	0	0	0	0	0	0	0	0	0	0	0	0	0	0	0	0	0	0	0	0	0	0
NC_007530	1098708	ATGCTACTTC.TTTTTTTATA	T	C	40	PASS	NA	GT	0	0	0	0	0	0	0	0	0	0	0	0	0	0	0	0	0	0	0	0	0	0	0	0	0	0	0	0	0	0	0	0	0	0	0	0	0	0	0	0	0
NC_007530	1101562	GGATTTAGAC.TGACTAGTAT	T	C	40	PASS	NA	GT	0	1	1	1	1	1	1	1	1	1	1	1	1	1	1	1	1	1	1	1	1	1	1	1	1	1	1	1	1	1	1	1	1	1	1	1	1	1	1	1	1
NC_007530	1110955	TCGTATTTGT.ATTGGCGAAT	A	C	40	PASS	NA	GT	0	0	0	0	0	0	0	0	1	0	0	0	0	0	0	0	0	0	0	0	0	0	0	0	0	0	0	0	0	0	0	0	0	0	0	0	0	0	0	0	0
NC_007530	1111718	ATCGGTTTAC.CTGGGGATCA	C	T	40	PASS	NA	GT	0	0	0	0	0	0	0	0	0	0	0	0	0	0	0	0	0	0	0	0	0	0	1	0	0	0	0	0	0	0	1	0	0	0	0	0	0	0	0	0	0
NC_007530	1112055	AAAGACAAAC.TACTCTGTTT	T	G	40	PASS	NA	GT	0	0	0	0	0	0	0	0	0	0	0	0	0	0	0	0	0	0	0	0	0	0	0	0	0	0	0	0	0	0	0	0	0	0	0	0	0	0	0	0	0
NC_007530	1112441	AAATTGTAGA.GTCTCGTAAA	G	A	40	PASS	NA	GT	0	0	0	0	0	0	0	0	0	1	0	0	0	0	0	0	0	0	0	0	0	0	0	0	0	0	0	0	0	0	0	0	0	0	0	0	0	0	0	0	0
NC_007530	1116568	AGGATATTGT.CAAACAAGTA	C	T	40	PASS	NA	GT	0	0	0	0	1	1	0	0	0	0	0	0	0	0	0	0	0	0	0	0	0	0	0	0	0	0	0	0	0	0	0	0	0	0	0	0	0	0	0	0	0
NC_007530	1117943	GTTTAGAGGA.CTATTCCGCT	C	A	40	PASS	NA	GT	0	0	1	0	0	0	0	0	0	0	0	0	0	0	0	0	0	0	0	0	0	0	0	0	0	0	0	0	0	0	0	0	0	0	0	0	0	0	0	0	0
NC_007530	1118193	CGTAAACGAA.TTAAATATAC	T	C	40	PASS	NA	GT	0	0	0	0	1	1	0	0	0	0	0	0	0	0	0	0	0	0	0	0	0	0	0	0	0	0	0	0	0	0	0	0	0	0	0	0	0	0	0	0	0
NC_007530	1118421	TCTTGTTATT.TAGACTGGAT	T	C	40	PASS	NA	GT	0	0	0	0	0	0	0	0	1	0	0	0	0	0	0	0	0	0	0	0	0	0	0	0	0	0	0	0	0	0	0	0	0	0	0	0	0	0	0	0	0
NC_007530	1119631	CATCTTTGCC.AAAGCTTAGA	A	G	40	PASS	NA	GT	0	0	0	0	0	0	0	0	0	0	0	0	0	0	0	0	0	0	0	0	0	0	0	0	0	0	0	0	0	0	0	0	0	0	0	0	0	0	0	0	0
NC_007530	1120096	TAATTCAACG.CTATTCACTT	C	T	40	PASS	NA	GT	0	1	1	1	1	1	1	1	1	1	1	1	1	1	1	1	1	1	1	1	1	1	1	1	1	1	1	1	1	1	1	1	1	1	1	1	1	1	1	1	1
NC_007530	1121145	GTACTTGAAG.AGCTTGTTGA	A	T	40	PASS	NA	GT	0	0	0	0	0	0	0	0	0	1	0	0	0	0	0	0	0	0	0	0	0	0	0	0	0	0	0	0	0	0	0	0	0	0	0	0	0	0	0	0	0
NC_007530	1121267	TAAGAAGAAC.TAGTTGATGG	T	A	40	PASS	NA	GT	0	0	0	0	0	0	0	0	0	1	0	0	0	0	0	0	0	0	0	0	0	0	0	0	0	0	0	0	0	0	0	0	0	0	0	0	0	0	0	0	0
NC_007530	1121787	ATAAAAGAAA.CACACACGTT	C	A	40	PASS	NA	GT	0	0	0	0	0	0	0	0	0	0	0	0	0	0	0	0	0	0	0	0	0	0	0	0	0	0	0	0	0	0	0	0	0	0	0	0	0	0	0	0	0
NC_007530	1121982	ATTGAAATCG.GCTCCATCTC	G	A	40	PASS	NA	GT	0	0	0	0	0	0	0	0	0	1	0	0	0	0	0	0	0	0	0	0	0	0	0	0	0	0	0	0	0	0	0	0	0	0	0	0	0	0	0	0	0
NC_007530	1122146	AAAATTAGCG.TGTATGAGAA	T	G	40	PASS	NA	GT	0	0	0	0	0	0	0	0	0	1	0	0	0	0	0	0	0	0	0	0	0	0	0	0	0	0	0	0	0	0	0	0	0	0	0	0	0	0	0	0	0
NC_007530	1122707	AATAAAAAAA.GAAAAAGCGC	G	A	40	PASS	NA	GT	0	0	0	0	0	0	0	0	0	0	0	0	0	0	0	0	0	0	0	0	0	0	0	0	0	0	0	0	0	0	0	0	0	0	0	0	0	0	0	0	0
NC_007530	1123148	TTACTAGATA.GCTCTTTTTT	G	A	40	PASS	NA	GT	0	0	0	0	0	0	0	0	1	0	0	0	0	0	0	0	0	0	0	0	0	0	0	0	0	0	0	0	0	0	0	0	0	0	0	0	0	0	0	0	0
NC_007530	1124615	GTCCATATAG.CGGTTTCCTT	C	T	40	PASS	NA	GT	0	0	0	0	0	0	0	0	0	0	0	0	0	0	0	0	0	0	0	0	0	0	0	0	0	0	0	0	0	0	0	0	0	0	1	1	0	0	0	0	0
NC_007530	1124637	GGATCTTCTA.CCCAAACGCC	C	A	40	PASS	NA	GT	0	0	0	0	0	0	0	0	0	0	0	0	0	0	0	0	1	0	0	0	0	0	0	0	0	0	0	0	0	0	0	0	0	0	0	0	0	0	0	0	0
NC_007530	1125455	TTACTCCTTC.GCATGTTTCC	G	A	40	PASS	NA	GT	0	1	1	1	1	1	1	1	1	1	1	1	1	1	1	1	1	1	1	1	1	1	1	1	1	1	1	1	1	1	1	1	1	1	1	1	1	1	1	1	1
NC_007530	1127425	CAAGAAGTTC.CTATTTTAGA	C	A	40	PASS	NA	GT	0	0	0	0	0	0	0	0	1	0	0	0	0	0	0	0	0	0	0	0	0	0	0	0	0	0	0	0	0	0	0	0	0	0	0	0	0	0	0	0	0
NC_007530	1127982	TAAGTAAGTC.GCTTTTTATT	G	C	40	PASS	NA	GT	0	0	0	0	0	0	0	0	0	0	0	0	0	0	0	0	0	0	0	0	0	0	0	0	0	0	0	0	0	0	0	0	0	0	0	0	0	0	0	0	0
NC_007530	1128011	TTCATATAAA.ATTCAAAATC	A	G	40	PASS	NA	GT	0	0	0	0	1	1	0	0	0	0	0	0	0	0	0	0	0	0	0	0	0	0	0	0	0	0	0	0	0	0	0	0	0	0	0	0	0	0	0	0	0
NC_007530	1128665	GAAAGCGGTC.GTAATTTTTT	G	C	40	PASS	NA	GT	0	0	0	0	0	0	0	0	0	1	0	0	0	0	0	0	0	0	0	0	0	0	0	0	0	0	0	0	0	0	0	0	0	0	0	0	0	0	0	0	0
NC_007530	1130733	ATCGATATAT.CGTGTCGAAA	C	A	40	PASS	NA	GT	0	0	1	0	0	0	0	0	0	0	0	0	0	0	0	0	0	0	0	0	0	0	0	0	0	0	0	0	0	0	0	0	0	0	0	0	0	0	0	0	0
NC_007530	1131633	TGTAATATGA.ACGACATTAC	A	G	40	PASS	NA	GT	0	0	0	0	0	0	0	0	1	0	0	0	0	0	0	0	0	0	0	0	0	0	0	0	0	0	0	0	0	0	0	0	0	0	0	0	0	0	0	0	0
NC_007530	1131634	GTAATATGAA.CGACATTACC	C	T	40	PASS	NA	GT	0	0	0	0	0	0	0	0	1	0	0	0	0	0	0	0	0	0	0	0	0	0	0	0	0	0	0	0	0	0	0	0	0	0	0	0	0	0	0	0	0
NC_007530	1131635	TAATATGAAC.GACATTACCG	G	A	40	PASS	NA	GT	0	0	0	0	0	0	0	0	1	0	0	0	0	0	0	0	0	0	0	0	0	0	0	0	0	0	0	0	0	0	0	0	0	0	0	0	0	0	0	0	0
NC_007530	1131906	TAAACCGAAC.TAATCGAGTG	T	C	40	PASS	NA	GT	0	1	1	1	1	1	1	1	1	1	1	1	1	1	1	1	1	1	1	1	1	1	1	1	1	1	1	1	1	1	1	1	1	1	1	1	1	1	1	1	1
NC_007530	1134110	AAACAAAAAA.TTTAAATATA	T	A	40	PASS	NA	GT	0	0	1	1	1	1	1	0	0	0	0	0	0	0	0	0	1	0	0	0	0	1	0	0	0	0	0	0	0	0	0	0	0	0	0	0	0	0	0	0	0
NC_007530	1134120	TTTAAATATA.CAGAAAATGT	C	T	40	PASS	NA	GT	0	1	1	1	1	1	1	1	1	1	1	1	1	1	1	1	1	1	1	1	1	1	1	1	1	1	1	1	1	1	1	1	1	1	1	1	1	1	1	1	1
NC_007530	1135752	TACTTTTAAT.TTCATTTCTT	T	A	40	PASS	NA	GT	0	0	0	0	0	0	0	0	1	0	0	0	0	0	0	0	0	0	0	0	0	0	0	0	0	0	0	0	0	0	0	0	0	0	0	0	0	0	0	0	0
NC_007530	1135753	ACTTTTAATT.TCATTTCTTT	T	A	40	PASS	NA	GT	0	0	0	0	0	0	0	0	1	0	0	0	0	0	0	0	0	0	0	0	0	0	0	0	0	0	0	0	0	0	0	0	0	0	0	0	0	0	0	0	0
NC_007530	1138672	GTGTACGATG.AAATCAAAGG	A	G	40	PASS	NA	GT	0	0	0	0	0	0	0	0	0	0	0	0	0	0	0	0	0	0	0	0	0	0	1	0	0	0	0	0	0	0	1	0	0	0	0	0	0	0	0	0	0
NC_007530	1138757	TTGCGCGCGC.TTTGCATTGT	T	G	40	PASS	NA	GT	0	0	0	0	0	0	0	0	1	0	0	0	0	0	0	0	0	0	0	0	0	0	0	0	0	0	0	0	0	0	0	0	0	0	0	0	0	0	0	0	0
NC_007530	1138758	TGCGCGCGCT.TTGCATTGTT	T	A	40	PASS	NA	GT	0	0	0	0	0	0	0	0	1	0	0	0	0	0	0	0	0	0	0	0	0	0	0	0	0	0	0	0	0	0	0	0	0	0	0	0	0	0	0	0	0
NC_007530	1139365	AGATTAAAGA.CAAGCCTGTC	C	A	40	PASS	NA	GT	0	0	0	0	0	0	0	0	0	0	0	0	0	0	0	0	0	0	0	0	0	0	0	0	0	0	0	1	0	0	0	0	0	0	0	0	0	0	0	0	0
NC_007530	1140171	TCGACGCGCT.GACTTGTGCG	G	T	40	PASS	NA	GT	0	0	1	0	0	0	0	0	0	0	0	0	0	0	0	0	0	0	0	0	0	0	0	0	0	0	0	0	0	0	0	0	0	0	0	0	0	0	0	0	0
NC_007530	1140226	AAGCAGGGAA.TTTTTAGATT	T	C	40	PASS	NA	GT	0	0	0	0	0	0	0	0	1	0	0	0	0	0	0	0	0	0	0	0	0	0	0	0	0	0	0	0	0	0	0	0	0	0	0	0	0	0	0	0	0
NC_007530	1140227	AGCAGGGAAT.TTTTAGATTA	T	G	40	PASS	NA	GT	0	0	0	0	0	0	0	0	1	0	0	0	0	0	0	0	0	0	0	0	0	0	0	0	0	0	0	0	0	0	0	0	0	0	0	0	0	0	0	0	0
NC_007530	1140240	TAGATTACAA.CCCAAGAACC	C	T	40	PASS	NA	GT	0	0	0	0	0	0	0	0	1	0	0	0	0	0	0	0	0	0	0	0	0	0	0	0	0	0	0	0	0	0	0	0	0	0	0	0	0	0	0	0	0
NC_007530	1143030	GTAAATATTC.ATGACCGCGC	A	G	40	PASS	NA	GT	0	0	0	0	0	1	0	0	0	0	0	0	0	0	0	0	0	0	0	0	0	0	0	0	0	0	0	0	0	0	0	0	0	0	0	0	0	0	0	0	0
NC_007530	1143624	AAATTATTAC.GCTTAGAGCA	G	A	40	PASS	NA	GT	0	0	0	0	0	0	0	0	0	0	0	0	0	0	0	0	0	0	0	0	0	0	0	0	0	0	0	0	0	0	0	0	0	0	0	0	0	0	0	1	1
NC_007530	1144767	TCGTTCAATC.TGTCCTTATT	T	A	40	PASS	NA	GT	0	0	0	0	0	0	0	0	0	0	0	0	0	0	0	0	0	0	0	0	0	0	0	0	0	0	0	0	0	0	0	0	0	0	0	0	0	0	0	0	0
NC_007530	1145595	GTTAGGCAAA.CGACTGATTT	C	T	40	PASS	NA	GT	0	0	0	0	0	0	0	0	0	0	0	0	0	0	0	0	0	0	0	0	0	0	0	0	1	0	0	0	0	0	0	0	0	0	0	0	0	0	0	0	0
NC_007530	1148920	TGATGCATTC.CATATTACAA	C	A	40	PASS	NA	GT	0	0	0	0	0	0	0	0	1	0	0	0	0	0	0	0	0	0	0	0	0	0	0	0	0	0	0	0	0	0	0	0	0	0	0	0	0	0	0	0	0
NC_007530	1150257	ATATAAAAAA.CAGGAGCTCT	C	A	40	PASS	NA	GT	0	0	0	0	0	0	0	0	0	0	0	0	0	0	0	0	0	0	0	0	0	0	0	0	0	0	0	0	0	0	0	0	0	0	0	0	0	0	0	0	0
NC_007530	1150267	CAGGAGCTCT.CTTTCCTGTT	C	T	40	PASS	NA	GT	0	0	0	0	0	0	0	0	0	0	0	0	0	0	0	0	0	0	0	0	0	0	0	0	0	0	0	0	0	0	0	0	0	0	0	0	0	0	0	0	0
NC_007530	1150283	TGTTTTTTTA.GTATTAATAG	G	T	40	PASS	NA	GT	0	0	0	0	0	0	0	0	0	0	0	0	0	0	0	0	0	0	0	0	0	0	0	0	0	0	0	0	0	0	0	0	0	0	0	0	0	0	0	0	0
NC_007530	1151067	CGAACAATTA.TGCGAGCGTC	T	A	40	PASS	NA	GT	0	0	0	0	0	0	0	0	1	0	0	0	0	0	0	0	0	0	0	0	0	0	0	0	0	0	0	0	0	0	0	0	0	0	0	0	0	0	0	0	0
NC_007530	1151068	GAACAATTAT.GCGAGCGTCT	G	A	40	PASS	NA	GT	0	0	0	0	0	0	0	0	1	0	0	0	0	0	0	0	0	0	0	0	0	0	0	0	0	0	0	0	0	0	0	0	0	0	0	0	0	0	0	0	0
NC_007530	1151888	TTTGGAATGC.GGATTTCAGG	G	T	40	PASS	NA	GT	0	0	0	0	0	0	0	0	1	0	0	0	0	0	0	0	0	0	0	0	0	0	0	0	0	0	0	0	0	0	0	0	0	0	0	0	0	0	0	0	0
NC_007530	1151889	TTGGAATGCG.GATTTCAGGA	G	T	40	PASS	NA	GT	0	0	0	0	0	0	0	0	1	0	0	0	0	0	0	0	0	0	0	0	0	0	0	0	0	0	0	0	0	0	0	0	0	0	0	0	0	0	0	0	0
NC_007530	1152247	GATGTTTTTA.CGAAGTTGTA	C	T	40	PASS	NA	GT	0	0	0	0	0	0	0	0	0	0	0	0	0	0	0	0	0	0	0	0	0	0	0	0	0	0	0	0	0	0	0	0	0	0	0	0	0	0	0	0	0
NC_007530	1152798	TATGGGATAG.TGTTTGCAAA	T	C	40	PASS	NA	GT	0	0	0	0	0	0	0	0	0	0	0	0	0	0	0	0	0	0	0	0	0	0	0	0	0	0	0	0	1	0	0	0	0	0	0	0	0	0	0	0	0
NC_007530	1153615	AAGAAAAATC.CTCAAACAAG	C	T	40	PASS	NA	GT	0	0	0	0	0	0	0	0	0	0	0	0	0	0	0	0	0	0	0	0	0	0	0	0	0	0	0	0	0	0	0	0	0	0	0	0	0	0	0	0	0
NC_007530	1153645	ATCTAACTGA.AACAGCTGAA	A	T	40	PASS	NA	GT	0	0	0	0	0	0	0	0	1	0	0	0	0	0	0	0	0	0	0	0	0	0	0	0	0	0	0	0	0	0	0	0	0	0	0	0	0	0	0	0	0
NC_007530	1153828	TACGTGAAGA.TGCGAAATGG	T	G	40	PASS	NA	GT	0	0	0	0	0	0	0	0	0	1	0	0	0	0	0	0	0	0	0	0	0	0	0	0	0	0	0	0	0	0	0	0	0	0	0	0	0	0	0	0	0
NC_007530	1154330	AGTCTTAACA.TCAGAGTTTG	T	G	40	PASS	NA	GT	0	0	0	0	0	0	0	0	0	0	0	0	0	0	0	0	0	0	0	0	0	0	0	0	0	0	0	0	0	0	0	0	0	0	0	0	0	0	0	0	0
NC_007530	1154331	GTCTTAACAT.CAGAGTTTGT	C	G	40	PASS	NA	GT	0	0	0	0	0	0	0	0	0	0	0	0	0	0	0	0	0	0	0	0	0	0	0	0	0	0	0	0	0	0	0	0	0	0	0	0	0	0	0	0	0
NC_007530	1154332	TCTTAACATC.AGAGTTTGTA	A	T	40	PASS	NA	GT	0	0	0	0	0	0	0	0	0	0	0	0	0	0	0	0	0	0	0	0	0	0	0	0	0	0	0	0	0	0	0	0	0	0	0	0	0	0	0	0	0
NC_007530	1154350	TAGATAAATA.CAAATCAGAT	C	T	40	PASS	NA	GT	0	0	0	0	0	0	0	0	0	0	0	0	0	0	0	0	0	0	0	0	0	0	0	0	0	0	0	0	0	0	0	0	0	0	0	0	0	0	0	0	0
NC_007530	1154416	TAAATGAAAA.GAATAAATTT	G	A	40	PASS	NA	GT	0	0	0	0	0	0	0	0	0	0	0	0	0	0	0	0	0	0	0	0	0	0	0	0	0	0	0	0	0	0	0	0	0	0	0	0	0	0	0	0	0
NC_007530	1155270	CTTGACTATG.GGACGTTATG	G	T	40	PASS	NA	GT	0	1	0	0	0	0	0	1	0	0	1	1	1	1	0	0	0	0	0	0	0	0	0	0	0	0	0	0	0	0	0	0	0	0	0	0	0	0	0	0	0
NC_007530	1155272	TGACTATGGG.ACGTTATGTA	A	G	40	PASS	NA	GT	0	1	0	0	0	0	0	1	0	0	1	1	1	1	0	0	0	0	0	0	0	0	0	0	0	0	0	0	0	0	0	0	0	0	0	0	0	0	0	0	0
NC_007530	1156383	GCAATTTTAG.GACCGATGGT	G	T	40	PASS	NA	GT	0	0	1	0	0	0	0	0	0	0	0	0	0	0	0	0	0	0	0	0	0	0	0	0	0	0	0	0	0	0	0	0	0	0	0	0	0	0	0	0	0
NC_007530	1156569	GATCTTGGCC.GCGATTTATG	G	T	40	PASS	NA	GT	0	0	0	0	0	0	1	0	0	0	0	0	0	0	0	0	0	0	0	0	0	0	0	0	0	0	0	0	0	0	0	0	0	0	0	0	0	0	0	0	0
NC_007530	1156571	TCTTGGCCGC.GATTTATGGA	G	T	40	PASS	NA	GT	0	0	0	0	0	0	0	0	0	0	0	0	0	0	0	0	0	0	0	0	0	0	0	0	0	0	0	0	0	0	0	0	0	0	0	0	0	0	0	0	0
NC_007530	1157912	CGTAGCAGTT.ATGTACGCTG	A	G	40	PASS	NA	GT	0	0	0	0	0	0	0	0	0	0	0	0	0	0	0	0	0	1	0	0	0	0	0	0	0	0	0	0	0	0	0	0	0	0	0	0	0	0	0	0	0
NC_007530	1158111	AACCCGCAGG.CACTGAAAAT	C	A	40	PASS	NA	GT	0	0	0	0	0	0	0	0	1	0	0	0	0	0	0	0	0	0	0	0	0	0	0	0	0	0	0	0	0	0	0	0	0	0	0	0	0	0	0	0	0
NC_007530	1158112	ACCCGCAGGC.ACTGAAAATT	A	G	40	PASS	NA	GT	0	0	0	0	0	0	0	0	1	0	0	0	0	0	0	0	0	0	0	0	0	0	0	0	0	0	0	0	0	0	0	0	0	0	0	0	0	0	0	0	0
NC_007530	1158251	TCAAATGAAA.GCAGGTGAAC	G	A	40	PASS	NA	GT	0	0	0	0	0	0	0	0	0	1	0	0	0	0	0	0	0	0	0	0	0	0	0	0	0	0	0	0	0	0	0	0	0	0	0	0	0	0	0	0	0
NC_007530	1159598	CACCAGCTGC.GCGAAGTGAA	G	T	40	PASS	NA	GT	0	0	1	0	0	0	0	0	0	0	0	0	0	0	0	0	0	0	0	0	0	0	0	0	0	0	0	0	0	0	0	0	0	0	0	0	0	0	0	0	0
NC_007530	1159919	ATTGTCTAGC.CGCTAACGAT	C	A	40	PASS	NA	GT	0	0	1	0	0	0	0	0	0	0	0	0	0	0	0	0	0	0	0	0	0	0	0	0	0	0	0	0	0	0	0	0	0	0	0	0	0	0	0	0	0
NC_007530	1241349	ATGGTTTAAT.TGACCACTTA	T	C	40	PASS	NA	GT	0	0	0	0	0	0	0	0	0	0	0	0	0	0	0	0	0	1	0	0	0	0	0	0	0	0	0	0	0	0	0	0	0	0	0	0	0	0	0	0	0
NC_007530	1241470	AATTGAAGGC.ACGCAAGCGA	A	T	40	PASS	NA	GT	0	0	0	0	0	0	0	0	1	0	0	0	0	0	0	0	0	0	0	0	0	0	0	0	0	0	0	0	0	0	0	0	0	0	0	0	0	0	0	0	0
NC_007530	1241696	ACGCCAACAA.GTTTCTCACC	G	T	40	PASS	NA	GT	0	0	0	0	0	0	0	0	0	1	0	0	0	0	0	0	0	0	0	0	0	0	0	0	0	0	0	0	0	0	0	0	0	0	0	0	0	0	0	0	0
NC_007530	1242468	ATTCAGCTTA.CACAGATAAC	C	A	40	PASS	NA	GT	0	0	1	0	0	0	0	0	0	0	0	0	0	0	0	0	0	0	0	0	0	0	0	0	0	0	0	0	0	0	0	0	0	0	0	0	0	0	0	0	0
NC_007530	1242501	ATCCAGGACA.CGGTTTCCTT	C	A	40	PASS	NA	GT	0	0	0	0	0	0	0	0	0	0	0	0	0	0	0	0	0	0	0	0	0	0	1	0	0	0	0	0	0	0	1	0	0	0	0	0	0	0	0	0	0
NC_007530	1242677	TATAATGGCT.TAGCGGGTGT	T	A	40	PASS	NA	GT	0	0	0	0	0	0	0	0	1	0	0	0	0	0	0	0	0	0	0	0	0	0	0	0	0	0	0	0	0	0	0	0	0	0	0	0	0	0	0	0	0
NC_007530	1242678	ATAATGGCTT.AGCGGGTGTA	A	T	40	PASS	NA	GT	0	0	0	0	0	0	0	0	1	0	0	0	0	0	0	0	0	0	0	0	0	0	0	0	0	0	0	0	0	0	0	0	0	0	0	0	0	0	0	0	0
NC_007530	1242851	ACCGAAAGAT.TCTCTTTCGG	T	C	40	PASS	NA	GT	0	0	0	0	0	0	0	0	0	0	0	0	0	0	0	0	0	0	0	0	0	0	0	0	0	0	0	0	0	0	0	0	0	0	0	0	0	0	0	0	0
NC_007530	1242852	CCGAAAGATT.CTCTTTCGGT	C	A	40	PASS	NA	GT	0	0	0	0	0	0	0	0	0	0	0	0	0	0	0	0	0	0	0	0	0	0	0	0	0	0	0	0	0	0	0	0	0	0	0	0	0	0	0	0	0
NC_007530	1242853	CGAAAGATTC.TCTTTCGGTA	T	C	40	PASS	NA	GT	0	0	0	0	0	0	0	0	0	0	0	0	0	0	0	0	0	0	0	0	0	0	0	0	0	0	0	0	0	0	0	0	0	0	0	0	0	0	0	0	0
NC_007530	1242863	TCTTTCGGTA.GTTTTTTTGT	G	A	40	PASS	NA	GT	0	0	0	0	0	0	0	0	0	0	0	0	0	0	0	0	0	0	0	0	0	0	0	0	0	0	0	0	0	0	0	0	0	0	0	0	0	0	0	0	0
NC_007530	1242867	TCGGTAGTTT.TTTTGTGAGC	T	A	40	PASS	NA	GT	0	0	0	0	0	0	0	0	0	0	0	0	0	0	0	0	0	0	0	0	0	0	0	0	0	0	0	0	0	0	0	0	0	0	0	0	0	0	0	0	0
NC_007530	1243366	AGCAATTGCA.CCGCTTGTAG	C	A	40	PASS	NA	GT	0	0	1	0	0	0	0	0	0	0	0	0	0	0	0	0	0	0	0	0	0	0	0	0	0	0	0	0	0	0	0	0	0	0	0	0	0	0	0	0	0
NC_007530	1245410	AAAAGAATAT.CACCTTGGAC	C	A	40	PASS	NA	GT	0	0	0	0	0	0	0	0	0	0	0	0	0	0	0	0	0	0	0	0	0	0	0	0	0	0	0	0	0	0	0	0	0	0	0	0	0	0	0	0	0
NC_007530	1248395	GAAGTTGCAT.CAATATGAGG	C	T	40	PASS	NA	GT	0	0	0	0	0	0	0	0	0	0	0	0	0	0	0	0	0	0	0	0	0	0	0	0	0	0	0	0	0	0	0	0	0	0	0	0	0	0	0	0	0
NC_007530	1251984	AAATGACTGT.GCCAGCGAAA	G	A	40	PASS	NA	GT	0	0	0	0	0	0	0	0	0	0	0	0	0	0	0	0	0	0	0	0	0	0	0	0	0	0	0	0	0	0	0	0	0	0	0	0	0	0	0	0	0
NC_007530	1251991	TGTGCCAGCG.AAATGGAATG	A	G	40	PASS	NA	GT	0	0	0	0	0	0	0	0	1	0	0	0	0	0	0	0	0	0	0	0	0	0	0	0	0	0	0	0	0	0	0	0	0	0	0	0	0	0	0	0	0
NC_007530	1252663	CCATCAAATT.CGTGTTCATA	C	T	40	PASS	NA	GT	0	0	0	0	0	0	0	0	1	0	0	0	0	0	0	0	0	0	0	0	0	0	0	0	0	0	0	0	0	0	0	0	0	0	0	0	0	0	0	0	0
NC_007530	1254164	TGCTCAGTTA.CAACATTTTC	C	A	40	PASS	NA	GT	0	0	0	0	0	0	0	0	0	0	0	0	0	0	0	0	0	0	0	0	0	0	0	0	0	0	0	0	0	0	0	0	0	0	0	0	0	0	0	0	0
NC_007530	1254326	ATATTTTGAA.TCTTTACGTT	T	C	40	PASS	NA	GT	0	1	1	1	1	1	1	1	1	1	1	1	1	1	1	1	1	1	1	1	1	1	1	1	1	1	1	1	1	1	1	1	1	1	1	1	1	1	1	1	1
NC_007530	1255978	AACAGGTTCA.CAAGCGCGGC	C	T	40	PASS	NA	GT	0	0	1	0	0	0	0	0	0	0	0	0	0	0	0	0	0	0	0	0	0	0	0	0	0	0	0	0	0	0	0	0	0	0	0	0	0	0	0	0	0
NC_007530	1256890	AACTCAAGTG.TCGCTGGAAT	T	A	40	PASS	NA	GT	0	0	0	0	0	0	0	0	1	0	0	0	0	0	0	0	0	0	0	0	0	0	0	0	0	0	0	0	0	0	0	0	0	0	0	0	0	0	0	0	0
NC_007530	1256991	TTCAGGCATA.GGGACAAGTT	G	A	40	PASS	NA	GT	0	0	0	0	0	0	0	0	1	0	0	0	0	0	0	0	0	0	0	0	0	0	0	0	0	0	0	0	0	0	0	0	0	0	0	0	0	0	0	0	0
NC_007530	1260681	GGTTGACAGT.AGTATGTGCA	A	G	40	PASS	NA	GT	0	0	0	0	0	0	0	0	1	0	0	0	0	0	0	0	0	0	0	0	0	0	0	0	0	0	0	0	0	0	0	0	0	0	0	0	0	0	0	0	0
NC_007530	1261618	TGTGCTAGAT.ACGTATGAGA	A	G	40	PASS	NA	GT	0	0	0	0	0	0	0	0	0	1	0	0	0	0	0	0	0	0	0	0	0	0	0	0	0	0	0	0	0	0	0	0	0	0	0	0	0	0	0	0	0
NC_007530	1262530	AAGAAAGAAG.ATATTTTGAA	A	C	40	PASS	NA	GT	0	0	0	0	0	0	0	0	0	0	0	0	0	0	0	1	0	0	0	0	0	0	0	0	0	0	0	0	0	0	0	0	0	0	0	0	0	0	0	0	0
NC_007530	1262811	TTTATATGGT.GAACAAACAA	G	T	40	PASS	NA	GT	0	0	1	0	0	0	0	0	0	0	0	0	0	0	0	0	0	0	0	0	0	0	0	0	0	0	0	0	0	0	0	0	0	0	0	0	0	0	0	0	0
NC_007530	1264128	GTACTTTGCG.AAAACGAAAG	A	T	40	PASS	NA	GT	0	0	0	0	0	0	0	0	0	1	0	0	0	0	0	0	0	0	0	0	0	0	0	0	0	0	0	0	0	0	0	0	0	0	0	0	0	0	0	0	0
NC_007530	1264129	TACTTTGCGA.AAACGAAAGA	A	C	40	PASS	NA	GT	0	0	0	0	0	0	0	0	0	1	0	0	0	0	0	0	0	0	0	0	0	0	0	0	0	0	0	0	0	0	0	0	0	0	0	0	0	0	0	0	0
NC_007530	1264916	TTTTAGGTGG.ATATGATGAT	A	G	40	PASS	NA	GT	0	0	0	0	0	0	0	0	1	0	0	0	0	0	0	0	0	0	0	0	0	0	0	0	0	0	0	0	0	0	0	0	0	0	0	0	0	0	0	0	0
NC_007530	1266452	TTTCAGTTAC.AGATTACATA	A	G	40	PASS	NA	GT	0	0	0	0	0	0	0	0	0	0	0	0	0	0	0	0	0	0	0	0	0	0	0	0	0	0	0	0	0	0	0	0	0	0	0	0	0	0	0	0	0
NC_007530	1266616	TATCCAGAAG.GGCTTGGTGG	G	T	40	PASS	NA	GT	0	0	0	0	0	0	0	0	1	0	0	0	0	0	0	0	0	0	0	0	0	0	0	0	0	0	0	0	0	0	0	0	0	0	0	0	0	0	0	0	0
NC_007530	1266725	TTTGTTTCTT.TGGAGCTGGT	T	A	40	PASS	NA	GT	0	0	0	0	0	0	0	0	1	0	0	0	0	0	0	0	0	0	0	0	0	0	0	0	0	0	0	0	0	0	0	0	0	0	0	0	0	0	0	0	0
NC_007530	1267270	CACGTCAGGT.ACTTTCTTTG	A	T	40	PASS	NA	GT	0	0	0	0	0	0	0	0	1	0	0	0	0	0	0	0	0	0	0	0	0	0	0	0	0	0	0	0	0	0	0	0	0	0	0	0	0	0	0	0	0
NC_007530	1267486	CATGATCATT.ATTTTTGCTG	A	C	40	PASS	NA	GT	0	0	0	0	0	0	0	0	0	1	0	0	0	0	0	0	0	0	0	0	0	0	0	0	0	0	0	0	0	0	0	0	0	0	0	0	0	0	0	0	0
NC_007530	1269237	TCTACGTAAT.GACGACTTTG	G	C	40	PASS	NA	GT	0	0	0	0	0	0	0	0	1	0	0	0	0	0	0	0	0	0	0	0	0	0	0	0	0	0	0	0	0	0	0	0	0	0	0	0	0	0	0	0	0
NC_007530	1269975	AGAAGAGAGC.ATAAGTTTTG	A	G	40	PASS	NA	GT	0	0	0	0	0	0	0	0	1	0	0	0	0	0	0	0	0	0	0	0	0	0	0	0	0	0	0	0	0	0	0	0	0	0	0	0	0	0	0	0	0
NC_007530	1270013	TAAAATTTTT.CTTTTTCTTT	C	T	40	PASS	NA	GT	0	0	0	0	0	0	0	0	0	0	0	0	0	0	0	0	0	0	0	0	0	0	0	0	0	0	0	0	0	0	0	0	0	0	0	0	0	0	0	0	0
NC_007530	1270238	TCAAAGTAGC.GATACATTCA	G	A	40	PASS	NA	GT	0	0	0	0	0	0	0	0	0	0	0	0	0	0	0	0	0	0	0	0	0	0	0	0	0	0	0	0	0	0	0	0	0	0	0	0	0	0	0	0	0
NC_007530	1270338	TAAAATTCGG.TTTTGAAGAC	T	C	40	PASS	NA	GT	0	0	0	0	0	0	0	0	0	0	0	0	0	0	0	0	0	0	0	0	0	0	0	0	0	0	0	0	0	0	0	0	0	0	0	0	0	0	0	0	0
NC_007530	1270538	ATGAAATAGA.CGTCGTTGTA	C	A	40	PASS	NA	GT	0	0	0	0	0	0	0	0	0	1	0	0	0	0	0	0	0	0	0	0	0	0	0	0	0	0	0	0	0	0	0	0	0	0	0	0	0	0	0	0	0
NC_007530	1270727	TAGAAAGAGG.CAGAGAATAT	C	T	40	PASS	NA	GT	0	0	0	0	0	0	0	0	0	0	0	0	0	0	0	0	0	0	0	0	0	0	0	0	0	0	0	0	0	0	0	0	0	0	0	0	0	0	0	1	1
NC_007530	1273583	AAGAGGGAGC.AAAAGTTGTT	A	T	40	PASS	NA	GT	0	0	0	0	0	0	0	0	0	1	0	0	0	0	0	0	0	0	0	0	0	0	0	0	0	0	0	0	0	0	0	0	0	0	0	0	0	0	0	0	0
NC_007530	1273584	AGAGGGAGCA.AAAGTTGTTA	A	T	40	PASS	NA	GT	0	0	0	0	0	0	0	0	0	1	0	0	0	0	0	0	0	0	0	0	0	0	0	0	0	0	0	0	0	0	0	0	0	0	0	0	0	0	0	0	0
NC_007530	1274428	ACGTGAACCA.GAGCCGCAAG	G	A	40	PASS	NA	GT	0	0	0	0	0	0	0	0	0	0	0	0	0	0	0	0	0	0	0	0	0	0	1	0	0	0	0	0	0	0	1	0	0	0	0	0	0	0	0	0	0
NC_007530	1274485	TAAGACGAAG.CTTTATCGCT	C	T	40	PASS	NA	GT	0	0	0	0	0	1	0	0	0	0	0	0	0	0	0	0	0	0	0	0	0	0	0	0	0	0	0	0	0	0	0	0	0	0	0	0	0	0	0	0	0
NC_007530	1275883	TTATATTATG.CAAGTAAAAG	C	T	40	PASS	NA	GT	0	0	0	0	0	0	0	0	0	0	0	0	0	0	0	0	0	0	0	0	0	0	0	0	0	0	0	0	0	0	0	0	0	0	0	0	0	0	0	0	0
NC_007530	1275941	TACAGAAATA.TGGACTTCCT	T	G	40	PASS	NA	GT	0	0	0	0	0	0	0	0	0	0	0	0	0	0	0	0	0	0	0	0	0	0	0	0	0	0	0	0	0	0	0	0	0	0	0	0	0	0	0	0	0
NC_007530	1277576	CGCTACAATG.GATATACTTG	G	T	40	PASS	NA	GT	0	0	0	0	0	0	0	0	0	1	0	0	0	0	0	0	0	0	0	0	0	0	0	0	0	0	0	0	0	0	0	0	0	0	0	0	0	0	0	0	0
NC_007530	1278130	ATTGCGGATG.CATAAAAGCT	C	A	40	PASS	NA	GT	0	0	0	0	0	0	0	0	0	0	0	0	0	0	0	0	0	0	0	0	0	0	0	0	0	0	0	0	0	0	0	0	0	0	0	0	0	0	0	0	0
NC_007530	1280307	CGGAATGGTA.TTTCAATCAT	T	G	40	PASS	NA	GT	0	0	0	0	0	0	0	0	1	0	0	0	0	0	0	0	0	0	0	0	0	0	0	0	0	0	0	0	0	0	0	0	0	0	0	0	0	0	0	0	0
NC_007530	1280308	GGAATGGTAT.TTCAATCATA	T	A	40	PASS	NA	GT	0	0	0	0	0	0	0	0	1	0	0	0	0	0	0	0	0	0	0	0	0	0	0	0	0	0	0	0	0	0	0	0	0	0	0	0	0	0	0	0	0
NC_007530	1280335	TTTCCGAATT.TAACAGCACT	T	A	40	PASS	NA	GT	0	0	0	0	0	0	0	0	1	0	0	0	0	0	0	0	0	0	0	0	0	0	0	0	0	0	0	0	0	0	0	0	0	0	0	0	0	0	0	0	0
NC_007530	1281139	AAAGAAGAGT.GGATACAAAG	G	T	40	PASS	NA	GT	0	0	1	0	0	0	0	0	0	0	0	0	0	0	0	0	0	0	0	0	0	0	0	0	0	0	0	0	0	0	0	0	0	0	0	0	0	0	0	0	0
NC_007530	1281268	GCGAATTTCA.GTAAATATTT	G	T	40	PASS	NA	GT	0	0	1	0	0	0	0	0	0	0	0	0	0	0	0	0	0	0	0	0	0	0	0	0	0	0	0	0	0	0	0	0	0	0	0	0	0	0	0	0	0
NC_007530	1281285	TTTCACAACA.CCAACGCTAG	C	A	40	PASS	NA	GT	0	0	0	0	0	0	0	0	1	0	0	0	0	0	0	0	0	0	0	0	0	0	0	0	0	0	0	0	0	0	0	0	0	0	0	0	0	0	0	0	0
NC_007530	1317163	TGCATAACGT.GAAAAGGCAG	G	C	40	PASS	NA	GT	0	0	0	0	0	0	0	0	0	1	0	0	0	0	0	0	0	0	0	0	0	0	0	0	0	0	0	0	0	0	0	0	0	0	0	0	0	0	0	0	0
NC_007530	1317236	ATGATTTCAT.ATTGAATGTG	A	T	40	PASS	NA	GT	0	0	0	0	0	0	0	0	1	0	0	0	0	0	0	0	0	0	0	0	0	0	0	0	0	0	0	0	0	0	0	0	0	0	0	0	0	0	0	0	0
NC_007530	1317771	TTGGAGCAGG.CTATATGAGC	C	A	40	PASS	NA	GT	0	0	1	0	0	0	0	0	0	0	0	0	0	0	0	0	0	0	0	0	0	0	0	0	0	0	0	0	0	0	0	0	0	0	0	0	0	0	0	0	0
NC_007530	1320673	TGATACCAAT.TACGAACGCA	T	C	40	PASS	NA	GT	0	0	0	0	0	0	0	0	1	0	0	0	0	0	0	0	0	0	0	0	0	0	0	0	0	0	0	0	0	0	0	0	0	0	0	0	0	0	0	0	0
NC_007530	1321031	CATTTGTACA.GCTCTAAATG	G	T	40	PASS	NA	GT	0	0	1	0	0	0	0	0	0	0	0	0	0	0	0	0	0	0	0	0	0	0	0	0	0	0	0	0	0	0	0	0	0	0	0	0	0	0	0	0	0
NC_007530	1321329	AATCCAGCTA.TGATAGTAGG	T	G	40	PASS	NA	GT	0	0	0	0	0	0	0	0	0	0	0	0	0	0	0	0	0	0	0	0	0	0	0	0	0	0	0	0	0	0	0	0	0	0	0	0	0	0	0	0	0
NC_007530	1321699	ATGCAGCTTA.ATTTGGAAAT	A	C	40	PASS	NA	GT	0	0	0	0	0	0	0	0	1	0	0	0	0	0	0	0	0	0	0	0	0	0	0	0	0	0	0	0	0	0	0	0	0	0	0	0	0	0	0	0	0
NC_007530	1321703	AGCTTAATTT.GGAAATCAAG	G	T	40	PASS	NA	GT	0	0	0	0	0	0	0	0	1	0	0	0	0	0	0	0	0	0	0	0	0	0	0	0	0	0	0	0	0	0	0	0	0	0	0	0	0	0	0	0	0
NC_007530	1324327	AGTAGAAGAA.AGTGCAATAC	A	G	40	PASS	NA	GT	0	0	0	0	0	0	0	0	1	0	0	0	0	0	0	0	0	0	0	0	0	0	0	0	0	0	0	0	0	0	0	0	0	0	0	0	0	0	0	0	0
NC_007530	1324371	TGAAGCTTGA.ACCTTCTATG	A	G	40	PASS	NA	GT	0	0	0	0	0	0	0	0	1	0	0	0	0	0	0	0	0	0	0	0	0	0	0	0	0	0	0	0	0	0	0	0	0	0	0	0	0	0	0	0	0
NC_007530	1325045	TGATTCGTGA.AACAGAAAAT	A	C	40	PASS	NA	GT	0	0	0	0	0	0	0	0	0	1	0	0	0	0	0	0	0	0	0	0	0	0	0	0	0	0	0	0	0	0	0	0	0	0	0	0	0	0	0	0	0
NC_007530	1325159	GTGACCTTCC.TGATGATTTC	T	C	40	PASS	NA	GT	0	0	0	0	0	0	0	0	1	0	0	0	0	0	0	0	0	0	0	0	0	0	0	0	0	0	0	0	0	0	0	0	0	0	0	0	0	0	0	0	0
NC_007530	1325233	GTATTCGGAT.CATGTGATTC	C	A	40	PASS	NA	GT	0	0	1	0	0	0	0	0	0	0	0	0	0	0	0	0	0	0	0	0	0	0	0	0	0	0	0	0	0	0	0	0	0	0	0	0	0	0	0	0	0
NC_007530	1325279	TTGACATTTT.AATAGAAAAG	A	T	40	PASS	NA	GT	0	0	0	0	0	0	0	0	0	0	0	0	0	1	0	0	0	0	0	0	0	0	0	0	0	0	0	0	0	0	0	0	0	0	0	0	0	0	0	0	0
NC_007530	1325303	AAGAACGCGG.TGCAGCAGTT	T	G	40	PASS	NA	GT	0	0	0	0	0	0	0	0	0	0	0	0	0	1	0	0	0	0	0	0	0	0	0	0	0	0	0	0	0	0	0	0	0	0	0	0	0	0	0	0	0
NC_007530	1325787	ATTTTTATAT.GAAAAATTTC	G	A	40	PASS	NA	GT	0	1	0	0	0	0	0	1	0	0	1	1	1	1	0	0	0	0	0	0	0	0	0	0	0	0	0	0	0	0	0	0	0	0	0	0	0	1	0	0	0
NC_007530	1326257	AAGCTTTTCA.TCATTTACCG	T	G	40	PASS	NA	GT	0	0	0	0	0	0	0	0	0	0	0	0	0	0	0	0	0	0	0	0	0	0	0	0	0	0	0	0	0	0	0	0	0	0	0	0	0	0	0	0	0
NC_007530	1327390	CCTCGTTTCT.GATTTAAGTT	G	C	40	PASS	NA	GT	0	0	0	0	0	0	0	0	1	0	0	0	0	0	0	0	0	0	0	0	0	0	0	0	0	0	0	0	0	0	0	0	0	0	0	0	0	0	0	0	0
NC_007530	1327391	CTCGTTTCTG.ATTTAAGTTA	A	C	40	PASS	NA	GT	0	0	0	0	0	0	0	0	1	0	0	0	0	0	0	0	0	0	0	0	0	0	0	0	0	0	0	0	0	0	0	0	0	0	0	0	0	0	0	0	0
NC_007530	1327564	TAGCTATAAA.CCAATTGATC	C	T	40	PASS	NA	GT	0	0	0	0	0	0	0	0	0	0	0	0	0	0	0	0	0	0	0	0	0	0	0	1	0	0	0	0	0	0	0	0	0	0	0	0	0	0	0	0	0
NC_007530	1328886	CGTTATTATA.TCGTTTCGCT	T	G	40	PASS	NA	GT	0	0	0	0	0	0	0	0	0	1	0	0	0	0	0	0	0	0	0	0	0	0	0	0	0	0	0	0	0	0	0	0	0	0	0	0	0	0	0	0	0
NC_007530	1329352	TCCTAATGCA.TCAATAAATC	T	A	40	PASS	NA	GT	0	0	0	0	0	0	0	0	1	0	0	0	0	0	0	0	0	0	0	0	0	0	0	0	0	0	0	0	0	0	0	0	0	0	0	0	0	0	0	0	0
NC_007530	1330393	AGTTTTCGAA.ACCAAGTACA	A	G	40	PASS	NA	GT	0	0	0	0	0	0	0	0	1	0	0	0	0	0	0	0	0	0	0	0	0	0	0	0	0	0	0	0	0	0	0	0	0	0	0	0	0	0	0	0	0
NC_007530	1330582	CAATGATGGT.AGCTGCAAGT	A	G	40	PASS	NA	GT	0	0	0	0	0	0	0	0	1	0	0	0	0	0	0	0	0	0	0	0	0	0	0	0	0	0	0	0	0	0	0	0	0	0	0	0	0	0	0	0	0
NC_007530	1330808	CTGCCGGGTT.CGGCAGTTTT	C	T	40	PASS	NA	GT	0	0	0	0	0	0	0	0	0	0	0	0	0	0	0	0	0	0	0	0	0	0	0	0	0	0	0	0	0	0	0	0	0	0	0	0	0	0	0	0	0
NC_007530	1332494	TGAAAGAGGA.GACCTTCCTT	G	A	40	PASS	NA	GT	0	0	0	0	0	0	0	0	0	0	0	0	0	0	0	0	0	0	0	0	0	0	0	0	0	0	0	0	0	0	0	0	0	0	0	0	0	0	0	0	0
NC_007530	1333301	AAGCCGCCAT.ATACGAAGAC	A	G	40	PASS	NA	GT	0	0	0	0	0	0	0	0	0	1	0	0	0	0	0	0	0	0	0	0	0	0	0	0	0	0	0	0	0	0	0	0	0	0	0	0	0	0	0	0	0
NC_007530	1333611	GTACGATATT.TAGCAATGTA	T	A	40	PASS	NA	GT	0	0	0	0	0	0	0	0	0	1	0	0	0	0	0	0	0	0	0	0	0	0	0	0	0	0	0	0	0	0	0	0	0	0	0	0	0	0	0	0	0
NC_007530	1335749	GCTCTATGGC.CGGATAATTT	C	T	40	PASS	NA	GT	0	0	0	0	0	0	0	0	0	0	0	0	0	0	0	0	0	0	0	0	0	0	0	0	0	0	0	0	0	0	0	0	0	0	0	0	0	0	0	0	0
NC_007530	1338285	CTGCAATCCC.CATCATATTG	C	T	40	PASS	NA	GT	0	0	0	0	0	0	0	0	0	0	0	0	0	0	0	0	0	0	0	0	0	0	0	0	0	0	0	0	0	0	0	0	0	0	0	0	0	0	0	0	0
NC_007530	1338955	ATAAAAACGG.ACGTCCGTTT	A	G	40	PASS	NA	GT	0	0	0	0	0	0	0	0	0	0	0	0	0	0	0	0	0	0	0	0	0	0	0	0	0	0	0	0	0	0	0	0	0	0	0	0	0	0	0	0	0
NC_007530	1339904	GTTAGAGAAG.AGTTATTTAC	A	G	40	PASS	NA	GT	0	0	0	0	0	0	0	0	1	0	0	0	0	0	0	0	0	0	0	0	0	0	0	0	0	0	0	0	0	0	0	0	0	0	0	0	0	0	0	0	0
NC_007530	1340476	GCTATTGTTA.GAAGCGCTAG	G	C	40	PASS	NA	GT	0	0	0	0	0	0	0	0	1	0	0	0	0	0	0	0	0	0	0	0	0	0	0	0	0	0	0	0	0	0	0	0	0	0	0	0	0	0	0	0	0
NC_007530	1341727	AATTGCAAAG.CCTGATGAAC	C	A	40	PASS	NA	GT	0	0	0	0	0	0	0	0	1	0	0	0	0	0	0	0	0	0	0	0	0	0	0	0	0	0	0	0	0	0	0	0	0	0	0	0	0	0	0	0	0
NC_007530	1341728	ATTGCAAAGC.CTGATGAACT	C	T	40	PASS	NA	GT	0	0	0	0	0	0	0	0	1	0	0	0	0	0	0	0	0	0	0	0	0	0	0	0	0	0	0	0	0	0	0	0	0	0	0	0	0	0	0	0	0
NC_007530	1342006	ATTGCAGCAT.GCAATTGAAT	G	A	40	PASS	NA	GT	0	0	0	0	0	0	0	0	1	0	0	0	0	0	0	0	0	0	0	0	0	0	0	0	0	0	0	0	0	0	0	0	0	0	0	0	0	0	0	0	0
NC_007530	1342477	GGGAAGGATT.CCATAGTTGT	C	T	40	PASS	NA	GT	0	0	0	0	0	0	0	0	0	0	0	0	0	0	0	0	0	0	0	0	0	0	0	0	0	0	0	0	0	0	0	0	0	0	0	0	0	0	0	0	0
NC_007530	1343218	AAGAAGAAAC.GGAAACAGAT	G	C	40	PASS	NA	GT	0	0	0	0	0	0	0	0	1	0	0	0	0	0	0	0	0	0	0	0	0	0	0	0	0	0	0	0	0	0	0	0	0	0	0	0	0	0	0	0	0
NC_007530	1343309	TGATGCCGGA.TATCAGCCGG	T	C	40	PASS	NA	GT	0	0	0	0	0	0	0	0	1	0	0	0	0	0	0	0	0	0	0	0	0	0	0	0	0	0	0	0	0	0	0	0	0	0	0	0	0	0	0	0	0
NC_007530	1343641	CTTTCGTACA.GCCGCGAGTA	G	T	40	PASS	NA	GT	0	0	0	0	0	0	0	0	0	1	0	0	0	0	0	0	0	0	0	0	0	0	0	0	0	0	0	0	0	0	0	0	0	0	0	0	0	0	0	0	0
NC_007530	1345423	ATTTAACGGG.GCAACCATTA	G	A	40	PASS	NA	GT	0	0	0	0	0	0	0	0	0	0	0	0	0	0	0	0	0	0	0	0	0	0	0	0	0	0	0	0	0	0	0	0	0	0	0	0	0	0	0	0	0
NC_007530	1345521	GCGAAAGAAA.GGCCAGAGAA	G	A	40	PASS	NA	GT	0	0	0	0	0	0	0	0	0	0	0	0	0	0	1	1	0	0	0	0	0	0	0	0	0	0	0	0	0	0	0	0	0	0	0	0	0	0	0	0	0
NC_007530	1348352	GTAAAAATTA.GAGGAGAAAG	G	T	40	PASS	NA	GT	0	0	0	0	0	0	0	0	0	1	0	0	0	0	0	0	0	0	0	0	0	0	0	0	0	0	0	0	0	0	0	0	0	0	0	0	0	0	0	0	0
NC_007530	1348508	AGCCTTGTAG.GTATATTTTA	G	A	40	PASS	NA	GT	0	0	0	0	0	0	0	0	1	1	0	0	0	0	0	0	0	0	1	0	0	0	0	0	0	0	0	0	0	0	0	0	0	0	0	0	0	0	0	0	0
NC_007530	1349001	TAATGTAAGA.GCTGAAATTG	G	A	40	PASS	NA	GT	0	0	1	0	0	0	0	0	0	0	0	0	0	0	0	0	0	0	0	0	0	0	0	0	0	0	0	0	0	0	0	0	0	0	0	0	0	0	0	0	0
NC_007530	1349292	AGCAGAAAAA.CTCGCCTCAA	C	G	40	PASS	NA	GT	0	0	0	0	0	0	0	0	1	0	0	0	0	0	0	0	0	0	0	0	0	0	0	0	0	0	0	0	0	0	0	0	0	0	0	0	0	0	0	0	0
NC_007530	1350122	GTGTAAGTTT.TGTGTCGCTT	T	G	40	PASS	NA	GT	0	0	0	0	0	0	0	0	1	0	0	0	0	0	0	0	0	0	0	0	0	0	0	0	0	0	0	0	0	0	0	0	0	0	0	0	0	0	0	0	0
NC_007530	1351788	GTCTAGTCAA.ATACGTGAGA	A	G	40	PASS	NA	GT	0	0	0	0	0	0	0	0	0	0	0	0	0	0	0	0	0	0	0	0	0	0	0	0	0	0	0	0	0	0	0	0	0	0	0	0	0	0	0	0	0
NC_007530	1351849	GGAAAGAACG.TTTCTGTACA	T	C	40	PASS	NA	GT	0	1	0	0	0	0	0	1	0	0	1	1	1	1	0	0	0	0	0	0	0	0	0	0	0	0	0	0	0	0	0	0	0	0	0	0	0	1	0	0	0
NC_007530	1352298	GCTTAGAGAA.GCAGTCGAAA	G	C	40	PASS	NA	GT	0	0	0	0	0	0	0	0	1	0	0	0	0	0	0	0	0	0	0	0	0	0	0	0	0	0	0	0	0	0	0	0	0	0	0	0	0	0	0	0	0
NC_007530	1352945	ATTTTAAAGG.GGTGGTAGAA	G	A	40	PASS	NA	GT	0	1	1	1	1	1	1	1	1	1	1	1	1	1	1	1	1	1	1	1	1	1	1	1	1	1	1	1	1	1	1	1	1	1	1	1	1	1	1	1	1
NC_007530	1353591	AATGATATGA.ACATATACGG	A	G	40	PASS	NA	GT	0	0	0	0	0	0	0	0	0	0	0	0	0	0	0	0	0	0	0	0	0	0	0	0	0	0	0	0	0	0	0	0	0	0	0	0	0	0	0	0	0
NC_007530	1354687	GGACCTGCTT.GCCATACGGG	G	T	40	PASS	NA	GT	0	0	0	0	0	0	0	0	0	1	0	0	0	0	0	0	0	0	0	0	0	0	0	0	0	0	0	0	0	0	0	0	0	0	0	0	0	0	0	0	0
NC_007530	1354828	TTACTTGTTT.TCAAAAGGAG	T	A	40	PASS	NA	GT	0	0	0	0	0	0	0	0	1	0	0	0	0	0	0	0	0	0	0	0	0	0	0	0	0	0	0	0	0	0	0	0	0	0	0	0	0	0	0	0	0
NC_007530	1355104	ATTCATTTAG.AAGAAGGACC	A	C	40	PASS	NA	GT	0	0	0	0	0	0	0	0	0	1	0	0	0	0	0	0	0	0	0	0	0	0	0	0	0	0	0	0	0	0	0	0	0	0	0	0	0	0	0	0	0
NC_007530	1355190	AAAACATTCT.ATGGAGTGGC	A	C	40	PASS	NA	GT	0	0	0	0	0	0	0	0	0	1	0	0	0	0	0	0	0	0	0	0	0	0	0	0	0	0	0	0	0	0	0	0	0	0	0	0	0	0	0	0	0
NC_007530	1356374	AAAAGTGTCG.ATTTTTAAAA	A	G	40	PASS	NA	GT	0	0	0	0	0	0	0	0	1	0	0	0	0	0	0	0	0	0	0	0	0	0	0	0	0	0	0	0	0	0	0	0	0	0	0	0	0	0	0	0	0
NC_007530	1357458	AGAAACCTTC.CAGTTCCGGA	C	N	40	N:ALN	NA	GT	0	0	0	0	0	0	0	0	0	0	0	0	0	0	0	0	0	0	0	0	0	0	0	0	0	0	0	0	0	0	0	0	0	0	0	0	0	0	0	0	0
NC_007530	1357459	GAAACCTTCC.AGTTCCGGAA	A	N	40	N:ALN	NA	GT	0	0	0	0	0	0	0	0	0	0	0	0	0	0	0	0	0	0	0	0	0	0	0	0	0	0	0	0	0	0	0	0	0	0	0	0	0	0	0	0	0
NC_007530	1357460	AAACCTTCCA.GTTCCGGAAG	G	N	40	N:ALN	NA	GT	0	0	0	0	0	0	0	0	0	0	0	0	0	0	0	0	0	0	0	0	0	0	0	0	0	0	0	0	0	0	0	0	0	0	0	0	0	0	0	0	0
NC_007530	1357461	AACCTTCCAG.TTCCGGAAGG	T	N	40	N:ALN	NA	GT	0	0	0	0	0	0	0	0	0	0	0	0	0	0	0	0	0	0	0	0	0	0	0	0	0	0	0	0	0	0	0	0	0	0	0	0	0	0	0	0	0
NC_007530	1357462	ACCTTCCAGT.TCCGGAAGGT	T	N	40	N:ALN	NA	GT	0	0	0	0	0	0	0	0	0	0	0	0	0	0	0	0	0	0	0	0	0	0	0	0	0	0	0	0	0	0	0	0	0	0	0	0	0	0	0	0	0
NC_007530	1357463	CCTTCCAGTT.CCGGAAGGTT	C	N	40	N:ALN	NA	GT	0	0	0	0	0	0	0	0	0	0	0	0	0	0	0	0	0	0	0	0	0	0	0	0	0	0	0	0	0	0	0	0	0	0	0	0	0	0	0	0	0
NC_007530	1357464	CTTCCAGTTC.CGGAAGGTTT	C	N	40	N:ALN	NA	GT	0	0	0	0	0	0	0	0	0	0	0	0	0	0	0	0	0	0	0	0	0	0	0	0	0	0	0	0	0	0	0	0	0	0	0	0	0	0	0	0	0
NC_007530	1357465	TTCCAGTTCC.GGAAGGTTTC	G	N	40	N:ALN	NA	GT	0	0	0	0	0	0	0	0	0	0	0	0	0	0	0	0	0	0	0	0	0	0	0	0	0	0	0	0	0	0	0	0	0	0	0	0	0	0	0	0	0
NC_007530	1357498	TTATTTGCTC.TTTTTGATGG	T	C	40	PASS	NA	GT	0	0	0	0	0	0	0	0	1	0	0	0	0	0	0	0	0	0	0	0	0	0	0	0	0	0	0	0	0	0	0	0	0	0	0	0	0	0	0	0	0
NC_007530	1358236	AAGTTTACTT.ATTTTATCAT	A	G	40	PASS	NA	GT	0	0	0	0	0	0	0	0	1	0	0	0	0	0	0	0	0	0	0	0	0	0	0	0	0	0	0	0	0	0	0	0	0	0	0	0	0	0	0	0	0
NC_007530	1358961	GGTTTACAAC.GCCACTTTCC	G	A	40	PASS	NA	GT	0	0	0	0	0	0	0	0	0	0	0	0	0	0	0	0	0	0	0	0	0	0	0	0	0	0	0	0	0	0	0	0	0	0	0	0	0	0	0	0	0
NC_007530	1359505	CATTGAAATC.AAAATGACAT	A	T	40	PASS	NA	GT	0	0	0	0	0	0	0	0	0	0	0	0	0	1	0	0	0	0	0	0	0	0	0	0	0	0	0	0	0	0	0	0	0	0	0	0	0	0	0	0	0
NC_007530	1360567	CGAGTGTGTC.GGTAGCTCAA	G	A	40	PASS	NA	GT	0	0	0	0	0	0	0	0	0	1	0	0	0	0	0	0	0	0	0	0	0	0	0	0	0	0	0	0	0	0	0	0	0	0	0	0	0	0	0	0	0
NC_007530	1362272	AGTCGGATCT.GTGAAAGACA	G	A	40	PASS	NA	GT	0	0	0	0	0	1	0	0	0	0	0	0	0	0	0	0	0	0	0	0	0	0	0	0	0	0	0	0	0	0	0	0	0	0	0	0	0	0	0	0	0
NC_007530	1362500	ACTAGCGATT.TCTTGTACAG	T	A	40	PASS	NA	GT	0	0	0	0	0	0	0	0	0	1	0	0	0	0	0	0	0	0	0	0	0	0	0	0	0	0	0	0	0	0	0	0	0	0	0	0	0	0	0	0	0
NC_007530	1362699	GGGCAATTCC.TTTTTTGTAA	T	C	40	PASS	NA	GT	0	0	0	0	0	0	0	0	0	0	0	0	0	0	0	0	0	0	0	0	0	0	0	0	0	0	0	0	0	0	0	0	0	0	0	0	0	0	0	0	0
NC_007530	1363719	ATATGTATAC.AAGCATAGCT	A	G	40	PASS	NA	GT	0	0	0	0	0	0	0	0	0	0	0	0	0	0	0	0	0	0	0	0	0	0	0	0	0	0	0	0	0	0	0	0	0	0	1	1	0	0	0	0	0
NC_007530	1364283	AAAACGACGG.ATGAGGCTCA	A	T	40	PASS	NA	GT	0	0	0	0	0	0	0	0	0	1	0	0	0	0	0	0	0	0	0	0	0	0	0	0	0	0	0	0	0	0	0	0	0	0	0	0	0	0	0	0	0
NC_007530	1364284	AAACGACGGA.TGAGGCTCAT	T	G	40	PASS	NA	GT	0	0	0	0	0	0	0	0	0	1	0	0	0	0	0	0	0	0	0	0	0	0	0	0	0	0	0	0	0	0	0	0	0	0	0	0	0	0	0	0	0
NC_007530	1364686	CGAGGGAAGC.AATATTCCAT	A	G	40	PASS	NA	GT	0	0	0	0	0	0	0	0	0	0	0	0	0	0	0	0	0	0	0	0	0	0	0	0	0	0	0	0	0	0	0	0	0	0	0	0	0	0	0	0	0
NC_007530	1364963	ACGAAACGGT.GAGATTCCAC	G	T	40	PASS	NA	GT	0	0	1	0	0	0	0	0	0	0	0	0	0	0	0	0	0	0	0	0	0	0	0	0	0	0	0	0	0	0	0	0	0	0	0	0	0	0	0	0	0
NC_007530	1365413	TAGGGATCTA.TTAGCTGTAG	T	A	40	PASS	NA	GT	0	0	0	0	0	0	0	0	1	0	0	0	0	0	0	0	0	0	0	0	0	0	0	0	0	0	0	0	0	0	0	0	0	0	0	0	0	0	0	0	0
NC_007530	1367234	GTTGGTGTAG.AGACATTACA	A	G	40	PASS	NA	GT	0	1	0	0	0	0	0	1	0	0	1	1	1	1	0	0	0	0	0	0	0	0	0	0	0	0	0	0	0	0	0	0	0	0	0	0	0	1	0	0	0
NC_007530	1367310	GATTTATATC.GATTTGAAGC	G	T	40	PASS	NA	GT	0	0	0	0	0	0	0	0	0	0	0	0	0	0	0	0	0	0	0	0	0	0	0	0	0	0	0	0	0	0	0	0	0	0	0	0	0	0	0	0	0
NC_007530	1368105	TGGGGGTTAG.CAATTTACCC	C	A	40	PASS	NA	GT	0	0	0	0	0	0	0	0	0	1	0	0	0	0	0	0	0	0	0	0	0	0	0	0	0	0	0	0	0	0	0	0	0	0	0	0	0	0	0	0	0
NC_007530	1368291	GAGAAGTCGT.CCGTTTTAGA	C	A	40	PASS	NA	GT	0	0	1	0	0	0	0	0	0	0	0	0	0	0	0	0	0	0	0	0	0	0	0	0	0	0	0	0	0	0	0	0	0	0	0	0	0	0	0	0	0
NC_007530	1369001	ATATGAGCTA.GATGAGATAA	G	C	40	PASS	NA	GT	0	0	0	0	0	0	0	0	1	0	0	0	0	0	0	0	0	0	0	0	0	0	0	0	0	0	0	0	0	0	0	0	0	0	0	0	0	0	0	0	0
NC_007530	1369003	ATGAGCTAGA.TGAGATAAAA	T	G	40	PASS	NA	GT	0	0	0	0	0	0	0	0	1	0	0	0	0	0	0	0	0	0	0	0	0	0	0	0	0	0	0	0	0	0	0	0	0	0	0	0	0	0	0	0	0
NC_007530	1369672	AAAAGAGAAT.TGTTTTTACA	T	A	40	PASS	NA	GT	0	0	0	0	0	0	0	0	0	0	0	0	0	0	0	0	0	0	0	0	0	0	0	0	0	0	0	0	0	0	0	0	0	0	0	0	0	0	0	1	0
NC_007530	1370105	TTAATAAAAG.TTTAAATATT	T	C	40	PASS	NA	GT	0	0	0	0	0	0	0	0	0	0	0	0	0	0	0	0	0	0	0	0	0	0	1	0	0	0	0	0	0	0	1	0	0	0	0	0	0	0	0	0	0
NC_007530	1370227	GAAATTTCCA.TATGTTGCAG	T	A	40	PASS	NA	GT	0	0	0	0	0	0	0	0	0	0	0	0	0	0	0	0	0	0	0	0	0	0	0	0	0	0	0	0	0	0	0	0	0	0	0	0	0	0	0	0	0
NC_007530	1371138	AAGATAATGA.GAAAAAACGT	G	C	40	PASS	NA	GT	0	0	0	0	0	0	0	0	1	0	0	0	0	0	0	0	0	0	0	0	0	0	0	0	0	0	0	0	0	0	0	0	0	0	0	0	0	0	0	0	0
NC_007530	1371242	AAAATATTTG.GGAAGACATT	G	A	40	PASS	NA	GT	0	0	0	0	0	0	0	0	0	0	0	0	0	0	0	0	0	0	0	0	0	0	0	0	0	0	0	0	0	0	0	0	0	0	0	0	0	0	0	0	0
NC_007530	1371546	TTTAATGAGT.GATTATATGC	G	T	40	PASS	NA	GT	0	0	0	0	0	0	0	0	0	1	0	0	0	0	0	0	0	0	0	0	0	0	0	0	0	0	0	0	0	0	0	0	0	0	0	0	0	0	0	0	0
NC_007530	1371547	TTAATGAGTG.ATTATATGCT	A	T	40	PASS	NA	GT	0	0	0	0	0	0	0	0	0	1	0	0	0	0	0	0	0	0	0	0	0	0	0	0	0	0	0	0	0	0	0	0	0	0	0	0	0	0	0	0	0
NC_007530	1371735	AAACTCGGTA.TGCACCGAGT	T	C	40	PASS	NA	GT	0	0	0	0	0	0	0	0	0	1	0	0	0	0	0	0	0	0	0	0	0	0	0	0	0	0	0	0	0	0	0	0	0	0	0	0	0	0	0	0	0
NC_007530	1371736	AACTCGGTAT.GCACCGAGTT	G	A	40	PASS	NA	GT	0	0	0	0	0	0	0	0	0	1	0	0	0	0	0	0	0	0	0	0	0	0	0	0	0	0	0	0	0	0	0	0	0	0	0	0	0	0	0	0	0
NC_007530	1371737	ACTCGGTATG.CACCGAGTTT	C	G	40	PASS	NA	GT	0	0	0	0	0	0	0	0	0	1	0	0	0	0	0	0	0	0	0	0	0	0	0	0	0	0	0	0	0	0	0	0	0	0	0	0	0	0	0	0	0
NC_007530	1371738	CTCGGTATGC.ACCGAGTTTT	A	T	40	PASS	NA	GT	0	0	0	0	0	0	0	0	0	1	0	0	0	0	0	0	0	0	0	0	0	0	0	0	0	0	0	0	0	0	0	0	0	0	0	0	0	0	0	0	0
NC_007530	1371879	CAAGTTGTGT.TCCTTGTTTT	T	G	40	PASS	NA	GT	0	0	0	0	0	0	0	0	0	0	0	0	0	0	0	0	0	0	0	0	0	0	0	0	0	0	0	0	0	0	0	0	0	0	0	0	0	0	0	0	0
NC_007530	1373474	AGTGACACAT.CGAAGAGGGG	C	T	40	PASS	NA	GT	0	0	0	0	0	0	0	0	0	0	0	0	0	0	0	0	0	0	1	0	0	0	0	0	0	0	0	0	0	0	0	0	0	0	0	0	0	0	0	0	0
NC_007530	1374407	TTAACTTAGA.TGGATCAACT	T	C	40	PASS	NA	GT	0	0	0	0	0	0	0	0	0	0	0	0	0	0	0	0	0	0	0	0	0	0	0	0	0	0	0	0	0	0	0	0	0	0	0	0	0	0	0	0	0
NC_007530	1377055	GCGGCTTTTT.TTGTGCGATA	T	A	40	PASS	NA	GT	0	0	0	0	0	0	0	0	0	0	0	0	0	0	0	0	0	0	0	0	0	0	0	0	0	0	0	0	0	0	0	0	0	0	0	0	0	0	0	0	0
NC_007530	1377460	AGTAGTTTTA.TACTACGGAT	T	A	40	PASS	NA	GT	0	0	0	0	0	0	0	0	0	0	0	0	0	0	0	0	0	0	0	0	0	0	0	0	0	0	0	0	0	0	0	0	0	0	0	0	0	0	0	0	0
NC_007530	1379195	TGTCCTCAGT.TAGTATCGCA	T	C	40	PASS	NA	GT	0	0	0	0	0	0	0	0	1	0	0	0	0	0	0	0	0	0	0	0	0	0	0	0	0	0	0	0	0	0	0	0	0	0	0	0	0	0	0	0	0
NC_007530	1379196	GTCCTCAGTT.AGTATCGCAC	A	G	40	PASS	NA	GT	0	0	0	0	0	0	0	0	1	0	0	0	0	0	0	0	0	0	0	0	0	0	0	0	0	0	0	0	0	0	0	0	0	0	0	0	0	0	0	0	0
NC_007530	1381513	TATGCAGTAA.CGATAGTAGA	C	T	40	PASS	NA	GT	0	0	0	0	0	0	0	0	0	1	0	0	0	0	0	0	0	0	0	0	0	0	0	0	0	0	0	0	0	0	0	0	0	0	0	0	0	0	0	0	0
NC_007530	1381842	GTTGTACCGA.GCCAGCCAAG	G	T	40	PASS	NA	GT	0	0	1	0	0	0	0	0	0	0	0	0	0	0	0	0	0	0	0	0	0	0	0	0	0	0	0	0	0	0	0	0	0	0	0	0	0	0	0	0	0
NC_007530	1382641	CACAAAAAAC.TCGTCCCTAA	T	C	40	PASS	NA	GT	0	0	0	0	0	0	0	0	0	0	0	0	0	0	0	0	0	0	0	0	0	0	0	0	0	0	0	0	0	0	0	0	0	0	0	0	0	0	0	0	0
NC_007530	1382662	GAAAGGGACG.AGTTATATTT	A	C	40	PASS	NA	GT	0	0	0	0	0	0	0	0	0	0	0	0	0	0	0	0	0	0	0	0	0	0	0	0	0	0	0	0	0	0	0	0	0	0	0	0	0	0	0	0	0
NC_007530	1382663	AAAGGGACGA.GTTATATTTA	G	T	40	PASS	NA	GT	0	0	0	0	0	0	0	0	0	0	0	0	0	0	0	0	0	0	0	0	0	0	0	0	0	0	0	0	0	0	0	0	0	0	0	0	0	0	0	0	0
NC_007530	1383924	TATCATTAGG.ATATGGGGTA	A	G	40	PASS	NA	GT	0	0	0	0	1	0	0	0	0	0	0	0	0	0	0	0	0	0	0	0	0	0	0	0	0	0	0	0	0	0	0	0	0	0	0	0	0	0	0	0	0
NC_007530	1384918	AAAAAGTTCA.AAAATTAATT	A	T	40	PASS	NA	GT	0	0	0	0	0	0	0	0	0	0	0	0	0	0	0	0	0	0	0	0	0	0	0	0	0	0	0	0	0	0	0	0	0	0	0	0	0	0	0	0	0
NC_007530	1384983	GGATATAAAC.AGTATGAATT	A	G	40	PASS	NA	GT	0	0	0	0	0	0	0	0	0	0	0	0	0	0	0	0	0	0	0	0	0	0	0	0	0	1	0	0	0	0	0	0	0	0	0	0	0	0	0	0	0
NC_007530	1385238	TAGGAAATGA.TAATAGAGAG	T	A	40	PASS	NA	GT	0	0	0	0	0	0	0	0	0	0	0	0	0	0	0	0	0	0	0	0	0	0	0	0	0	0	0	0	0	0	0	0	0	0	0	0	0	0	0	0	0
NC_007530	1386193	GGATTTATTG.TTATTATCGG	T	C	40	PASS	NA	GT	0	0	0	0	0	0	0	0	1	0	0	0	0	0	0	0	0	0	0	0	0	0	0	0	0	0	0	0	0	0	0	0	0	0	0	0	0	0	0	0	0
NC_007530	1386468	GGATTACGTC.CCATATGAAG	C	T	40	PASS	NA	GT	0	0	0	0	0	0	0	0	1	0	0	0	0	0	0	0	0	0	0	0	0	0	0	0	0	0	0	0	0	0	0	0	0	0	0	0	0	0	0	0	0
NC_007530	1386925	CCCGCTGGGG.TAAGTACAAC	T	C	40	PASS	NA	GT	0	0	1	0	0	0	0	0	0	0	0	0	0	0	0	0	0	0	0	0	0	0	0	0	0	0	0	0	0	0	0	0	0	0	0	0	0	0	0	0	0
NC_007530	1387363	CATTCTAGTT.GGCTTATTTT	G	T	40	PASS	NA	GT	0	0	1	0	0	0	0	0	0	0	0	0	0	0	0	0	0	0	0	0	0	0	0	0	0	0	0	0	0	0	0	0	0	0	0	0	0	0	0	0	0
NC_007530	1388218	TACTTACATG.ATCATGTAAA	A	G	40	PASS	NA	GT	0	0	0	0	0	0	0	0	0	0	0	0	0	0	0	0	0	0	0	0	0	0	0	0	0	0	0	0	0	0	0	0	0	0	0	0	0	0	0	0	0
NC_007530	1388875	TAGTGTGAAC.CATTCTTGTA	C	A	40	PASS	NA	GT	0	0	1	0	0	0	0	0	0	0	0	0	0	0	0	0	0	0	0	0	0	0	0	0	0	0	0	0	0	0	0	0	0	0	0	0	0	0	0	0	0
NC_007530	1390733	GAAAAGTAAC.ATGATGTATT	A	C	40	PASS	NA	GT	0	0	0	0	0	0	0	0	0	1	0	0	0	0	0	0	0	0	0	0	0	0	0	0	0	0	0	0	0	0	0	0	0	0	0	0	0	0	0	0	0
NC_007530	1391599	TTGCTGCAAG.CAAAGCAGCT	C	T	40	PASS	NA	GT	0	0	0	0	0	0	0	0	0	0	0	0	0	0	0	0	0	0	0	0	0	0	0	0	0	0	1	0	0	0	0	0	0	0	0	0	0	0	0	0	0
NC_007530	1391913	ATACGTTTGC.AACGCTTTGG	A	C	40	PASS	NA	GT	0	0	0	0	0	0	0	0	1	0	0	0	0	0	0	0	0	0	0	0	0	0	0	0	0	0	0	0	0	0	0	0	0	0	0	0	0	0	0	0	0
NC_007530	1391914	TACGTTTGCA.ACGCTTTGGC	A	C	40	PASS	NA	GT	0	0	0	0	0	0	0	0	1	0	0	0	0	0	0	0	0	0	0	0	0	0	0	0	0	0	0	0	0	0	0	0	0	0	0	0	0	0	0	0	0
NC_007530	1391982	TGATCTTAAT.CGGATCTTTT	C	T	40	PASS	NA	GT	0	0	0	0	0	0	0	0	0	0	0	0	0	0	0	0	0	0	0	0	0	0	0	0	0	0	0	0	0	0	0	0	0	0	0	0	0	0	0	0	0
NC_007530	1392051	GTGATTCGTA.ATCCTTAATC	A	G	40	PASS	NA	GT	0	0	0	0	0	0	0	0	0	1	0	0	0	0	0	0	0	0	0	0	0	0	0	0	0	0	0	0	0	0	0	0	0	0	0	0	0	0	0	0	0
NC_007530	1393027	AAATTAGCTT.CTTCTAAAAC	C	A	40	PASS	NA	GT	0	0	1	0	0	0	0	0	0	0	0	0	0	0	0	0	0	0	0	0	0	0	0	0	0	0	0	0	0	0	0	0	0	0	0	0	0	0	0	0	0
NC_007530	1393822	GGTGTAGTTC.TTATGAATCC	T	A	40	PASS	NA	GT	0	0	0	0	0	0	0	0	1	0	0	0	0	0	0	0	0	0	0	0	0	0	0	0	0	0	0	0	0	0	0	0	0	0	0	0	0	0	0	0	0
NC_007530	1394427	AAAGGGAACA.GGCGAAAAGG	G	T	40	PASS	NA	GT	0	0	1	0	0	0	0	0	0	0	0	0	0	0	0	0	0	0	0	0	0	0	0	0	0	0	0	0	0	0	0	0	0	0	0	0	0	0	0	0	0
NC_007530	1396226	ATAGAATTTC.CAATTTGTTT	C	T	40	PASS	NA	GT	0	0	0	1	0	0	0	0	0	0	0	0	0	0	0	0	0	0	0	0	0	0	0	0	0	0	0	0	0	0	0	0	0	0	0	0	0	0	0	0	0
NC_007530	1396554	TCGTAATGGA.CAAACTACCA	C	T	40	LCB	NA	GT	0	0	0	0	0	0	0	0	0	0	0	0	0	0	0	0	0	0	0	0	0	0	1	0	0	0	0	0	0	0	0	0	0	0	0	0	0	0	0	0	0
NC_007530	1396888	ATATTCTTGA.ATCGCTGGTG	A	C	40	PASS	NA	GT	0	0	0	0	0	0	0	0	0	0	0	0	0	0	0	0	0	0	0	0	0	0	0	0	0	0	0	0	0	0	0	0	0	0	0	0	0	0	0	0	0
NC_007530	1397680	ACAAAGGTTA.CATGATGTGA	C	T	40	PASS	NA	GT	0	0	0	0	0	0	0	0	0	0	0	0	0	0	0	0	0	0	0	0	0	0	0	0	0	0	0	1	0	0	0	0	0	0	0	0	0	0	0	0	0
NC_007530	1399271	ATTAATGCTG.CTCTTTTCCA	C	T	40	PASS	NA	GT	0	1	1	1	1	1	1	1	1	1	1	1	1	1	1	1	1	1	1	1	1	1	1	1	1	1	1	1	1	1	1	1	1	1	1	1	1	1	1	1	1
NC_007530	1400969	CGGTCTTTTA.AGTTTACAGA	A	G	40	PASS	NA	GT	0	0	0	0	0	0	0	0	0	0	0	0	0	0	0	0	0	0	0	0	0	0	0	0	0	0	0	0	0	0	0	0	0	0	0	0	0	0	0	0	0
NC_007530	1402404	TGTCCATGCT.TTCACGGTAA	T	C	40	PASS	NA	GT	0	0	0	0	0	0	0	0	0	0	0	0	0	0	0	0	0	0	0	0	0	0	0	0	1	0	0	1	0	0	0	0	0	0	0	0	0	0	0	0	0
NC_007530	1402484	TCGTAAGCTT.TCTTTAAAAG	T	C	40	PASS	NA	GT	0	0	0	0	1	0	0	0	0	0	0	0	0	0	0	0	0	0	0	0	0	0	0	0	0	0	0	0	0	0	0	0	0	0	0	0	0	0	0	0	0
NC_007530	1403535	TGTTCAAGCG.ATTCGTAGAG	A	G	40	PASS	NA	GT	0	0	0	0	0	0	0	0	0	0	0	0	0	0	0	0	0	0	0	0	0	0	0	0	0	0	0	0	0	0	0	0	0	0	0	0	0	0	0	0	0
NC_007530	1406170	AAATGCGATG.ATTTTTCCAT	A	T	40	PASS	NA	GT	0	0	0	0	0	0	0	0	0	1	0	0	0	0	0	0	0	0	0	0	0	0	0	0	0	0	0	0	0	0	0	0	0	0	0	0	0	0	0	0	0
NC_007530	1406263	CTCTTTTTTT.CCACCGAGCC	C	T	40	PASS	NA	GT	0	0	1	0	0	0	0	0	0	0	0	0	0	0	0	0	0	0	0	0	0	0	0	0	0	0	0	0	0	0	0	0	0	0	0	0	0	0	0	0	0
NC_007530	1406698	ATGACTAAGT.ACATTTCCGC	A	C	40	PASS	NA	GT	0	0	0	0	0	0	0	0	1	0	0	0	0	0	0	0	0	0	0	0	0	0	0	0	0	0	0	0	0	0	0	0	0	0	0	0	0	0	0	0	0
NC_007530	1407906	AACTTGTGTC.TAATATTCCG	T	C	40	PASS	NA	GT	0	0	0	0	0	0	0	0	0	0	0	0	0	0	0	0	0	0	0	0	0	0	0	0	0	0	0	0	0	0	0	0	0	0	0	0	0	0	0	0	0
NC_007530	1408371	TAAATACAAC.TCTCCTTGTA	T	C	40	PASS	NA	GT	0	0	0	0	0	0	0	0	0	0	0	0	0	0	0	0	0	0	0	0	0	0	0	0	0	0	0	0	0	0	0	0	0	0	0	0	0	0	0	0	0
NC_007530	1408777	GATATTGTAG.CGATATGCTG	C	T	40	PASS	NA	GT	0	0	0	0	0	0	0	0	0	0	0	0	0	0	0	0	1	0	0	0	0	0	0	0	0	0	0	0	0	0	0	0	0	0	0	0	0	0	0	0	0
NC_007530	1409911	GAACCATATA.TTTCTAGAGA	T	C	40	PASS	NA	GT	0	0	0	0	0	0	0	0	0	0	0	0	0	0	0	0	0	0	0	0	0	0	0	0	0	0	0	0	0	0	0	0	0	0	0	0	0	0	0	0	0
NC_007530	1412166	ATTCGAATGA.CGTATGAATC	C	T	40	PASS	NA	GT	0	0	0	0	0	0	0	0	1	0	0	0	0	0	0	0	0	0	0	0	0	0	0	0	0	0	0	0	0	0	0	0	0	0	0	0	0	0	0	0	0
NC_007530	1412568	TTCCACTAGC.ACTTATACGT	A	T	40	PASS	NA	GT	0	0	0	0	0	0	0	0	1	0	0	0	0	0	0	0	0	0	0	0	0	0	0	0	0	0	0	0	0	0	0	0	0	0	0	0	0	0	0	0	0
NC_007530	1412841	CATTTTTTAT.GCTATTTCGC	G	T	40	PASS	NA	GT	0	0	1	0	0	0	0	0	0	0	0	0	0	0	0	0	0	0	0	0	0	0	0	0	0	0	0	0	0	0	0	0	0	0	0	0	0	0	0	0	0
NC_007530	1413138	AAAGTGATTG.CGCAAGCAGG	C	A	40	PASS	NA	GT	0	0	1	0	0	0	0	0	0	0	0	0	0	0	0	0	0	0	0	0	0	0	0	0	0	0	0	0	0	0	0	0	0	0	0	0	0	0	0	0	0
NC_007530	1413410	CCCAATCGGA.CGTTTAGATT	C	T	40	PASS	NA	GT	0	0	0	0	0	0	0	0	1	0	0	0	0	0	0	0	0	0	0	0	0	0	0	0	0	0	0	0	0	0	0	0	0	0	0	0	0	0	0	0	0
NC_007530	1413417	GGACGTTTAG.ATTATGATAC	A	C	40	PASS	NA	GT	0	0	0	0	0	0	0	0	1	0	0	0	0	0	0	0	0	0	0	0	0	0	0	0	0	0	0	0	0	0	0	0	0	0	0	0	0	0	0	0	0
NC_007530	1414508	CTCTGGTTTA.AAAATTCTGA	A	G	40	PASS	NA	GT	0	0	0	0	0	1	0	0	0	0	0	0	0	0	0	0	0	0	0	0	0	0	0	0	0	0	0	0	0	0	0	0	0	0	0	0	0	0	0	0	0
NC_007530	1414607	TGTGAATGTG.GACATGTGAA	G	A	40	PASS	NA	GT	0	0	0	0	0	0	0	0	0	1	0	0	0	0	0	0	0	0	0	0	0	0	0	0	0	0	0	0	0	0	0	0	0	0	0	0	0	0	0	0	0
NC_007530	1414684	TATAAAACTA.TTGGATATGC	T	A	40	PASS	NA	GT	0	0	0	0	0	0	0	0	0	1	0	0	0	0	0	0	0	0	0	0	0	0	0	0	0	0	0	0	0	0	0	0	0	0	0	0	0	0	0	0	0
NC_007530	1415751	TAAACTATTT.CCCAGATTTT	C	A	40	PASS	NA	GT	0	0	0	0	0	0	0	0	0	0	0	0	0	1	0	0	0	0	0	0	0	0	0	0	0	0	0	0	0	0	0	0	0	0	0	0	0	0	0	0	0
NC_007530	1416137	AAAGATATTG.AAAGAGTACT	A	C	40	PASS	NA	GT	0	0	0	0	0	0	0	0	0	0	0	0	0	0	0	0	0	0	0	0	0	0	0	0	0	0	0	0	0	0	0	0	0	0	0	0	0	0	0	0	0
NC_007530	1417275	AGGATGGCAC.GGAGATAAGT	G	A	40	PASS	NA	GT	0	0	0	0	0	0	0	0	0	0	0	0	0	0	0	0	0	0	0	0	0	0	0	0	0	0	0	0	0	0	0	0	0	0	0	0	0	0	0	0	0
NC_007530	1419218	AATCAAGAAG.GTGAAGTCGT	G	T	40	PASS	NA	GT	0	0	0	0	0	0	0	0	1	0	0	0	0	0	0	0	0	0	0	0	0	0	0	0	0	0	0	0	0	0	0	0	0	0	0	0	0	0	0	0	0
NC_007530	1419375	GAATTAATTT.ACAAAAAGGT	A	G	40	PASS	NA	GT	0	0	0	0	0	0	0	0	0	0	0	0	0	0	0	0	0	0	1	0	0	0	0	0	0	0	0	0	0	0	0	0	0	0	0	0	0	0	0	0	0
NC_007530	1419414	CGCCGCTTTA.CAATCAAACG	C	T	40	PASS	NA	GT	0	0	1	1	1	1	1	0	0	0	0	0	0	0	0	0	1	0	0	0	0	1	0	0	0	0	0	0	0	0	0	0	0	0	0	0	0	0	0	0	0
NC_007530	1419742	TGAAAAAATA.GGTCGTAAAT	G	T	40	PASS	NA	GT	0	0	1	0	0	0	0	0	0	0	0	0	0	0	0	0	0	0	0	0	0	0	0	0	0	0	0	0	0	0	0	0	0	0	0	0	0	0	0	0	0
NC_007530	1419814	TTCAATTGAG.CAGTACCCGT	C	T	40	PASS	NA	GT	0	0	0	0	0	0	0	0	1	0	0	0	0	0	0	0	0	0	0	0	0	0	0	0	0	0	0	0	0	0	0	0	0	0	0	0	0	0	0	0	0
NC_007530	1420205	GAATAAAGTT.CTGCTGTTTT	C	A	40	PASS	NA	GT	0	0	1	0	0	0	0	0	0	0	0	0	0	0	0	0	0	0	0	0	0	0	0	0	0	0	0	0	0	0	0	0	0	0	0	0	0	0	0	0	0
NC_007530	1420606	GATTTATATA.TAGAAGAAGC	T	A	40	PASS	NA	GT	0	0	0	0	0	0	0	0	0	0	0	0	0	1	0	0	0	0	0	0	0	0	0	0	0	0	0	0	0	0	0	0	0	0	0	0	0	0	0	0	0
NC_007530	1420608	TTTATATATA.GAAGAAGCCC	G	A	40	PASS	NA	GT	0	0	0	0	0	0	0	0	0	0	0	0	0	1	0	0	0	0	0	0	0	0	0	0	0	0	0	0	0	0	0	0	0	0	0	0	0	0	0	0	0
NC_007530	1420614	TATAGAAGAA.GCCCCGCCAC	G	C	40	PASS	NA	GT	0	0	0	0	0	0	0	0	0	0	0	0	0	1	0	0	0	0	0	0	0	0	0	0	0	0	0	0	0	0	0	0	0	0	0	0	0	0	0	0	0
NC_007530	1420668	GGCGGCTACT.ATTCATATTG	A	T	40	PASS	NA	GT	0	0	0	0	0	0	0	0	0	1	0	0	0	0	0	0	0	0	0	0	0	0	0	0	0	0	0	0	0	0	0	0	0	0	0	0	0	0	0	0	0
NC_007530	1421109	AAGGCATGGA.AAACACTATG	A	G	40	PASS	NA	GT	0	0	0	0	0	1	0	0	0	0	0	0	0	0	0	0	0	0	0	0	0	0	0	0	0	0	0	0	0	0	0	0	0	0	0	0	0	0	0	0	0
NC_007530	1421521	ACACTTAAGG.AAATTAAAGA	A	T	40	PASS	NA	GT	0	0	0	0	0	0	0	0	0	1	0	0	0	0	0	0	0	0	0	0	0	0	0	0	0	0	0	0	0	0	0	0	0	0	0	0	0	0	0	0	0
NC_007530	1421720	CTAAAAGAAA.ACCGTCCCAA	A	G	40	PASS	NA	GT	0	0	0	0	0	0	0	0	0	0	0	0	0	0	0	0	1	0	0	0	0	0	0	0	0	0	0	0	0	0	0	0	0	0	0	0	0	0	0	0	0
NC_007530	1421728	AAACCGTCCC.AAAATTTATT	A	T	40	PASS	NA	GT	0	0	0	0	0	0	0	0	1	0	0	0	0	0	0	0	0	0	0	0	0	0	0	0	0	0	0	0	0	0	0	0	0	0	0	0	0	0	0	0	0
NC_007530	1421729	AACCGTCCCA.AAATTTATTT	A	T	40	PASS	NA	GT	0	0	0	0	0	0	0	0	1	0	0	0	0	0	0	0	0	0	0	0	0	0	0	0	0	0	0	0	0	0	0	0	0	0	0	0	0	0	0	0	0
NC_007530	1424176	TAATGAGCGA.CAGTAGATAG	C	T	40	PASS	NA	GT	0	0	0	0	0	0	0	0	1	0	0	0	0	0	0	0	0	0	0	0	0	0	0	0	0	0	0	0	0	0	0	0	0	0	0	0	0	0	0	0	0
NC_007530	1425424	AATCTATGTG.CTATCAGTTT	C	A	40	PASS	NA	GT	0	0	1	0	0	0	0	0	0	0	0	0	0	0	0	0	0	0	0	0	0	0	0	0	0	0	0	0	0	0	0	0	0	0	0	0	0	0	0	0	0
NC_007530	1425715	TTTCTCAATG.GGGTTATGAT	G	T	40	PASS	NA	GT	0	0	1	0	0	0	0	0	0	0	0	0	0	0	0	0	0	0	0	0	0	0	0	0	0	0	0	0	0	0	0	0	0	0	0	0	0	0	0	0	0
NC_007530	1425897	AATATTGCAA.TGGATGTGCA	T	A	40	PASS	NA	GT	0	0	0	0	0	0	0	0	0	0	0	0	0	0	0	0	0	0	0	0	0	0	0	0	0	0	0	0	0	0	0	0	0	0	0	0	0	0	0	0	0
NC_007530	1427083	TGGTATTAAC.GATAAGATGT	G	T	40	PASS	NA	GT	0	0	0	0	0	0	0	0	0	0	0	0	0	0	0	0	0	0	0	0	0	0	0	0	0	0	0	0	0	0	0	0	0	0	0	0	0	0	0	0	0
NC_007530	1427676	TCAGCTAAAT.CTGAGTCGCA	C	T	40	PASS	NA	GT	0	0	0	0	0	0	0	0	0	0	0	0	0	0	0	0	0	0	0	0	1	0	0	0	0	0	0	0	0	0	0	0	0	0	0	0	0	0	0	0	0
NC_007530	1427847	TTAAAAATTC.GGATAAAAGA	G	C	40	PASS	NA	GT	0	1	1	1	1	1	1	1	1	1	1	1	1	1	1	1	1	1	1	1	1	1	1	1	1	1	1	1	1	1	1	1	1	1	1	1	1	1	1	1	1
NC_007530	1428116	TGATATTCAT.AGAAGGGTCA	A	C	40	PASS	NA	GT	0	0	0	0	0	0	0	0	0	1	0	0	0	0	0	0	0	0	0	0	0	0	0	0	0	0	0	0	0	0	0	0	0	0	0	0	0	0	0	0	0
NC_007530	1430774	GATATCGTGC.ACAACATAAT	A	G	40	PASS	NA	GT	0	0	0	0	0	0	0	0	0	0	0	0	0	0	0	0	0	0	0	0	0	0	0	0	0	0	0	0	0	0	0	0	0	0	0	0	0	0	0	0	0
NC_007530	1431387	TCGTGATAGC.TTCGGTACAG	T	A	40	PASS	NA	GT	0	0	0	0	0	0	0	0	0	1	0	0	0	0	0	0	0	0	0	0	0	0	0	0	0	0	0	0	0	0	0	0	0	0	0	0	0	0	0	0	0
NC_007530	1431582	TTTAACAGAT.CGCGGAATTT	C	A	40	PASS	NA	GT	0	0	0	0	0	0	0	0	0	1	0	0	0	0	0	0	0	0	0	0	0	0	0	0	0	0	0	0	0	0	0	0	0	0	0	0	0	0	0	0	0
NC_007530	1431951	AGTAGAACAA.TTAGAAGAAA	T	A	40	PASS	NA	GT	0	0	0	0	0	0	0	0	0	1	0	0	0	0	0	0	0	0	0	0	0	0	0	0	0	0	0	0	0	0	0	0	0	0	0	0	0	0	0	0	0
NC_007530	1431962	TAGAAGAAAA.AGTTAAGAGG	A	G	40	PASS	NA	GT	0	1	1	1	1	1	1	1	1	1	1	1	1	1	1	1	1	1	1	1	1	1	1	1	1	1	1	1	1	1	1	1	1	1	1	1	1	1	1	1	1
NC_007530	1432141	AAAAACAAAA.AGAACGCTTG	A	G	40	PASS	NA	GT	0	0	0	0	0	0	0	0	0	0	0	0	0	0	0	0	0	1	0	0	0	0	0	0	0	0	0	0	0	0	0	0	0	0	0	0	0	0	0	0	0
NC_007530	1432158	TTGTTCTGTG.CGAACAAACG	C	T	40	PASS	NA	GT	0	0	0	0	0	0	0	0	0	0	0	0	0	0	0	0	0	1	0	0	0	0	0	0	0	0	0	0	0	0	0	0	0	0	0	0	0	0	0	0	0
NC_007530	1433827	CGGTACAATT.CAAATGCATT	C	T	40	PASS	NA	GT	0	0	0	0	0	0	0	0	0	0	0	0	0	0	0	0	0	0	0	0	0	0	0	0	0	0	0	0	0	0	0	0	0	1	0	0	0	0	0	0	0
NC_007530	1434823	TCATTACTAG.ATCGCATTGC	A	G	40	PASS	NA	GT	0	0	0	0	0	0	0	0	0	0	0	0	0	0	0	0	0	0	0	0	0	0	0	0	0	0	0	0	0	0	0	0	0	0	0	0	0	0	0	0	0
NC_007530	1435148	CACCTGTGTG.TAAAACTAGG	T	C	40	PASS	NA	GT	0	0	0	0	0	0	0	0	1	0	0	0	0	0	0	0	0	0	0	0	0	0	0	0	0	0	0	0	0	0	0	0	0	0	0	0	0	0	0	0	0
NC_007530	1435149	ACCTGTGTGT.AAAACTAGGA	A	C	40	PASS	NA	GT	0	0	0	0	0	0	0	0	1	0	0	0	0	0	0	0	0	0	0	0	0	0	0	0	0	0	0	0	0	0	0	0	0	0	0	0	0	0	0	0	0
NC_007530	1435579	AATGACGTGA.AGCAAATGAG	A	T	40	PASS	NA	GT	0	0	0	0	0	0	0	0	0	1	0	0	0	0	0	0	0	0	0	0	0	0	0	0	0	0	0	0	0	0	0	0	0	0	0	0	0	0	0	0	0
NC_007530	1435693	CCAGCAGCTG.CTGGAAAAAG	C	T	40	PASS	NA	GT	0	0	0	0	0	0	0	0	0	0	0	0	0	0	0	0	0	0	0	0	0	0	0	0	0	0	0	0	0	0	0	0	0	0	0	0	0	0	0	0	0
NC_007530	1436463	AGAATATATT.CGCTATTATA	C	T	40	PASS	NA	GT	0	0	0	0	0	0	0	0	0	0	0	0	0	0	0	0	0	0	0	0	0	0	0	0	0	0	0	0	0	0	0	0	0	0	0	0	0	0	0	0	0
NC_007530	1437213	AGCGATTTCT.TCATTAAAAG	T	A	40	PASS	NA	GT	0	0	0	0	0	0	0	0	1	0	0	0	0	0	0	0	0	0	0	0	0	0	0	0	0	0	0	0	0	0	0	0	0	0	0	0	0	0	0	0	0
NC_007530	1438947	AGTTGATAGT.CTATAAATAT	C	A	40	PASS	NA	GT	0	0	0	0	0	0	0	0	0	0	0	0	0	0	0	0	0	0	0	0	0	0	0	0	0	0	0	0	0	0	0	0	0	0	0	0	0	0	0	0	0
NC_007530	1438952	ATAGTCTATA.AATATTTTAT	A	T	40	PASS	NA	GT	0	0	0	0	0	0	0	0	0	0	0	0	0	0	0	0	0	0	0	0	0	0	0	0	0	0	0	0	0	0	0	0	0	0	0	0	0	0	0	0	0
NC_007530	1438967	TTTATAATAT.GTATATAAAA	G	A	40	PASS	NA	GT	0	0	0	0	0	0	0	0	0	0	0	0	0	0	1	0	0	0	0	0	0	0	0	0	0	0	0	0	0	0	0	0	0	0	0	0	0	0	0	0	0
NC_007530	1438974	TATGTATATA.AAAACATTAT	A	T	40	PASS	NA	GT	0	0	0	0	0	0	0	0	0	0	0	0	0	0	0	0	0	0	0	0	0	0	0	0	0	0	0	0	0	0	0	0	0	0	0	0	0	0	0	0	0
NC_007530	1438976	TGTATATAAA.AACATTATAT	A	T	40	PASS	NA	GT	0	0	0	0	0	0	0	0	0	0	0	0	0	0	0	0	0	0	0	0	0	0	0	0	0	0	0	0	0	0	0	0	0	0	0	0	0	0	0	0	0
NC_007530	1438978	TATATAAAAA.CATTATATTG	C	T	40	PASS	NA	GT	0	0	0	0	0	0	0	0	0	0	0	0	0	0	0	0	0	0	0	0	0	0	0	0	0	0	0	0	0	0	0	0	0	0	0	0	0	0	0	0	0
NC_007530	1439285	AACCCGGCGT.GATTCTCTTA	G	C	40	PASS	NA	GT	0	0	0	0	0	0	0	0	1	0	0	0	0	0	0	0	0	0	0	0	0	0	0	0	0	0	0	0	0	0	0	0	0	0	0	0	0	0	0	0	0
NC_007530	1439323	CTTTACCCAT.AATGAATAGC	A	G	40	PASS	NA	GT	0	0	0	0	0	0	0	0	1	0	0	0	0	0	0	0	0	0	0	0	0	0	0	0	0	0	0	0	0	0	0	0	0	0	0	0	0	0	0	0	0
NC_007530	1441049	TTGCAAATAA.TTTAGAGGCA	T	C	40	PASS	NA	GT	0	0	0	0	0	0	0	0	1	0	0	0	0	0	0	0	0	0	0	0	0	0	0	0	0	0	0	0	0	0	0	0	0	0	0	0	0	0	0	0	0
NC_007530	1441451	CCATTTTTGA.CACAAATTCG	C	A	40	PASS	NA	GT	0	0	0	0	0	0	0	0	1	0	0	0	0	0	0	0	0	0	0	0	0	0	0	0	0	0	0	0	0	0	0	0	0	0	0	0	0	0	0	0	0
NC_007530	1441454	TTTTTGACAC.AAATTCGTCA	A	G	40	PASS	NA	GT	0	0	0	0	0	0	0	0	1	0	0	0	0	0	0	0	0	0	0	0	0	0	0	0	0	0	0	0	0	0	0	0	0	0	0	0	0	0	0	0	0
NC_007530	1441860	TTAGTAATGT.AGCAGGAACA	A	G	40	PASS	NA	GT	0	0	0	0	0	0	0	0	0	1	0	0	0	0	0	0	0	0	0	0	0	0	0	0	0	0	0	0	0	0	0	0	0	0	0	0	0	0	0	0	0
NC_007530	1442573	TGTGATTTTA.TGACAAAAAT	T	G	40	PASS	NA	GT	0	0	0	0	0	0	0	0	0	0	0	0	0	0	0	0	0	0	0	0	0	0	0	0	0	0	0	0	0	0	0	0	0	0	0	0	0	0	0	0	0
NC_007530	1443266	AAAATGGGCG.GAAATCCGTT	G	T	40	PASS	NA	GT	0	0	1	0	0	0	0	0	0	0	0	0	0	0	0	0	0	0	0	0	0	0	0	0	0	0	0	0	0	0	0	0	0	0	0	0	0	0	0	0	0
NC_007530	1443981	AAACAAAGAG.TTTGTAGAGT	T	G	40	PASS	NA	GT	0	0	0	0	0	0	0	0	0	0	0	0	0	1	0	0	0	0	0	0	0	0	0	0	0	0	0	0	0	0	0	0	0	0	0	0	0	0	0	0	0
NC_007530	1443998	AGTGCATATG.ATAGCCATGA	A	G	40	PASS	NA	GT	0	0	0	0	0	0	0	0	0	0	0	0	0	1	0	0	0	0	0	0	0	0	0	0	0	0	0	0	0	0	0	0	0	0	0	0	0	0	0	0	0
NC_007530	1444057	CCGAAGCGAG.AGATACACTC	A	T	40	PASS	NA	GT	0	0	0	0	0	0	0	0	0	0	0	0	0	0	0	0	0	0	0	0	0	0	0	0	0	0	0	0	0	0	0	0	0	0	0	0	0	0	0	0	0
NC_007530	1444059	GAAGCGAGAG.ATACACTCGC	A	T	40	PASS	NA	GT	0	0	0	0	0	0	0	0	0	0	0	0	0	0	0	0	0	0	0	0	0	0	0	0	0	0	0	0	0	0	0	0	0	0	0	0	0	0	0	0	0
NC_007530	1444060	AAGCGAGAGA.TACACTCGCT	T	A	40	PASS	NA	GT	0	0	0	0	0	0	0	0	0	0	0	0	0	0	0	0	0	0	0	0	0	0	0	0	0	0	0	0	0	0	0	0	0	0	0	0	0	0	0	0	0
NC_007530	1444061	AGCGAGAGAT.ACACTCGCTT	A	T	40	PASS	NA	GT	0	0	0	0	0	0	0	0	0	0	0	0	0	0	0	0	0	0	0	0	0	0	0	0	0	0	0	0	0	0	0	0	0	0	0	0	0	0	0	0	0
NC_007530	1444063	CGAGAGATAC.ACTCGCTTCG	A	T	40	PASS	NA	GT	0	0	0	0	0	0	0	0	0	0	0	0	0	0	0	0	0	0	0	0	0	0	0	0	0	0	0	0	0	0	0	0	0	0	0	0	0	0	0	0	0
NC_007530	1445501	CACAGGCGGT.GATATTTATT	G	T	40	PASS	NA	GT	0	0	1	0	0	0	0	0	0	0	0	0	0	0	0	0	0	0	0	0	0	0	0	0	0	0	0	0	0	0	0	0	0	0	0	0	0	0	0	0	0
NC_007530	1445536	CTGTTCGAAC.AGGGAAATCA	A	G	40	PASS	NA	GT	0	0	0	0	0	0	0	0	0	0	0	0	0	0	0	0	0	0	0	0	0	0	0	0	0	0	0	0	0	0	0	0	0	0	0	0	0	0	0	0	0
NC_007530	1445879	AGTAATTCAG.GAACATTCAA	G	T	40	PASS	NA	GT	0	0	0	0	0	0	0	0	0	1	0	0	0	0	0	0	0	0	0	0	0	0	0	0	0	0	0	0	0	0	0	0	0	0	0	0	0	0	0	0	0
NC_007530	1446859	AAAATGCGAG.ATATAAATTA	A	T	40	PASS	NA	GT	0	0	0	0	0	0	0	0	1	0	0	0	0	0	0	0	0	0	0	0	0	0	0	0	0	0	0	0	0	0	0	0	0	0	0	0	0	0	0	0	0
NC_007530	1446947	AATCCCTCTC.ATCGTAGAGG	A	T	40	PASS	NA	GT	0	0	0	0	0	0	0	0	0	1	0	0	0	0	0	0	0	0	0	0	0	0	0	0	0	0	0	0	0	0	0	0	0	0	0	0	0	0	0	0	0
NC_007530	1447778	AAGATCCGAA.AGAACATTTA	A	G	40	PASS	NA	GT	0	0	0	0	0	0	0	0	1	0	0	0	0	0	0	0	0	0	0	0	0	0	0	0	0	0	0	0	0	0	0	0	0	0	0	0	0	0	0	0	0
NC_007530	1447821	TGAGGAGCTT.GTACTAGTAA	G	T	40	PASS	NA	GT	0	0	1	0	0	0	0	0	0	0	0	0	0	0	0	0	0	0	0	0	0	0	0	0	0	0	0	0	0	0	0	0	0	0	0	0	0	0	0	0	0
NC_007530	1448006	CAACAGTAGC.GAACTCTATT	G	A	40	PASS	NA	GT	0	0	0	0	0	0	0	0	0	0	0	0	0	0	0	0	0	0	0	0	0	0	0	0	1	1	0	1	0	0	0	0	0	0	0	0	0	0	0	0	0
NC_007530	1449693	ATATTTTATA.TTTTAAATAT	T	C	40	PASS	NA	GT	0	1	1	1	1	1	1	1	1	1	1	1	1	1	1	1	1	1	1	1	1	1	1	1	1	1	1	1	1	1	1	1	1	1	1	1	1	1	1	1	1
NC_007530	1450497	GCTGGCGCTA.ATCGTGATAC	A	G	40	PASS	NA	GT	0	0	0	0	0	0	0	0	1	0	0	0	0	0	0	0	0	0	0	0	0	0	0	0	0	0	0	0	0	0	0	0	0	0	0	0	0	0	0	0	0
NC_007530	1450498	CTGGCGCTAA.TCGTGATACG	T	A	40	PASS	NA	GT	0	0	0	0	0	0	0	0	1	0	0	0	0	0	0	0	0	0	0	0	0	0	0	0	0	0	0	0	0	0	0	0	0	0	0	0	0	0	0	0	0
NC_007530	1451825	TAGTGGCGGA.TGATATAAAT	T	C	40	PASS	NA	GT	0	0	0	0	0	0	0	0	0	0	0	0	0	0	0	0	0	0	0	0	0	0	0	0	0	0	0	0	0	0	0	0	0	0	0	0	0	0	0	1	1
NC_007530	1452037	GAAAAAGAAA.TGAAAAGGAA	T	G	40	PASS	NA	GT	0	0	0	0	0	0	0	0	1	0	0	0	0	0	0	0	0	0	0	0	0	0	0	0	0	0	0	0	0	0	0	0	0	0	0	0	0	0	0	0	0
NC_007530	1454249	AACGAAAATC.CGTTCGGTTG	C	T	40	PASS	NA	GT	0	0	0	0	0	0	0	0	0	0	0	0	0	0	0	0	0	0	0	0	0	0	0	0	0	0	0	0	0	0	0	0	0	0	0	0	0	0	0	0	0
NC_007530	1454348	CGAACACAAG.TAGCAAAACA	T	C	40	PASS	NA	GT	0	0	0	0	0	0	0	0	0	0	0	0	0	0	0	0	0	0	0	0	0	0	1	0	0	0	0	0	0	0	1	0	0	0	0	0	0	0	0	0	0
NC_007530	1455054	TCTTAAAACT.CGGTATTCCT	C	T	40	PASS	NA	GT	0	0	0	0	0	0	0	0	0	0	0	0	0	0	0	0	0	0	0	0	0	0	0	0	0	0	0	0	1	0	0	0	0	0	0	0	0	0	0	0	0
NC_007530	1455705	TTACGGATGA.AGCGTTATCT	A	T	40	PASS	NA	GT	0	0	0	0	0	0	0	0	0	0	0	0	0	0	0	0	0	0	0	0	0	0	0	0	0	0	0	0	0	0	0	0	0	0	0	0	0	0	0	0	0
NC_007530	1458264	TGGCGGCGGG.TATTTTAATG	T	G	40	PASS	NA	GT	0	0	0	0	0	0	0	0	0	0	0	0	0	1	0	0	0	0	0	0	0	0	0	0	0	0	0	0	0	0	0	0	0	0	0	0	0	0	0	0	0
NC_007530	1461539	TAGCATACTT.TGTTACAGTT	T	C	40	PASS	NA	GT	0	0	0	0	0	0	0	0	1	0	0	0	0	0	0	0	0	0	0	0	0	0	0	0	0	0	0	0	0	0	0	0	0	0	0	0	0	0	0	0	0
NC_007530	1462495	TTCTAAGAAT.AGATAATGTA	A	G	40	PASS	NA	GT	0	1	0	0	0	0	0	1	0	0	1	1	1	1	0	0	0	0	0	0	0	0	0	0	0	0	0	0	0	0	0	0	0	0	0	0	0	0	0	0	0
NC_007530	1462745	AGTGGCTCGG.AAAATTTTAG	A	G	40	PASS	NA	GT	0	0	0	0	0	0	0	0	0	0	0	0	0	1	0	0	0	0	0	0	0	0	0	0	0	0	0	0	0	0	0	0	0	0	0	0	0	0	0	0	0
NC_007530	1462753	GGAAAATTTT.AGATGAGAAT	A	T	40	PASS	NA	GT	0	0	0	0	0	0	0	0	0	0	0	0	0	1	0	0	0	0	0	0	0	0	0	0	0	0	0	0	0	0	0	0	0	0	0	0	0	0	0	0	0
NC_007530	1462765	ATGAGAATGG.ATTATATAAC	A	G	40	PASS	NA	GT	0	0	0	0	0	0	0	0	0	0	0	0	0	1	0	0	0	0	0	0	0	0	0	0	0	0	0	0	0	0	0	0	0	0	0	0	0	0	0	0	0
NC_007530	1463268	TTAATGTATA.CTGGTATGCA	C	T	40	PASS	NA	GT	0	0	0	0	0	0	0	0	0	0	0	0	0	0	0	0	0	0	0	0	0	0	0	0	0	0	0	0	0	0	0	0	0	0	0	0	0	0	0	0	0
NC_007530	1463773	GAAACTAAAT.CCGAAGCTAA	C	A	40	PASS	NA	GT	0	0	0	0	0	0	0	0	0	0	0	0	0	0	0	0	0	0	0	0	0	0	0	0	0	0	0	0	0	0	0	0	0	0	0	0	0	0	0	1	1
NC_007530	1483035	TAATATTTTT.GCGCTGCTGT	G	C	40	PASS	NA	GT	0	0	0	0	0	0	0	0	0	0	0	0	1	0	0	0	0	0	0	0	0	0	0	0	0	0	0	0	0	0	0	0	0	0	0	0	0	0	0	0	0
NC_007530	1483053	GTCGCAATCC.CATATGAACG	C	T	40	PASS	NA	GT	0	0	0	0	0	0	0	0	0	0	0	0	0	0	0	0	0	0	0	0	0	0	0	0	0	0	0	0	0	0	0	0	0	1	0	0	0	0	0	0	0
NC_007530	1483138	ATTTGTAAGA.TAAGTACCAT	T	A	40	PASS	NA	GT	0	0	0	0	0	0	0	0	0	0	0	0	0	0	0	1	0	0	0	0	0	0	0	0	0	0	0	0	0	0	0	0	0	0	0	0	0	0	0	0	0
NC_007530	1483227	GTACTACCAC.CTTGAGATCC	C	T	40	PASS	NA	GT	0	0	0	0	0	0	0	0	0	0	0	0	0	0	0	0	0	0	0	0	0	0	0	0	0	0	0	0	0	0	0	0	0	0	0	0	0	0	0	0	0
NC_007530	1483622	TTGATTTTTT.ACATGATTTC	A	G	40	PASS	NA	GT	0	0	0	0	0	0	0	0	1	0	0	0	0	0	0	0	0	0	0	0	0	0	0	0	0	0	0	0	0	0	0	0	0	0	0	0	0	0	0	0	0
NC_007530	1483992	GGTGGAAGTT.TTGAAGTGGA	T	C	40	PASS	NA	GT	0	0	0	0	0	0	0	0	1	0	0	0	0	0	0	0	0	0	0	0	0	0	0	0	0	0	0	0	0	0	0	0	0	0	0	0	0	0	0	0	0
NC_007530	1485616	AGACCCCACC.TAAATTCAGC	T	A	40	LCB	NA	GT	0	0	0	0	0	0	0	0	0	0	0	0	0	0	0	0	0	0	0	0	0	0	0	0	0	0	0	0	0	0	0	0	0	0	0	0	0	0	0	0	0
NC_007530	1485780	TTTTGGGTTT.ATTTTGTTTG	A	T	40	PASS	NA	GT	0	0	0	0	0	0	0	0	0	0	0	0	0	0	0	0	0	0	0	0	0	0	0	0	0	0	0	0	0	0	0	0	0	0	0	0	0	0	0	0	0
NC_007530	1486119	AAATATGCAA.CAAGATAGAA	C	T	40	PASS	NA	GT	0	0	0	0	0	0	0	0	0	0	0	0	0	0	0	0	0	0	0	0	0	0	0	0	0	0	0	0	0	0	0	0	0	0	0	0	0	0	0	0	0
NC_007530	1487463	TTTGGTAAGT.AATGTCGAAG	A	G	40	PASS	NA	GT	0	0	0	0	0	0	0	0	0	0	0	0	0	0	0	0	0	0	0	0	0	0	0	0	0	0	0	0	0	0	0	0	0	0	0	0	0	0	0	0	0
NC_007530	1488430	CACAAAACGG.AAGTACGAAA	A	C	40	PASS	NA	GT	0	0	0	0	0	0	0	0	0	1	0	0	0	0	0	0	0	0	0	0	0	0	0	0	0	0	0	0	0	0	0	0	0	0	0	0	0	0	0	0	0
NC_007530	1490725	GGACAAGTAT.TCCGTCCATT	T	C	40	PASS	NA	GT	0	0	0	0	0	0	0	0	1	0	0	0	0	0	0	0	0	0	0	0	0	0	0	0	0	0	0	0	0	0	0	0	0	0	0	0	0	0	0	0	0
NC_007530	1492120	CAACTTTTAA.CGAGATTATT	C	T	40	PASS	NA	GT	0	0	0	0	0	0	0	0	0	0	0	0	0	0	0	0	0	0	0	0	0	0	0	0	0	0	0	0	0	0	0	0	0	0	0	0	0	0	0	0	0
NC_007530	1492348	GAAATGCATA.CAGTAAACAC	C	G	40	PASS	NA	GT	0	0	0	0	0	0	0	0	1	0	0	0	0	0	0	0	0	0	0	0	0	0	0	0	0	0	0	0	0	0	0	0	0	0	0	0	0	0	0	0	0
NC_007530	1492681	TTACTATCTC.ATACGAAAGA	A	C	40	PASS	NA	GT	0	0	0	0	0	0	0	0	0	1	0	0	0	0	0	0	0	0	0	0	0	0	0	0	0	0	0	0	0	0	0	0	0	0	0	0	0	0	0	0	0
NC_007530	1493280	TCGAATTAAG.CTTGAGGTAG	C	T	40	PASS	NA	GT	0	1	1	1	1	1	1	1	1	1	1	1	1	1	1	1	1	1	1	1	1	1	1	1	1	1	1	1	1	1	1	1	1	1	1	1	1	1	1	1	1
NC_007530	1493570	CGACGAAGAA.AATGGTTGAA	A	T	40	PASS	NA	GT	0	0	0	0	0	0	0	0	0	1	0	0	0	0	0	0	0	0	0	0	0	0	0	0	0	0	0	0	0	0	0	0	0	0	0	0	0	0	0	0	0
NC_007530	1494579	CTTCCCATCT.TATGCGCTTG	T	A	40	PASS	NA	GT	0	0	0	0	0	0	0	0	1	0	0	0	0	0	0	0	0	0	0	0	0	0	0	0	0	0	0	0	0	0	0	0	0	0	0	0	0	0	0	0	0
NC_007530	1497229	TGTATAAAGG.AATTGATCAG	A	G	40	PASS	NA	GT	0	0	0	0	0	0	0	0	0	0	0	0	0	0	0	0	0	0	0	0	0	0	0	0	0	0	0	0	0	0	0	0	0	0	0	0	0	0	0	0	0
NC_007530	1497602	GTTTACAAAA.CTCGAACGAA	C	T	40	PASS	NA	GT	0	0	0	0	0	0	0	0	0	0	0	0	0	0	0	0	0	0	0	0	0	0	0	0	0	0	0	0	0	0	0	0	0	0	0	0	0	0	0	0	0
NC_007530	1497820	TCTTTTTTGC.GAAACTCCAA	G	A	40	PASS	NA	GT	0	0	0	0	0	0	0	0	0	1	0	0	0	0	0	0	0	0	0	0	0	0	0	0	0	0	0	0	0	0	0	0	0	0	0	0	0	0	0	0	0
NC_007530	1497825	TTTGCGAAAC.TCCAAAAGCG	T	C	40	PASS	NA	GT	0	0	0	0	0	0	0	0	0	0	0	0	0	0	0	0	0	0	0	0	0	0	0	0	0	0	0	0	0	0	0	0	0	0	0	0	0	0	0	0	0
NC_007530	1501058	TTTTGTGTCA.TTATTTTCCT	T	G	40	PASS	NA	GT	0	0	0	0	0	0	0	0	0	1	0	0	0	0	0	0	0	0	0	0	0	0	0	0	0	0	0	0	0	0	0	0	0	0	0	0	0	0	0	0	0
NC_007530	1501129	GGGTAGATTT.CCATTTTTTA	C	T	40	PASS	NA	GT	0	0	0	0	0	0	0	0	0	0	0	0	0	0	0	0	0	0	0	0	0	0	0	0	0	0	0	0	0	0	0	0	0	0	1	1	0	0	0	0	0
NC_007530	1502730	TTGCGAAAGG.AAAGACTGAG	A	G	40	PASS	NA	GT	0	0	0	0	1	1	0	0	0	0	0	0	0	0	0	0	0	0	0	0	0	0	0	0	0	0	0	0	0	0	0	0	0	0	0	0	0	0	0	0	0
NC_007530	1503761	TCACCAACTG.GGAAGCAAAA	G	C	40	PASS	NA	GT	0	0	0	0	0	0	0	0	1	0	0	0	0	0	0	0	0	0	0	0	0	0	0	0	0	0	0	0	0	0	0	0	0	0	0	0	0	0	0	0	0
NC_007530	1503791	AGCTTTTTAC.GAGCGGTACA	G	T	40	PASS	NA	GT	0	0	1	0	0	0	0	0	0	0	0	0	0	0	0	0	0	0	0	0	0	0	0	0	0	0	0	0	0	0	0	0	0	0	0	0	0	0	0	0	0
NC_007530	1504611	ACGTACAACA.ACGACTATTC	A	G	40	PASS	NA	GT	0	0	0	0	1	1	0	0	0	0	0	0	0	0	0	0	0	0	0	0	0	0	0	0	0	0	0	0	0	0	0	0	0	0	0	0	0	0	0	0	0
NC_007530	1506691	GTAGGACATG.AGAAAGTATA	A	G	40	PASS	NA	GT	0	0	0	0	0	0	0	0	0	0	0	0	0	0	0	0	0	0	0	0	0	0	0	0	0	0	0	0	0	0	0	0	0	0	0	0	0	0	0	0	0
NC_007530	1507691	GCATATGTGG.GGCTATATAA	G	T	40	PASS	NA	GT	0	0	1	0	0	0	0	0	0	0	0	0	0	0	0	0	0	0	0	0	0	0	0	0	0	0	0	0	0	0	0	0	0	0	0	0	0	0	0	0	0
NC_007530	1508167	TTCCGTCTGG.ATCTACAGAA	A	G	40	PASS	NA	GT	0	0	0	0	0	0	0	0	0	0	0	0	0	0	0	0	0	0	0	0	0	0	0	0	1	0	0	1	0	0	0	0	0	0	0	0	0	0	0	0	0
NC_007530	1509870	AAAAGCGAGT.AGTATCGGTA	A	G	40	PASS	NA	GT	0	0	0	0	0	0	0	0	0	0	0	0	0	0	0	0	0	0	0	0	0	0	0	0	0	0	0	0	0	0	0	0	0	0	0	0	0	0	0	0	0
NC_007530	1509887	GTATTCGTGC.GGGGGAAAAA	G	A	40	PASS	NA	GT	0	0	0	0	0	0	0	0	0	0	0	0	0	0	0	0	0	0	0	0	0	0	0	0	0	0	0	0	0	0	0	0	0	0	0	0	0	0	0	0	0
NC_007530	1511095	ATCAATGAAA.GAACAAACAT	G	T	40	PASS	NA	GT	0	0	1	0	0	0	0	0	0	0	0	0	0	0	0	0	0	0	0	0	0	0	0	0	0	0	0	0	0	0	0	0	0	0	0	0	0	0	0	0	0
NC_007530	1516306	TTGTATTATG.ATTGCTTTCG	A	C	40	PASS	NA	GT	0	0	0	0	0	0	0	0	1	0	0	0	0	0	0	0	0	0	0	0	0	0	0	0	0	0	0	0	0	0	0	0	0	0	0	0	0	0	0	0	0
NC_007530	1516338	CTCCAATCTA.TTTTCAAGAA	T	C	40	PASS	NA	GT	0	0	0	0	0	0	0	0	1	0	0	0	0	0	0	0	0	0	0	0	0	0	0	0	0	0	0	0	0	0	0	0	0	0	0	0	0	0	0	0	0
NC_007530	1518088	AAGTTATTTT.GGCGTAACTT	G	T	40	PASS	NA	GT	0	0	1	0	0	0	0	0	0	0	0	0	0	0	0	0	0	0	0	0	0	0	0	0	0	0	0	0	0	0	0	0	0	0	0	0	0	0	0	0	0
NC_007530	1521535	ATTGTGTAGC.GAATCGAATT	G	C	40	PASS	NA	GT	0	0	0	0	0	0	0	0	1	0	0	0	0	0	0	0	0	0	0	0	0	0	0	0	0	0	0	0	0	0	0	0	0	0	0	0	0	0	0	0	0
NC_007530	1522542	AAAAATCCAA.TCAAAATGTT	T	G	40	PASS	NA	GT	0	0	0	0	0	0	0	0	1	0	0	0	0	0	0	0	0	0	0	0	0	0	0	0	0	0	0	0	0	0	0	0	0	0	0	0	0	0	0	0	0
NC_007530	1522544	AAATCCAATC.AAAATGTTAA	A	C	40	PASS	NA	GT	0	0	0	0	0	0	0	0	1	0	0	0	0	0	0	0	0	0	0	0	0	0	0	0	0	0	0	0	0	0	0	0	0	0	0	0	0	0	0	0	0
NC_007530	1523397	TAGTGGAGAG.CGTTCTTCGT	C	T	40	PASS	NA	GT	0	0	0	0	0	0	0	0	0	0	0	0	0	0	0	0	0	0	0	0	0	0	0	0	0	0	0	0	0	0	0	0	0	0	0	0	0	0	0	0	0
NC_007530	1524326	TAATGGTATA.CGTTAAAGTT	C	T	40	PASS	NA	GT	0	0	0	0	0	0	0	0	0	0	0	0	0	0	0	0	0	0	0	0	0	0	0	0	0	0	0	0	0	0	0	0	0	0	0	0	0	0	0	0	0
NC_007530	1526859	TTCGGTTTCA.GTAGGTGGAT	G	T	40	PASS	NA	GT	0	0	0	0	0	0	0	0	0	1	0	0	0	0	0	0	0	0	0	0	0	0	0	0	0	0	0	0	0	0	0	0	0	0	0	0	0	0	0	0	0
NC_007530	1527511	TGTGCATTGA.CGGCTTTTAA	C	G	40	PASS	NA	GT	0	0	0	0	0	0	0	0	1	0	0	0	0	0	0	0	0	0	0	0	0	0	0	0	0	0	0	0	0	0	0	0	0	0	0	0	0	0	0	0	0
NC_007530	1528501	CCCGCGCTAA.CGGTCCCGAT	C	A	40	PASS	NA	GT	0	0	0	0	0	0	0	0	0	0	0	0	0	0	0	0	0	0	0	0	0	0	0	0	0	0	0	0	1	0	0	0	0	0	0	0	0	0	0	0	0
NC_007530	1529125	GTTAAAATAG.CACTTTCAAT	C	G	40	PASS	NA	GT	0	0	0	0	0	0	0	0	1	0	0	0	0	0	0	0	0	0	0	0	0	0	0	0	0	0	0	0	0	0	0	0	0	0	0	0	0	0	0	0	0
NC_007530	1529126	TTAAAATAGC.ACTTTCAATT	A	G	40	PASS	NA	GT	0	0	0	0	0	0	0	0	1	0	0	0	0	0	0	0	0	0	0	0	0	0	0	0	0	0	0	0	0	0	0	0	0	0	0	0	0	0	0	0	0
NC_007530	1530761	GGGCATTAGG.ATCAGCGATA	A	T	40	PASS	NA	GT	0	0	1	1	1	1	1	0	0	0	0	0	0	0	0	0	1	0	0	0	0	1	0	0	0	0	0	0	0	0	0	0	0	0	0	0	0	0	0	0	0
NC_007530	1531733	TAAGTGTTCC.GGAAATAAAA	G	A	40	PASS	NA	GT	0	1	1	1	1	1	1	1	1	1	1	1	1	1	1	1	1	1	1	1	1	1	1	1	1	1	1	1	1	1	1	1	1	1	1	1	1	1	1	1	1
NC_007530	1532108	TTGGTATTCC.GTTTGCTGGA	G	A	40	PASS	NA	GT	0	0	0	0	0	1	0	0	0	0	0	0	0	0	0	0	0	0	0	0	0	0	0	0	0	0	0	0	0	0	0	0	0	0	0	0	0	0	0	0	0
NC_007530	1533107	TTATTACTAA.GGTAGCGTCA	G	T	40	PASS	NA	GT	0	0	0	0	0	0	0	0	0	0	0	0	0	0	0	0	0	0	0	0	0	0	1	0	0	0	0	0	0	0	1	0	0	0	0	0	0	0	0	0	0
NC_007530	1533646	TTTACTTGCA.CTTGGAATGA	C	T	40	PASS	NA	GT	0	0	0	0	0	0	0	0	1	0	0	0	0	0	0	0	0	0	0	0	0	0	0	0	0	0	0	0	0	0	0	0	0	0	0	0	0	0	0	0	0
NC_007530	1533769	AAAGATGTCC.CGCTTGGAAT	C	A	40	PASS	NA	GT	0	0	1	0	0	0	0	0	0	0	0	0	0	0	0	0	0	0	0	0	0	0	0	0	0	0	0	0	0	0	0	0	0	0	0	0	0	0	0	0	0
NC_007530	1535047	ACATCCCCAA.CAGTAGCGGA	C	T	40	PASS	NA	GT	0	0	0	0	0	0	0	0	0	0	0	0	0	0	0	0	0	0	0	0	0	0	0	0	0	0	0	0	0	0	0	0	0	0	0	0	0	0	0	0	0
NC_007530	1536627	TTCACCAATA.TCGGTAAAAA	T	C	40	PASS	NA	GT	0	0	0	0	0	0	0	0	1	0	0	0	0	0	0	0	0	0	0	0	0	0	0	0	0	0	0	0	0	0	0	0	0	0	0	0	0	0	0	0	0
NC_007530	1536628	TCACCAATAT.CGGTAAAAAG	C	T	40	PASS	NA	GT	0	0	0	0	0	0	0	0	1	0	0	0	0	0	0	0	0	0	0	0	0	0	0	0	0	0	0	0	0	0	0	0	0	0	0	0	0	0	0	0	0
NC_007530	1537688	ATGTTACATC.TGCAGAACGT	T	C	40	PASS	NA	GT	0	0	0	0	0	0	0	0	0	0	0	0	0	0	0	0	0	0	0	0	0	0	0	0	0	0	0	0	0	0	0	0	0	0	0	0	0	0	0	0	0
NC_007530	1539728	AAATAAGTTC.CACTGTACAT	C	A	40	PASS	NA	GT	0	0	1	0	0	0	0	0	0	0	0	0	0	0	0	0	0	0	0	0	0	0	0	0	0	0	0	0	0	0	0	0	0	0	0	0	0	0	0	0	0
NC_007530	1540022	AAGCGACAAT.TAAGCATCAA	T	C	40	PASS	NA	GT	0	0	0	0	0	0	0	0	1	0	0	0	0	0	0	0	0	0	0	0	0	0	0	0	0	0	0	0	0	0	0	0	0	0	0	0	0	0	0	0	0
NC_007530	1540114	AGCGCTAAGG.CTTTTATGCG	C	A	40	PASS	NA	GT	0	0	0	0	0	0	0	0	0	0	0	0	0	0	0	0	0	0	0	0	0	0	0	0	0	0	0	0	0	0	0	0	0	0	0	0	0	0	0	0	0
NC_007530	1540887	TGAGAAAAGT.ATTTGAACGA	A	C	40	PASS	NA	GT	0	0	0	0	0	0	0	0	1	0	0	0	0	0	0	0	0	0	0	0	0	0	0	0	0	0	0	0	0	0	0	0	0	0	0	0	0	0	0	0	0
NC_007530	1541639	TACCAAGGTT.CGATACATAG	C	T	40	LCB	NA	GT	0	0	0	0	0	0	0	0	1	0	0	0	0	0	0	0	0	0	0	0	0	0	0	0	0	0	0	0	0	0	0	0	0	0	0	0	0	0	0	0	0
NC_007530	1542573	AGATTTTGTC.GTGAATATTA	G	A	40	PASS	NA	GT	0	1	1	1	1	1	1	1	1	1	1	1	1	1	1	1	1	1	1	1	1	1	1	1	1	1	1	1	1	1	1	1	1	1	1	1	1	1	1	1	1
NC_007530	1542658	TTTGGCTTTA.CGAATGTACA	C	A	40	PASS	NA	GT	0	0	0	0	0	0	0	0	0	0	0	0	0	0	0	0	0	0	0	0	0	0	0	0	0	0	0	0	0	0	0	0	0	0	0	0	0	0	0	0	0
NC_007530	1543891	AAAAGCAACT.CATTACAGAG	C	G	40	PASS	NA	GT	0	0	0	0	0	0	0	0	1	0	0	0	0	0	0	0	0	0	0	0	0	0	0	0	0	0	0	0	0	0	0	0	0	0	0	0	0	0	0	0	0
NC_007530	1543898	ACTCATTACA.GAGGTAAATG	G	T	40	PASS	NA	GT	0	0	0	0	0	0	0	0	1	0	0	0	0	0	0	0	0	0	0	0	0	0	0	0	0	0	0	0	0	0	0	0	0	0	0	0	0	0	0	0	0
NC_007530	1544468	TTTTACTACG.TTAGCAGCTT	T	G	40	PASS	NA	GT	0	0	0	0	0	0	0	0	0	1	0	0	0	0	0	0	0	0	0	0	0	0	0	0	0	0	0	0	0	0	0	0	0	0	0	0	0	0	0	0	0
NC_007530	1545734	TATTTTCAAT.CATTACATCA	C	A	40	PASS	NA	GT	0	0	1	0	0	0	0	0	0	0	0	0	0	0	0	0	0	0	0	0	0	0	0	0	0	0	0	0	0	0	0	0	0	0	0	0	0	0	0	0	0
NC_007530	1545831	ATTAGCGGCG.CCGGTAGGTC	C	G	40	PASS	NA	GT	0	0	0	0	0	0	0	0	1	0	0	0	0	0	0	0	0	0	0	0	0	0	0	0	0	0	0	0	0	0	0	0	0	0	0	0	0	0	0	0	0
NC_007530	1545927	GACTGCAGAT.ATTTTGTTCA	A	G	40	PASS	NA	GT	0	0	0	0	0	0	0	0	0	0	0	0	0	0	0	0	0	0	0	1	0	0	0	0	0	0	0	0	0	0	0	0	0	0	0	0	0	0	0	0	0
NC_007530	1547811	TATTGCTTTA.CCTATTTTAA	C	A	40	PASS	NA	GT	0	0	0	0	0	0	0	0	0	0	0	0	0	0	0	0	0	0	0	0	0	0	0	0	0	0	0	0	0	0	0	0	0	0	0	0	0	0	0	0	0
NC_007530	1547812	ATTGCTTTAC.CTATTTTAAC	C	T	40	PASS	NA	GT	0	0	0	0	0	0	0	0	0	0	0	0	0	0	0	0	0	0	0	0	0	0	0	0	0	0	0	0	0	0	0	0	0	0	0	0	0	0	0	0	0
NC_007530	1547818	TTACCTATTT.TAACATCGTA	T	G	40	PASS	NA	GT	0	0	0	0	0	0	0	0	0	0	0	0	0	0	0	0	0	0	0	0	0	0	0	0	0	0	0	0	0	0	0	0	0	0	0	0	0	0	0	0	0
NC_007530	1548295	TAAGGAATTT.AGGGAAGTAC	A	G	40	PASS	NA	GT	0	0	0	0	0	0	0	0	0	1	0	0	0	0	0	0	0	0	0	0	0	0	0	0	0	0	0	0	0	0	0	0	0	0	0	0	0	0	0	0	0
NC_007530	1548898	AGGCGATTAT.GAAAGCAAAC	G	A	40	PASS	NA	GT	0	0	0	0	0	0	0	0	0	0	0	0	0	0	0	0	0	0	0	0	0	0	0	0	0	0	0	0	0	0	0	0	0	0	0	0	0	0	0	0	0
NC_007530	1549031	TGTATTAACA.GCAGCATCAG	G	A	40	PASS	NA	GT	0	0	0	0	0	1	0	0	0	0	0	0	0	0	0	0	0	0	0	0	0	0	0	0	0	0	0	0	0	0	0	0	0	0	0	0	0	0	0	0	0
NC_007530	1550746	TAGAAATTAT.AGAAAATGAA	A	G	40	PASS	NA	GT	0	1	1	1	1	1	1	1	1	1	1	1	1	1	1	1	1	1	1	1	1	1	1	1	1	1	1	1	1	1	1	1	1	1	1	1	1	1	1	1	1
NC_007530	1550767	ATTTAATTGA.GCGATCTGCA	G	T	40	PASS	NA	GT	0	0	0	0	0	0	0	0	0	1	0	0	0	0	0	0	0	0	0	0	0	0	0	0	0	0	0	0	0	0	0	0	0	0	0	0	0	0	0	0	0
NC_007530	1551867	AGAACACTGG.AACGAACATA	A	N	40	N	NA	GT	0	0	0	0	0	0	0	0	0	0	0	0	0	0	0	0	0	0	0	0	0	0	0	0	1	0	0	0	0	0	0	0	0	0	0	0	0	0	0	0	0
NC_007530	1551868	GAACACTGGA.ACGAACATAG	A	N	40	N	NA	GT	0	0	0	0	0	0	0	0	0	0	0	0	0	0	0	0	0	0	0	0	0	0	0	0	1	0	0	0	0	0	0	0	0	0	0	0	0	0	0	0	0
NC_007530	1551869	AACACTGGAA.CGAACATAGC	C	N	40	N	NA	GT	0	0	0	0	0	0	0	0	0	0	0	0	0	0	0	0	0	0	0	0	0	0	0	0	1	0	0	0	0	0	0	0	0	0	0	0	0	0	0	0	0
NC_007530	1551870	ACACTGGAAC.GAACATAGCG	G	N	40	N	NA	GT	0	0	0	0	0	0	0	0	0	0	0	0	0	0	0	0	0	0	0	0	0	0	0	0	1	0	0	0	0	0	0	0	0	0	0	0	0	0	0	0	0
NC_007530	1551871	CACTGGAACG.AACATAGCGT	A	N	40	N	NA	GT	0	0	0	0	0	0	0	0	0	0	0	0	0	0	0	0	0	0	0	0	0	0	0	0	1	0	0	0	0	0	0	0	0	0	0	0	0	0	0	0	0
NC_007530	1551872	ACTGGAACGA.ACATAGCGTA	A	N	40	N	NA	GT	0	0	0	0	0	0	0	0	0	0	0	0	0	0	0	0	0	0	0	0	0	0	0	0	1	0	0	0	0	0	0	0	0	0	0	0	0	0	0	0	0
NC_007530	1551873	CTGGAACGAA.CATAGCGTAA	C	N	40	N	NA	GT	0	0	0	0	0	0	0	0	0	0	0	0	0	0	0	0	0	0	0	0	0	0	0	0	1	0	0	0	0	0	0	0	0	0	0	0	0	0	0	0	0
NC_007530	1551874	TGGAACGAAC.ATAGCGTAAG	A	N	40	N	NA	GT	0	0	0	0	0	0	0	0	0	0	0	0	0	0	0	0	0	0	0	0	0	0	0	0	1	0	0	0	0	0	0	0	0	0	0	0	0	0	0	0	0
NC_007530	1551875	GGAACGAACA.TAGCGTAAGC	T	N	40	N	NA	GT	0	0	0	0	0	0	0	0	0	0	0	0	0	0	0	0	0	0	0	0	0	0	0	0	1	0	0	0	0	0	0	0	0	0	0	0	0	0	0	0	0
NC_007530	1551876	GAACGAACAT.AGCGTAAGCG	A	N	40	N	NA	GT	0	0	0	0	0	0	0	0	0	0	0	0	0	0	0	0	0	0	0	0	0	0	0	0	1	0	0	0	0	0	0	0	0	0	0	0	0	0	0	0	0
NC_007530	1551877	AACGAACATA.GCGTAAGCGA	G	N	40	N	NA	GT	0	0	0	0	0	0	0	0	0	0	0	0	0	0	0	0	0	0	0	0	0	0	0	0	1	0	0	0	0	0	0	0	0	0	0	0	0	0	0	0	0
NC_007530	1551878	ACGAACATAG.CGTAAGCGAT	C	N	40	N	NA	GT	0	0	0	0	0	0	0	0	0	0	0	0	0	0	0	0	0	0	0	0	0	0	0	0	1	0	0	0	0	0	0	0	0	0	0	0	0	0	0	0	0
NC_007530	1551879	CGAACATAGC.GTAAGCGATT	G	N	40	N	NA	GT	0	0	0	0	0	0	0	0	0	0	0	0	0	0	0	0	0	0	0	0	0	0	0	0	1	0	0	0	0	0	0	0	0	0	0	0	0	0	0	0	0
NC_007530	1551880	GAACATAGCG.TAAGCGATTG	T	N	40	N	NA	GT	0	0	0	0	0	0	0	0	0	0	0	0	0	0	0	0	0	0	0	0	0	0	0	0	1	0	0	0	0	0	0	0	0	0	0	0	0	0	0	0	0
NC_007530	1551881	AACATAGCGT.AAGCGATTGG	A	N	40	N	NA	GT	0	0	0	0	0	0	0	0	0	0	0	0	0	0	0	0	0	0	0	0	0	0	0	0	1	0	0	0	0	0	0	0	0	0	0	0	0	0	0	0	0
NC_007530	1551882	ACATAGCGTA.AGCGATTGGT	A	N	40	N	NA	GT	0	0	0	0	0	0	0	0	0	0	0	0	0	0	0	0	0	0	0	0	0	0	0	0	1	0	0	0	0	0	0	0	0	0	0	0	0	0	0	0	0
NC_007530	1551883	CATAGCGTAA.GCGATTGGTT	G	N	40	N	NA	GT	0	0	0	0	0	0	0	0	0	0	0	0	0	0	0	0	0	0	0	0	0	0	0	0	1	0	0	0	0	0	0	0	0	0	0	0	0	0	0	0	0
NC_007530	1551884	ATAGCGTAAG.CGATTGGTTC	C	N	40	N	NA	GT	0	0	0	0	0	0	0	0	0	0	0	0	0	0	0	0	0	0	0	0	0	0	0	0	1	0	0	0	0	0	0	0	0	0	0	0	0	0	0	0	0
NC_007530	1551885	TAGCGTAAGC.GATTGGTTCT	G	N	40	N	NA	GT	0	0	0	0	0	0	0	0	0	0	0	0	0	0	0	0	0	0	0	0	0	0	0	0	1	0	0	0	0	0	0	0	0	0	0	0	0	0	0	0	0
NC_007530	1551886	AGCGTAAGCG.ATTGGTTCTA	A	N	40	N	NA	GT	0	0	0	0	0	0	0	0	0	0	0	0	0	0	0	0	0	0	0	0	0	0	0	0	1	0	0	0	0	0	0	0	0	0	0	0	0	0	0	0	0
NC_007530	1551887	GCGTAAGCGA.TTGGTTCTAC	T	N	40	N	NA	GT	0	0	0	0	0	0	0	0	0	0	0	0	0	0	0	0	0	0	0	0	0	0	0	0	1	0	0	0	0	0	0	0	0	0	0	0	0	0	0	0	0
NC_007530	1551888	CGTAAGCGAT.TGGTTCTACT	T	N	40	N	NA	GT	0	0	0	0	0	0	0	0	0	0	0	0	0	0	0	0	0	0	0	0	0	0	0	0	1	0	0	0	0	0	0	0	0	0	0	0	0	0	0	0	0
NC_007530	1551889	GTAAGCGATT.GGTTCTACTT	G	N	40	N	NA	GT	0	0	0	0	0	0	0	0	0	0	0	0	0	0	0	0	0	0	0	0	0	0	0	0	1	0	0	0	0	0	0	0	0	0	0	0	0	0	0	0	0
NC_007530	1551890	TAAGCGATTG.GTTCTACTTT	G	N	40	N	NA	GT	0	0	0	0	0	0	0	0	0	0	0	0	0	0	0	0	0	0	0	0	0	0	0	0	1	0	0	0	0	0	0	0	0	0	0	0	0	0	0	0	0
NC_007530	1551891	AAGCGATTGG.TTCTACTTTC	T	N	40	N	NA	GT	0	0	0	0	0	0	0	0	0	0	0	0	0	0	0	0	0	0	0	0	0	0	0	0	1	0	0	0	0	0	0	0	0	0	0	0	0	0	0	0	0
NC_007530	1551892	AGCGATTGGT.TCTACTTTCT	T	N	40	N	NA	GT	0	0	0	0	0	0	0	0	0	0	0	0	0	0	0	0	0	0	0	0	0	0	0	0	1	0	0	0	0	0	0	0	0	0	0	0	0	0	0	0	0
NC_007530	1551893	GCGATTGGTT.CTACTTTCTT	C	N	40	N	NA	GT	0	0	0	0	0	0	0	0	0	0	0	0	0	0	0	0	0	0	0	0	0	0	0	0	1	0	0	0	0	0	0	0	0	0	0	0	0	0	0	0	0
NC_007530	1551894	CGATTGGTTC.TACTTTCTTT	T	N	40	N	NA	GT	0	0	0	0	0	0	0	0	0	0	0	0	0	0	0	0	0	0	0	0	0	0	0	0	1	0	0	0	0	0	0	0	0	0	0	0	0	0	0	0	0
NC_007530	1551895	GATTGGTTCT.ACTTTCTTTT	A	N	40	N	NA	GT	0	0	0	0	0	0	0	0	0	0	0	0	0	0	0	0	0	0	0	0	0	0	0	0	1	0	0	0	0	0	0	0	0	0	0	0	0	0	0	0	0
NC_007530	1551896	ATTGGTTCTA.CTTTCTTTTC	C	N	40	N	NA	GT	0	0	0	0	0	0	0	0	0	0	0	0	0	0	0	0	0	0	0	0	0	0	0	0	1	0	0	0	0	0	0	0	0	0	0	0	0	0	0	0	0
NC_007530	1551897	TTGGTTCTAC.TTTCTTTTCT	T	N	40	N	NA	GT	0	0	0	0	0	0	0	0	0	0	0	0	0	0	0	0	0	0	0	0	0	0	0	0	1	0	0	0	0	0	0	0	0	0	0	0	0	0	0	0	0
NC_007530	1551898	TGGTTCTACT.TTCTTTTCTA	T	N	40	N	NA	GT	0	0	0	0	0	0	0	0	0	0	0	0	0	0	0	0	0	0	0	0	0	0	0	0	1	0	0	0	0	0	0	0	0	0	0	0	0	0	0	0	0
NC_007530	1551899	GGTTCTACTT.TCTTTTCTAC	T	N	40	N	NA	GT	0	0	0	0	0	0	0	0	0	0	0	0	0	0	0	0	0	0	0	0	0	0	0	0	1	0	0	0	0	0	0	0	0	0	0	0	0	0	0	0	0
NC_007530	1551900	GTTCTACTTT.CTTTTCTACT	C	N	40	N	NA	GT	0	0	0	0	0	0	0	0	0	0	0	0	0	0	0	0	0	0	0	0	0	0	0	0	1	0	0	0	0	0	0	0	0	0	0	0	0	0	0	0	0
NC_007530	1551901	TTCTACTTTC.TTTTCTACTT	T	N	40	N	NA	GT	0	0	0	0	0	0	0	0	0	0	0	0	0	0	0	0	0	0	0	0	0	0	0	0	1	0	0	0	0	0	0	0	0	0	0	0	0	0	0	0	0
NC_007530	1551902	TCTACTTTCT.TTTCTACTTC	T	N	40	N	NA	GT	0	0	0	0	0	0	0	0	0	0	0	0	0	0	0	0	0	0	0	0	0	0	0	0	1	0	0	0	0	0	0	0	0	0	0	0	0	0	0	0	0
NC_007530	1551903	CTACTTTCTT.TTCTACTTCA	T	N	40	N	NA	GT	0	0	0	0	0	0	0	0	0	0	0	0	0	0	0	0	0	0	0	0	0	0	0	0	1	0	0	0	0	0	0	0	0	0	0	0	0	0	0	0	0
NC_007530	1551904	TACTTTCTTT.TCTACTTCAT	T	N	40	N	NA	GT	0	0	0	0	0	0	0	0	0	0	0	0	0	0	0	0	0	0	0	0	0	0	0	0	1	0	0	0	0	0	0	0	0	0	0	0	0	0	0	0	0
NC_007530	1551905	ACTTTCTTTT.CTACTTCATG	C	N	40	N	NA	GT	0	0	0	0	0	0	0	0	0	0	0	0	0	0	0	0	0	0	0	0	0	0	0	0	1	0	0	0	0	0	0	0	0	0	0	0	0	0	0	0	0
NC_007530	1551906	CTTTCTTTTC.TACTTCATGT	T	N	40	N	NA	GT	0	0	0	0	0	0	0	0	0	0	0	0	0	0	0	0	0	0	0	0	0	0	0	0	1	0	0	0	0	0	0	0	0	0	0	0	0	0	0	0	0
NC_007530	1551907	TTTCTTTTCT.ACTTCATGTT	A	N	40	N	NA	GT	0	0	0	0	0	0	0	0	0	0	0	0	0	0	0	0	0	0	0	0	0	0	0	0	1	0	0	0	0	0	0	0	0	0	0	0	0	0	0	0	0
NC_007530	1551908	TTCTTTTCTA.CTTCATGTTT	C	N	40	N	NA	GT	0	0	0	0	0	0	0	0	0	0	0	0	0	0	0	0	0	0	0	0	0	0	0	0	1	0	0	0	0	0	0	0	0	0	0	0	0	0	0	0	0
NC_007530	1551909	TCTTTTCTAC.TTCATGTTTG	T	N	40	N	NA	GT	0	0	0	0	0	0	0	0	0	0	0	0	0	0	0	0	0	0	0	0	0	0	0	0	1	0	0	0	0	0	0	0	0	0	0	0	0	0	0	0	0
NC_007530	1551910	CTTTTCTACT.TCATGTTTGT	T	N	40	N	NA	GT	0	0	0	0	0	0	0	0	0	0	0	0	0	0	0	0	0	0	0	0	0	0	0	0	1	0	0	0	0	0	0	0	0	0	0	0	0	0	0	0	0
NC_007530	1551911	TTTTCTACTT.CATGTTTGTA	C	N	40	N	NA	GT	0	0	0	0	0	0	0	0	0	0	0	0	0	0	0	0	0	0	0	0	0	0	0	0	1	0	0	0	0	0	0	0	0	0	0	0	0	0	0	0	0
NC_007530	1551912	TTTCTACTTC.ATGTTTGTAG	A	N	40	N	NA	GT	0	0	0	0	0	0	0	0	0	0	0	0	0	0	0	0	0	0	0	0	0	0	0	0	1	0	0	0	0	0	0	0	0	0	0	0	0	0	0	0	0
NC_007530	1551913	TTCTACTTCA.TGTTTGTAGT	T	N	40	N	NA	GT	0	0	0	0	0	0	0	0	0	0	0	0	0	0	0	0	0	0	0	0	0	0	0	0	1	0	0	0	0	0	0	0	0	0	0	0	0	0	0	0	0
NC_007530	1551914	TCTACTTCAT.GTTTGTAGTT	G	N	40	N	NA	GT	0	0	0	0	0	0	0	0	0	0	0	0	0	0	0	0	0	0	0	0	0	0	0	0	1	0	0	0	0	0	0	0	0	0	0	0	0	0	0	0	0
NC_007530	1551915	CTACTTCATG.TTTGTAGTTC	T	N	40	N	NA	GT	0	0	0	0	0	0	0	0	0	0	0	0	0	0	0	0	0	0	0	0	0	0	0	0	1	0	0	0	0	0	0	0	0	0	0	0	0	0	0	0	0
NC_007530	1552750	TATGTAAAAC.CCATTAAACA	C	T	40	PASS	NA	GT	0	0	0	0	0	0	0	0	0	0	0	0	0	0	0	0	0	0	0	0	0	0	0	0	0	0	0	0	0	0	0	0	0	0	0	0	0	0	0	0	0
NC_007530	1553189	TACTTACAAG.AAAATAAAGA	A	C	40	PASS	NA	GT	0	0	0	0	0	0	0	0	1	0	0	0	0	0	0	0	0	0	0	0	0	0	0	0	0	0	0	0	0	0	0	0	0	0	0	0	0	0	0	0	0
NC_007530	1553204	AAAGAAAAAA.TTCGCGGATT	T	N	40	N	NA	GT	0	0	0	0	0	0	0	0	0	0	0	0	0	0	0	0	0	0	0	0	0	0	0	0	1	0	0	0	0	0	0	0	0	0	0	0	0	0	0	0	0
NC_007530	1553205	AAGAAAAAAT.TCGCGGATTA	T	N	40	N	NA	GT	0	0	0	0	0	0	0	0	0	0	0	0	0	0	0	0	0	0	0	0	0	0	0	0	1	0	0	0	0	0	0	0	0	0	0	0	0	0	0	0	0
NC_007530	1553206	AGAAAAAATT.CGCGGATTAG	C	N	40	N	NA	GT	0	0	0	0	0	0	0	0	0	0	0	0	0	0	0	0	0	0	0	0	0	0	0	0	1	0	0	0	0	0	0	0	0	0	0	0	0	0	0	0	0
NC_007530	1553207	GAAAAAATTC.GCGGATTAGT	G	N	40	N	NA	GT	0	0	0	0	0	0	0	0	0	0	0	0	0	0	0	0	0	0	0	0	0	0	0	0	1	0	0	0	0	0	0	0	0	0	0	0	0	0	0	0	0
NC_007530	1553208	AAAAAATTCG.CGGATTAGTA	C	N	40	N	NA	GT	0	0	0	0	0	0	0	0	0	0	0	0	0	0	0	0	0	0	0	0	0	0	0	0	1	0	0	0	0	0	0	0	0	0	0	0	0	0	0	0	0
NC_007530	1553209	AAAAATTCGC.GGATTAGTAG	G	N	40	N	NA	GT	0	0	0	0	0	0	0	0	0	0	0	0	0	0	0	0	0	0	0	0	0	0	0	0	1	0	0	0	0	0	0	0	0	0	0	0	0	0	0	0	0
NC_007530	1553210	AAAATTCGCG.GATTAGTAGT	G	N	40	N	NA	GT	0	0	0	0	0	0	0	0	0	0	0	0	0	0	0	0	0	0	0	0	0	0	0	0	1	0	0	0	0	0	0	0	0	0	0	0	0	0	0	0	0
NC_007530	1553211	AAATTCGCGG.ATTAGTAGTA	A	N	40	N	NA	GT	0	0	0	0	0	0	0	0	0	0	0	0	0	0	0	0	0	0	0	0	0	0	0	0	1	0	0	0	0	0	0	0	0	0	0	0	0	0	0	0	0
NC_007530	1553212	AATTCGCGGA.TTAGTAGTAA	T	N	40	N	NA	GT	0	0	0	0	0	0	0	0	0	0	0	0	0	0	0	0	0	0	0	0	0	0	0	0	1	0	0	0	0	0	0	0	0	0	0	0	0	0	0	0	0
NC_007530	1553213	ATTCGCGGAT.TAGTAGTAAC	T	N	40	N	NA	GT	0	0	0	0	0	0	0	0	0	0	0	0	0	0	0	0	0	0	0	0	0	0	0	0	1	0	0	0	0	0	0	0	0	0	0	0	0	0	0	0	0
NC_007530	1553214	TTCGCGGATT.AGTAGTAACG	A	N	40	N	NA	GT	0	0	0	0	0	0	0	0	0	0	0	0	0	0	0	0	0	0	0	0	0	0	0	0	1	0	0	0	0	0	0	0	0	0	0	0	0	0	0	0	0
NC_007530	1553215	TCGCGGATTA.GTAGTAACGC	G	N	40	N	NA	GT	0	0	0	0	0	0	0	0	0	0	0	0	0	0	0	0	0	0	0	0	0	0	0	0	1	0	0	0	0	0	0	0	0	0	0	0	0	0	0	0	0
NC_007530	1553216	CGCGGATTAG.TAGTAACGCA	T	N	40	N	NA	GT	0	0	0	0	0	0	0	0	0	0	0	0	0	0	0	0	0	0	0	0	0	0	0	0	1	0	0	0	0	0	0	0	0	0	0	0	0	0	0	0	0
NC_007530	1553217	GCGGATTAGT.AGTAACGCAT	A	N	40	N	NA	GT	0	0	0	0	0	0	0	0	0	0	0	0	0	0	0	0	0	0	0	0	0	0	0	0	1	0	0	0	0	0	0	0	0	0	0	0	0	0	0	0	0
NC_007530	1553218	CGGATTAGTA.GTAACGCATG	G	N	40	N	NA	GT	0	0	0	0	0	0	0	0	0	0	0	0	0	0	0	0	0	0	0	0	0	0	0	0	1	0	0	0	0	0	0	0	0	0	0	0	0	0	0	0	0
NC_007530	1553219	GGATTAGTAG.TAACGCATGG	T	N	40	N	NA	GT	0	0	0	0	0	0	0	0	0	0	0	0	0	0	0	0	0	0	0	0	0	0	0	0	1	0	0	0	0	0	0	0	0	0	0	0	0	0	0	0	0
NC_007530	1553220	GATTAGTAGT.AACGCATGGA	A	N	40	N	NA	GT	0	0	0	0	0	0	0	0	0	0	0	0	0	0	0	0	0	0	0	0	0	0	0	0	1	0	0	0	0	0	0	0	0	0	0	0	0	0	0	0	0
NC_007530	1553221	ATTAGTAGTA.ACGCATGGAC	A	N	40	N	NA	GT	0	0	0	0	0	0	0	0	0	0	0	0	0	0	0	0	0	0	0	0	0	0	0	0	1	0	0	0	0	0	0	0	0	0	0	0	0	0	0	0	0
NC_007530	1553222	TTAGTAGTAA.CGCATGGACA	C	N	40	N	NA	GT	0	0	0	0	0	0	0	0	0	0	0	0	0	0	0	0	0	0	0	0	0	0	0	0	1	0	0	0	0	0	0	0	0	0	0	0	0	0	0	0	0
NC_007530	1553223	TAGTAGTAAC.GCATGGACAT	G	N	40	N	NA	GT	0	0	0	0	0	0	0	0	0	0	0	0	0	0	0	0	0	0	0	0	0	0	0	0	1	0	0	0	0	0	0	0	0	0	0	0	0	0	0	0	0
NC_007530	1553224	AGTAGTAACG.CATGGACATG	C	N	40	N	NA	GT	0	0	0	0	0	0	0	0	0	0	0	0	0	0	0	0	0	0	0	0	0	0	0	0	1	0	0	0	0	0	0	0	0	0	0	0	0	0	0	0	0
NC_007530	1553225	GTAGTAACGC.ATGGACATGA	A	N	40	N	NA	GT	0	0	0	0	0	0	0	0	0	0	0	0	0	0	0	0	0	0	0	0	0	0	0	0	1	0	0	0	0	0	0	0	0	0	0	0	0	0	0	0	0
NC_007530	1553226	TAGTAACGCA.TGGACATGAA	T	N	40	N	NA	GT	0	0	0	0	0	0	0	0	0	0	0	0	0	0	0	0	0	0	0	0	0	0	0	0	1	0	0	0	0	0	0	0	0	0	0	0	0	0	0	0	0
NC_007530	1553227	AGTAACGCAT.GGACATGAAG	G	N	40	N	NA	GT	0	0	0	0	0	0	0	0	0	0	0	0	0	0	0	0	0	0	0	0	0	0	0	0	1	0	0	0	0	0	0	0	0	0	0	0	0	0	0	0	0
NC_007530	1553228	GTAACGCATG.GACATGAAGA	G	N	40	N	NA	GT	0	0	0	0	0	0	0	0	0	0	0	0	0	0	0	0	0	0	0	0	0	0	0	0	1	0	0	0	0	0	0	0	0	0	0	0	0	0	0	0	0
NC_007530	1553229	TAACGCATGG.ACATGAAGAT	A	N	40	N	NA	GT	0	0	0	0	0	0	0	0	0	0	0	0	0	0	0	0	0	0	0	0	0	0	0	0	1	0	0	0	0	0	0	0	0	0	0	0	0	0	0	0	0
NC_007530	1553230	AACGCATGGA.CATGAAGATC	C	N	40	N	NA	GT	0	0	0	0	0	0	0	0	0	0	0	0	0	0	0	0	0	0	0	0	0	0	0	0	1	0	0	0	0	0	0	0	0	0	0	0	0	0	0	0	0
NC_007530	1553231	ACGCATGGAC.ATGAAGATCA	A	N	40	N	NA	GT	0	0	0	0	0	0	0	0	0	0	0	0	0	0	0	0	0	0	0	0	0	0	0	0	1	0	0	0	0	0	0	0	0	0	0	0	0	0	0	0	0
NC_007530	1553232	CGCATGGACA.TGAAGATCAT	T	N	40	N	NA	GT	0	0	0	0	0	0	0	0	0	0	0	0	0	0	0	0	0	0	0	0	0	0	0	0	1	0	0	0	0	0	0	0	0	0	0	0	0	0	0	0	0
NC_007530	1553233	GCATGGACAT.GAAGATCATA	G	N	40	N	NA	GT	0	0	0	0	0	0	0	0	0	0	0	0	0	0	0	0	0	0	0	0	0	0	0	0	1	0	0	0	0	0	0	0	0	0	0	0	0	0	0	0	0
NC_007530	1553234	CATGGACATG.AAGATCATAT	A	N	40	N	NA	GT	0	0	0	0	0	0	0	0	0	0	0	0	0	0	0	0	0	0	0	0	0	0	0	0	1	0	0	0	0	0	0	0	0	0	0	0	0	0	0	0	0
NC_007530	1553235	ATGGACATGA.AGATCATATT	A	N	40	N	NA	GT	0	0	0	0	0	0	0	0	0	0	0	0	0	0	0	0	0	0	0	0	0	0	0	0	1	0	0	0	0	0	0	0	0	0	0	0	0	0	0	0	0
NC_007530	1553236	TGGACATGAA.GATCATATTG	G	N	40	N	NA	GT	0	0	0	0	0	0	0	0	0	0	0	0	0	0	0	0	0	0	0	0	0	0	0	0	1	0	0	0	0	0	0	0	0	0	0	0	0	0	0	0	0
NC_007530	1553237	GGACATGAAG.ATCATATTGG	A	N	40	N	NA	GT	0	0	0	0	0	0	0	0	0	0	0	0	0	0	0	0	0	0	0	0	0	0	0	0	1	0	0	0	0	0	0	0	0	0	0	0	0	0	0	0	0
NC_007530	1553238	GACATGAAGA.TCATATTGGC	T	N	40	N	NA	GT	0	0	0	0	0	0	0	0	0	0	0	0	0	0	0	0	0	0	0	0	0	0	0	0	1	0	0	0	0	0	0	0	0	0	0	0	0	0	0	0	0
NC_007530	1553239	ACATGAAGAT.CATATTGGCG	C	N	40	N	NA	GT	0	0	0	0	0	0	0	0	0	0	0	0	0	0	0	0	0	0	0	0	0	0	0	0	1	0	0	0	0	0	0	0	0	0	0	0	0	0	0	0	0
NC_007530	1553240	CATGAAGATC.ATATTGGCGG	A	N	40	N	NA	GT	0	0	0	0	0	0	0	0	0	0	0	0	0	0	0	0	0	0	0	0	0	0	0	0	1	0	0	0	0	0	0	0	0	0	0	0	0	0	0	0	0
NC_007530	1553241	ATGAAGATCA.TATTGGCGGA	T	N	40	N	NA	GT	0	0	0	0	0	0	0	0	0	0	0	0	0	0	0	0	0	0	0	0	0	0	0	0	1	0	0	0	0	0	0	0	0	0	0	0	0	0	0	0	0
NC_007530	1553242	TGAAGATCAT.ATTGGCGGAA	A	N	40	N	NA	GT	0	0	0	0	0	0	0	0	0	0	0	0	0	0	0	0	0	0	0	0	0	0	0	0	1	0	0	0	0	0	0	0	0	0	0	0	0	0	0	0	0
NC_007530	1555753	AAATAGTATG.GAAGTAACAG	G	A	40	PASS	NA	GT	0	0	0	0	0	0	0	0	0	1	0	0	0	0	0	0	0	0	0	0	0	0	0	0	0	0	0	0	0	0	0	0	0	0	0	0	0	0	0	0	0
NC_007530	1557565	AATAAAACGA.TTTAGTTTGT	T	C	40	PASS	NA	GT	0	0	0	0	0	0	0	0	1	0	0	0	0	0	0	0	0	0	0	0	0	0	0	0	0	0	0	0	0	0	0	0	0	0	0	0	0	0	0	0	0
NC_007530	1559054	ATTTGTCGGT.AAGTCGATAT	A	N	40	N	NA	GT	0	0	0	0	0	0	0	0	0	0	0	0	0	0	0	0	0	0	0	0	0	0	0	0	1	0	0	0	0	0	0	0	0	0	0	0	0	0	0	0	0
NC_007530	1559055	TTTGTCGGTA.AGTCGATATT	A	N	40	N	NA	GT	0	0	0	0	0	0	0	0	0	0	0	0	0	0	0	0	0	0	0	0	0	0	0	0	1	0	0	0	0	0	0	0	0	0	0	0	0	0	0	0	0
NC_007530	1559056	TTGTCGGTAA.GTCGATATTC	G	N	40	N	NA	GT	0	0	0	0	0	0	0	0	0	0	0	0	0	0	0	0	0	0	0	0	0	0	0	0	1	0	0	0	0	0	0	0	0	0	0	0	0	0	0	0	0
NC_007530	1559057	TGTCGGTAAG.TCGATATTCC	T	N	40	N	NA	GT	0	0	0	0	0	0	0	0	0	0	0	0	0	0	0	0	0	0	0	0	0	0	0	0	1	0	0	0	0	0	0	0	0	0	0	0	0	0	0	0	0
NC_007530	1559058	GTCGGTAAGT.CGATATTCCT	C	N	40	N	NA	GT	0	0	0	0	0	0	0	0	0	0	0	0	0	0	0	0	0	0	0	0	0	0	0	0	1	0	0	0	0	0	0	0	0	0	0	0	0	0	0	0	0
NC_007530	1559059	TCGGTAAGTC.GATATTCCTT	G	N	40	N	NA	GT	0	0	0	0	0	0	0	0	0	0	0	0	0	0	0	0	0	0	0	0	0	0	0	0	1	0	0	0	0	0	0	0	0	0	0	0	0	0	0	0	0
NC_007530	1559060	CGGTAAGTCG.ATATTCCTTG	A	N	40	N	NA	GT	0	0	0	0	0	0	0	0	0	0	0	0	0	0	0	0	0	0	0	0	0	0	0	0	1	0	0	0	0	0	0	0	0	0	0	0	0	0	0	0	0
NC_007530	1559061	GGTAAGTCGA.TATTCCTTGT	T	N	40	N	NA	GT	0	0	0	0	0	0	0	0	0	0	0	0	0	0	0	0	0	0	0	0	0	0	0	0	1	0	0	0	0	0	0	0	0	0	0	0	0	0	0	0	0
NC_007530	1559062	GTAAGTCGAT.ATTCCTTGTC	A	N	40	N	NA	GT	0	0	0	0	0	0	0	0	0	0	0	0	0	0	0	0	0	0	0	0	0	0	0	0	1	0	0	0	0	0	0	0	0	0	0	0	0	0	0	0	0
NC_007530	1559063	TAAGTCGATA.TTCCTTGTCG	T	N	40	N	NA	GT	0	0	0	0	0	0	0	0	0	0	0	0	0	0	0	0	0	0	0	0	0	0	0	0	1	0	0	0	0	0	0	0	0	0	0	0	0	0	0	0	0
NC_007530	1559064	AAGTCGATAT.TCCTTGTCGA	T	N	40	N	NA	GT	0	0	0	0	0	0	0	0	0	0	0	0	0	0	0	0	0	0	0	0	0	0	0	0	1	0	0	0	0	0	0	0	0	0	0	0	0	0	0	0	0
NC_007530	1559065	AGTCGATATT.CCTTGTCGAA	C	N	40	N	NA	GT	0	0	0	0	0	0	0	0	0	0	0	0	0	0	0	0	0	0	0	0	0	0	0	0	1	0	0	0	0	0	0	0	0	0	0	0	0	0	0	0	0
NC_007530	1559066	GTCGATATTC.CTTGTCGAAT	C	N	40	N	NA	GT	0	0	0	0	0	0	0	0	0	0	0	0	0	0	0	0	0	0	0	0	0	0	0	0	1	0	0	0	0	0	0	0	0	0	0	0	0	0	0	0	0
NC_007530	1559067	TCGATATTCC.TTGTCGAATC	T	N	40	N	NA	GT	0	0	0	0	0	0	0	0	0	0	0	0	0	0	0	0	0	0	0	0	0	0	0	0	1	0	0	0	0	0	0	0	0	0	0	0	0	0	0	0	0
NC_007530	1559068	CGATATTCCT.TGTCGAATCG	T	N	40	N	NA	GT	0	0	0	0	0	0	0	0	0	0	0	0	0	0	0	0	0	0	0	0	0	0	0	0	1	0	0	0	0	0	0	0	0	0	0	0	0	0	0	0	0
NC_007530	1559069	GATATTCCTT.GTCGAATCGA	G	N	40	N	NA	GT	0	0	0	0	0	0	0	0	0	0	0	0	0	0	0	0	0	0	0	0	0	0	0	0	1	0	0	0	0	0	0	0	0	0	0	0	0	0	0	0	0
NC_007530	1559070	ATATTCCTTG.TCGAATCGAC	T	N	40	N	NA	GT	0	0	0	0	0	0	0	0	0	0	0	0	0	0	0	0	0	0	0	0	0	0	0	0	1	0	0	0	0	0	0	0	0	0	0	0	0	0	0	0	0
NC_007530	1559071	TATTCCTTGT.CGAATCGACG	C	N	40	N	NA	GT	0	0	0	0	0	0	0	0	0	0	0	0	0	0	0	0	0	0	0	0	0	0	0	0	1	0	0	0	0	0	0	0	0	0	0	0	0	0	0	0	0
NC_007530	1559072	ATTCCTTGTC.GAATCGACGA	G	N	40	N	NA	GT	0	0	0	0	0	0	0	0	0	0	0	0	0	0	0	0	0	0	0	0	0	0	0	0	1	0	0	0	0	0	0	0	0	0	0	0	0	0	0	0	0
NC_007530	1559073	TTCCTTGTCG.AATCGACGAT	A	N	40	N	NA	GT	0	0	0	0	0	0	0	0	0	0	0	0	0	0	0	0	0	0	0	0	0	0	0	0	1	0	0	0	0	0	0	0	0	0	0	0	0	0	0	0	0
NC_007530	1559074	TCCTTGTCGA.ATCGACGATA	A	N	40	N	NA	GT	0	0	0	0	0	0	0	0	0	0	0	0	0	0	0	0	0	0	0	0	0	0	0	0	1	0	0	0	0	0	0	0	0	0	0	0	0	0	0	0	0
NC_007530	1559075	CCTTGTCGAA.TCGACGATAT	T	N	40	N	NA	GT	0	0	0	0	0	0	0	0	0	0	0	0	0	0	0	0	0	0	0	0	0	0	0	0	1	0	0	0	0	0	0	0	0	0	0	0	0	0	0	0	0
NC_007530	1559076	CTTGTCGAAT.CGACGATATA	C	N	40	N	NA	GT	0	0	0	0	0	0	0	0	0	0	0	0	0	0	0	0	0	0	0	0	0	0	0	0	1	0	0	0	0	0	0	0	0	0	0	0	0	0	0	0	0
NC_007530	1559077	TTGTCGAATC.GACGATATAT	G	N	40	N	NA	GT	0	0	0	0	0	0	0	0	0	0	0	0	0	0	0	0	0	0	0	0	0	0	0	0	1	0	0	0	0	0	0	0	0	0	0	0	0	0	0	0	0
NC_007530	1559078	TGTCGAATCG.ACGATATATT	A	N	40	N	NA	GT	0	0	0	0	0	0	0	0	0	0	0	0	0	0	0	0	0	0	0	0	0	0	0	0	1	0	0	0	0	0	0	0	0	0	0	0	0	0	0	0	0
NC_007530	1559079	GTCGAATCGA.CGATATATTC	C	N	40	N	NA	GT	0	0	0	0	0	0	0	0	0	0	0	0	0	0	0	0	0	0	0	0	0	0	0	0	1	0	0	0	0	0	0	0	0	0	0	0	0	0	0	0	0
NC_007530	1559080	TCGAATCGAC.GATATATTCG	G	N	40	N	NA	GT	0	0	0	0	0	0	0	0	0	0	0	0	0	0	0	0	0	0	0	0	0	0	0	0	1	0	0	0	0	0	0	0	0	0	0	0	0	0	0	0	0
NC_007530	1559081	CGAATCGACG.ATATATTCGA	A	N	40	N	NA	GT	0	0	0	0	0	0	0	0	0	0	0	0	0	0	0	0	0	0	0	0	0	0	0	0	1	0	0	0	0	0	0	0	0	0	0	0	0	0	0	0	0
NC_007530	1559082	GAATCGACGA.TATATTCGAA	T	N	40	N	NA	GT	0	0	0	0	0	0	0	0	0	0	0	0	0	0	0	0	0	0	0	0	0	0	0	0	1	0	0	0	0	0	0	0	0	0	0	0	0	0	0	0	0
NC_007530	1559083	AATCGACGAT.ATATTCGAAA	A	N	40	N	NA	GT	0	0	0	0	0	0	0	0	0	0	0	0	0	0	0	0	0	0	0	0	0	0	0	0	1	0	0	0	0	0	0	0	0	0	0	0	0	0	0	0	0
NC_007530	1559084	ATCGACGATA.TATTCGAAAA	T	N	40	N	NA	GT	0	0	0	0	0	0	0	0	0	0	0	0	0	0	0	0	0	0	0	0	0	0	0	0	1	0	0	0	0	0	0	0	0	0	0	0	0	0	0	0	0
NC_007530	1559085	TCGACGATAT.ATTCGAAAAA	A	N	40	N	NA	GT	0	0	0	0	0	0	0	0	0	0	0	0	0	0	0	0	0	0	0	0	0	0	0	0	1	0	0	0	0	0	0	0	0	0	0	0	0	0	0	0	0
NC_007530	1559086	CGACGATATA.TTCGAAAAAT	T	N	40	N	NA	GT	0	0	0	0	0	0	0	0	0	0	0	0	0	0	0	0	0	0	0	0	0	0	0	0	1	0	0	0	0	0	0	0	0	0	0	0	0	0	0	0	0
NC_007530	1559087	GACGATATAT.TCGAAAAATC	T	N	40	N	NA	GT	0	0	0	0	0	0	0	0	0	0	0	0	0	0	0	0	0	0	0	0	0	0	0	0	1	0	0	0	0	0	0	0	0	0	0	0	0	0	0	0	0
NC_007530	1559088	ACGATATATT.CGAAAAATCG	C	N	40	N	NA	GT	0	0	0	0	0	0	0	0	0	0	0	0	0	0	0	0	0	0	0	0	0	0	0	0	1	0	0	0	0	0	0	0	0	0	0	0	0	0	0	0	0
NC_007530	1559089	CGATATATTC.GAAAAATCGT	G	N	40	N	NA	GT	0	0	0	0	0	0	0	0	0	0	0	0	0	0	0	0	0	0	0	0	0	0	0	0	1	0	0	0	0	0	0	0	0	0	0	0	0	0	0	0	0
NC_007530	1559090	GATATATTCG.AAAAATCGTT	A	N	40	N	NA	GT	0	0	0	0	0	0	0	0	0	0	0	0	0	0	0	0	0	0	0	0	0	0	0	0	1	0	0	0	0	0	0	0	0	0	0	0	0	0	0	0	0
NC_007530	1559091	ATATATTCGA.AAAATCGTTG	A	N	40	N	NA	GT	0	0	0	0	0	0	0	0	0	0	0	0	0	0	0	0	0	0	0	0	0	0	0	0	1	0	0	0	0	0	0	0	0	0	0	0	0	0	0	0	0
NC_007530	1559092	TATATTCGAA.AAATCGTTGA	A	N	40	N	NA	GT	0	0	0	0	0	0	0	0	0	0	0	0	0	0	0	0	0	0	0	0	0	0	0	0	1	0	0	0	0	0	0	0	0	0	0	0	0	0	0	0	0
NC_007530	1559093	ATATTCGAAA.AATCGTTGAT	A	N	40	N	NA	GT	0	0	0	0	0	0	0	0	0	0	0	0	0	0	0	0	0	0	0	0	0	0	0	0	1	0	0	0	0	0	0	0	0	0	0	0	0	0	0	0	0
NC_007530	1559094	TATTCGAAAA.ATCGTTGATA	A	N	40	N	NA	GT	0	0	0	0	0	0	0	0	0	0	0	0	0	0	0	0	0	0	0	0	0	0	0	0	1	0	0	0	0	0	0	0	0	0	0	0	0	0	0	0	0
NC_007530	1559095	ATTCGAAAAA.TCGTTGATAT	T	N	40	N	NA	GT	0	0	0	0	0	0	0	0	0	0	0	0	0	0	0	0	0	0	0	0	0	0	0	0	1	0	0	0	0	0	0	0	0	0	0	0	0	0	0	0	0
NC_007530	1559096	TTCGAAAAAT.CGTTGATATA	C	N	40	N	NA	GT	0	0	0	0	0	0	0	0	0	0	0	0	0	0	0	0	0	0	0	0	0	0	0	0	1	0	0	0	0	0	0	0	0	0	0	0	0	0	0	0	0
NC_007530	1559097	TCGAAAAATC.GTTGATATAG	G	N	40	N	NA	GT	0	0	0	0	0	0	0	0	0	0	0	0	0	0	0	0	0	0	0	0	0	0	0	0	1	0	0	0	0	0	0	0	0	0	0	0	0	0	0	0	0
NC_007530	1559098	CGAAAAATCG.TTGATATAGT	T	N	40	N	NA	GT	0	0	0	0	0	0	0	0	0	0	0	0	0	0	0	0	0	0	0	0	0	0	0	0	1	0	0	0	0	0	0	0	0	0	0	0	0	0	0	0	0
NC_007530	1559099	GAAAAATCGT.TGATATAGTG	T	N	40	N	NA	GT	0	0	0	0	0	0	0	0	0	0	0	0	0	0	0	0	0	0	0	0	0	0	0	0	1	0	0	0	0	0	0	0	0	0	0	0	0	0	0	0	0
NC_007530	1559100	AAAAATCGTT.GATATAGTGT	G	N	40	N	NA	GT	0	0	0	0	0	0	0	0	0	0	0	0	0	0	0	0	0	0	0	0	0	0	0	0	1	0	0	0	0	0	0	0	0	0	0	0	0	0	0	0	0
NC_007530	1559101	AAAATCGTTG.ATATAGTGTA	A	N	40	N	NA	GT	0	0	0	0	0	0	0	0	0	0	0	0	0	0	0	0	0	0	0	0	0	0	0	0	1	0	0	0	0	0	0	0	0	0	0	0	0	0	0	0	0
NC_007530	1559102	AAATCGTTGA.TATAGTGTAA	T	N	40	N	NA	GT	0	0	0	0	0	0	0	0	0	0	0	0	0	0	0	0	0	0	0	0	0	0	0	0	1	0	0	0	0	0	0	0	0	0	0	0	0	0	0	0	0
NC_007530	1559103	AATCGTTGAT.ATAGTGTAAG	A	N	40	N	NA	GT	0	0	0	0	0	0	0	0	0	0	0	0	0	0	0	0	0	0	0	0	0	0	0	0	1	0	0	0	0	0	0	0	0	0	0	0	0	0	0	0	0
NC_007530	1559104	ATCGTTGATA.TAGTGTAAGG	T	N	40	N	NA	GT	0	0	0	0	0	0	0	0	0	0	0	0	0	0	0	0	0	0	0	0	0	0	0	0	1	0	0	0	0	0	0	0	0	0	0	0	0	0	0	0	0
NC_007530	1559105	TCGTTGATAT.AGTGTAAGGA	A	N	40	N	NA	GT	0	0	0	0	0	0	0	0	0	0	0	0	0	0	0	0	0	0	0	0	0	0	0	0	1	0	0	0	0	0	0	0	0	0	0	0	0	0	0	0	0
NC_007530	1559106	CGTTGATATA.GTGTAAGGAA	G	N	40	N	NA	GT	0	0	0	0	0	0	0	0	0	0	0	0	0	0	0	0	0	0	0	0	0	0	0	0	1	0	0	0	0	0	0	0	0	0	0	0	0	0	0	0	0
NC_007530	1559107	GTTGATATAG.TGTAAGGAAT	T	N	40	N	NA	GT	0	0	0	0	0	0	0	0	0	0	0	0	0	0	0	0	0	0	0	0	0	0	0	0	1	0	0	0	0	0	0	0	0	0	0	0	0	0	0	0	0
NC_007530	1559108	TTGATATAGT.GTAAGGAATC	G	N	40	N	NA	GT	0	0	0	0	0	0	0	0	0	0	0	0	0	0	0	0	0	0	0	0	0	0	0	0	1	0	0	0	0	0	0	0	0	0	0	0	0	0	0	0	0
NC_007530	1559109	TGATATAGTG.TAAGGAATCG	T	N	40	N	NA	GT	0	0	0	0	0	0	0	0	0	0	0	0	0	0	0	0	0	0	0	0	0	0	0	0	1	0	0	0	0	0	0	0	0	0	0	0	0	0	0	0	0
NC_007530	1559110	GATATAGTGT.AAGGAATCGT	A	N	40	N	NA	GT	0	0	0	0	0	0	0	0	0	0	0	0	0	0	0	0	0	0	0	0	0	0	0	0	1	0	0	0	0	0	0	0	0	0	0	0	0	0	0	0	0
NC_007530	1559111	ATATAGTGTA.AGGAATCGTT	A	N	40	N	NA	GT	0	0	0	0	0	0	0	0	0	0	0	0	0	0	0	0	0	0	0	0	0	0	0	0	1	0	0	0	0	0	0	0	0	0	0	0	0	0	0	0	0
NC_007530	1559112	TATAGTGTAA.GGAATCGTTG	G	N	40	N	NA	GT	0	0	0	0	0	0	0	0	0	0	0	0	0	0	0	0	0	0	0	0	0	0	0	0	1	0	0	0	0	0	0	0	0	0	0	0	0	0	0	0	0
NC_007530	1559113	ATAGTGTAAG.GAATCGTTGA	G	N	40	N	NA	GT	0	0	0	0	0	0	0	0	0	0	0	0	0	0	0	0	0	0	0	0	0	0	0	0	1	0	0	0	0	0	0	0	0	0	0	0	0	0	0	0	0
NC_007530	1559114	TAGTGTAAGG.AATCGTTGAT	A	N	40	N	NA	GT	0	0	0	0	0	0	0	0	0	0	0	0	0	0	0	0	0	0	0	0	0	0	0	0	1	0	0	0	0	0	0	0	0	0	0	0	0	0	0	0	0
NC_007530	1559115	AGTGTAAGGA.ATCGTTGATA	A	N	40	N	NA	GT	0	0	0	0	0	0	0	0	0	0	0	0	0	0	0	0	0	0	0	0	0	0	0	0	1	0	0	0	0	0	0	0	0	0	0	0	0	0	0	0	0
NC_007530	1559116	GTGTAAGGAA.TCGTTGATAT	T	N	40	N	NA	GT	0	0	0	0	0	0	0	0	0	0	0	0	0	0	0	0	0	0	0	0	0	0	0	0	1	0	0	0	0	0	0	0	0	0	0	0	0	0	0	0	0
NC_007530	1559117	TGTAAGGAAT.CGTTGATATA	C	N	40	N	NA	GT	0	0	0	0	0	0	0	0	0	0	0	0	0	0	0	0	0	0	0	0	0	0	0	0	1	0	0	0	0	0	0	0	0	0	0	0	0	0	0	0	0
NC_007530	1559118	GTAAGGAATC.GTTGATATAT	G	N	40	N	NA	GT	0	0	0	0	0	0	0	0	0	0	0	0	0	0	0	0	0	0	0	0	0	0	0	0	1	0	0	0	0	0	0	0	0	0	0	0	0	0	0	0	0
NC_007530	1559119	TAAGGAATCG.TTGATATATT	T	N	40	N	NA	GT	0	0	0	0	0	0	0	0	0	0	0	0	0	0	0	0	0	0	0	0	0	0	0	0	1	0	0	0	0	0	0	0	0	0	0	0	0	0	0	0	0
NC_007530	1559120	AAGGAATCGT.TGATATATTT	T	N	40	N	NA	GT	0	0	0	0	0	0	0	0	0	0	0	0	0	0	0	0	0	0	0	0	0	0	0	0	1	0	0	0	0	0	0	0	0	0	0	0	0	0	0	0	0
NC_007530	1559121	AGGAATCGTT.GATATATTTA	G	N	40	N	NA	GT	0	0	0	0	0	0	0	0	0	0	0	0	0	0	0	0	0	0	0	0	0	0	0	0	1	0	0	0	0	0	0	0	0	0	0	0	0	0	0	0	0
NC_007530	1559122	GGAATCGTTG.ATATATTTAA	A	N	40	N	NA	GT	0	0	0	0	0	0	0	0	0	0	0	0	0	0	0	0	0	0	0	0	0	0	0	0	1	0	0	0	0	0	0	0	0	0	0	0	0	0	0	0	0
NC_007530	1559123	GAATCGTTGA.TATATTTAAA	T	N	40	N	NA	GT	0	0	0	0	0	0	0	0	0	0	0	0	0	0	0	0	0	0	0	0	0	0	0	0	1	0	0	0	0	0	0	0	0	0	0	0	0	0	0	0	0
NC_007530	1559124	AATCGTTGAT.ATATTTAAAT	A	N	40	N	NA	GT	0	0	0	0	0	0	0	0	0	0	0	0	0	0	0	0	0	0	0	0	0	0	0	0	1	0	0	0	0	0	0	0	0	0	0	0	0	0	0	0	0
NC_007530	1559125	ATCGTTGATA.TATTTAAATT	T	N	40	N	NA	GT	0	0	0	0	0	0	0	0	0	0	0	0	0	0	0	0	0	0	0	0	0	0	0	0	1	0	0	0	0	0	0	0	0	0	0	0	0	0	0	0	0
NC_007530	1559126	TCGTTGATAT.ATTTAAATTA	A	N	40	N	NA	GT	0	0	0	0	0	0	0	0	0	0	0	0	0	0	0	0	0	0	0	0	0	0	0	0	1	0	0	0	0	0	0	0	0	0	0	0	0	0	0	0	0
NC_007530	1559127	CGTTGATATA.TTTAAATTAT	T	N	40	N	NA	GT	0	0	0	0	0	0	0	0	0	0	0	0	0	0	0	0	0	0	0	0	0	0	0	0	1	0	0	0	0	0	0	0	0	0	0	0	0	0	0	0	0
NC_007530	1559128	GTTGATATAT.TTAAATTATC	T	N	40	N	NA	GT	0	0	0	0	0	0	0	0	0	0	0	0	0	0	0	0	0	0	0	0	0	0	0	0	1	0	0	0	0	0	0	0	0	0	0	0	0	0	0	0	0
NC_007530	1559129	TTGATATATT.TAAATTATCG	T	N	40	N	NA	GT	0	0	0	0	0	0	0	0	0	0	0	0	0	0	0	0	0	0	0	0	0	0	0	0	1	0	0	0	0	0	0	0	0	0	0	0	0	0	0	0	0
NC_007530	1559130	TGATATATTT.AAATTATCGT	A	N	40	N	NA	GT	0	0	0	0	0	0	0	0	0	0	0	0	0	0	0	0	0	0	0	0	0	0	0	0	1	0	0	0	0	0	0	0	0	0	0	0	0	0	0	0	0
NC_007530	1559131	GATATATTTA.AATTATCGTC	A	N	40	N	NA	GT	0	0	0	0	0	0	0	0	0	0	0	0	0	0	0	0	0	0	0	0	0	0	0	0	1	0	0	0	0	0	0	0	0	0	0	0	0	0	0	0	0
NC_007530	1559132	ATATATTTAA.ATTATCGTCG	A	N	40	N	NA	GT	0	0	0	0	0	0	0	0	0	0	0	0	0	0	0	0	0	0	0	0	0	0	0	0	1	0	0	0	0	0	0	0	0	0	0	0	0	0	0	0	0
NC_007530	1559133	TATATTTAAA.TTATCGTCGA	T	N	40	N	NA	GT	0	0	0	0	0	0	0	0	0	0	0	0	0	0	0	0	0	0	0	0	0	0	0	0	1	0	0	0	0	0	0	0	0	0	0	0	0	0	0	0	0
NC_007530	1559134	ATATTTAAAT.TATCGTCGAT	T	N	40	N	NA	GT	0	0	0	0	0	0	0	0	0	0	0	0	0	0	0	0	0	0	0	0	0	0	0	0	1	0	0	0	0	0	0	0	0	0	0	0	0	0	0	0	0
NC_007530	1559135	TATTTAAATT.ATCGTCGATA	A	N	40	N	NA	GT	0	0	0	0	0	0	0	0	0	0	0	0	0	0	0	0	0	0	0	0	0	0	0	0	1	0	0	0	0	0	0	0	0	0	0	0	0	0	0	0	0
NC_007530	1559136	ATTTAAATTA.TCGTCGATAT	T	N	40	N	NA	GT	0	0	0	0	0	0	0	0	0	0	0	0	0	0	0	0	0	0	0	0	0	0	0	0	1	0	0	0	0	0	0	0	0	0	0	0	0	0	0	0	0
NC_007530	1559137	TTTAAATTAT.CGTCGATATA	C	N	40	N	NA	GT	0	0	0	0	0	0	0	0	0	0	0	0	0	0	0	0	0	0	0	0	0	0	0	0	1	0	0	0	0	0	0	0	0	0	0	0	0	0	0	0	0
NC_007530	1559138	TTAAATTATC.GTCGATATAA	G	N	40	N	NA	GT	0	0	0	0	0	0	0	0	0	0	0	0	0	0	0	0	0	0	0	0	0	0	0	0	1	0	0	0	0	0	0	0	0	0	0	0	0	0	0	0	0
NC_007530	1559139	TAAATTATCG.TCGATATAAT	T	N	40	N	NA	GT	0	0	0	0	0	0	0	0	0	0	0	0	0	0	0	0	0	0	0	0	0	0	0	0	1	0	0	0	0	0	0	0	0	0	0	0	0	0	0	0	0
NC_007530	1559140	AAATTATCGT.CGATATAATT	C	N	40	N	NA	GT	0	0	0	0	0	0	0	0	0	0	0	0	0	0	0	0	0	0	0	0	0	0	0	0	1	0	0	0	0	0	0	0	0	0	0	0	0	0	0	0	0
NC_007530	1559141	AATTATCGTC.GATATAATTT	G	N	40	N	NA	GT	0	0	0	0	0	0	0	0	0	0	0	0	0	0	0	0	0	0	0	0	0	0	0	0	1	0	0	0	0	0	0	0	0	0	0	0	0	0	0	0	0
NC_007530	1559342	AAAGAAGAGT.CCATTCCGAA	C	G	40	PASS	NA	GT	0	0	0	0	0	0	0	0	1	0	0	0	0	0	0	0	0	0	0	0	0	0	0	0	0	0	0	0	0	0	0	0	0	0	0	0	0	0	0	0	0
NC_007530	1560158	AATTTGAAAT.AATAACAGCA	A	T	40	PASS	NA	GT	0	0	0	0	0	0	0	0	0	0	0	0	0	1	0	0	0	0	0	0	0	0	0	0	0	0	0	0	0	0	0	0	0	0	0	0	0	0	0	0	0
NC_007530	1560342	ACATGAGCAA.AATAAATGGA	A	T	40	PASS	NA	GT	0	0	0	0	0	0	0	0	0	1	0	0	0	0	0	0	0	0	0	0	0	0	0	0	0	0	0	0	0	0	0	0	0	0	0	0	0	0	0	0	0
NC_007530	1560373	TGTGCAGGAA.CATCTTTACT	C	G	40	PASS	NA	GT	0	0	0	0	0	0	0	0	0	1	0	0	0	0	0	0	0	0	0	0	0	0	0	0	0	0	0	0	0	0	0	0	0	0	0	0	0	0	0	0	0
NC_007530	1560779	CAAATGCAAA.TTGTCAATAA	T	C	40	PASS	NA	GT	0	1	1	1	1	1	1	1	1	1	1	1	1	1	1	1	1	1	1	1	1	1	1	1	1	1	1	1	1	1	1	1	1	1	1	1	1	1	1	1	1
NC_007530	1560824	AAGAATATAC.GTAAATATTT	G	A	40	PASS	NA	GT	0	0	0	0	0	0	0	0	0	1	0	0	0	0	0	0	0	0	0	0	0	0	0	0	0	0	0	0	0	0	0	0	0	0	0	0	0	0	0	0	0
NC_007530	1561825	CTATCAATAC.GTCCTATCAT	G	C	40	PASS	NA	GT	0	0	0	0	0	0	0	0	1	0	0	0	0	0	0	0	0	0	0	0	0	0	0	0	0	0	0	0	0	0	0	0	0	0	0	0	0	0	0	0	0
NC_007530	1562404	CCAGCAAGAG.CTGGACCGAT	C	A	40	PASS	NA	GT	0	0	0	0	0	0	0	0	0	0	0	0	0	0	0	0	0	0	0	0	0	0	0	0	0	0	0	0	0	0	0	0	0	0	0	0	0	0	0	0	0
NC_007530	1562939	CGTAATAAAA.CTTGTGTAAC	C	A	40	PASS	NA	GT	0	0	1	0	0	0	0	0	0	0	0	0	0	0	0	0	0	0	0	0	0	0	0	0	0	0	0	0	0	0	0	0	0	0	0	0	0	0	0	0	0
NC_007530	1563412	ATAAAAATAG.CATGTACATA	C	A	40	PASS	NA	GT	0	0	0	0	0	0	0	0	0	0	0	0	0	0	0	0	0	0	0	0	0	0	0	0	0	0	0	0	0	0	0	0	0	0	0	0	0	0	0	0	0
NC_007530	1563529	AAACTACCAA.TCATTTGAGG	T	G	40	PASS	NA	GT	0	0	0	0	0	0	0	0	0	0	0	0	0	0	0	0	1	0	0	0	0	0	0	0	0	0	0	0	0	0	0	0	0	0	0	0	0	0	0	0	0
NC_007530	1563779	CTTGTAGGAA.GCAGGCCCAG	G	T	40	PASS	NA	GT	0	0	0	0	0	0	0	0	0	1	0	0	0	0	0	0	0	0	0	0	0	0	0	0	0	0	0	0	0	0	0	0	0	0	0	0	0	0	0	0	0
NC_007530	1565227	TATGAAAAAA.CAGCTCAAAT	C	A	40	PASS	NA	GT	0	0	0	0	0	0	0	0	0	0	0	0	0	0	0	0	0	0	0	0	0	0	0	0	0	0	0	0	0	0	0	0	0	0	0	0	0	0	0	0	0
NC_007530	1565228	ATGAAAAAAC.AGCTCAAATA	A	T	40	PASS	NA	GT	0	0	0	0	0	0	0	0	0	0	0	0	0	0	0	0	0	0	0	0	0	0	0	0	0	0	0	0	0	0	0	0	0	0	0	0	0	0	0	0	0
NC_007530	1565237	CAGCTCAAAT.ATGAGCTGTT	A	C	40	PASS	NA	GT	0	0	0	0	0	0	0	0	0	0	0	0	0	0	0	0	0	0	0	0	0	0	0	0	0	0	0	0	0	0	0	0	0	0	0	0	0	0	0	0	0
NC_007530	1565372	AGCAAATCCA.CCGCCGAAAC	C	A	40	PASS	NA	GT	0	0	1	0	0	0	0	0	0	0	0	0	0	0	0	0	0	0	0	0	0	0	0	0	0	0	0	0	0	0	0	0	0	0	0	0	0	0	0	0	0
NC_007530	1570190	AGATTTAGGG.GAAAAAATCG	G	A	40	PASS	NA	GT	0	1	1	1	1	1	1	1	1	1	1	1	1	1	1	1	1	1	1	1	1	1	1	1	1	1	1	1	1	1	1	1	1	1	1	1	1	1	1	1	1
NC_007530	1570595	AGTGAAACAT.ACAATTCATA	A	G	40	PASS	NA	GT	0	0	0	0	0	0	0	0	0	0	0	0	0	0	0	0	0	0	0	0	0	0	0	0	1	1	0	1	0	0	0	0	0	0	0	0	0	0	0	0	0
NC_007530	1571806	GATTGTTAAA.GTATCGTTTG	G	T	40	PASS	NA	GT	0	0	1	0	0	0	0	0	0	0	0	0	0	0	0	0	0	0	0	0	0	0	0	0	0	0	0	0	0	0	0	0	0	0	0	0	0	0	0	0	0
NC_007530	1572065	GTATTGTCAA.CGCTTTTAAA	C	A	40	PASS	NA	GT	0	0	0	0	0	0	0	0	0	0	0	0	0	0	0	0	0	0	0	0	0	0	0	0	0	0	0	0	0	0	0	0	0	0	0	0	0	0	0	0	0
NC_007530	1572965	TTCTAATGAG.TTGGTTATGC	T	C	40	PASS	NA	GT	0	1	1	1	1	1	1	1	1	1	1	1	1	1	1	1	1	1	1	1	1	1	1	1	1	1	1	1	1	1	1	1	1	1	1	1	1	1	1	1	1
NC_007530	1573185	TCAAGGGGTT.ATTACAGTAA	A	G	40	PASS	NA	GT	0	0	0	0	0	0	0	0	0	1	0	0	0	0	0	0	0	0	0	0	0	0	0	0	0	0	0	0	0	0	0	0	0	0	0	0	0	0	0	0	0
NC_007530	1576294	ATGTAAATTT.TATGTTTGTG	T	C	40	PASS	NA	GT	0	0	0	0	0	0	1	0	0	0	0	0	0	0	0	0	0	0	0	0	0	0	0	0	0	0	0	0	0	0	0	0	0	0	0	0	0	0	0	0	0
NC_007530	1577481	GAAACATTAT.GAGACTATCT	G	A	40	PASS	NA	GT	0	0	0	0	0	0	0	0	0	0	0	0	0	0	0	0	0	0	0	0	0	0	0	0	0	0	0	0	0	0	0	0	0	0	0	0	0	0	0	0	0
NC_007530	1578039	ATAAAAAAAT.TGGACAAGCA	T	C	40	PASS	NA	GT	0	0	0	0	0	0	0	0	0	0	0	0	0	0	0	0	0	0	0	0	0	0	0	0	1	0	0	0	0	0	0	0	0	0	0	0	0	0	0	0	0
NC_007530	1579409	GCAGAAAAGC.CTCCGTTTAC	C	T	40	PASS	NA	GT	0	0	0	0	0	0	0	0	0	0	0	0	0	0	0	0	0	0	0	0	0	0	0	0	0	0	0	0	0	0	0	0	0	0	0	0	0	0	0	0	0
NC_007530	1579464	TAATGTGGAA.GCTGAACGAT	G	C	40	PASS	NA	GT	0	0	0	0	0	0	0	0	1	0	0	0	0	0	0	0	0	0	0	0	0	0	0	0	0	0	0	0	0	0	0	0	0	0	0	0	0	0	0	0	0
NC_007530	1579466	ATGTGGAAGC.TGAACGATGG	T	C	40	PASS	NA	GT	0	0	0	0	0	0	0	0	1	0	0	0	0	0	0	0	0	0	0	0	0	0	0	0	0	0	0	0	0	0	0	0	0	0	0	0	0	0	0	0	0
NC_007530	1579866	AGTGGGAAAT.ATGGCAGGGG	A	T	40	PASS	NA	GT	0	0	0	0	0	0	0	0	0	1	0	0	0	0	0	0	0	0	0	0	0	0	0	0	0	0	0	0	0	0	0	0	0	0	0	0	0	0	0	0	0
NC_007530	1580150	CGGCACAGGC.AGATGCATCT	A	C	40	PASS	NA	GT	0	0	0	0	0	0	0	0	1	0	0	0	0	0	0	0	0	0	0	0	0	0	0	0	0	0	0	0	0	0	0	0	0	0	0	0	0	0	0	0	0
NC_007530	1580514	AAAATTATTT.GTGGCCGCGC	G	T	40	PASS	NA	GT	0	0	0	0	0	0	0	0	0	0	0	0	0	1	0	0	0	0	0	0	0	0	0	0	0	0	0	0	0	0	0	0	0	0	0	0	0	0	0	0	0
NC_007530	1580515	AAATTATTTG.TGGCCGCGCA	T	C	40	PASS	NA	GT	0	0	0	0	0	0	0	0	0	1	0	0	0	0	0	0	0	0	0	0	0	0	0	0	0	0	0	0	0	0	0	0	0	0	0	0	0	0	0	0	0
NC_007530	1580584	GATTCGAGTA.CATCTAATAA	C	A	40	PASS	NA	GT	0	0	0	0	0	0	0	0	0	0	0	0	0	1	0	0	0	0	0	0	0	0	0	0	0	0	0	0	0	0	0	0	0	0	0	0	0	0	0	0	0
NC_007530	1580596	TCTAATAAAA.TTGATACAAT	T	A	40	PASS	NA	GT	0	0	0	0	0	0	0	0	0	0	0	0	0	1	0	0	0	0	0	0	0	0	0	0	0	0	0	0	0	0	0	0	0	0	0	0	0	0	0	0	0
NC_007530	1580598	TAATAAAATT.GATACAATTC	G	T	40	PASS	NA	GT	0	0	0	0	0	0	0	0	0	0	0	0	0	1	0	0	0	0	0	0	0	0	0	0	0	0	0	0	0	0	0	0	0	0	0	0	0	0	0	0	0
NC_007530	1580602	AAAATTGATA.CAATTCCAGG	C	A	40	PASS	NA	GT	0	0	0	0	0	0	0	0	0	0	0	0	0	1	0	0	0	0	0	0	0	0	0	0	0	0	0	0	0	0	0	0	0	0	0	0	0	0	0	0	0
NC_007530	1580605	ATTGATACAA.TTCCAGGTTT	T	A	40	PASS	NA	GT	0	0	0	0	0	0	0	0	0	0	0	0	0	1	0	0	0	0	0	0	0	0	0	0	0	0	0	0	0	0	0	0	0	0	0	0	0	0	0	0	0
NC_007530	1580612	CAATTCCAGG.TTTAGTAATT	T	G	40	PASS	NA	GT	0	0	0	0	0	0	0	0	0	0	0	0	0	1	0	0	0	0	0	0	0	0	0	0	0	0	0	0	0	0	0	0	0	0	0	0	0	0	0	0	0
NC_007530	1580651	CAGAACCTAT.CAAAATTACT	C	T	40	PASS	NA	GT	0	0	0	0	0	0	0	0	0	0	0	0	0	1	0	0	0	0	0	0	0	0	0	0	0	0	0	0	0	0	0	0	0	0	0	0	0	0	0	0	0
NC_007530	1581058	GAAAAGCAAA.TGAAAAATCT	T	G	40	PASS	NA	GT	0	0	0	0	0	0	0	0	0	1	0	0	0	0	0	0	0	0	0	0	0	0	0	0	0	0	0	0	0	0	0	0	0	0	0	0	0	0	0	0	0
NC_007530	1581244	TGATTGTATG.CAAGCATGGC	C	A	40	PASS	NA	GT	0	0	1	0	0	0	0	0	0	0	0	0	0	0	0	0	0	0	0	0	0	0	0	0	0	0	0	0	0	0	0	0	0	0	0	0	0	0	0	0	0
NC_007530	1582843	TATGTTAGAT.GGGTCTCCTA	G	A	40	PASS	NA	GT	0	0	0	0	0	0	0	0	0	0	0	0	0	0	0	0	0	0	0	0	0	0	0	1	0	0	0	0	0	0	0	0	0	0	0	0	0	0	0	0	0
NC_007530	1583030	ACAAGTGTAT.TAAATGCGAA	T	C	40	PASS	NA	GT	0	0	0	0	0	0	0	0	0	1	0	0	0	0	0	0	0	0	0	0	0	0	0	0	0	0	0	0	0	0	0	0	0	0	0	0	0	0	0	0	0
NC_007530	1583744	TAGAAAGCTC.GCTCGGTTCA	G	A	40	PASS	NA	GT	0	0	0	0	0	0	0	0	0	0	0	0	0	0	0	0	0	0	0	0	0	0	0	0	0	0	0	0	0	0	0	0	0	0	0	0	0	0	0	0	0
NC_007530	1583774	ATAAAAAAAT.GAAGCAAATT	G	T	40	PASS	NA	GT	0	0	1	0	0	0	0	0	0	0	0	0	0	0	0	0	0	0	0	0	0	0	0	0	0	0	0	0	0	0	0	0	0	0	0	0	0	0	0	0	0
NC_007530	1585168	ACGTTAGAAA.ATGTACTAGG	A	C	40	PASS	NA	GT	0	0	0	0	0	0	0	0	1	0	0	0	0	0	0	0	0	0	0	0	0	0	0	0	0	0	0	0	0	0	0	0	0	0	0	0	0	0	0	0	0
NC_007530	1585620	CATTTTAAAT.AACGTTTCAC	A	T	40	PASS	NA	GT	0	0	0	0	0	0	0	0	1	0	0	0	0	0	0	0	0	0	0	0	0	0	0	0	0	0	0	0	0	0	0	0	0	0	0	0	0	0	0	0	0
NC_007530	1586512	AAATACGAAA.GAATATTGGT	G	T	40	PASS	NA	GT	0	0	0	0	0	0	0	0	0	0	0	0	0	0	0	0	0	0	0	0	0	0	0	0	0	0	1	0	0	0	0	0	0	0	0	0	0	0	0	0	0
NC_007530	1587206	CTTTACTCGG.AATGATTGCG	A	G	40	PASS	NA	GT	0	1	0	0	0	0	0	1	0	0	1	1	1	1	0	0	0	0	0	0	0	0	0	0	0	0	0	0	0	0	0	0	0	0	0	0	0	1	0	0	0
NC_007530	1590304	TACTTCAAAT.AATATTGCAA	A	C	40	PASS	NA	GT	0	0	0	0	0	0	0	0	1	0	0	0	0	0	0	0	0	0	0	0	0	0	0	0	0	0	0	0	0	0	0	0	0	0	0	0	0	0	0	0	0
NC_007530	1590330	AAACAGTCGG.ATATAAAAAG	A	T	40	PASS	NA	GT	0	0	0	0	0	0	0	0	1	0	0	0	0	0	0	0	0	0	0	0	0	0	0	0	0	0	0	0	0	0	0	0	0	0	0	0	0	0	0	0	0
NC_007530	1590739	GATTCAAACA.GATAAAGCGA	G	C	40	PASS	NA	GT	0	0	0	0	0	0	0	0	0	1	0	0	0	0	0	0	0	0	0	0	0	0	0	0	0	0	0	0	0	0	0	0	0	0	0	0	0	0	0	0	0
NC_007530	1590753	AAGCGACAAT.AGGTGGTAAC	A	G	40	PASS	NA	GT	0	0	0	0	0	0	0	0	0	1	0	0	0	0	0	0	0	0	0	0	0	0	0	0	0	0	0	0	0	0	0	0	0	0	0	0	0	0	0	0	0
NC_007530	1591042	TGAGGCTGTA.CAAAAAGATC	C	A	40	PASS	NA	GT	0	0	0	0	0	0	0	0	1	0	0	0	0	0	0	0	0	0	0	0	0	0	0	0	0	0	0	0	0	0	0	0	0	0	0	0	0	0	0	0	0
NC_007530	1591378	TGTTGCTGGT.GAGAATGGTG	G	A	40	PASS	NA	GT	0	0	0	0	0	0	0	0	0	0	0	0	0	0	0	0	0	0	0	0	0	0	0	0	0	0	0	0	1	0	0	0	0	0	0	0	0	0	0	0	0
NC_007530	1591700	TATATATTTA.CCGGATCAAT	C	A	40	PASS	NA	GT	0	0	1	0	0	0	0	0	0	0	0	0	0	0	0	0	0	0	0	0	0	0	0	0	0	0	0	0	0	0	0	0	0	0	0	0	0	0	0	0	0
NC_007530	1591929	TTGAAAAGCT.CTTAAAAAGT	C	T	40	PASS	NA	GT	0	0	0	0	0	0	0	0	0	0	0	0	0	0	0	0	0	0	0	0	0	0	0	0	0	0	0	0	0	0	0	0	0	0	0	0	0	0	0	0	0
NC_007530	1592798	TTCGTTTTAA.TAAAGCTTAA	T	C	40	PASS	NA	GT	0	0	0	0	0	0	0	0	0	0	0	0	0	0	0	0	0	0	0	0	0	0	0	1	0	0	0	0	0	0	0	0	0	0	0	0	0	0	0	0	0
NC_007530	1593083	ATTTAAAATC.GACAAAGCCA	G	T	40	PASS	NA	GT	0	0	0	0	0	0	0	0	1	0	0	0	0	0	0	0	0	0	0	0	0	0	0	0	0	0	0	0	0	0	0	0	0	0	0	0	0	0	0	0	0
NC_007530	1593866	TTTAGGTCAG.TAGAAGAAAA	T	C	40	PASS	NA	GT	0	0	0	0	0	0	0	0	1	0	0	0	0	0	0	0	0	0	0	0	0	0	0	0	0	0	0	0	0	0	0	0	0	0	0	0	0	0	0	0	0
NC_007530	1594019	ATTAAACGTT.TCTGGAGTGT	T	G	40	PASS	NA	GT	0	0	0	0	0	0	0	0	1	0	0	0	0	0	0	0	0	0	0	0	0	0	0	0	0	0	0	0	0	0	0	0	0	0	0	0	0	0	0	0	0
NC_007530	1594162	TAACGCAAAC.TTTTTCGGTG	T	A	40	PASS	NA	GT	0	0	0	0	0	0	0	0	0	0	0	0	0	0	0	0	0	0	0	0	0	0	0	0	0	0	0	0	0	0	0	0	0	0	0	0	0	0	0	0	0
NC_007530	1597271	AATTAATAAA.GTGTACATCC	G	A	40	PASS	NA	GT	0	0	0	0	0	0	0	0	0	0	0	0	0	0	0	0	0	0	0	0	0	0	0	0	0	0	0	0	0	0	0	0	0	0	0	0	0	0	0	0	0
NC_007530	1597708	AATGATATTA.ATGCAAAGCT	A	T	40	PASS	NA	GT	0	0	0	0	0	0	0	0	0	0	0	0	0	1	0	0	0	0	0	0	0	0	0	0	0	0	0	0	0	0	0	0	0	0	0	0	0	0	0	0	0
NC_007530	1600499	AATAATGGCG.TACTTCCCAT	T	A	40	PASS	NA	GT	0	0	1	1	1	1	1	0	0	0	0	0	0	0	0	0	1	0	0	0	0	1	0	0	0	0	0	0	1	0	0	0	0	0	0	0	0	0	0	0	0
NC_007530	1600516	CATAAGAAAA.ATGTTTTATT	A	G	40	PASS	NA	GT	0	0	0	0	0	0	0	0	1	0	0	0	0	0	0	0	0	0	0	0	0	0	0	0	0	0	0	0	0	0	0	0	0	0	0	0	0	0	0	0	0
NC_007530	1602362	ACAGTAGATG.CGATTACAGT	C	T	40	PASS	NA	GT	0	0	0	0	0	0	0	0	0	0	0	0	0	0	0	0	0	0	0	0	0	0	0	0	0	0	0	0	0	0	0	0	0	0	0	0	0	0	0	0	0
NC_007530	1603279	GAAATGTTTA.GAGTCTCTTA	G	T	40	PASS	NA	GT	0	0	1	0	0	0	0	0	0	0	0	0	0	0	0	0	0	0	0	0	0	0	0	0	0	0	0	0	0	0	0	0	0	0	0	0	0	0	0	0	0
NC_007530	1603520	ATAAAATTCC.ATCAAAATAA	A	C	40	PASS	NA	GT	0	0	0	0	0	0	0	0	1	0	0	0	0	0	0	0	0	0	0	0	0	0	0	0	0	0	0	0	0	0	0	0	0	0	0	0	0	0	0	0	0
NC_007530	1603521	TAAAATTCCA.TCAAAATAAA	T	A	40	PASS	NA	GT	0	0	0	0	0	0	0	0	1	0	0	0	0	0	0	0	0	0	0	0	0	0	0	0	0	0	0	0	0	0	0	0	0	0	0	0	0	0	0	0	0
NC_007530	1603558	GGAAATTACT.AGTTTTTCAG	A	G	40	PASS	NA	GT	0	0	0	0	0	0	0	0	0	0	0	0	0	0	0	0	0	0	0	0	0	0	0	0	0	0	0	0	0	0	0	0	0	0	0	0	0	0	0	0	0
NC_007530	1604389	TTGTGAAATG.TTTGTTACAC	T	C	40	LCB	NA	GT	0	0	0	0	0	0	0	0	0	0	0	0	0	1	0	0	0	0	0	0	0	0	0	0	0	0	0	0	0	0	0	0	0	0	0	0	0	0	0	0	0
NC_007530	1606211	TCTTCTTAAA.CTAAAAAGGA	C	A	40	PASS	NA	GT	0	0	0	0	0	0	0	0	0	0	0	0	0	0	0	0	0	0	0	0	0	0	0	0	0	0	0	0	0	0	0	0	0	0	0	0	0	0	0	0	0
NC_007530	1607741	CATCATCAGC.TGCACTGTTA	T	A	40	PASS	NA	GT	0	0	0	0	0	0	0	0	0	0	0	0	0	0	0	0	0	0	0	0	0	0	0	0	0	0	0	0	0	0	0	0	0	0	0	0	0	1	0	0	0
NC_007530	1607916	CGGTAATATG.CGAAAAAATC	C	T	40	PASS	NA	GT	0	0	1	0	0	0	0	0	0	0	0	0	0	0	0	0	0	0	0	0	0	0	0	0	0	0	0	0	0	0	0	0	0	0	0	0	0	0	0	0	0
NC_007530	1607978	CTAAAAATTC.GAATTAATAA	G	A,T	40	PASS	NA	GT	0	0	0	0	0	0	0	0	0	0	0	0	0	0	0	0	0	0	0	0	0	0	0	0	0	0	0	1	0	0	0	0	0	0	0	0	0	0	0	0	0
NC_007530	1609921	AAAATATTGT.CGAACATTCT	C	A	40	PASS	NA	GT	0	0	0	0	0	0	0	0	0	0	0	0	0	0	0	0	0	0	0	0	0	0	0	0	0	0	0	0	0	0	0	0	0	0	0	0	0	0	0	0	0
NC_007530	1610415	TAAAGTAGAT.GTATATTTAA	G	A	40	PASS	NA	GT	0	0	0	0	0	0	0	0	1	0	0	0	0	0	0	0	0	0	0	0	0	0	0	0	0	0	0	0	0	0	0	0	0	0	0	0	0	0	0	0	0
NC_007530	1611885	GGTCCGTGGA.TGTTTCAAGA	T	A	40	PASS	NA	GT	0	0	0	0	0	0	0	0	1	0	0	0	0	0	0	0	0	0	0	0	0	0	0	0	0	0	0	0	0	0	0	0	0	0	0	0	0	0	0	0	0
NC_007530	1612514	TGCTCTTCCG.CTCATGGGAA	C	T	40	PASS	NA	GT	0	0	0	0	0	0	0	0	0	1	0	0	0	0	0	0	0	0	0	0	0	0	0	0	0	0	0	0	0	0	0	0	0	0	0	0	0	0	0	0	0
NC_007530	1613361	TTATCAAAAG.TGGGAGTACG	T	C	40	PASS	NA	GT	0	0	0	0	0	0	0	0	0	0	0	0	0	0	0	0	0	0	0	0	0	0	0	0	0	0	0	1	0	0	0	0	0	0	0	0	0	0	0	0	0
NC_007530	1613661	ACCAATGGTG.GAAAACCGTC	G	A	40	PASS	NA	GT	0	1	0	0	0	0	0	1	0	0	1	1	1	1	0	0	0	0	0	0	0	0	0	0	0	0	0	0	0	0	0	0	0	0	0	0	0	0	0	0	0
NC_007530	1614127	TTGGCGGGAA.CTTATTAATT	C	T	40	PASS	NA	GT	0	0	0	0	0	0	0	0	1	0	0	0	0	0	0	0	0	0	0	0	0	0	0	0	0	0	0	0	0	0	0	0	0	0	0	0	0	0	0	0	0
NC_007530	1615496	AATTTATCAA.AATCATGTTG	A	G	40	PASS	NA	GT	0	0	0	0	0	0	0	0	1	0	0	0	0	0	0	0	0	0	0	0	0	0	0	0	0	0	0	0	0	0	0	0	0	0	0	0	0	0	0	0	0
NC_007530	1615969	TCGAAAGTTA.TTTGACCAAT	T	C	40	PASS	NA	GT	0	0	0	0	0	0	0	0	1	0	0	0	0	0	0	0	0	0	0	0	0	0	0	0	0	0	0	0	0	0	0	0	0	0	0	0	0	0	0	0	0
NC_007530	1616347	AACGAAAAAG.TAAAAAGCTG	T	C	40	PASS	NA	GT	0	1	1	1	1	1	1	1	1	1	1	1	1	1	1	1	1	1	1	1	1	1	1	1	1	1	1	1	1	1	1	1	1	1	1	1	1	1	1	1	1
NC_007530	1616542	GATTACAGAA.GAAGTAATCG	G	T	40	PASS	NA	GT	0	0	1	0	0	0	0	0	0	0	0	0	0	0	0	0	0	0	0	0	0	0	0	0	0	0	0	0	0	0	0	0	0	0	0	0	0	0	0	0	0
NC_007530	1618029	AGACTCCTAA.TAAAGGAGTC	T	A	40	PASS	NA	GT	0	0	0	0	0	0	0	0	0	0	0	0	0	0	0	0	0	0	0	0	0	0	0	0	0	0	0	0	0	0	0	0	0	0	0	0	0	0	0	0	0
NC_007530	1618204	AAAAGTAGAA.GGGAATAAAG	G	A	40	PASS	NA	GT	0	0	0	0	0	0	0	0	0	0	0	0	0	0	0	0	0	0	0	0	0	0	0	0	0	0	0	0	0	0	0	0	0	0	0	0	0	0	0	0	0
NC_007530	1618436	CACTCTTTAC.TGCATCTTAT	T	G	40	PASS	NA	GT	0	0	0	0	0	0	0	0	0	0	0	0	0	0	0	0	0	0	0	0	1	0	0	0	0	0	0	0	0	0	0	0	0	0	0	0	0	0	0	0	0
NC_007530	1618585	AGTGAATAAA.CTTATTGAAC	C	T	40	PASS	NA	GT	0	0	0	0	0	0	0	0	0	0	0	0	0	0	0	0	0	0	0	0	0	0	0	0	0	0	0	0	0	1	0	1	0	0	0	0	1	0	0	0	0
NC_007530	1618650	AAAATGCTGT.AGGAATGATT	A	T	40	PASS	NA	GT	0	0	0	0	0	0	0	0	0	1	0	0	0	0	0	0	0	0	0	0	0	0	0	0	0	0	0	0	0	0	0	0	0	0	0	0	0	0	0	0	0
NC_007530	1620973	TTCTTCCTTT.TTATTTATTT	T	A	40	PASS	NA	GT	0	0	0	0	0	0	0	0	0	0	0	0	0	1	0	0	0	0	0	0	0	0	0	0	0	0	0	0	0	0	0	0	0	0	0	0	0	0	0	0	0
NC_007530	1622332	TTTACGGTTA.CAAAAATGAT	C	T	40	PASS	NA	GT	0	0	1	0	0	0	0	0	0	0	0	0	0	0	0	0	0	0	0	0	0	0	0	0	0	0	0	0	0	0	0	0	0	0	0	0	0	0	0	0	0
NC_007530	1622968	TTCACACCAT.ATATTTCATG	A	T	40	PASS	NA	GT	0	0	0	0	0	0	0	0	1	0	0	0	0	0	0	0	0	0	0	0	0	0	0	0	0	0	0	0	0	0	0	0	0	0	0	0	0	0	0	0	0
NC_007530	1623525	AAAAATGAAG.TGGCATTTCT	T	A	40	PASS	NA	GT	0	0	0	0	0	0	0	0	0	0	0	0	0	0	0	0	0	0	0	0	0	0	0	0	0	0	0	0	0	0	0	0	0	0	0	0	0	0	0	0	0
NC_007530	1624647	TAACAGCTGC.TGCTGTTATG	T	G	40	PASS	NA	GT	0	0	0	0	0	0	0	0	0	0	0	0	0	0	0	0	0	0	0	0	0	0	0	0	0	0	0	0	0	0	0	0	0	0	0	0	0	0	0	0	0
NC_007530	1624803	CATCGTCTTC.CTCTAATAAA	C	T	40	PASS	NA	GT	0	0	0	0	0	0	0	0	1	0	0	0	0	0	0	0	0	0	0	0	0	0	0	0	0	0	0	0	0	0	0	0	0	0	0	0	0	0	0	0	0
NC_007530	1624818	ATAAAAAACT.CGTTTCACAT	C	G	40	PASS	NA	GT	0	0	0	0	0	0	0	0	0	1	0	0	0	0	0	0	0	0	0	0	0	0	0	0	0	0	0	0	0	0	0	0	0	0	0	0	0	0	0	0	0
NC_007530	1624819	TAAAAAACTC.GTTTCACATC	G	T	40	PASS	NA	GT	0	0	0	0	0	0	0	0	0	1	0	0	0	0	0	0	0	0	0	0	0	0	0	0	0	0	0	0	0	0	0	0	0	0	0	0	0	0	0	0	0
NC_007530	1625969	TTTATCAGTG.CGTAAAGAAG	C	G	40	PASS	NA	GT	0	0	0	0	0	0	0	0	1	0	0	0	0	0	0	0	0	0	0	0	0	0	0	0	0	0	0	0	0	0	0	0	0	0	0	0	0	0	0	0	0
NC_007530	1625976	GTGCGTAAAG.AAGTGAATAA	A	G	40	PASS	NA	GT	0	0	0	0	0	0	0	0	1	0	0	0	0	0	0	0	0	0	0	0	0	0	0	0	0	0	0	0	0	0	0	0	0	0	0	0	0	0	0	0	0
NC_007530	1627523	ACACCGAGAT.TAATTTCATG	T	C	40	PASS	NA	GT	0	1	1	1	1	1	1	1	1	1	1	1	1	1	1	1	1	1	1	1	1	1	1	1	1	1	1	1	1	1	1	1	1	1	1	1	1	1	1	1	1
NC_007530	1627871	TGTTTAACAC.CTAGTTTTTC	C	G	40	PASS	NA	GT	0	0	0	0	0	0	0	0	1	0	0	0	0	0	0	0	0	0	0	0	0	0	0	0	0	0	0	0	0	0	0	0	0	0	0	0	0	0	0	0	0
NC_007530	1627887	TTTCTGCAAC.GATCGTAAGC	G	T	40	PASS	NA	GT	0	1	0	0	0	0	0	1	0	0	1	1	1	1	0	0	0	0	0	0	0	0	0	0	0	0	0	0	0	0	0	0	0	0	0	0	0	1	0	0	0
NC_007530	1628726	CAATGTCAGA.CCAAATCATT	C	T	40	PASS	NA	GT	0	0	0	0	0	0	0	0	0	0	0	0	0	0	0	0	0	0	0	0	0	0	0	1	0	0	0	0	0	0	0	0	0	0	0	0	0	0	0	0	0
NC_007530	1628794	TATGTGAAGC.CATCTCATGA	C	T	40	PASS	NA	GT	0	0	0	0	0	0	0	0	0	0	0	0	0	0	0	0	0	0	0	0	0	0	0	0	0	0	0	0	0	0	0	0	0	0	0	0	0	0	0	0	0
NC_007530	1629307	GGGACAACGG.GAAAAATTTT	G	T	40	PASS	NA	GT	0	0	1	0	0	0	0	0	0	0	0	0	0	0	0	0	0	0	0	0	0	0	0	0	0	0	0	0	0	0	0	0	0	0	0	0	0	0	0	0	0
NC_007530	1629680	GGGATTTATT.TGAACAGCTT	T	G	40	PASS	NA	GT	0	0	0	0	0	0	0	0	1	0	0	0	0	0	0	0	0	0	0	0	0	0	0	0	0	0	0	0	0	0	0	0	0	0	0	0	0	0	0	0	0
NC_007530	1631215	GCGATTATTG.CTGTTATGAT	C	G	40	PASS	NA	GT	0	0	0	0	0	0	0	0	0	0	0	0	0	0	0	0	0	0	0	0	0	0	0	0	0	0	0	0	0	0	0	0	0	0	0	0	0	0	0	0	0
NC_007530	1631327	GAATCGTGAT.GGTTGTAGGG	G	T	40	PASS	NA	GT	0	0	1	0	0	0	0	0	0	0	0	0	0	0	0	0	0	0	0	0	0	0	0	0	0	0	0	0	0	0	0	0	0	0	0	0	0	0	0	0	0
NC_007530	1631552	CGCTTATTAT.CCCAGGTATT	C	T	40	PASS	NA	GT	0	0	0	0	0	0	0	0	0	0	0	0	0	0	0	0	0	0	0	0	0	0	0	0	0	0	0	0	0	0	0	0	0	0	0	0	0	0	0	0	0
NC_007530	1632079	AATGGAGAAA.CTACAATGTG	C	T	40	PASS	NA	GT	0	0	0	0	0	0	0	0	0	1	0	0	0	0	0	0	0	0	0	0	0	0	0	0	0	0	0	0	0	0	0	0	0	0	0	0	0	0	0	0	0
NC_007530	1632778	GAAATTCTAT.TATCTTTACT	T	C	40	PASS	NA	GT	0	0	0	0	0	0	0	0	0	0	0	0	0	0	0	0	0	0	0	0	0	0	0	0	0	0	0	0	0	0	0	0	0	0	0	0	0	0	0	0	0
NC_007530	1634812	CTCTCCTTAT.GAAGGCATGT	G	A	40	PASS	NA	GT	0	0	0	0	0	0	0	0	0	0	0	0	0	0	0	0	0	0	0	0	0	0	0	0	0	0	0	0	0	0	0	0	0	0	0	0	0	0	0	0	0
NC_007530	1636397	TTTCAGCGAA.TTTGGTCAGA	T	G	40	PASS	NA	GT	0	0	0	0	0	0	0	0	1	0	0	0	0	0	0	0	0	0	0	0	0	0	0	0	0	0	0	0	0	0	0	0	0	0	0	0	0	0	0	0	0
NC_007530	1638143	GATAGAGAAT.ACGGGTCATC	A	G	40	PASS	NA	GT	0	0	0	0	0	0	0	0	0	0	0	0	0	0	0	0	0	0	0	0	0	0	0	0	0	0	0	0	0	0	0	0	0	0	0	0	0	0	0	0	0
NC_007530	1638711	TCTGGTCGGT.CATTTTCTAT	C	A	40	PASS	NA	GT	0	0	1	0	0	0	0	0	0	0	0	0	0	0	0	0	0	0	0	0	0	0	0	0	0	0	0	0	0	0	0	0	0	0	0	0	0	0	0	0	0
NC_007530	1638818	AAGTTGTGTC.GCTTCCTCTA	G	T	40	PASS	NA	GT	0	0	0	0	0	0	0	0	1	0	0	0	0	0	0	0	0	0	0	0	0	0	0	0	0	0	0	0	0	0	0	0	0	0	0	0	0	0	0	0	0
NC_007530	1639200	TGCAACTTAT.CTTCATGTAA	C	T	40	PASS	NA	GT	0	0	0	0	0	0	0	0	0	0	0	0	0	0	0	0	0	0	1	0	0	0	0	0	0	0	0	0	0	0	0	0	0	0	0	0	0	0	0	0	0
NC_007530	1639335	GTACGCGAAT.CATTTCCTAA	C	A	40	PASS	NA	GT	0	0	0	0	0	0	0	0	0	0	0	0	0	0	0	0	0	0	0	0	0	0	0	1	0	0	0	0	0	0	0	0	0	0	0	0	0	0	0	0	0
NC_007530	1639521	ACTTCTACAA.ATTTATAAAT	A	C	40	PASS	NA	GT	0	0	0	0	0	0	0	0	1	0	0	0	0	0	0	0	0	0	0	0	0	0	0	0	0	0	0	0	0	0	0	0	0	0	0	0	0	0	0	0	0
NC_007530	1639916	TAATAATGAA.AAAGCTTTTT	A	C	40	PASS	NA	GT	0	0	0	0	0	0	0	0	0	0	0	0	0	0	0	0	0	0	0	0	0	0	0	0	0	0	0	0	0	0	0	0	0	0	0	0	0	0	0	0	0
NC_007530	1665514	ATGTTCTAGT.ACATTTTCTG	A	C	40	PASS	NA	GT	0	0	0	0	0	0	0	0	0	0	0	0	0	1	0	0	0	0	0	0	0	0	0	0	0	0	0	0	0	0	0	0	0	0	0	0	0	0	0	0	0
NC_007530	1665716	TTAGCGAGTA.CTTTTAATGT	C	A	40	PASS	NA	GT	0	0	1	0	0	0	0	0	0	0	0	0	0	0	0	0	0	0	0	0	0	0	0	0	0	0	0	0	0	0	0	0	0	0	0	0	0	0	0	0	0
NC_007530	1685266	GATCAAGTTA.GAGATGCGAT	G	A	40	PASS	NA	GT	0	0	0	0	0	0	0	0	0	0	0	0	0	0	0	0	0	0	0	0	0	0	0	0	0	0	0	0	0	0	0	0	0	0	0	0	0	0	0	0	0
NC_007530	1685824	GACACAAGTC.AGCCAGGAGC	A	G	40	PASS	NA	GT	0	0	0	0	0	0	0	0	0	0	0	0	0	0	0	0	0	0	0	0	0	0	0	0	1	1	0	1	0	0	0	0	0	0	0	0	0	0	0	0	0
NC_007530	1686261	TTTTTAAGAA.GAATACCAGC	G	A	40	PASS	NA	GT	0	0	0	0	0	0	0	0	0	0	0	0	0	0	0	0	0	0	0	0	0	0	0	0	0	0	0	0	0	0	0	0	0	0	0	0	0	0	0	0	0
NC_007530	1689307	TGGCGGGTTT.ACACTTCATA	A	T	40	PASS	NA	GT	0	0	0	0	0	0	0	0	0	0	0	0	0	1	0	0	0	0	0	0	0	0	0	0	0	0	0	0	0	0	0	0	0	0	0	0	0	0	0	0	0
NC_007530	1689562	CGATCGTGTT.GAAACGCCGT	G	A	40	PASS	NA	GT	0	0	0	0	0	0	0	0	0	1	0	0	0	0	0	0	0	0	0	0	0	0	0	0	0	0	0	0	0	0	0	0	0	0	0	0	0	0	0	0	0
NC_007530	1690434	AGAAGAAGCT.CCCTATATTA	C	T	40	PASS	NA	GT	0	0	0	0	0	0	0	0	0	1	0	0	0	0	0	0	0	0	0	0	0	0	0	0	0	0	0	0	0	0	0	0	0	0	0	0	0	0	0	0	0
NC_007530	1691671	ATATGAGGGC.ATAGCTTTTT	A	T	40	PASS	NA	GT	0	0	0	0	0	0	0	0	1	0	0	0	0	0	0	0	0	0	0	0	0	0	0	0	0	0	0	0	0	0	0	0	0	0	0	0	0	0	0	0	0
NC_007530	1692508	ACCGCGGAAC.CAAAGCCTTT	C	A	40	PASS	NA	GT	0	0	0	0	0	0	0	0	0	0	0	0	0	0	0	0	0	0	0	0	0	0	0	0	0	0	0	0	0	0	0	0	0	0	0	0	0	0	0	0	0
NC_007530	1694236	TTTTATTTTG.ATATGAAAAA	A	G	40	PASS	NA	GT	0	0	0	0	0	0	0	0	0	0	0	0	0	1	0	0	0	0	0	0	0	0	0	0	0	0	0	0	0	0	0	0	0	0	0	0	0	0	0	0	0
NC_007530	1695772	CCAATCCTTT.CACTGTGATG	C	T	40	PASS	NA	GT	0	0	0	0	0	0	0	0	0	0	0	0	0	0	0	0	0	0	0	1	0	0	0	0	0	0	0	0	0	0	0	0	0	0	0	0	0	0	0	0	0
NC_007530	1697187	GCAGAAATGA.ACACAACAAT	A	C	40	PASS	NA	GT	0	0	0	0	0	0	0	0	0	0	0	0	0	0	0	0	0	0	0	0	0	0	0	0	0	0	0	0	0	0	0	0	0	0	0	0	0	0	0	0	0
NC_007530	1698209	AATTGATATT.AAAAATTGCA	A	G	40	PASS	NA	GT	0	0	0	0	0	0	0	0	1	0	0	0	0	0	0	0	0	0	0	0	0	0	0	0	0	0	0	0	0	0	0	0	0	0	0	0	0	0	0	0	0
NC_007530	1698382	AAATTCGATG.AAAATGAAAT	A	T	40	PASS	NA	GT	0	0	0	0	0	0	0	0	0	0	0	0	0	0	0	0	0	0	0	0	0	0	0	0	0	0	0	0	0	0	0	0	0	0	0	0	0	0	0	0	0
NC_007530	1698384	ATTCGATGAA.AATGAAATTG	A	T	40	PASS	NA	GT	0	0	0	0	0	0	0	0	0	0	0	0	0	0	0	0	0	0	0	0	0	0	0	0	0	0	0	0	0	0	0	0	0	0	0	0	0	0	0	0	0
NC_007530	1698403	GTAGATTATT.TTGGTGAACC	T	A	40	PASS	NA	GT	0	0	0	0	0	0	0	0	0	0	0	0	0	0	0	0	0	0	0	0	0	0	0	0	0	0	0	0	0	0	0	0	0	0	0	0	0	0	0	0	0
NC_007530	1698775	TGTTATTTAT.ACCGATGTCT	A	C	40	PASS	NA	GT	0	0	0	0	0	0	0	0	0	0	0	0	0	1	0	0	0	0	0	0	0	0	0	0	0	0	0	0	0	0	0	0	0	0	0	0	0	0	0	0	0
NC_007530	1699092	TTTAGTTCTG.ACATCATTTT	A	G	40	PASS	NA	GT	0	0	0	0	0	0	0	0	0	0	0	0	0	0	0	0	0	0	0	0	0	0	1	0	0	0	0	0	0	0	1	0	0	0	0	0	0	0	0	0	0
NC_007530	1705389	GCAGGAAAAG.ATCTTTGAAG	A	G	40	PASS	NA	GT	0	0	0	0	0	0	0	0	0	0	0	0	0	0	0	0	0	0	0	0	0	0	0	0	0	1	0	0	0	0	0	0	0	0	0	0	0	0	0	0	0
NC_007530	1705495	GAAAATCCCT.CCGTACATAT	C	A	40	PASS	NA	GT	0	0	1	0	0	0	0	0	0	0	0	0	0	0	0	0	0	0	0	0	0	0	0	0	0	0	0	0	0	0	0	0	0	0	0	0	0	0	0	0	0
NC_007530	1706631	AGGGATGATT.TCTATTCGAA	T	C	40	PASS	NA	GT	0	0	0	0	0	0	0	0	1	0	0	0	0	0	0	0	0	0	0	0	0	0	0	0	0	0	0	0	0	0	0	0	0	0	0	0	0	0	0	0	0
NC_007530	1706975	AATTAACGTT.TGAAAATATG	T	C	40	PASS	NA	GT	0	0	0	0	0	0	0	0	1	0	0	0	0	0	0	0	0	0	0	0	0	0	0	0	0	0	0	0	0	0	0	0	0	0	0	0	0	0	0	0	0
NC_007530	1707024	ATTAATGCTG.ACAATTACAT	A	G	40	PASS	NA	GT	0	0	0	0	0	0	0	0	0	0	0	0	0	0	0	0	0	0	0	0	0	0	0	0	0	0	0	0	0	0	0	0	0	0	0	0	0	0	0	0	0
NC_007530	1707849	ACAAGGGGGA.TTTGTTTTAT	T	G	40	PASS	NA	GT	0	0	0	0	0	0	0	0	0	0	0	0	0	0	0	0	0	0	0	0	0	0	0	0	0	0	0	0	0	0	0	0	0	0	0	0	0	0	0	0	0
NC_007530	1708059	GTGACGGAAC.ATCTTGATCC	A	G	40	PASS	NA	GT	0	0	0	0	0	0	0	0	0	0	0	0	0	0	0	0	0	0	0	0	0	0	0	0	0	0	0	0	0	1	0	1	0	0	0	0	1	0	0	0	0
NC_007530	1709392	CGCAGGTCCA.AATTTAGTAG	A	G	40	PASS	NA	GT	0	0	0	0	0	0	0	0	1	0	0	0	0	0	0	0	0	0	0	0	0	0	0	0	0	0	0	0	0	0	0	0	0	0	0	0	0	0	0	0	0
NC_007530	1710248	ATGTGTAAGA.CCACCGCCAA	C	A	40	PASS	NA	GT	0	0	1	0	0	0	0	0	0	0	0	0	0	0	0	0	0	0	0	0	0	0	0	0	0	0	0	0	0	0	0	0	0	0	0	0	0	0	0	0	0
NC_007530	1711379	ACAATTTTAC.GCATGTTGCC	G	T	40	PASS	NA	GT	0	0	0	0	0	0	0	0	0	0	0	0	0	1	0	0	0	0	0	0	0	0	0	0	0	0	0	0	0	0	0	0	0	0	0	0	0	0	0	0	0
NC_007530	1715168	CCATCGGTTG.CGATAGATGA	C	T	40	PASS	NA	GT	0	0	0	0	0	0	0	0	0	0	0	0	0	0	0	0	0	0	0	0	0	0	0	0	0	0	0	0	0	0	0	0	0	0	0	0	0	0	0	0	0
NC_007530	1715360	ATCCTTCCCT.TCATCTCTGC	T	C	40	PASS	NA	GT	0	0	0	0	0	0	0	0	0	0	0	0	0	0	0	0	0	0	0	0	0	0	0	0	0	0	0	0	0	0	0	0	0	0	0	0	0	0	0	0	0
NC_007530	1717874	TTTTTACATG.TTGATGAACA	T	C	40	PASS	NA	GT	0	1	1	1	1	1	1	1	1	1	1	1	1	1	1	1	1	1	1	1	1	1	1	1	1	1	1	1	1	1	1	1	1	1	1	1	1	1	1	1	1
NC_007530	1718133	GTTATGCGAC.AAAACAATTG	A	T	40	PASS	NA	GT	0	0	0	0	0	0	0	0	1	0	0	0	0	0	0	0	0	0	0	0	0	0	0	0	0	0	0	0	0	0	0	0	0	0	0	0	0	0	0	0	0
NC_007530	1718135	TATGCGACAA.AACAATTGAA	A	C	40	PASS	NA	GT	0	0	0	0	0	0	0	0	1	0	0	0	0	0	0	0	0	0	0	0	0	0	0	0	0	0	0	0	0	0	0	0	0	0	0	0	0	0	0	0	0
NC_007530	1718349	AATGCAATGC.GTAATATCGA	G	T	40	PASS	NA	GT	0	0	0	0	1	0	0	0	0	0	0	0	0	0	0	0	0	0	0	0	0	0	0	0	0	0	0	0	0	0	0	0	0	0	0	0	0	0	0	0	0
NC_007530	1718966	TTTGTGAAGC.ACAAAGAAAT	A	G	40	PASS	NA	GT	0	0	0	0	0	0	0	0	0	0	0	0	0	0	0	0	0	0	0	0	0	0	0	0	0	0	0	0	0	0	0	0	0	0	0	0	0	0	0	0	0
NC_007530	1718999	TATTTGGTTT.AAACCGAATG	A	T	40	PASS	NA	GT	0	0	0	0	0	0	0	0	0	0	0	0	0	0	0	0	0	0	0	0	0	0	0	0	0	0	0	0	0	0	0	0	0	0	0	0	0	0	0	0	0
NC_007530	1719003	TGGTTTAAAC.CGAATGTATG	C	G	40	PASS	NA	GT	0	0	0	0	0	0	0	0	0	0	0	0	0	0	0	0	0	0	0	0	0	0	0	0	0	0	0	0	0	0	0	0	0	0	0	0	0	0	0	0	0
NC_007530	1719004	GGTTTAAACC.GAATGTATGT	G	A	40	PASS	NA	GT	0	0	0	0	0	0	0	0	0	0	0	0	0	0	0	0	0	0	0	0	0	0	0	0	0	0	0	0	0	0	0	0	0	0	0	0	0	0	0	0	0
NC_007530	1719022	GTGCATCATC.CTGCCTTTAA	C	T	40	PASS	NA	GT	0	0	0	0	0	0	0	0	0	0	0	0	0	0	0	0	0	0	0	0	0	0	0	0	0	0	0	0	0	0	0	0	0	0	0	0	0	0	0	0	0
NC_007530	1719026	ATCATCCTGC.CTTTAAATGG	C	A	40	PASS	NA	GT	0	0	0	0	0	0	0	0	0	0	0	0	0	0	0	0	0	0	0	0	0	0	0	0	0	0	0	0	0	0	0	0	0	0	0	0	0	0	0	0	0
NC_007530	1724342	AAAAGAGTCT.CGTTCAAATA	C	T	40	PASS	NA	GT	0	0	0	0	0	0	0	0	0	0	0	0	0	0	0	0	0	0	0	0	0	0	0	0	0	0	0	0	0	0	0	0	0	0	0	0	0	0	0	0	0
NC_007530	1725406	GGTGTCATTC.AAGCGTTAAA	A	C	40	LCB	NA	GT	0	0	0	0	0	0	0	0	0	1	0	0	0	0	0	0	0	0	0	0	0	0	0	0	0	0	0	0	0	0	0	0	0	0	0	0	0	0	0	0	0
NC_007530	1725428	CATTAGCGAT.TGAAAAAATA	T	C	40	LCB	NA	GT	0	0	0	0	0	0	0	0	0	1	0	0	0	0	0	0	0	0	0	0	0	0	0	0	0	0	0	0	0	0	0	0	0	0	0	0	0	0	0	0	0
NC_007530	1727185	GGACGGAAGC.CGCAGGTGTC	C	A	40	PASS	NA	GT	0	0	1	0	0	0	0	0	0	0	0	0	0	0	0	0	0	0	0	0	0	0	0	0	0	0	0	0	0	0	0	0	0	0	0	0	0	0	0	0	0
NC_007530	1727412	GAGACCGCGC.CGGTGACTGA	C	A	40	PASS	NA	GT	0	0	0	0	0	0	0	0	0	0	0	0	0	0	0	0	0	0	0	0	0	0	0	0	0	0	0	0	0	0	0	0	0	0	0	0	0	0	0	0	0
NC_007530	1727415	ACCGCGCCGG.TGACTGAATT	T	A	40	PASS	NA	GT	0	0	0	0	0	0	0	0	0	0	0	0	0	0	0	0	0	0	0	0	0	0	0	0	0	0	0	0	0	0	0	0	0	0	0	0	0	0	0	0	0
NC_007530	1727416	CCGCGCCGGT.GACTGAATTT	G	T	40	PASS	NA	GT	0	0	0	0	0	0	0	0	0	0	0	0	0	0	0	0	0	0	0	0	0	0	0	0	0	0	0	0	0	0	0	0	0	0	0	0	0	0	0	0	0
NC_007530	1727426	GACTGAATTT.GAAAGGGTCG	G	C	40	PASS	NA	GT	0	0	0	0	0	0	0	0	0	0	0	0	0	0	0	0	0	0	0	0	0	0	0	0	0	0	0	0	0	0	0	0	0	0	0	0	0	0	0	0	0
NC_007530	1727431	AATTTGAAAG.GGTCGCCCCC	G	C	40	PASS	NA	GT	0	0	0	0	0	0	0	0	0	0	0	0	0	0	0	0	0	0	0	0	0	0	0	0	0	0	0	0	0	0	0	0	0	0	0	0	0	0	0	0	0
NC_007530	1729651	GTTCTGCATT.CATATCTGTT	C	T	40	PASS	NA	GT	0	0	0	0	0	0	0	0	0	0	0	0	0	0	0	0	0	0	0	0	0	0	0	0	0	0	0	0	0	0	0	0	0	0	0	0	0	0	0	0	0
NC_007530	1731085	GATTGTTGAG.ACGAGTATAT	A	C	40	PASS	NA	GT	0	0	0	0	0	0	0	0	0	0	0	0	0	0	0	0	0	0	0	0	0	0	0	0	0	0	0	0	0	0	0	0	0	0	0	0	0	0	0	0	0
NC_007530	1732183	CTGGACACGT.TATTCAATGC	T	C	40	PASS	NA	GT	0	0	0	0	0	0	0	0	1	0	0	0	0	0	0	0	0	0	0	0	0	0	0	0	0	0	0	0	0	0	0	0	0	0	0	0	0	0	0	0	0
NC_007530	1732184	TGGACACGTT.ATTCAATGCT	A	G	40	PASS	NA	GT	0	0	0	0	0	0	0	0	1	0	0	0	0	0	0	0	0	0	0	0	0	0	0	0	0	0	0	0	0	0	0	0	0	0	0	0	0	0	0	0	0
NC_007530	1732414	GCTTAGCAGA.TGCTTATATG	T	C	40	PASS	NA	GT	0	0	0	0	0	0	0	0	0	0	0	0	0	0	0	0	0	0	0	0	0	0	0	0	0	0	0	0	0	0	0	0	0	0	0	0	0	0	0	0	0
NC_007530	1732559	TGATGTGAAT.CAGTTATCAC	C	A	40	PASS	NA	GT	0	0	1	0	0	0	0	0	0	0	0	0	0	0	0	0	0	0	0	0	0	0	0	0	0	0	0	0	0	0	0	0	0	0	0	0	0	0	0	0	0
NC_007530	1733282	ATTAACGAAT.GGTGAAGCGA	G	C	40	PASS	NA	GT	0	0	0	0	0	0	0	0	1	0	0	0	0	0	0	0	0	0	0	0	0	0	0	0	0	0	0	0	0	0	0	0	0	0	0	0	0	0	0	0	0
NC_007530	1734592	GGTGTAATTG.AAACGACATT	A	C	40	PASS	NA	GT	0	0	0	0	0	0	0	0	1	0	0	0	0	0	0	0	0	0	0	0	0	0	0	0	0	0	0	0	0	0	0	0	0	0	0	0	0	0	0	0	0
NC_007530	1735324	ATTTGAATTT.AATACAATTG	A	C	40	PASS	NA	GT	0	0	0	0	0	0	0	0	1	0	0	0	0	0	0	0	0	0	0	0	0	0	0	0	0	0	0	0	0	0	0	0	0	0	0	0	0	0	0	0	0
NC_007530	1736111	AAAGAAGGGG.TACTTCATTT	T	G	40	PASS	NA	GT	0	0	0	0	0	0	0	0	0	0	0	0	0	1	0	0	0	0	0	0	0	0	0	0	0	0	0	0	0	0	0	0	0	0	0	0	0	0	0	0	0
NC_007530	1736400	TTGTTATTCG.TTATGAAGGA	T	G	40	PASS	NA	GT	0	0	0	0	0	0	0	0	1	0	0	0	0	0	0	0	0	0	0	0	0	0	0	0	0	0	0	0	0	0	0	0	0	0	0	0	0	0	0	0	0
NC_007530	1736409	GTTATGAAGG.ACCAAGAGGC	A	C	40	PASS	NA	GT	0	0	0	0	0	0	0	0	1	0	0	0	0	0	0	0	0	0	0	0	0	0	0	0	0	0	0	0	0	0	0	0	0	0	0	0	0	0	0	0	0
NC_007530	1737848	TGAATTCCCG.CAACGTTCAG	C	T	40	PASS	NA	GT	0	0	0	0	0	0	0	0	0	0	0	0	0	0	0	0	0	0	0	0	1	0	0	0	0	0	0	0	0	0	0	0	0	0	0	0	0	0	0	0	0
NC_007530	1739562	CCCTTTTGAG.TTTATCTCGC	T	C	40	PASS	NA	GT	0	0	0	0	0	0	0	0	0	0	0	0	0	0	0	0	0	0	0	0	0	0	0	0	0	0	0	0	0	0	0	0	0	0	0	0	0	0	0	0	0
NC_007530	1741958	TACTTGGCCC.ATTACTTGGT	A	T	40	PASS	NA	GT	0	0	0	0	0	0	0	0	0	1	0	0	0	0	0	0	0	0	0	0	0	0	0	0	0	0	0	0	0	0	0	0	0	0	0	0	0	0	0	0	0
NC_007530	1741964	GCCCATTACT.TGGTGGTTAT	T	A	40	PASS	NA	GT	0	0	0	0	0	0	0	0	0	1	0	0	0	0	0	0	0	0	0	0	0	0	0	0	0	0	0	0	0	0	0	0	0	0	0	0	0	0	0	0	0
NC_007530	1743839	ATTGCGCATG.GTATGACAGA	G	T	40	PASS	NA	GT	0	0	1	0	0	0	0	0	0	0	0	0	0	0	0	0	0	0	0	0	0	0	0	0	0	0	0	0	0	0	0	0	0	0	0	0	0	0	0	0	0
NC_007530	1744088	TCTTTCCTAT.CAAGACGAGC	C	T	40	PASS	NA	GT	0	0	0	0	0	0	0	0	1	0	0	0	0	0	0	0	0	0	0	0	0	0	0	0	0	0	0	0	0	0	0	0	0	0	0	0	0	0	0	0	0
NC_007530	1744789	ATATGAAATT.TGGAATTATC	T	C	40	PASS	NA	GT	0	0	0	0	0	0	0	0	1	0	0	0	0	0	0	0	0	0	0	0	0	0	0	0	0	0	0	0	0	0	0	0	0	0	0	0	0	0	0	0	0
NC_007530	1744994	CTTCAGAACT.TTAAGAACAA	T	C	40	PASS	NA	GT	0	0	0	0	0	0	0	0	0	0	0	0	0	1	0	0	0	0	0	0	0	0	0	0	0	0	0	0	0	0	0	0	0	0	0	0	0	0	0	0	0
NC_007530	1745277	AACCAAAAAA.CCTCTGAGTT	C	A	40	PASS	NA	GT	0	1	0	0	0	0	0	1	0	0	1	1	1	1	0	0	0	0	0	0	0	0	0	0	0	0	0	0	0	0	0	0	0	0	0	0	0	1	0	0	0
NC_007530	1746377	CGCAGCTAGA.AGGGCTACAT	A	T	40	PASS	NA	GT	0	0	0	0	0	0	0	0	0	1	0	0	0	0	0	0	0	0	0	0	0	0	0	0	0	0	0	0	0	0	0	0	0	0	0	0	0	0	0	0	0
NC_007530	1746399	TTTATATGAA.CCAGGTAAAC	C	T	40	PASS	NA	GT	0	0	0	0	0	1	0	0	0	0	0	0	0	0	0	0	0	0	0	0	0	0	0	0	0	0	0	0	0	0	0	0	0	0	0	0	0	0	0	0	0
NC_007530	1746540	AACAATTGTT.CCTCCAGATG	C	A	40	PASS	NA	GT	0	0	1	0	0	0	0	0	0	0	0	0	0	0	0	0	0	0	0	0	0	0	0	0	0	0	0	0	0	0	0	0	0	0	0	0	0	0	0	0	0
NC_007530	1746574	ATGGCACAGC.ATTTAATAGA	A	G	40	PASS	NA	GT	0	0	0	0	0	0	0	0	1	0	0	0	0	0	0	0	0	0	0	0	0	0	0	0	0	0	0	0	0	0	0	0	0	0	0	0	0	0	0	0	0
NC_007530	1746575	TGGCACAGCA.TTTAATAGAA	T	G	40	PASS	NA	GT	0	0	0	0	0	0	0	0	1	0	0	0	0	0	0	0	0	0	0	0	0	0	0	0	0	0	0	0	0	0	0	0	0	0	0	0	0	0	0	0	0
NC_007530	1746948	AGATATATAC.GGAAATGTGA	G	T	40	PASS	NA	GT	0	0	0	0	0	0	0	0	1	0	0	0	0	0	0	0	0	0	0	0	0	0	0	0	0	0	0	0	0	0	0	0	0	0	0	0	0	0	0	0	0
NC_007530	1748387	CGAAAGAATT.CAAATTATCT	C	A	40	PASS	NA	GT	0	0	1	0	0	0	0	0	0	0	0	0	0	0	0	0	0	0	0	0	0	0	0	0	0	0	0	0	0	0	0	0	0	0	0	0	0	0	0	0	0
NC_007530	1748642	CATGAAAGGA.AAGTGGGTTT	A	T	40	PASS	NA	GT	0	0	0	0	0	0	0	0	0	0	0	0	0	0	0	0	0	0	0	0	0	0	0	1	0	0	0	0	0	0	0	0	0	0	0	0	0	0	0	0	0
NC_007530	1749441	ATGCGTATCG.CAACATTATT	C	A	40	PASS	NA	GT	0	0	0	0	0	0	0	0	0	0	0	0	0	0	0	0	0	0	0	0	0	0	0	0	0	0	0	0	0	0	0	0	0	0	0	0	0	0	0	0	0
NC_007530	1749826	TCCACAGCCT.GTTTTTGTGT	G	A	40	PASS	NA	GT	0	0	0	0	0	0	0	0	0	0	0	0	0	0	0	0	0	0	0	0	0	0	0	0	0	0	0	0	0	0	0	0	0	0	0	0	0	0	0	0	0
NC_007530	1750262	CAAAATTGTA.GCCAGCTGGA	G	T	40	PASS	NA	GT	0	0	0	0	0	0	0	0	0	0	0	0	0	0	0	0	0	0	0	0	0	0	0	0	0	0	0	0	0	0	0	0	0	0	0	0	0	0	0	0	0
NC_007530	1750774	GGCTTATGTT.TCGGAATGGT	T	C	40	PASS	NA	GT	0	0	0	0	0	0	0	0	0	0	0	0	0	0	0	0	0	0	0	0	0	0	0	0	0	0	0	0	0	0	0	0	0	0	0	0	0	0	0	0	0
NC_007530	1750802	CTGGTAACGG.ATAGGTAGAA	A	G	40	PASS	NA	GT	0	0	0	0	0	0	0	0	1	0	0	0	0	0	0	0	0	0	0	0	0	0	0	0	0	0	0	0	0	0	0	0	0	0	0	0	0	0	0	0	0
NC_007530	1751042	TTTTTATCGC.GCTCCAGCCA	G	A	40	PASS	NA	GT	0	0	0	0	0	0	0	0	0	0	0	0	0	0	0	0	0	0	0	0	0	0	0	0	0	0	0	0	0	0	0	0	0	0	0	0	0	0	0	0	0
NC_007530	1751573	TCACTTGCTA.CTTGACCTGA	C	G	40	PASS	NA	GT	0	0	0	0	0	0	0	0	1	0	0	0	0	0	0	0	0	0	0	0	0	0	0	0	0	0	0	0	0	0	0	0	0	0	0	0	0	0	0	0	0
NC_007530	1753666	TAAGATTGAG.CAATTTATTT	C	T	40	PASS	NA	GT	0	0	0	0	0	0	0	0	0	0	0	0	0	0	0	0	0	0	0	0	0	0	0	0	0	0	0	0	0	0	0	0	0	0	0	0	0	0	0	0	0
NC_007530	1755892	TTATTGAGGG.CGTATCAAAA	C	T	40	PASS	NA	GT	0	0	0	0	0	0	0	0	0	0	0	0	0	0	0	0	0	0	0	0	0	0	0	0	0	0	0	0	0	0	0	0	0	0	0	0	0	0	0	0	0
NC_007530	1755984	TTTACTTCTC.GCATGCATAG	G	C	40	PASS	NA	GT	0	0	0	0	0	0	0	0	0	1	0	0	0	0	0	0	0	0	0	0	0	0	0	0	0	0	0	0	0	0	0	0	0	0	0	0	0	0	0	0	0
NC_007530	1757673	ATTTTAATAA.TAATCCATTT	T	A	40	PASS	NA	GT	0	0	0	0	0	0	0	0	0	0	0	0	0	1	0	0	0	0	0	0	0	0	0	0	0	0	0	0	0	0	0	0	0	0	0	0	0	0	0	0	0
NC_007530	1757682	ATAATCCATT.TATTGTAATA	T	A	40	PASS	NA	GT	0	0	0	0	0	0	0	0	0	0	0	0	0	1	0	0	0	0	0	0	0	0	0	0	0	0	0	0	0	0	0	0	0	0	0	0	0	0	0	0	0
NC_007530	1757684	AATCCATTTA.TTGTAATATG	T	A	40	PASS	NA	GT	0	0	0	0	0	0	0	0	0	0	0	0	0	1	0	0	0	0	0	0	0	0	0	0	0	0	0	0	0	0	0	0	0	0	0	0	0	0	0	0	0
NC_007530	1757685	ATCCATTTAT.TGTAATATGG	T	A	40	PASS	NA	GT	0	0	0	0	0	0	0	0	0	0	0	0	0	1	0	0	0	0	0	0	0	0	0	0	0	0	0	0	0	0	0	0	0	0	0	0	0	0	0	0	0
NC_007530	1757686	TCCATTTATT.GTAATATGGG	G	A	40	PASS	NA	GT	0	0	0	0	0	0	0	0	0	0	0	0	0	1	0	0	0	0	0	0	0	0	0	0	0	0	0	0	0	0	0	0	0	0	0	0	0	0	0	0	0
NC_007530	1757687	CCATTTATTG.TAATATGGGA	T	A	40	PASS	NA	GT	0	0	0	0	0	0	0	0	0	0	0	0	0	1	0	0	0	0	0	0	0	0	0	0	0	0	0	0	0	0	0	0	0	0	0	0	0	0	0	0	0
NC_007530	1757693	ATTGTAATAT.GGGAGTTAAC	G	A	40	PASS	NA	GT	0	0	0	0	0	0	0	0	0	0	0	0	0	0	0	0	0	0	0	0	0	0	0	0	0	0	0	0	0	0	0	0	0	0	0	0	0	0	0	0	0
NC_007530	1758612	ATCTTCGTAA.TCCTGACAAG	T	A	40	PASS	NA	GT	0	0	0	0	0	0	0	0	0	1	0	0	0	0	0	0	0	0	0	0	0	0	0	0	0	0	0	0	0	0	0	0	0	0	0	0	0	0	0	0	0
NC_007530	1758613	TCTTCGTAAT.CCTGACAAGT	C	A	40	PASS	NA	GT	0	0	0	0	0	0	0	0	0	1	0	0	0	0	0	0	0	0	0	0	0	0	0	0	0	0	0	0	0	0	0	0	0	0	0	0	0	0	0	0	0
NC_007530	1758614	CTTCGTAATC.CTGACAAGTA	C	A	40	PASS	NA	GT	0	0	0	0	0	0	0	0	0	1	0	0	0	0	0	0	0	0	0	0	0	0	0	0	0	0	0	0	0	0	0	0	0	0	0	0	0	0	0	0	0
NC_007530	1760887	TAGTAAATAT.GAAAGCGTTC	G	T	40	PASS	NA	GT	0	0	1	0	0	0	0	0	0	0	0	0	0	0	0	0	0	0	0	0	0	0	0	0	0	0	0	0	0	0	0	0	0	0	0	0	0	0	0	0	0
NC_007530	1762725	AGGACCGACT.AAGTTACTAA	A	C	40	PASS	NA	GT	0	0	0	0	0	0	0	0	1	0	0	0	0	0	0	0	0	0	0	0	0	0	0	0	0	0	0	0	0	0	0	0	0	0	0	0	0	0	0	0	0
NC_007530	1764020	GAGAAGGAAA.TGGGATTCAT	T	G	40	PASS	NA	GT	0	0	0	0	0	0	0	0	0	0	0	0	0	0	0	0	0	0	0	0	0	0	0	0	0	0	0	0	0	0	0	0	0	0	0	0	0	0	0	0	0
NC_007530	1764025	GGAAATGGGA.TTCATTTTCT	T	C	40	PASS	NA	GT	0	0	0	0	0	0	0	0	0	0	0	0	0	0	0	0	0	0	0	0	0	0	0	0	0	0	0	0	0	0	0	0	0	0	0	0	0	0	0	0	0
NC_007530	1764177	CAGAAGAATT.CGCGGCAGAG	C	A	40	PASS	NA	GT	0	0	1	0	0	0	0	0	0	0	0	0	0	0	0	0	0	0	0	0	0	0	0	0	0	0	0	0	0	0	0	0	0	0	0	0	0	0	0	0	0
NC_007530	1764485	GAAGCAATGA.AACAAGAAGA	A	T	40	PASS	NA	GT	0	0	0	0	0	0	0	0	1	0	0	0	0	0	0	0	0	0	0	0	0	0	0	0	0	0	0	0	0	0	0	0	0	0	0	0	0	0	0	0	0
NC_007530	1764578	ATCGAATCAT.TCCGTGAATT	T	A	40	PASS	NA	GT	0	0	0	0	0	0	0	0	1	0	0	0	0	0	0	0	0	0	0	0	0	0	0	0	0	0	0	0	0	0	0	0	0	0	0	0	0	0	0	0	0
NC_007530	1765915	TCGCGTTCTC.CTTCATTTGT	C	T	40	PASS	NA	GT	0	0	0	0	0	0	0	0	0	0	0	0	0	0	0	0	0	0	0	0	0	0	0	0	0	0	0	0	0	0	0	0	0	0	0	0	0	0	0	0	0
NC_007530	1768977	GTTATATGTA.TTACCATCTT	T	C	40	PASS	NA	GT	0	0	0	0	1	1	0	0	0	0	0	0	0	0	0	0	0	0	0	0	0	0	0	0	0	0	0	0	0	0	0	0	0	0	0	0	0	0	0	0	0
NC_007530	1769506	TTGCAAAAGA.TAAGTTTATA	T	C	40	PASS	NA	GT	0	0	0	0	0	0	0	0	0	0	0	0	0	0	0	0	0	0	1	0	0	0	0	0	0	0	0	0	0	0	0	0	0	0	0	0	0	0	0	0	0
NC_007530	1770845	ATGAGAACGT.TCTCTATTTT	T	C	40	PASS	NA	GT	0	0	0	0	0	0	0	0	0	0	0	0	0	0	0	0	0	0	0	0	0	0	0	0	0	0	0	0	0	0	0	0	0	0	0	0	0	0	0	0	0
NC_007530	1771556	GATATTAAAA.GAATTCAAGG	G	T	40	PASS	NA	GT	0	0	1	0	0	0	0	0	0	0	0	0	0	0	0	0	0	0	0	0	0	0	0	0	0	0	0	0	0	0	0	0	0	0	0	0	0	0	0	0	0
NC_007530	1771877	TTTACAGAAC.TAATTGATCG	T	A	40	PASS	NA	GT	0	0	0	0	0	0	0	0	0	0	0	0	0	1	0	0	0	0	0	0	0	0	0	0	0	0	0	0	0	0	0	0	0	0	0	0	0	0	0	0	0
NC_007530	1772960	GGCTGTAGGC.GGTGGTACAG	G	T	40	PASS	NA	GT	0	0	1	0	0	0	0	0	0	0	0	0	0	0	0	0	0	0	0	0	0	0	0	0	0	0	0	0	0	0	0	0	0	0	0	0	0	0	0	0	0
NC_007530	1774982	TTAAATATGC.TGGGGCTTTG	T	G	40	PASS	NA	GT	0	0	0	0	0	0	0	0	0	0	0	0	0	0	0	0	0	0	0	0	0	0	0	0	0	0	0	0	0	0	0	0	0	0	0	0	0	0	0	0	0
NC_007530	1776654	TCAGCATACG.GCGAAAGAAT	G	A	40	LCB	NA	GT	0	0	0	0	0	0	0	0	0	0	0	0	0	0	0	0	0	0	0	0	0	0	0	1	0	0	0	0	0	0	0	0	0	0	0	0	0	0	0	0	0
NC_007530	1780593	TGTAGACAAG.TAATTGCTGA	T	C	40	PASS	NA	GT	0	0	0	0	0	0	0	0	0	0	0	0	0	0	0	0	0	0	0	0	0	0	0	0	0	0	0	0	0	0	0	0	0	0	0	0	0	0	0	0	0
NC_007530	1780762	CTTTTTGTTT.GGAACATACA	G	A	40	PASS	NA	GT	0	0	0	0	0	0	0	0	0	0	0	0	0	0	0	0	0	0	0	0	0	0	0	0	1	1	0	1	0	0	0	0	0	0	0	0	0	0	0	0	0
NC_007530	1781303	AATGTATAGT.TATTGTAACC	T	C	40	PASS	NA	GT	0	0	0	0	1	0	0	0	0	0	0	0	0	0	0	0	0	0	0	0	0	0	0	0	0	0	0	0	0	0	0	0	0	0	0	0	0	0	0	0	0
NC_007530	1781387	GATGTAAATG.ACTATTAATA	A	G	40	PASS	NA	GT	0	0	0	0	0	0	0	0	0	0	0	0	0	0	0	0	0	0	0	0	0	0	0	0	0	0	0	0	0	0	0	0	0	0	0	0	0	0	0	0	0
NC_007530	1783185	GTTGAAAACA.CGTTATATTC	C	T	40	PASS	NA	GT	0	0	0	0	0	0	0	0	0	0	0	0	0	0	0	0	0	0	0	0	0	0	0	0	0	0	0	0	1	0	0	0	0	0	0	0	0	0	0	0	0
NC_007530	1783640	TTGTCCGTTG.TTTGTACTGA	T	C	40	PASS	NA	GT	0	0	0	0	0	0	0	0	1	0	0	0	0	0	0	0	0	0	0	0	0	0	0	0	0	0	0	0	0	0	0	0	0	0	0	0	0	0	0	0	0
NC_007530	1785506	GGTTATTACA.ATTGAACCTG	A	C	40	PASS	NA	GT	0	0	0	0	0	0	0	0	1	0	0	0	0	0	0	0	0	0	0	0	0	0	0	0	0	0	0	0	0	0	0	0	0	0	0	0	0	0	0	0	0
NC_007530	1785700	AATCAGGAAA.GGCGCTCAAT	G	T	40	PASS	NA	GT	0	0	0	0	0	0	0	0	0	1	0	0	0	0	0	0	0	0	0	0	0	0	0	0	0	0	0	0	0	0	0	0	0	0	0	0	0	0	0	0	0
NC_007530	1786390	ATAAAGAAGA.GATGAATAAA	G	A	40	PASS	NA	GT	0	0	0	0	0	0	0	0	0	0	0	0	0	0	0	0	0	0	0	0	0	0	0	0	0	0	0	0	0	0	0	0	0	0	0	0	0	0	0	0	0
NC_007530	1788706	AAGTACTTCC.CATACGATTT	C	G	40	PASS	NA	GT	0	0	0	0	0	0	0	0	1	0	0	0	0	0	0	0	0	0	0	0	0	0	0	0	0	0	0	0	0	0	0	0	0	0	0	0	0	0	0	0	0
NC_007530	1789341	CAGAGAAGCA.GCGGCAATCC	G	A	40	PASS	NA	GT	0	0	0	0	0	0	0	0	0	0	0	0	0	0	0	0	0	0	0	0	0	0	0	0	0	0	0	0	0	0	0	0	0	0	0	0	0	0	0	0	0
NC_007530	1791799	AGATTCCAAC.TATGTTACAC	T	C	40	PASS	NA	GT	0	0	0	0	0	0	0	0	1	0	0	0	0	0	0	0	0	0	0	0	0	0	0	0	0	0	0	0	0	0	0	0	0	0	0	0	0	0	0	0	0
NC_007530	1792946	AATAAGATTA.ATTTTGTGTT	A	G	40	PASS	NA	GT	0	0	0	0	0	0	0	0	0	0	0	0	0	0	0	0	0	0	0	0	0	0	0	0	0	0	0	0	0	0	0	0	0	0	0	0	0	0	0	0	0
NC_007530	1795583	TGAATGAATC.CTTTCTAAAT	C	T	40	PASS	NA	GT	0	0	0	0	0	0	0	0	0	0	0	0	0	0	0	0	0	0	0	0	0	0	0	0	0	0	0	0	0	0	0	0	0	0	0	0	0	0	0	0	0
NC_007530	1796249	ACTGTACCAG.CACCATTAAT	C	T	40	PASS	NA	GT	0	0	0	0	0	0	0	0	1	0	0	0	0	0	0	0	0	0	0	0	0	0	0	0	0	0	0	0	0	0	0	0	0	0	0	0	0	0	0	0	0
NC_007530	1796250	CTGTACCAGC.ACCATTAATC	A	C	40	PASS	NA	GT	0	0	0	0	0	0	0	0	1	0	0	0	0	0	0	0	0	0	0	0	0	0	0	0	0	0	0	0	0	0	0	0	0	0	0	0	0	0	0	0	0
NC_007530	1796279	TCATATTTAT.CTCAAGCTGG	C	T	40	PASS	NA	GT	0	0	0	0	0	0	0	0	1	0	0	0	0	0	0	0	0	0	0	0	0	0	0	0	0	0	0	0	0	0	0	0	0	0	0	0	0	0	0	0	0
NC_007530	1796280	CATATTTATC.TCAAGCTGGA	T	G	40	PASS	NA	GT	0	0	0	0	0	0	0	0	1	0	0	0	0	0	0	0	0	0	0	0	0	0	0	0	0	0	0	0	0	0	0	0	0	0	0	0	0	0	0	0	0
NC_007530	1796610	ATGTTGGTTT.TTTAGTCTAT	T	C	40	PASS	NA	GT	0	0	0	0	0	0	0	0	0	0	0	0	0	0	0	0	0	0	0	0	0	0	0	0	0	0	0	0	0	0	0	0	0	0	0	0	0	0	0	0	0
NC_007530	1796644	ATGTATATTT.ATAAAATGAA	A	G	40	PASS	NA	GT	0	0	0	0	0	0	0	0	0	0	0	0	0	0	0	0	0	0	0	0	0	0	1	0	0	0	0	0	0	0	1	0	0	0	0	0	0	0	0	0	0
NC_007530	1798709	ACATCTTTTT.ATTTATGTAT	A	G	40	LCB	NA	GT	0	0	0	0	0	0	0	0	0	0	0	0	0	0	0	0	0	0	0	0	0	0	0	0	0	0	0	0	0	0	0	0	0	0	0	0	0	0	0	0	0
NC_007530	1799640	TGTTTCATGG.CTAGAAGCAT	C	T	40	PASS	NA	GT	0	0	0	0	0	0	0	0	0	0	0	0	0	0	0	0	0	0	0	0	0	0	0	1	0	0	0	0	0	0	0	0	0	0	0	0	0	0	0	0	0
NC_007530	1800335	AATTAGATAA.TGGATATGAA	T	C	40	PASS	NA	GT	0	0	0	0	0	0	0	0	0	0	0	0	0	0	0	0	0	0	0	0	0	0	1	0	0	0	0	0	0	0	1	0	0	0	0	0	0	0	0	0	0
NC_007530	1800431	CTGTTACTGA.TATGGAACAA	T	C	40	PASS	NA	GT	0	0	0	0	0	0	0	0	0	1	0	0	0	0	0	0	0	0	0	0	0	0	0	0	0	0	0	0	0	0	0	0	0	0	0	0	0	0	0	0	0
NC_007530	1801404	TCTCATTGAA.AATAATGAGA	A	T	40	PASS	NA	GT	0	0	0	0	0	0	0	0	0	0	0	0	0	0	0	0	0	0	0	0	0	0	0	0	0	0	0	0	0	0	0	0	0	0	0	0	0	0	0	0	0
NC_007530	1802225	CCCATGAATA.AAAACCATAA	A	G	40	PASS	NA	GT	0	0	0	0	0	0	0	0	1	0	0	0	0	0	0	0	0	0	0	0	0	0	0	0	0	0	0	0	0	0	0	0	0	0	0	0	0	0	0	0	0
NC_007530	1804349	AGAGGTGTCT.CGTATATTAT	C	T	40	PASS	NA	GT	0	0	0	0	0	0	0	0	0	0	0	0	0	0	0	0	0	0	0	0	0	0	0	0	0	0	0	0	0	0	0	0	0	0	0	0	0	0	0	0	0
NC_007530	1804618	CTGGCTTTGT.TTACGTAAAT	T	G	40	PASS	NA	GT	0	0	0	0	0	0	0	0	0	0	0	0	0	0	0	0	0	0	0	0	0	0	0	0	0	0	0	0	0	0	0	0	0	0	0	0	0	0	0	0	0
NC_007530	1805647	AATTATAAAA.CAAACATTTG	C	A	40	PASS	NA	GT	0	0	0	0	0	0	0	0	0	0	0	0	0	1	0	0	0	0	0	0	0	0	0	0	0	0	0	0	0	0	0	0	0	0	0	0	0	0	0	0	0
NC_007530	1805690	ACAACAAACT.TAAAAGAAGC	T	A	40	PASS	NA	GT	0	0	0	0	0	0	0	0	0	0	0	0	0	1	0	0	0	0	0	0	0	0	0	0	0	0	0	0	0	0	0	0	0	0	0	0	0	0	0	0	0
NC_007530	1806429	CAGTGGTAGG.TACTGATGTT	T	G	40	PASS	NA	GT	0	0	0	0	0	0	0	0	0	1	0	0	0	0	0	0	0	0	0	0	0	0	0	0	0	0	0	0	0	0	0	0	0	0	0	0	0	0	0	0	0
NC_007530	1806431	GTGGTAGGTA.CTGATGTTGA	C	G	40	PASS	NA	GT	0	0	0	0	0	0	0	0	0	1	0	0	0	0	0	0	0	0	0	0	0	0	0	0	0	0	0	0	0	0	0	0	0	0	0	0	0	0	0	0	0
NC_007530	1806601	AACTCTCTTT.TTCGTATAAA	T	A	40	PASS	NA	GT	0	0	0	0	0	0	0	0	0	0	0	0	0	0	0	0	0	0	0	0	0	0	0	0	0	0	0	0	0	0	0	0	0	0	0	0	0	0	0	0	0
NC_007530	1806860	GCGACTGTAG.ATGAGCTTCA	A	G	40	PASS	NA	GT	0	0	0	0	0	0	0	0	0	1	0	0	0	0	0	0	0	0	0	0	0	0	0	0	0	0	0	0	0	0	0	0	0	0	0	0	0	0	0	0	0
NC_007530	1807120	TGCAGGAACT.TATGTATTAA	T	C	40	PASS	NA	GT	0	0	0	0	0	0	0	0	0	0	0	0	0	0	0	0	0	0	1	0	0	0	0	0	0	0	0	0	0	0	0	0	0	0	0	0	0	0	0	0	0
NC_007530	1810849	ATCCGTGAAC.CGTTTAGCAG	C	T	40	PASS	NA	GT	0	0	0	0	0	0	0	0	0	0	0	0	0	0	0	0	0	0	0	0	0	0	0	0	0	0	0	0	0	0	0	0	0	0	0	0	0	0	0	0	0
NC_007530	1814297	TTATATTACT.ATATTACGGT	A	G	40	PASS	NA	GT	0	0	0	0	0	0	0	0	0	0	0	0	0	0	0	0	0	0	0	0	0	0	0	0	0	0	0	0	0	0	0	0	0	0	0	0	0	0	0	0	0
NC_007530	1814302	TTACTATATT.ACGGTTTTGT	A	T	40	PASS	NA	GT	0	0	0	0	0	0	0	0	0	0	0	0	0	1	0	0	0	0	0	0	0	0	0	0	0	0	0	0	0	0	0	0	0	0	0	0	0	0	0	0	0
NC_007530	1814340	CATAATATTG.CTTAAATGTA	C	T	40	PASS	NA	GT	0	0	0	0	0	0	0	0	0	0	0	0	0	1	0	0	0	0	0	0	0	0	0	0	0	0	0	0	0	0	0	0	0	0	0	0	0	0	0	0	0
NC_007530	1814343	AATATTGCTT.AAATGTATAT	A	T	40	PASS	NA	GT	0	0	0	0	0	0	0	0	0	0	0	0	0	1	0	0	0	0	0	0	0	0	0	0	0	0	0	0	0	0	0	0	0	0	0	0	0	0	0	0	0
NC_007530	1814351	TTAAATGTAT.ATGGTGTTAT	A	T	40	PASS	NA	GT	0	0	0	0	0	0	0	0	0	0	0	0	0	1	0	0	0	0	0	0	0	0	0	0	0	0	0	0	0	0	0	0	0	0	0	0	0	0	0	0	0
NC_007530	1814536	ATTCAGAAAT.ATATTCATAA	A	G	40	PASS	NA	GT	0	0	0	0	0	0	0	0	0	0	0	0	0	0	0	0	0	1	0	0	0	0	0	0	0	0	0	0	0	0	0	0	0	0	0	0	0	0	0	0	0
NC_007530	1814541	GAAATATATT.CATAATCAAA	C	T	40	PASS	NA	GT	0	1	1	1	1	1	1	1	1	1	1	1	1	1	1	1	1	1	1	1	1	1	1	1	1	1	1	1	1	1	1	1	1	1	1	1	1	1	1	1	1
NC_007530	1814566	GAGGTGATTC.AGGTGTCAGA	A	G	40	PASS	NA	GT	0	0	0	0	0	0	0	0	0	0	0	0	0	0	0	0	0	0	0	0	0	0	0	1	0	0	0	0	0	0	0	0	0	0	0	0	0	0	0	0	0
NC_007530	1815198	GCAAGGCATT.GCTTATTGGA	G	A	40	PASS	NA	GT	0	0	0	0	0	0	0	0	0	1	0	0	0	0	0	0	0	0	0	0	0	0	0	0	0	0	0	0	0	0	0	0	0	0	0	0	0	0	0	0	0
NC_007530	1816586	ATAAAATACC.GAAAGAAATT	G	T	40	PASS	NA	GT	0	0	1	0	0	0	0	0	0	0	0	0	0	0	0	0	0	0	0	0	0	0	0	0	0	0	0	0	0	0	0	0	0	0	0	0	0	0	0	0	0
NC_007530	1817234	ATGTCGCAGA.CGAAATGATG	C	A	40	PASS	NA	GT	0	0	0	0	0	0	0	0	1	0	0	0	0	0	0	0	0	0	0	0	0	0	0	0	0	0	0	0	0	0	0	0	0	0	0	0	0	0	0	0	0
NC_007530	1817252	TGCATGCATC.AGATTTAGCT	A	C	40	PASS	NA	GT	0	0	0	0	0	0	0	0	0	0	0	0	0	0	0	0	0	0	0	0	0	0	0	0	0	0	0	0	0	0	0	0	0	0	0	0	0	0	0	0	0
NC_007530	1828113	TGCATTCTTT.ATTGCAGGTG	A	G	40	PASS	NA	GT	0	0	0	0	0	0	0	0	0	0	0	0	0	0	0	0	0	0	0	0	0	0	0	0	0	0	0	0	0	0	0	0	0	0	0	0	0	0	0	0	0
NC_007530	1828266	TAAGACACAC.CCAATGAAAA	C	T	40	PASS	NA	GT	0	0	0	0	0	0	0	0	1	0	0	0	0	0	0	0	0	0	0	0	0	0	0	0	0	0	0	0	0	0	0	0	0	0	0	0	0	0	0	0	0
NC_007530	1832421	ATTTCAATGA.TCGTATGGAC	T	C	40	PASS	NA	GT	0	0	0	0	0	0	0	0	1	0	0	0	0	0	0	0	0	0	0	0	0	0	0	0	0	0	0	0	0	0	0	0	0	0	0	0	0	0	0	0	0
NC_007530	1832466	ATTGCACCTA.CTGTTATTGC	C	G	40	PASS	NA	GT	0	0	0	0	0	0	0	0	0	1	0	0	0	0	0	0	0	0	0	0	0	0	0	0	0	0	0	0	0	0	0	0	0	0	0	0	0	0	0	0	0
NC_007530	1833014	TTCGCATATT.GCTTCTCTTC	G	A	40	PASS	NA	GT	0	0	0	0	0	0	0	0	0	0	0	0	0	0	0	0	0	0	0	0	0	0	0	0	0	0	0	0	0	0	0	0	0	0	0	0	0	0	1	0	0
NC_007530	1833130	CACCAATCAT.GGTACTAGAT	G	T	40	PASS	NA	GT	0	1	1	1	1	1	1	1	1	1	1	1	1	1	1	1	1	1	1	1	1	1	1	1	1	1	1	1	1	1	1	1	1	1	1	1	1	1	1	1	1
NC_007530	1834717	ATGTTTTCCA.AGAATAATGC	A	C	40	PASS	NA	GT	0	0	0	0	0	0	0	0	0	0	0	0	0	1	0	0	0	0	0	0	0	0	0	0	0	0	0	0	0	0	0	0	0	0	0	0	0	0	0	0	0
NC_007530	1835115	CAAGTGCCGG.GCCGTAAAAT	G	A	40	PASS	NA	GT	0	1	1	1	1	1	1	1	1	1	1	1	1	1	1	1	1	1	1	1	1	1	1	1	1	1	1	1	1	1	1	1	1	1	1	1	1	1	1	1	1
NC_007530	1835473	GTAAATCCCA.ATTGTGTCTC	A	T	40	PASS	NA	GT	0	0	0	0	0	0	0	0	0	0	0	0	0	1	0	0	0	0	0	0	0	0	0	0	0	0	0	0	0	0	0	0	0	0	0	0	0	0	0	0	0
NC_007530	1837085	GAATGCATTT.AAAAGTGGTT	A	G	40	PASS	NA	GT	0	0	0	0	0	0	0	0	0	0	0	0	0	0	0	0	0	0	0	0	0	0	1	0	0	0	0	0	0	0	1	0	0	0	0	0	0	0	0	0	0
NC_007530	1838268	TTGATAATAT.TGTAAAGTAT	T	N	40	N	NA	GT	0	0	0	0	0	0	0	0	0	0	0	0	0	0	0	0	0	0	0	0	0	0	0	0	0	0	0	0	0	0	0	0	0	0	0	0	0	0	0	0	0
NC_007530	1838303	TTTAAAAGAG.GATAGTAGGG	G	A	40	PASS	NA	GT	0	0	0	0	0	0	0	0	0	0	0	0	0	0	0	1	0	0	0	0	0	0	0	0	0	0	0	0	0	0	0	0	0	0	0	0	0	0	0	0	0
NC_007530	1840160	AATGCTTAAT.ACTTTTTCTG	A	C	40	PASS	NA	GT	0	0	0	0	0	0	0	0	0	0	0	0	0	1	0	0	0	0	0	0	0	0	0	0	0	0	0	0	0	0	0	0	0	0	0	0	0	0	0	0	0
NC_007530	1840483	TCAATAACTG.GAGATTTATA	G	T	40	PASS	NA	GT	0	0	0	0	0	0	0	0	0	0	0	0	0	1	0	0	0	0	0	0	0	0	0	0	0	0	0	0	0	0	0	0	0	0	0	0	0	0	0	0	0
NC_007530	1840526	TAATTCACAT.AGAATAATAT	A	C	40	PASS	NA	GT	0	0	0	0	0	0	0	0	0	0	0	0	0	1	0	0	0	0	0	0	0	0	0	0	0	0	0	0	0	0	0	0	0	0	0	0	0	0	0	0	0
NC_007530	1840586	AAAGATGAGT.TTTTATGTAT	T	C	40	PASS	NA	GT	0	0	0	0	0	0	0	0	0	0	0	0	0	0	0	0	0	0	0	0	0	0	0	0	0	0	0	0	0	0	0	0	0	0	0	0	0	0	0	0	0
NC_007530	1840587	AAGATGAGTT.TTTATGTATA	T	C	40	PASS	NA	GT	0	0	0	0	0	0	0	0	0	0	0	0	0	0	0	0	0	0	0	0	0	0	0	0	0	0	0	0	0	0	0	0	0	0	0	0	0	0	0	0	0
NC_007530	1841835	CAAGTGGTAG.TGGGAAAACG	T	C	40	PASS	NA	GT	0	1	1	1	1	1	1	1	1	1	1	1	1	1	1	1	1	1	1	1	1	1	1	1	1	1	1	1	1	1	1	1	1	1	1	1	1	1	1	1	1
NC_007530	1842313	ACATAGACTG.TCTACTGTTG	T	C	40	PASS	NA	GT	0	0	0	0	0	0	0	0	0	0	0	0	0	0	0	0	0	0	0	0	0	0	0	0	0	0	0	0	0	0	0	0	0	0	0	0	0	0	0	0	0
NC_007530	1842839	TGGTACGGAT.GATTATCTTG	G	A	40	PASS	NA	GT	0	0	0	0	0	0	0	0	0	0	0	0	0	0	0	0	0	0	0	0	0	0	0	0	0	0	0	0	0	0	0	0	0	0	0	0	0	0	0	0	0
NC_007530	1845292	TGCAACTGCT.GATGTTTCTT	G	T	40	PASS	NA	GT	0	0	1	0	0	0	0	0	0	0	0	0	0	0	0	0	0	0	0	0	0	0	0	0	0	0	0	0	0	0	0	0	0	0	0	0	0	0	0	0	0
NC_007530	1846325	AGACTTTGAT.ATTATTTACG	A	G	40	PASS	NA	GT	0	0	0	0	0	0	0	0	1	0	0	0	0	0	0	0	0	0	0	0	0	0	0	0	0	0	0	0	0	0	0	0	0	0	0	0	0	0	0	0	0
NC_007530	1846964	CGAAATTGCT.AACGCTTATG	A	G	40	PASS	NA	GT	0	1	0	0	0	0	0	1	0	0	1	1	1	1	0	0	0	0	0	0	0	0	0	0	0	0	0	0	0	0	0	0	0	0	0	0	0	1	0	0	0
NC_007530	1847691	CGTTTAGCTG.GGTATGCACC	G	A	40	PASS	NA	GT	0	0	0	0	0	0	0	0	0	1	0	0	0	0	0	0	0	0	0	0	0	0	0	0	0	0	0	0	0	0	0	0	0	0	0	0	0	0	0	0	0
NC_007530	1851344	ATCAGATCCG.ACAGCGGATG	A	G	40	PASS	NA	GT	0	0	0	0	0	0	0	0	0	1	0	0	0	0	0	0	0	0	0	0	0	0	0	0	0	0	0	0	0	0	0	0	0	0	0	0	0	0	0	0	0
NC_007530	1851810	GTTTCGAAAT.ATTTCTTACG	A	G	40	PASS	NA	GT	0	0	0	0	0	0	0	0	0	1	0	0	0	0	0	0	0	0	0	0	0	0	0	0	0	0	0	0	0	0	0	0	0	0	0	0	0	0	0	0	0
NC_007530	1853023	GATATCGCAA.TTTCTTCTAA	T	G	40	PASS	NA	GT	0	0	0	0	0	0	0	0	1	0	0	0	0	0	0	0	0	0	0	0	0	0	0	0	0	0	0	0	0	0	0	0	0	0	0	0	0	0	0	0	0
NC_007530	1854013	AGCTAGCATC.GCTAGCTTTC	G	C	40	PASS	NA	GT	0	0	0	0	0	0	0	0	0	0	0	0	0	0	0	0	0	0	0	0	0	0	0	0	0	0	0	0	0	0	0	0	0	0	0	0	0	0	0	0	0
NC_007530	1854523	CCTTGTATAT.TCAGTGGTGG	T	C	40	PASS	NA	GT	0	0	0	0	0	0	0	0	1	0	0	0	0	0	0	0	0	0	0	0	0	0	0	0	0	0	0	0	0	0	0	0	0	0	0	0	0	0	0	0	0
NC_007530	1854621	TAAAAGGTAG.TAATGCTGTA	T	C	40	PASS	NA	GT	0	0	0	0	0	0	0	0	1	0	0	0	0	0	0	0	0	0	0	0	0	0	0	0	0	0	0	0	0	0	0	0	0	0	0	0	0	0	0	0	0
NC_007530	1854877	ATCGACTGGT.GCAGAAAGTT	G	C	40	PASS	NA	GT	0	0	0	0	0	0	0	0	0	1	0	0	0	0	0	0	0	0	0	0	0	0	0	0	0	0	0	0	0	0	0	0	0	0	0	0	0	0	0	0	0
NC_007530	1854895	TTTTACGTGG.CCGAAAGTAC	C	G	40	PASS	NA	GT	0	0	0	0	0	0	0	0	0	1	0	0	0	0	0	0	0	0	0	0	0	0	0	0	0	0	0	0	0	0	0	0	0	0	0	0	0	0	0	0	0
NC_007530	1855679	CTCGGTGATG.CGGTTGAAGA	C	T	40	PASS	NA	GT	0	0	1	1	1	1	1	0	0	0	0	0	0	0	0	0	1	0	0	0	0	1	0	0	0	0	0	0	0	0	0	0	0	0	0	0	0	0	0	0	0
NC_007530	1856464	CAATGATGCT.GTAATTACAA	G	A	40	PASS	NA	GT	0	0	0	0	0	0	0	0	1	0	0	0	0	0	0	0	0	0	0	0	0	0	0	0	0	0	0	0	0	0	0	0	0	0	0	0	0	0	0	0	0
NC_007530	1857360	TATTAGCAAC.AATTAATAAA	A	G	40	PASS	NA	GT	0	0	0	0	0	0	0	0	0	1	0	0	0	0	0	0	0	0	0	0	0	0	0	0	0	0	0	0	0	0	0	0	0	0	0	0	0	0	0	0	0
NC_007530	1858545	AATTTAATGG.TGGAGATGTA	T	C	40	PASS	NA	GT	0	0	0	0	0	0	0	0	0	0	0	0	0	0	0	0	0	0	0	0	0	0	1	0	0	0	0	0	0	0	0	0	0	0	0	0	0	0	0	0	0
NC_007530	1859198	TATTATGTGA.AAATTCCTAA	A	T	40	PASS	NA	GT	0	0	0	0	0	0	0	0	0	1	0	0	0	0	0	0	0	0	0	0	0	0	0	0	0	0	0	0	0	0	0	0	0	0	0	0	0	0	0	0	0
NC_007530	1859871	TCTGGTCCGT.TTTTATTAAA	T	C	40	PASS	NA	GT	0	0	0	0	0	0	0	0	1	0	0	0	0	0	0	0	0	0	0	0	0	0	0	0	0	0	0	0	0	0	0	0	0	0	0	0	0	0	0	0	0
NC_007530	1859895	ATAGAAGAAA.GATTATATAA	G	C	40	PASS	NA	GT	0	0	0	0	0	0	0	0	1	0	0	0	0	0	0	0	0	0	0	0	0	0	0	0	0	0	0	0	0	0	0	0	0	0	0	0	0	0	0	0	0
NC_007530	1860309	GATTTTTCTC.TGAATACAAT	T	C	40	PASS	NA	GT	0	0	0	0	0	0	0	0	1	0	0	0	0	0	0	0	0	0	0	0	0	0	0	0	0	0	0	0	0	0	0	0	0	0	0	0	0	0	0	0	0
NC_007530	1863326	TTATTCATCG.GGATAGATAG	G	A	40	PASS	NA	GT	0	0	0	0	0	0	0	0	0	1	0	0	0	0	0	0	0	0	0	0	0	0	0	0	0	0	0	0	0	0	0	0	0	0	0	0	0	0	0	0	0
NC_007530	1863463	AAATATGGAT.CCCATGCGTT	C	T	40	PASS	NA	GT	0	0	0	0	0	0	0	0	0	0	0	0	0	0	0	0	0	0	0	0	0	0	0	0	0	0	0	1	0	0	0	0	0	0	0	0	0	0	0	0	0
NC_007530	1864349	ACAAGAGTAT.CAAGGAATGA	C	T	40	PASS	NA	GT	0	0	0	0	1	1	0	0	0	0	0	0	0	0	0	0	0	0	0	0	0	0	0	0	0	0	0	0	0	0	0	0	0	0	0	0	0	0	0	0	0
NC_007530	1864502	TACGAAATTT.TTAGAGCGAG	T	A	40	PASS	NA	GT	0	0	0	0	0	0	0	0	0	0	0	0	0	0	0	0	0	0	0	0	0	0	0	0	0	0	0	0	0	0	0	0	0	0	0	0	0	0	0	0	0
NC_007530	1865362	GCATCCAACT.CCAAAGAGTA	C	T	40	PASS	NA	GT	0	1	0	0	0	0	0	1	0	0	1	1	1	1	0	0	0	0	0	0	0	0	0	0	0	0	0	0	0	0	0	0	0	0	0	0	0	1	0	0	0
NC_007530	1865579	GAAGATGAAT.ATTCATTACT	A	T	40	PASS	NA	GT	0	0	0	0	0	0	0	0	0	0	0	0	0	0	0	0	0	0	0	0	0	0	0	0	0	0	0	0	0	0	0	0	0	0	0	0	0	0	0	0	0
NC_007530	1866693	TACAAATAAT.GGCATTTTAT	G	A	40	PASS	NA	GT	0	0	0	0	0	0	0	0	0	0	0	0	0	0	0	0	0	0	0	0	0	0	0	0	0	0	0	0	0	0	1	0	0	0	0	0	0	0	0	0	0
NC_007530	1867246	AATATCGAGA.CAATTTTCGA	C	T	40	PASS	NA	GT	0	0	0	0	0	0	0	0	0	0	0	0	0	0	0	0	0	1	0	0	0	0	0	0	0	0	0	0	0	0	0	0	0	0	0	0	0	0	0	0	0
NC_007530	1869365	CGAGTATAAG.TATAGGTTCA	T	C	40	PASS	NA	GT	0	0	0	0	0	0	0	0	0	1	0	0	0	0	0	0	0	0	0	0	0	0	0	0	0	0	0	0	0	0	0	0	0	0	0	0	0	0	0	0	0
NC_007530	1869461	CTGAGCGTGG.GCTTCATTTT	G	A	40	PASS	NA	GT	0	0	0	0	0	0	0	0	0	0	0	0	0	0	0	0	0	0	0	0	0	0	0	0	0	0	0	0	0	0	0	0	0	0	1	1	0	0	0	0	0
NC_007530	1870683	AGCTGAAAAA.CTTAATTATA	C	T	40	PASS	NA	GT	0	0	0	0	0	0	0	0	0	0	0	0	0	0	0	0	0	0	0	0	0	0	0	0	0	0	0	0	0	0	0	0	0	0	0	0	0	0	0	0	0
NC_007530	1871952	TATAAAATGA.TGAAAGAGTC	T	C	40	PASS	NA	GT	0	0	0	0	0	0	0	0	1	0	0	0	0	0	0	0	0	0	0	0	0	0	0	0	0	0	0	0	0	0	0	0	0	0	0	0	0	0	0	0	0
NC_007530	1871964	AAAGAGTCTC.TCATTGTAGA	T	C	40	PASS	NA	GT	0	0	0	0	0	0	0	0	0	0	0	0	0	0	0	0	0	0	0	0	0	0	0	0	0	0	0	0	0	0	0	0	0	0	0	0	0	0	0	0	0
NC_007530	1871967	GAGTCTCTCA.TTGTAGAGAC	T	G	40	PASS	NA	GT	0	0	0	0	0	0	0	0	0	0	0	0	0	0	0	0	0	0	0	0	0	0	0	0	0	0	0	0	0	0	0	0	0	0	0	0	0	0	0	0	0
NC_007530	1871969	GTCTCTCATT.GTAGAGACTC	G	T	40	PASS	NA	GT	0	0	0	0	0	0	0	0	0	0	0	0	0	0	0	0	0	0	0	0	0	0	0	0	0	0	0	0	0	0	0	0	0	0	0	0	0	0	0	0	0
NC_007530	1871974	TCATTGTAGA.GACTCTTTTT	G	A	40	PASS	NA	GT	0	0	0	0	0	0	0	0	0	0	0	0	0	0	0	0	0	0	0	0	0	0	0	0	0	0	0	0	0	0	0	0	0	0	0	0	0	0	0	0	0
NC_007530	1874408	CTATTTAAAT.TTATTATGAT	T	C	40	PASS	NA	GT	0	0	0	0	0	0	0	0	0	0	0	0	0	0	0	0	0	0	0	0	0	0	0	1	0	0	0	0	0	0	0	0	0	0	0	0	0	0	0	0	0
NC_007530	1875380	TACTTATATC.AGAAGCGATA	A	G	40	PASS	NA	GT	0	0	0	0	0	0	0	0	0	0	0	0	0	0	0	0	0	0	0	0	0	0	0	0	0	1	0	0	0	0	0	0	0	0	0	0	0	0	0	0	0
NC_007530	1876996	CTTGTAAAAA.GAACAACCTT	G	C	40	PASS	NA	GT	0	0	0	0	0	0	0	0	0	0	0	0	0	0	0	0	0	0	0	0	0	0	0	0	0	0	0	0	0	0	0	0	0	0	0	0	0	0	0	0	0
NC_007530	1877294	GATTGATAAT.CGAGAAGAAA	C	T	40	PASS	NA	GT	0	0	0	0	0	0	0	0	0	0	0	0	0	1	0	0	0	0	0	0	0	0	0	0	0	0	0	0	0	0	0	0	0	0	0	0	0	0	0	0	0
NC_007530	1877296	TTGATAATCG.AGAAGAAAAT	A	C	40	PASS	NA	GT	0	0	0	0	0	0	0	0	0	0	0	0	0	1	0	0	0	0	0	0	0	0	0	0	0	0	0	0	0	0	0	0	0	0	0	0	0	0	0	0	0
NC_007530	1877540	AATTATCGGC.TCGATTGTAA	T	C	40	PASS	NA	GT	0	0	0	0	0	1	0	0	0	0	0	0	0	0	0	0	0	0	0	0	0	0	0	0	0	0	0	0	0	0	0	0	0	0	0	0	0	0	0	0	0
NC_007530	1877643	GCATATACAG.CATATGAAGC	C	A	40	PASS	NA	GT	0	0	1	0	0	0	0	0	0	0	0	0	0	0	0	0	0	0	0	0	0	0	0	0	0	0	0	0	0	0	0	0	0	0	0	0	0	0	0	0	0
NC_007530	1878263	AGCGACAATT.ACATTTACGT	A	T	40	PASS	NA	GT	0	0	0	0	0	0	0	0	1	0	0	0	0	0	0	0	0	0	0	0	0	0	0	0	0	0	0	0	0	0	0	0	0	0	0	0	0	0	0	0	0
NC_007530	1879099	ATGAGATTAG.CTTCTTTTTT	C	T	40	PASS	NA	GT	0	0	0	0	0	0	0	0	0	0	0	0	0	0	0	0	0	0	0	0	0	0	0	0	0	0	0	0	0	0	0	0	0	0	0	0	0	0	0	0	0
NC_007530	1879100	TGAGATTAGC.TTCTTTTTTA	T	C	40	PASS	NA	GT	0	0	0	0	0	0	0	0	0	0	0	0	0	0	0	0	0	0	0	0	0	0	0	0	0	0	0	0	0	0	0	0	0	0	0	0	0	0	0	0	0
NC_007530	1879347	GTCCGCACCT.AATTCTTGTA	A	T	40	PASS	NA	GT	0	0	0	0	0	0	0	0	1	0	0	0	0	0	0	0	0	0	0	0	0	0	0	0	0	0	0	0	0	0	0	0	0	0	0	0	0	0	0	0	0
NC_007530	1879784	CTAATGTAGA.GTCTTGCCCG	G	T	40	PASS	NA	GT	0	0	0	0	0	0	0	0	0	0	0	0	0	1	0	0	0	0	0	0	0	0	0	0	0	0	0	0	0	0	0	0	0	0	0	0	0	0	0	0	0
NC_007530	1880781	AGAAGCGAAG.CCGGAACCGA	C	T	40	PASS	NA	GT	0	0	0	0	0	0	0	0	0	0	0	0	0	0	0	0	0	0	0	0	0	0	0	0	0	0	0	0	0	0	0	0	0	0	0	0	0	0	0	0	0
NC_007530	1881271	TCGACGAAGA.AAACGGAGGA	A	T	40	PASS	NA	GT	0	0	0	0	0	0	0	0	1	0	0	0	0	0	0	0	0	0	0	0	0	0	0	0	0	0	0	0	0	0	0	0	0	0	0	0	0	0	0	0	0
NC_007530	1883996	CGAATTTGAT.CACTAAGTGC	C	T	40	PASS	NA	GT	0	0	0	0	0	0	0	0	0	0	0	0	0	0	0	0	0	0	0	0	0	0	0	0	0	0	0	0	0	0	0	0	0	0	0	0	0	0	0	0	0
NC_007530	1885243	AACTAATAAT.CAGTGGGGGA	C	G	40	PASS	NA	GT	0	0	0	0	0	0	0	0	1	0	0	0	0	0	0	0	0	0	0	0	0	0	0	0	0	0	0	0	0	0	0	0	0	0	0	0	0	0	0	0	0
NC_007530	1885269	AAACCCCCAC.TGATTAAAGT	T	A	40	PASS	NA	GT	0	0	0	0	0	0	0	0	0	0	0	0	0	0	0	0	0	0	0	0	0	0	0	0	0	0	0	0	0	0	0	0	0	0	0	0	0	0	0	0	0
NC_007530	1887019	GAATCTTCTC.ATCAGCTTTC	A	T	40	PASS	NA	GT	0	0	0	0	0	0	0	0	1	0	0	0	0	0	0	0	0	0	0	0	0	0	0	0	0	0	0	0	0	0	0	0	0	0	0	0	0	0	0	0	0
NC_007530	1887418	AGTTTGTTTG.GGGGTATTAC	G	A	40	PASS	NA	GT	0	0	0	0	0	0	0	0	0	0	0	0	0	0	0	0	0	0	1	0	0	0	0	0	0	0	0	0	0	0	0	0	0	0	0	0	0	0	0	0	0
NC_007530	1887864	TTGCAAAAAG.TTCGAGAAGA	T	C	40	PASS	NA	GT	0	0	0	0	0	0	0	0	0	0	0	0	0	0	0	0	0	0	0	0	0	0	0	0	0	0	0	0	0	0	0	0	0	0	0	0	0	0	0	0	0
NC_007530	1889000	GGTATGAGGG.AGCTACAGCT	A	G	40	PASS	NA	GT	0	0	0	0	0	0	0	0	0	1	0	0	0	0	0	0	0	0	0	0	0	0	0	0	0	0	0	0	0	0	0	0	0	0	0	0	0	0	0	0	0
NC_007530	1889008	GGAGCTACAG.CTTTGGGAAG	C	T	40	PASS	NA	GT	0	0	0	0	0	0	0	0	0	0	0	0	0	0	0	0	0	0	0	0	0	0	0	0	0	0	0	0	0	0	0	0	0	0	0	0	0	0	0	0	0
NC_007530	1889201	GCCTATTTTA.TGAGAAAACA	T	A	40	PASS	NA	GT	0	0	0	0	0	0	0	0	1	0	0	0	0	0	0	0	0	0	0	0	0	0	0	0	0	0	0	0	0	0	0	0	0	0	0	0	0	0	0	0	0
NC_007530	1890080	AATATTGGTA.AAAAAGGATA	A	C	40	PASS	NA	GT	0	0	0	0	0	0	0	0	0	1	0	0	0	0	0	0	0	0	0	0	0	0	0	0	0	0	0	0	0	0	0	0	0	0	0	0	0	0	0	0	0
NC_007530	1890373	AGGCGGGGCT.CTTATTTATT	C	T	40	PASS	NA	GT	0	0	0	0	0	0	0	0	0	0	0	0	0	1	0	0	0	0	0	0	0	0	0	0	0	0	0	0	0	0	0	0	0	0	0	0	0	0	0	0	0
NC_007530	1890376	CGGGGCTCTT.ATTTATTTCG	A	T	40	PASS	NA	GT	0	0	0	0	0	0	0	0	0	0	0	0	0	1	0	0	0	0	0	0	0	0	0	0	0	0	0	0	0	0	0	0	0	0	0	0	0	0	0	0	0
NC_007530	1890380	GCTCTTATTT.ATTTCGTGAC	A	T	40	PASS	NA	GT	0	0	0	0	0	0	0	0	0	0	0	0	0	1	0	0	0	0	1	0	0	0	0	0	0	0	0	0	0	0	0	0	0	0	0	0	0	0	0	0	0
NC_007530	1890384	TTATTTATTT.CGTGACACTT	C	T	40	PASS	NA	GT	0	0	0	0	0	0	0	0	0	0	0	0	0	1	0	0	0	0	1	0	0	0	0	0	0	0	0	0	0	0	0	0	0	0	0	0	0	0	0	0	0
NC_007530	1890385	TATTTATTTC.GTGACACTTT	G	T	40	PASS	NA	GT	0	0	0	0	0	0	0	0	0	0	0	0	0	1	0	0	0	0	0	0	0	0	0	0	0	0	0	0	0	0	0	0	0	0	0	0	0	0	0	0	0
NC_007530	1890395	GTGACACTTT.CTATTACGAA	C	T	40	PASS	NA	GT	0	0	0	0	0	0	0	0	0	0	0	0	0	1	0	0	0	0	0	0	0	0	0	0	0	0	0	0	0	0	0	0	0	0	0	0	0	0	0	0	0
NC_007530	1890397	GACACTTTCT.ATTACGAAGC	A	T	40	PASS	NA	GT	0	0	0	0	0	0	0	0	0	0	0	0	0	1	0	0	0	0	0	0	0	0	0	0	0	0	0	0	0	0	0	0	0	0	0	0	0	0	0	0	0
NC_007530	1890400	ACTTTCTATT.ACGAAGCCAT	A	T	40	PASS	NA	GT	0	0	0	0	0	0	0	0	0	0	0	0	0	1	0	0	0	0	0	0	0	0	0	0	0	0	0	0	0	0	0	0	0	0	0	0	0	0	0	0	0
NC_007530	1890401	CTTTCTATTA.CGAAGCCATT	C	T	40	PASS	NA	GT	0	0	0	0	0	0	0	0	0	0	0	0	0	1	0	0	0	0	0	0	0	0	0	0	0	0	0	0	0	0	0	0	0	0	0	0	0	0	0	0	0
NC_007530	1890408	TTACGAAGCC.ATTAAAAAGA	A	C	40	PASS	NA	GT	0	0	0	0	0	0	0	0	0	0	0	0	0	1	0	0	0	0	0	0	0	0	0	0	0	0	0	0	0	0	0	0	0	0	0	0	0	0	0	0	0
NC_007530	1890424	AAGATTAGTT.GCCACTTCTA	G	T	40	PASS	NA	GT	0	0	0	0	0	0	0	0	0	0	0	0	0	1	0	0	0	0	0	0	0	0	0	0	0	0	0	0	0	0	0	0	0	0	0	0	0	0	0	0	0
NC_007530	1890425	AGATTAGTTG.CCACTTCTAA	C	T	40	PASS	NA	GT	0	0	0	0	0	0	0	0	0	0	0	0	0	1	0	0	0	0	0	0	0	0	0	0	0	0	0	0	0	0	0	0	0	0	0	0	0	0	0	0	0
NC_007530	1890429	TAGTTGCCAC.TTCTAAAGAA	T	C	40	PASS	NA	GT	0	0	0	0	0	0	0	0	0	0	0	0	0	1	0	0	0	0	0	0	0	0	0	0	0	0	0	0	0	0	0	0	0	0	0	0	0	0	0	0	0
NC_007530	1890431	GTTGCCACTT.CTAAAGAAAT	C	T	40	PASS	NA	GT	0	0	0	0	0	0	0	0	0	0	0	0	0	1	0	0	0	0	0	0	0	0	0	0	0	0	0	0	0	0	0	0	0	0	0	0	0	0	0	0	0
NC_007530	1893385	ATAATACGAG.CAATAATAAT	C	T	40	PASS	NA	GT	0	0	0	0	0	0	0	0	0	0	0	0	0	0	0	0	0	0	0	0	0	0	0	0	0	0	0	0	0	0	0	0	0	0	0	0	0	0	0	0	0
NC_007530	1893659	TTGTTGATTG.TCCATGTTAT	T	G	40	PASS	NA	GT	0	0	0	0	0	0	0	0	0	0	0	0	0	0	0	0	0	0	0	0	0	0	0	0	0	0	0	0	0	0	0	0	0	0	0	0	0	0	0	0	0
NC_007530	1894397	TTCAATGACT.TTTTTGTGAT	T	A	40	PASS	NA	GT	0	0	0	0	0	0	0	0	0	0	0	0	0	0	0	0	0	0	0	0	0	0	0	0	0	0	0	0	0	0	0	0	0	0	0	0	0	0	0	0	0
NC_007530	1895668	ATATACATAG.AGGGAAGGAA	A	G	40	PASS	NA	GT	0	0	0	0	0	0	0	0	1	0	0	0	0	0	0	0	0	0	0	0	0	0	0	0	0	0	0	0	0	0	0	0	0	0	0	0	0	0	0	0	0
NC_007530	1895671	TACATAGAGG.GAAGGAAGAA	G	C	40	PASS	NA	GT	0	0	0	0	0	0	0	0	1	0	0	0	0	0	0	0	0	0	0	0	0	0	0	0	0	0	0	0	0	0	0	0	0	0	0	0	0	0	0	0	0
NC_007530	1896300	TTCTTTTATA.CGGAATAAAT	C	T	40	PASS	NA	GT	0	0	0	0	0	0	0	0	0	0	0	0	0	0	0	0	0	0	0	0	0	0	0	0	0	0	0	0	1	0	0	0	0	0	0	0	0	0	0	0	0
NC_007530	1896636	CATGTCGGGA.GATGTTGGAA	G	T	40	PASS	NA	GT	0	0	1	0	0	0	0	0	0	0	0	0	0	0	0	0	0	0	0	0	0	0	0	0	0	0	0	0	0	0	0	0	0	0	0	0	0	0	0	0	0
NC_007530	1896977	AACCAGCAAG.GCTTACAGAA	G	T	40	PASS	NA	GT	0	0	1	0	0	0	0	0	0	0	0	0	0	0	0	0	0	0	0	0	0	0	0	0	0	0	0	0	0	0	0	0	0	0	0	0	0	0	0	0	0
NC_007530	1897428	TTTCATTTTT.AACCACTCCT	A	G	40	PASS	NA	GT	0	0	0	0	0	0	0	0	1	0	0	0	0	0	0	0	0	0	0	0	0	0	0	0	0	0	0	0	0	0	0	0	0	0	0	0	0	0	0	0	0
NC_007530	1897430	TCATTTTTAA.CCACTCCTTA	C	T	40	PASS	NA	GT	0	0	0	0	0	0	0	0	1	0	0	0	0	0	0	0	0	0	0	0	0	0	0	0	0	0	0	0	0	0	0	0	0	0	0	0	0	0	0	0	0
NC_007530	1897766	TGAAGTGAAG.ATTTTTGAAG	A	G	40	PASS	NA	GT	0	0	0	0	0	0	0	0	0	0	0	0	0	1	0	0	0	0	0	0	0	0	0	0	0	0	0	0	0	0	0	0	0	0	0	0	0	0	0	0	0
NC_007530	1898312	CGGATTTTGT.GAAATAGTAG	G	T	40	PASS	NA	GT	0	0	1	0	0	0	0	0	0	0	0	0	0	0	0	0	0	0	0	0	0	0	0	0	0	0	0	0	0	0	0	0	0	0	0	0	0	0	0	0	0
NC_007530	1898570	AGCAATTCGC.GAATTGCATT	G	A	40	PASS	NA	GT	0	0	0	0	0	0	0	0	0	0	0	0	0	0	0	0	0	0	0	0	0	0	0	0	0	0	0	0	0	0	0	0	0	0	0	0	0	0	0	0	0
NC_007530	1899258	ATACAAGCAT.CTATGCAAGA	C	T	40	PASS	NA	GT	0	1	0	0	0	0	0	1	0	0	1	1	1	1	0	0	0	0	0	0	0	0	0	0	0	0	0	0	0	0	0	0	0	0	0	0	0	0	0	0	0
NC_007530	1899503	GGGCTATATG.GTAGAGGCTG	G	A	40	PASS	NA	GT	0	0	0	0	0	0	0	0	0	0	0	0	0	0	0	0	0	0	0	1	0	0	0	0	0	0	0	0	0	0	0	0	0	0	0	0	0	0	0	0	0
NC_007530	1899510	ATGGTAGAGG.CTGCAAAGGG	C	T	40	PASS	NA	GT	0	0	0	0	0	0	0	0	0	0	0	0	0	0	0	0	0	0	0	0	1	0	0	0	0	0	0	0	0	0	0	0	0	0	0	0	0	0	0	0	0
NC_007530	1900124	CTTCAATTTG.GTTCGTAATA	G	T	40	PASS	NA	GT	0	0	0	0	0	0	0	0	0	0	0	0	0	0	0	0	0	0	0	0	0	0	0	0	0	0	0	0	0	0	0	0	0	0	0	0	0	0	0	0	0
NC_007530	1900181	GAGAAGGTAA.GAAGTTAGAT	G	C	40	PASS	NA	GT	0	0	0	0	0	0	0	0	0	1	0	0	0	0	0	0	0	0	0	0	0	0	0	0	0	0	0	0	0	0	0	0	0	0	0	0	0	0	0	0	0
NC_007530	1900443	CATGTTTTCA.CGTAAAGAAG	C	A	40	PASS	NA	GT	0	0	0	0	0	0	0	0	0	1	0	0	0	0	0	0	0	0	0	0	0	0	0	0	0	0	0	0	0	0	0	0	0	0	0	0	0	0	0	0	0
NC_007530	1901759	AGAACATTTT.GAGGAGTGTG	G	A	40	PASS	NA	GT	0	0	0	0	0	0	0	0	1	0	0	0	0	0	0	0	0	0	0	0	0	0	0	0	0	0	0	0	0	0	0	0	0	0	0	0	0	0	0	0	0
NC_007530	1915492	CAGCACCATA.TTTCCTTGAG	T	A	40	PASS	NA	GT	0	0	0	0	0	0	0	0	0	0	0	0	1	0	0	0	0	0	0	0	0	0	0	0	0	0	0	0	0	0	0	0	0	0	0	0	0	0	0	0	0
NC_007530	1915515	ACTTCATTCC.CAACATTTTT	C	A	40	PASS	NA	GT	0	0	0	0	0	0	0	0	0	0	0	0	1	0	0	0	0	0	0	0	0	0	0	0	0	0	0	0	0	0	0	0	0	0	0	0	0	0	0	0	0
NC_007530	1915553	TGTGAAAGAA.CAAGGGGATA	C	A	40	PASS	NA	GT	0	0	0	0	0	0	0	0	0	0	0	0	1	0	0	0	0	0	0	0	0	0	0	0	0	0	0	0	0	0	0	0	0	0	0	0	0	0	0	0	0
NC_007530	1917805	TCTATCCATG.CGATCTATAG	C	A	40	PASS	NA	GT	0	0	1	0	0	0	0	0	0	0	0	0	0	0	0	0	0	0	0	0	0	0	0	0	0	0	0	0	0	0	0	0	0	0	0	0	0	0	0	0	0
NC_007530	1919126	GGTCAGACAG.TCCAGTACCA	T	G	40	PASS	NA	GT	0	0	0	0	0	0	0	0	0	0	0	0	0	1	0	0	0	0	0	0	0	0	0	0	0	0	0	0	0	0	0	0	0	0	0	0	0	0	0	0	0
NC_007530	1919163	AAAAAAGAAG.TATGATATTG	T	G	40	PASS	NA	GT	0	0	0	0	0	0	0	0	0	0	0	0	0	1	0	0	0	0	0	0	0	0	0	0	0	0	0	0	0	0	0	0	0	0	0	0	0	0	0	0	0
NC_007530	1919179	ATTGATATCG.TATATCGGGG	T	G	40	PASS	NA	GT	0	0	0	0	0	0	0	0	0	0	0	0	0	1	0	0	0	0	0	0	0	0	0	0	0	0	0	0	0	0	0	0	0	0	0	0	0	0	0	0	0
NC_007530	1920151	TTGGAACATT.ATCAATCTCT	A	T	40	PASS	NA	GT	0	0	0	0	0	0	0	0	1	0	0	0	0	0	0	0	0	0	0	0	0	0	0	0	0	0	0	0	0	0	0	0	0	0	0	0	0	0	0	0	0
NC_007530	1920152	TGGAACATTA.TCAATCTCTT	T	C	40	PASS	NA	GT	0	0	0	0	0	0	0	0	0	0	0	0	0	0	0	0	0	0	0	0	0	0	0	0	0	0	0	0	0	0	0	0	0	0	0	0	0	0	0	0	0
NC_007530	1921853	ACCACTTGCG.GTTTCAAAGA	G	C	40	PASS	NA	GT	0	0	0	0	0	0	0	0	0	1	0	0	0	0	0	0	0	0	0	0	0	0	0	0	0	0	0	0	0	0	0	0	0	0	0	0	0	0	0	0	0
NC_007530	1923006	TTTAACTTGT.GGATGCTTTC	G	T	40	PASS	NA	GT	0	0	1	0	0	0	0	0	0	0	0	0	0	0	0	0	0	0	0	0	0	0	0	0	0	0	0	0	0	0	0	0	0	0	0	0	0	0	0	0	0
NC_007530	1924092	ACATGGTTTT.GTAATTGTAC	G	T	40	PASS	NA	GT	0	0	0	0	0	0	0	0	1	0	0	0	0	0	0	0	0	0	0	0	0	0	0	0	0	0	0	0	0	0	0	0	0	0	0	0	0	0	0	0	0
NC_007530	1924878	GGATGTATGT.ACGCATGCTG	A	G	40	PASS	NA	GT	0	0	0	0	0	0	0	0	0	0	0	0	0	0	0	0	0	0	0	0	0	0	0	0	0	0	0	0	0	0	0	0	0	0	0	0	0	0	0	0	0
NC_007530	1925503	GACCATTCAA.AAGATGAGAA	A	T	40	LCB	NA	GT	0	1	0	0	0	0	0	1	0	0	1	1	1	1	0	0	0	0	0	0	0	0	0	0	0	0	0	0	0	0	0	0	0	0	0	0	0	1	0	0	0
NC_007530	1925832	CCCTGGTGAG.TTTACTGGGA	T	G	40	PASS	NA	GT	0	0	0	0	0	0	0	0	0	0	0	0	0	0	0	0	0	0	0	0	0	0	0	0	0	0	0	0	0	0	0	0	0	0	1	1	0	0	0	0	0
NC_007530	1926135	AGCCGATTGA.TAACATCGGT	T	G	40	PASS	NA	GT	0	0	0	0	0	0	0	0	1	0	0	0	0	0	0	0	0	0	0	0	0	0	0	0	0	0	0	0	0	0	0	0	0	0	0	0	0	0	0	0	0
NC_007530	1927202	GGAGAAAGGA.AAATATCCAT	A	G	40	PASS	NA	GT	0	0	0	0	0	0	0	0	1	0	0	0	0	0	0	0	0	0	0	0	0	0	0	0	0	0	0	0	0	0	0	0	0	0	0	0	0	0	0	0	0
NC_007530	1927203	GAGAAAGGAA.AATATCCATG	A	G	40	PASS	NA	GT	0	0	0	0	0	0	0	0	1	0	0	0	0	0	0	0	0	0	0	0	0	0	0	0	0	0	0	0	0	0	0	0	0	0	0	0	0	0	0	0	0
NC_007530	1927260	TATTCATTTG.GATGAACATC	G	T	40	PASS	NA	GT	0	0	1	0	0	0	0	0	0	0	0	0	0	0	0	0	0	0	0	0	0	0	0	0	0	0	0	0	0	0	0	0	0	0	0	0	0	0	0	0	0
NC_007530	1928051	TTAAAAGTGA.TGCAGTATTG	T	C	40	PASS	NA	GT	0	0	0	0	0	0	0	0	0	0	0	0	0	0	0	0	0	0	0	0	0	0	0	0	0	0	1	0	0	0	0	0	0	0	0	0	0	0	0	0	0
NC_007530	1928506	GGTAAGAGAC.GGCGAATTAA	G	T	40	PASS	NA	GT	0	1	0	0	0	0	0	1	0	0	1	1	1	1	0	0	0	0	0	0	0	0	0	0	0	0	0	0	0	0	0	0	0	0	0	0	0	0	0	0	0
NC_007530	1928615	ACTTGTGAAC.CGATCGCATT	C	A	40	PASS	NA	GT	0	0	1	0	0	0	0	0	0	0	0	0	0	0	0	0	0	0	0	0	0	0	0	0	0	0	0	0	0	0	0	0	0	0	0	0	0	0	0	0	0
NC_007530	1928737	TGCTCAAGTG.GCAGTTGAAG	G	T	40	PASS	NA	GT	0	0	0	0	0	0	0	0	0	1	0	0	0	0	0	0	0	0	0	0	0	0	0	0	0	0	0	0	0	0	0	0	0	0	0	0	0	0	0	0	0
NC_007530	1928854	TAAGATTAAA.CATGTATATG	C	T	40	PASS	NA	GT	0	0	0	0	0	0	0	0	0	0	0	0	0	0	0	0	0	0	0	0	0	0	0	0	0	0	0	0	0	0	0	0	0	0	0	0	0	0	0	0	0
NC_007530	1930330	AATCCAAAAA.GAAATCGTTA	G	A	40	PASS	NA	GT	0	0	0	0	0	0	0	0	0	0	0	0	0	0	0	0	0	0	0	0	0	0	0	0	0	0	0	0	0	0	0	0	0	0	0	0	0	0	0	0	0
NC_007530	1930917	GTTTCAAATA.CAGTTAGTAC	C	G	40	PASS	NA	GT	0	0	0	0	0	0	0	0	1	0	0	0	0	0	0	0	0	0	0	0	0	0	0	0	0	0	0	0	0	0	0	0	0	0	0	0	0	0	0	0	0
NC_007530	1931833	TCACCTCCTG.CAATTATGTT	C	A	40	PASS	NA	GT	0	0	0	0	0	0	0	0	0	1	0	0	0	0	0	0	0	0	0	0	0	0	0	0	0	0	0	0	0	0	0	0	0	0	0	0	0	0	0	0	0
NC_007530	1931834	CACCTCCTGC.AATTATGTTA	A	C	40	PASS	NA	GT	0	0	0	0	0	0	0	0	0	1	0	0	0	0	0	0	0	0	0	0	0	0	0	0	0	0	0	0	0	0	0	0	0	0	0	0	0	0	0	0	0
NC_007530	1932595	ACAATCGATA.AAAAATATAT	A	G	40	PASS	NA	GT	0	0	0	0	0	0	0	0	1	0	0	0	0	0	0	0	0	0	0	0	0	0	0	0	0	0	0	0	0	0	0	0	0	0	0	0	0	0	0	0	0
NC_007530	1937045	CTAGAGCTTG.TACATAACTT	T	C	40	PASS	NA	GT	0	0	0	0	0	0	0	0	0	0	0	0	0	0	0	0	0	0	0	0	0	0	1	0	0	0	0	0	0	0	1	0	0	0	0	0	0	0	0	0	0
NC_007530	1939057	ATAAGCAGGC.GCGCGAGGTA	G	A	40	PASS	NA	GT	0	0	0	0	0	0	0	0	0	0	0	0	0	0	0	0	0	0	0	0	0	0	0	0	0	0	0	0	0	0	0	0	0	0	0	0	0	0	0	0	0
NC_007530	1939748	TATAATAAAA.AAGTACACGC	A	G	40	PASS	NA	GT	0	0	0	0	0	0	0	0	1	0	0	0	0	0	0	0	0	0	0	0	0	0	0	0	0	0	0	0	0	0	0	0	0	0	0	0	0	0	0	0	0
NC_007530	1943035	CATTATGTAT.ACGATGTCAG	A	G	40	PASS	NA	GT	0	0	0	0	0	0	0	0	0	0	0	0	0	0	0	0	0	0	0	0	0	0	0	0	0	0	0	0	1	0	0	0	0	0	0	0	0	0	0	0	0
NC_007530	1943300	AAGCGCCCAC.GTATGAGAAA	G	T	40	PASS	NA	GT	0	0	1	0	0	0	0	0	0	0	0	0	0	0	0	0	0	0	0	0	0	0	0	0	0	0	0	0	0	0	0	0	0	0	0	0	0	0	0	0	0
NC_007530	1944508	AGAATTAGAA.GCACAAGGGG	G	A	40	PASS	NA	GT	0	0	0	0	0	0	0	0	0	0	0	0	0	0	0	0	0	0	0	0	0	0	0	0	0	0	0	0	0	0	0	0	0	0	0	0	0	0	0	0	0
NC_007530	1945043	GGCAAGTACA.TTAAAACGCG	T	G	40	PASS	NA	GT	0	0	0	0	0	0	0	0	0	0	0	0	0	0	0	0	0	0	0	0	0	0	0	0	0	0	0	0	0	0	0	0	0	0	0	0	0	0	0	0	0
NC_007530	1945044	GCAAGTACAT.TAAAACGCGC	T	G	40	PASS	NA	GT	0	0	0	0	0	0	0	0	0	0	0	0	0	0	0	0	0	0	0	0	0	0	0	0	0	0	0	0	0	0	0	0	0	0	0	0	0	0	0	0	0
NC_007530	1945074	GGTGAAACGT.TAGCAGAAGG	T	A	40	PASS	NA	GT	0	0	0	0	0	0	0	0	0	0	0	0	0	0	0	0	0	0	0	0	0	0	0	0	0	0	0	0	0	0	0	0	0	0	0	0	0	0	0	0	0
NC_007530	1945075	GTGAAACGTT.AGCAGAAGGA	A	T	40	PASS	NA	GT	0	0	0	0	0	0	0	0	0	0	0	0	0	0	0	0	0	0	0	0	0	0	0	0	0	0	0	0	0	0	0	0	0	0	0	0	0	0	0	0	0
NC_007530	1945079	AACGTTAGCA.GAAGGAATTG	G	T	40	PASS	NA	GT	0	0	0	0	0	0	0	0	0	0	0	0	0	0	0	0	0	0	0	0	0	0	0	0	0	0	0	0	0	0	0	0	0	0	0	0	0	0	0	0	0
NC_007530	1945083	TTAGCAGAAG.GAATTGGGTG	G	A	40	PASS	NA	GT	0	0	0	0	0	0	0	0	0	0	0	0	0	0	0	0	0	0	0	0	0	0	0	0	0	0	0	0	0	0	0	0	0	0	0	0	0	0	0	0	0
NC_007530	1948074	CTGAATCGTT.ATGATTCAGT	A	T	40	PASS	NA	GT	0	0	0	0	0	0	0	0	0	0	0	0	0	0	0	0	0	0	0	0	0	0	0	0	0	0	0	0	0	0	0	0	0	0	0	0	0	0	0	0	0
NC_007530	1948942	TTTTGTAATA.AGGGTATGTA	A	C	40	PASS	NA	GT	0	0	0	0	0	0	0	0	0	0	0	0	0	1	0	0	0	0	0	0	0	0	0	0	0	0	0	0	0	0	0	0	0	0	0	0	0	0	0	0	0
NC_007530	1949039	GATTGGTCTT.CTTTAGAAAC	C	T	40	PASS	NA	GT	0	0	0	0	0	0	0	0	0	0	0	0	0	0	1	0	0	0	0	0	0	0	0	0	0	0	0	0	0	0	0	0	0	0	0	0	0	0	0	0	0
NC_007530	1949099	TAAACTTGAT.AGGAAGATGA	A	G	40	PASS	NA	GT	0	1	1	1	1	1	1	1	1	1	1	1	1	1	1	1	1	1	1	1	1	1	1	1	1	1	1	1	1	1	1	1	1	1	1	1	1	1	1	1	1
NC_007530	1949241	TCGTCGTTTT.TTGAACTTCT	T	A	40	PASS	NA	GT	0	0	0	0	0	0	0	0	1	0	0	0	0	0	0	0	0	0	0	0	0	0	0	0	0	0	0	0	0	0	0	0	0	0	0	0	0	0	0	0	0
NC_007530	1949242	CGTCGTTTTT.TGAACTTCTT	T	C	40	PASS	NA	GT	0	0	0	0	0	0	0	0	1	0	0	0	0	0	0	0	0	0	0	0	0	0	0	0	0	0	0	0	0	0	0	0	0	0	0	0	0	0	0	0	0
NC_007530	1950361	TTCAATAATT.CGTGTATAAG	C	T	40	PASS	NA	GT	0	0	0	0	0	0	0	0	0	0	0	0	0	0	0	0	0	0	0	0	0	0	0	0	0	0	0	0	0	0	0	0	0	0	1	1	0	0	0	0	0
NC_007530	1950798	ATATTTTTCA.GTAAATGAAG	G	T	40	LCB	NA	GT	0	0	0	0	0	0	0	0	0	0	0	0	0	1	0	0	0	0	0	0	0	0	0	0	0	0	0	0	0	0	0	0	0	0	0	0	0	0	0	0	0
NC_007530	1952763	TGAATAAACA.TTTTAAAGTG	T	C	40	PASS	NA	GT	0	0	0	0	0	0	0	0	0	1	0	0	0	0	0	0	0	0	0	0	0	0	0	0	0	0	0	0	0	0	0	0	0	0	0	0	0	0	0	0	0
NC_007530	1953731	AGAAAGTTCC.CATATAAATA	C	A	40	PASS	NA	GT	0	0	1	0	0	0	0	0	0	0	0	0	0	0	0	0	0	0	0	0	0	0	0	0	0	0	0	0	0	0	0	0	0	0	0	0	0	0	0	0	0
NC_007530	1954468	TGTTGATAAG.CGGATTCAAC	C	T	40	PASS	NA	GT	0	0	0	0	0	0	0	0	0	0	0	0	0	0	0	0	0	0	0	0	0	0	0	0	0	0	0	0	0	0	0	0	0	1	0	0	0	0	0	0	0
NC_007530	1954568	AGATTTCTCG.GTTCATATAT	G	T	40	PASS	NA	GT	0	1	1	1	1	1	1	1	1	1	1	1	1	1	1	1	1	1	1	1	1	1	1	1	1	1	1	1	1	1	1	1	1	1	1	1	1	1	1	1	1
NC_007530	1955082	GAAAGAAAAA.GGGTGCAGTT	G	T	40	PASS	NA	GT	0	0	1	0	0	0	0	0	0	0	0	0	0	0	0	0	0	0	0	0	0	0	0	0	0	0	0	0	0	0	0	0	0	0	0	0	0	0	0	0	0
NC_007530	1955356	AAAATAAAGA.AATTATCTAT	A	G	40	PASS	NA	GT	0	0	0	0	0	0	0	0	0	0	0	0	0	1	0	0	0	0	0	0	0	0	0	0	0	0	0	0	0	0	0	0	0	0	0	0	0	0	0	0	0
NC_007530	1955358	AATAAAGAAA.TTATCTATAC	T	C	40	PASS	NA	GT	0	0	0	0	0	0	0	0	1	0	0	0	0	0	0	0	0	0	0	0	0	0	0	0	0	0	0	0	0	0	0	0	0	0	0	0	0	0	0	0	0
NC_007530	1956301	CAGTGAAAAC.GGATATATCT	G	A	40	PASS	NA	GT	0	0	0	0	0	0	0	0	0	0	0	0	0	0	0	0	0	0	0	0	0	0	0	0	0	0	0	0	0	0	0	0	0	0	0	0	0	0	0	0	0
NC_007530	1956494	CTCCTATTTT.TTTAAGAAGT	T	C	40	PASS	NA	GT	0	0	0	0	0	0	0	0	0	0	0	0	0	0	0	0	0	0	0	0	0	0	0	0	0	0	0	0	0	0	0	0	0	0	0	0	0	0	0	0	0
NC_007530	1956924	TAAAAAGAAT.ACGAAGGAAC	A	T	40	PASS	NA	GT	0	0	0	0	0	0	0	0	0	1	0	0	0	0	0	0	0	0	0	0	0	0	0	0	0	0	0	0	0	0	0	0	0	0	0	0	0	0	0	0	0
NC_007530	1956925	AAAAAGAATA.CGAAGGAACA	C	A	40	PASS	NA	GT	0	0	0	0	0	0	0	0	0	1	0	0	0	0	0	0	0	0	0	0	0	0	0	0	0	0	0	0	0	0	0	0	0	0	0	0	0	0	0	0	0
NC_007530	1957865	TGTAAAGAGA.ATGGAGACAT	A	G	40	PASS	NA	GT	0	0	0	0	0	0	0	0	0	1	0	0	0	0	0	0	0	0	0	0	0	0	0	0	0	0	0	0	0	0	0	0	0	0	0	0	0	0	0	0	0
NC_007530	1959696	GTGACCTACC.AGTTGCCTCT	A	C	40	LCB	NA	GT	0	0	0	0	0	0	0	0	0	0	0	0	0	0	0	0	0	0	0	0	0	0	0	0	1	0	0	0	0	0	0	0	0	0	0	0	0	0	0	0	0
NC_007530	1961764	AACCGAAAGA.CTCTATATCT	C	T	40	PASS	NA	GT	0	0	0	0	0	0	0	0	0	0	0	0	0	0	0	0	0	0	0	0	0	0	0	0	0	0	0	0	1	0	0	0	0	0	0	0	0	0	0	0	0
NC_007530	1963426	GGGTATTATA.AGTATTATTC	A	T	40	PASS	NA	GT	0	0	0	0	0	0	0	0	0	1	0	0	0	0	0	0	0	0	0	0	0	0	0	0	0	0	0	0	0	0	0	0	0	0	0	0	0	0	0	0	0
NC_007530	1963427	GGTATTATAA.GTATTATTCT	G	T	40	PASS	NA	GT	0	0	0	0	0	0	0	0	0	1	0	0	0	0	0	0	0	0	0	0	0	0	0	0	0	0	0	0	0	0	0	0	0	0	0	0	0	0	0	0	0
NC_007530	1963521	AATGTGACGA.GAGTAGTTTT	G	T	40	PASS	NA	GT	0	0	1	0	0	0	0	0	0	0	0	0	0	0	0	0	0	0	0	0	0	0	0	0	0	0	0	0	0	0	0	0	0	0	0	0	0	0	0	0	0
NC_007530	1963819	CGGTGAGGAG.TTTTTCTCTT	T	G	40	PASS	NA	GT	0	0	0	0	0	0	0	0	0	0	0	0	0	1	0	0	0	0	0	0	0	0	0	0	0	0	0	0	0	0	0	0	0	0	0	0	0	0	0	0	0
NC_007530	1963824	AGGAGTTTTT.CTCTTCTACA	C	T	40	PASS	NA	GT	0	0	0	0	0	0	0	0	0	0	0	0	0	1	0	0	0	0	0	0	0	0	0	0	0	0	0	0	0	0	0	0	0	0	0	0	0	0	0	0	0
NC_007530	1964626	GTAGTGCAGA.GTTTTGGAAT	G	T	40	PASS	NA	GT	0	0	1	0	0	0	0	0	0	0	0	0	0	0	0	0	0	0	0	0	0	0	0	0	0	0	0	0	0	0	0	0	0	0	0	0	0	0	0	0	0
NC_007530	1964828	AAAAGGGAAG.GAGCGCGGAG	G	T	40	PASS	NA	GT	0	0	0	0	0	0	0	0	1	0	0	0	0	0	0	0	0	0	0	0	0	0	0	0	0	0	0	0	0	0	0	0	0	0	0	0	0	0	0	0	0
NC_007530	1964883	TCTTCCTTAC.CATTTGAAAA	C	T	40	PASS	NA	GT	0	0	0	0	0	0	0	0	0	0	0	0	0	0	0	0	0	0	0	0	0	0	0	0	0	0	0	0	0	0	0	0	0	0	0	0	0	0	0	0	0
NC_007530	1965013	TTGCAATTTT.AGGACCGACA	A	G	40	PASS	NA	GT	0	0	0	0	0	0	0	0	1	0	0	0	0	0	0	0	0	0	0	0	0	0	0	0	0	0	0	0	0	0	0	0	0	0	0	0	0	0	0	0	0
NC_007530	1966571	CTATGCGGTA.TCCTTAACAG	T	G	40	PASS	NA	GT	0	0	0	0	0	0	0	0	0	0	0	0	0	0	0	0	0	0	0	0	0	0	0	0	0	0	0	0	0	0	0	0	0	0	0	0	0	0	0	0	0
NC_007530	1966776	AAGCAATTAG.CTCAATATGA	C	T	40	PASS	NA	GT	0	0	0	0	0	0	0	0	0	0	0	0	0	0	0	0	0	0	0	0	0	0	0	0	0	0	0	0	0	0	0	0	0	0	0	0	0	0	0	0	0
NC_007530	1966893	GTTACAATTC.GTGAGCTAAA	G	T	40	PASS	NA	GT	0	0	0	0	0	0	0	0	0	0	0	0	0	0	0	0	0	1	0	0	0	0	0	0	0	0	0	0	0	0	0	0	0	0	0	0	0	0	0	0	0
NC_007530	1967560	TTCAAAAAGC.GATTACAGAA	G	T	40	PASS	NA	GT	0	0	1	1	1	1	1	0	0	0	0	0	0	0	0	0	1	0	0	0	0	1	0	0	0	0	0	0	0	0	0	0	0	0	0	0	0	0	0	0	0
NC_007530	1968519	CCGCGGCGGG.AAATTAGAAA	A	G	40	PASS	NA	GT	0	0	0	0	0	0	0	0	0	0	0	0	0	0	0	0	0	0	0	0	0	0	0	0	0	0	0	0	0	0	0	0	0	0	0	0	0	0	0	0	0
NC_007530	1968536	AAATTTTACT.TGCTACTGAT	T	C	40	PASS	NA	GT	0	0	0	0	0	0	0	0	0	0	0	0	0	0	0	0	0	1	0	1	0	0	0	0	0	0	0	0	0	0	0	0	0	0	0	0	0	0	0	0	0
NC_007530	1968954	AAATCCCTGA.TGATGAAAAT	T	A	40	PASS	NA	GT	0	0	0	0	0	0	0	0	1	0	0	0	0	0	0	0	0	0	0	0	0	0	0	0	0	0	0	0	0	0	0	0	0	0	0	0	0	0	0	0	0
NC_007530	1968956	ATCCCTGATG.ATGAAAATAG	A	C	40	PASS	NA	GT	0	0	0	0	0	0	0	0	1	0	0	0	0	0	0	0	0	0	0	0	0	0	0	0	0	0	0	0	0	0	0	0	0	0	0	0	0	0	0	0	0
NC_007530	1968957	TCCCTGATGA.TGAAAATAGT	T	C	40	PASS	NA	GT	0	0	0	0	0	0	0	0	1	0	0	0	0	0	0	0	0	0	0	0	0	0	0	0	0	0	0	0	0	0	0	0	0	0	0	0	0	0	0	0	0
NC_007530	1969330	ATTCGAAGGA.TATAACATGA	T	C	40	PASS	NA	GT	0	0	0	0	0	0	0	0	0	0	0	0	0	0	0	0	0	0	0	0	0	0	0	1	0	0	0	0	0	0	0	0	0	0	0	0	0	0	0	0	0
NC_007530	1970152	AGCGAGAAGA.GCTGTTGTTC	G	A	40	PASS	NA	GT	0	0	0	0	0	0	0	0	0	0	0	0	0	0	0	0	0	0	0	0	0	0	0	0	0	0	0	0	0	0	0	0	0	0	0	0	0	0	0	0	0
NC_007530	1970383	GCTATCCTTC.TCGTATAATT	T	C	40	PASS	NA	GT	0	0	1	0	0	0	0	0	0	0	0	0	0	0	0	0	0	0	0	0	0	0	0	0	0	0	0	0	0	0	0	0	0	0	0	0	0	0	0	0	0
NC_007530	1970592	CAGGAGGAGG.ACTGAACAGT	A	G	40	PASS	NA	GT	0	1	0	0	0	0	0	1	0	0	1	1	1	1	0	0	0	0	0	0	0	0	0	0	0	0	0	0	0	0	0	0	0	0	0	0	0	1	0	0	0
NC_007530	1970701	TTTGCAAATG.TCCGTCACGC	T	C	40	PASS	NA	GT	0	0	0	0	0	0	0	0	0	0	0	0	0	0	0	0	0	0	0	0	0	0	0	0	0	0	0	0	0	0	0	0	0	0	0	0	0	0	0	0	0
NC_007530	1972210	ACTTACACGA.TTACTCTCAA	T	G	40	PASS	NA	GT	0	0	0	0	0	0	0	0	0	0	0	0	0	0	0	0	0	0	0	0	0	0	0	0	0	0	0	0	0	0	0	0	0	0	0	0	0	0	0	0	0
NC_007530	1973042	AGAAAGCTCA.TAGCTTTTGC	T	C	40	PASS	NA	GT	0	0	0	0	0	1	0	0	0	0	0	0	0	0	0	0	0	0	0	0	0	0	0	0	0	0	0	0	0	0	0	0	0	0	0	0	0	0	0	0	0
NC_007530	1973296	TAAATTTATC.CGTTTGAAAG	C	T	40	PASS	NA	GT	0	1	0	0	0	0	0	1	0	0	1	1	1	1	0	0	0	0	0	0	0	0	0	0	0	0	0	0	0	0	0	0	0	0	0	0	0	0	0	0	0
NC_007530	1974942	TTGTTCACAA.TTTAATTGTA	T	A	40	PASS	NA	GT	0	0	0	0	0	0	0	0	0	0	0	0	0	0	0	0	0	0	0	0	0	0	0	0	0	0	0	0	0	0	0	0	0	0	0	0	0	0	0	0	0
NC_007530	1974972	TCATAAAAGT.CTAGTAATTT	C	T	40	PASS	NA	GT	0	0	0	0	0	0	0	0	0	0	0	0	0	0	0	0	0	0	0	0	0	0	0	0	0	0	0	0	0	0	0	0	0	0	0	0	0	0	0	0	0
NC_007530	1975287	GAAATACTCG.GTTTCCCATG	G	T	40	PASS	NA	GT	0	0	0	0	0	0	0	0	1	0	0	0	0	0	0	0	0	0	0	0	0	0	0	0	0	0	0	0	0	0	0	0	0	0	0	0	0	0	0	0	0
NC_007530	1975915	GCGCAAATTG.TTTTAGGAGT	T	C	40	PASS	NA	GT	0	0	0	0	0	0	0	0	1	0	0	0	0	0	0	0	0	0	0	0	0	0	0	0	0	0	0	0	0	0	0	0	0	0	0	0	0	0	0	0	0
NC_007530	1976190	TTAGAATTAT.ATACTTCGTT	A	G	40	PASS	NA	GT	0	0	0	0	0	0	0	0	0	0	0	0	0	0	0	0	0	0	0	0	0	0	0	0	0	0	0	0	0	0	0	0	0	0	0	0	0	0	0	0	0
NC_007530	1977033	CAGCCTTTTC.CTGTATAAAA	C	A	40	PASS	NA	GT	0	0	1	0	0	0	0	0	0	0	0	0	0	0	0	0	0	0	0	0	0	0	0	0	0	0	0	0	0	0	0	0	0	0	0	0	0	0	0	0	0
NC_007530	1977837	AGTAAAAGTA.GAAATGCGCA	G	A	40	PASS	NA	GT	0	0	0	0	0	0	0	0	1	0	0	0	0	0	0	0	0	0	0	0	0	0	0	0	0	0	0	0	0	0	0	0	0	0	0	0	0	0	0	0	0
NC_007530	1977950	CCATAAACTA.CATTTACAAA	C	T	40	PASS	NA	GT	0	0	0	0	0	0	0	0	1	0	0	0	0	0	0	0	0	0	0	0	0	0	0	0	0	0	0	0	0	0	0	0	0	0	0	0	0	0	0	0	0
NC_007530	1979090	GTAACGTGAT.ATAGTGCTCG	A	G	40	PASS	NA	GT	0	0	1	1	1	1	1	0	0	0	0	0	0	0	0	0	1	0	0	0	0	1	0	0	0	0	0	0	1	0	0	0	0	0	0	0	0	0	0	0	0
NC_007530	1982730	AGACGGTGCA.GTTGCGATGG	G	C	40	PASS	NA	GT	0	1	1	1	1	1	1	1	1	1	1	1	1	1	1	1	1	1	1	1	1	1	1	1	1	1	1	1	1	1	1	1	1	1	1	1	1	1	1	1	1
NC_007530	1982812	TATGCGAAGC.AATATACTGA	A	G	40	PASS	NA	GT	0	0	0	0	0	0	0	0	0	0	0	0	0	0	0	0	0	0	0	0	0	0	0	0	0	0	0	0	1	0	0	0	0	0	0	0	0	0	0	0	0
NC_007530	1983018	ATGGAATTTA.CGTTTAGAAG	C	T	40	PASS	NA	GT	0	0	0	0	0	0	0	0	0	0	0	0	0	0	0	0	0	0	0	0	0	0	0	0	0	0	0	0	0	0	0	0	0	0	0	0	0	0	0	0	0
NC_007530	1987020	TCATTCCTTC.TCTCTTACCC	T	C	40	PASS	NA	GT	0	0	0	0	0	1	0	0	0	0	0	0	0	0	0	0	0	0	0	0	0	0	0	0	0	0	0	0	0	0	0	0	0	0	0	0	0	0	0	0	0
NC_007530	1988111	GCAGTATGGC.CATTCACAAG	C	G	40	PASS	NA	GT	0	0	0	0	0	0	0	0	1	0	0	0	0	0	0	0	0	0	0	0	0	0	0	0	0	0	0	0	0	0	0	0	0	0	0	0	0	0	0	0	0
NC_007530	1989319	TACTCTATCT.AAAGGGATGC	A	T	40	PASS	NA	GT	0	0	0	0	0	0	0	0	1	0	0	0	0	0	0	0	0	0	0	0	0	0	0	0	0	0	0	0	0	0	0	0	0	0	0	0	0	0	0	0	0
NC_007530	1989905	TGATGGCGGT.CTTGTAGGGT	C	T	40	PASS	NA	GT	0	0	0	0	0	0	0	0	0	0	0	0	0	0	1	0	0	0	0	0	0	0	0	0	0	0	0	0	0	0	0	0	0	0	0	0	0	0	0	0	0
NC_007530	1990108	CAATTATTAT.GCCATCGGGT	G	T	40	PASS	NA	GT	0	0	1	0	0	0	0	0	0	0	0	0	0	0	0	0	0	0	0	0	0	0	0	0	0	0	0	0	0	0	0	0	0	0	0	0	0	0	0	0	0
NC_007530	1990537	TTTTCTTGAT.TAAGTAAATT	T	C	40	PASS	NA	GT	0	0	0	0	0	0	0	0	0	0	0	0	0	0	0	0	0	0	0	0	0	0	0	0	0	0	0	0	0	0	0	0	0	0	0	0	0	0	0	0	0
NC_007530	1990970	CGTGAAGTTG.CACAGAAATT	C	T	40	PASS	NA	GT	0	0	0	0	0	0	0	0	0	0	0	0	0	0	0	0	0	0	0	0	0	0	0	0	0	0	0	0	0	0	0	0	0	0	0	0	0	0	0	1	0
NC_007530	1992207	AATGGAAGAC.ATGTAAGTAC	A	C	40	PASS	NA	GT	0	0	0	0	0	0	0	0	0	0	0	0	0	0	0	0	0	0	0	0	0	0	0	0	0	0	0	0	0	0	0	0	0	0	0	0	0	0	0	0	0
NC_007530	1992593	ACGTATTTCG.GCAGACGGCA	G	A	40	PASS	NA	GT	0	1	0	0	0	0	0	1	0	0	1	1	1	1	0	0	0	0	0	0	0	0	0	0	0	0	0	0	0	0	0	0	0	0	0	0	0	1	0	0	0
NC_007530	1993533	GTACATGTCC.ATCTTGCGGA	A	G	40	PASS	NA	GT	0	0	0	0	0	0	0	0	0	0	0	0	0	0	0	0	0	0	0	0	0	0	0	0	0	0	0	0	0	0	0	0	0	0	0	0	0	0	0	0	0
NC_007530	1995294	TGGTGCGGTT.ACTACTTTTA	A	G	40	PASS	NA	GT	0	0	0	0	0	0	0	0	0	0	0	0	0	0	0	0	0	0	0	0	0	0	0	0	0	0	0	0	0	0	0	0	0	0	0	0	0	0	0	0	0
[truncated: 2,978 more rows]
[truncated: 42 more columns]
